# Supplementary material for: Expressed sequence tags from organ-specific cDNA libraries of tea (Camellia sinensis) and polymorphisms and transferability of EST-SSRs across Camellia species
Source: PubMed Central journal article supplement — Breed Sci. 2012 Jun 19;62(2):186–95. doi: 10.1270/jsbbs.62.186 (PMC3405963; doi:10.1270/jsbbs.62.186), 2012-06-19
Supplement: 62_186_1.pdf [file 62_186_1.pdf]

**Supplemental Table 1.** Gene Ontology annotation of tea unigenes

| Unigene ID | sequence length (bp) | GO-ID                                                                                                                                      | Biological process                                                                                                                                                                                                              | Cellular component                                 | Molecular function                              |
|------------|----------------------|--------------------------------------------------------------------------------------------------------------------------------------------|---------------------------------------------------------------------------------------------------------------------------------------------------------------------------------------------------------------------------------|----------------------------------------------------|-------------------------------------------------|
| ug0001     | 436                  |                                                                                                                                            |                                                                                                                                                                                                                                 |                                                    |                                                 |
| ug0002     | 1047                 |                                                                                                                                            |                                                                                                                                                                                                                                 |                                                    |                                                 |
| ug0003     | 394                  |                                                                                                                                            |                                                                                                                                                                                                                                 |                                                    |                                                 |
| ug0004     | 1175                 | GO:0005739,GO:0003824,GO:0005215                                                                                                           |                                                                                                                                                                                                                                 | mitochondrion                                      | catalytic activity,transporter activity         |
| ug0005     | 643                  | GO:0005488,GO:0005                                                                                                                         |                                                                                                                                                                                                                                 |                                                    | binding,protein binding                         |
| ug0006     | 751                  |                                                                                                                                            |                                                                                                                                                                                                                                 |                                                    |                                                 |
| ug0007     | 863                  |                                                                                                                                            |                                                                                                                                                                                                                                 |                                                    |                                                 |
| ug0008     | 699                  |                                                                                                                                            |                                                                                                                                                                                                                                 |                                                    |                                                 |
| ug0009     | 688                  | GO:0005840,GO:0005198,GO:0006412                                                                                                           | translation                                                                                                                                                                                                                     | ribosome                                           | structural molecule activity                    |
| ug0010     | 1096                 | GO:0016787,GO:0016043,GO:0009987                                                                                                           | cellular component organization,cellular process                                                                                                                                                                                |                                                    | hydrolase activity                              |
| ug0011     | 604                  |                                                                                                                                            |                                                                                                                                                                                                                                 |                                                    |                                                 |
| ug0012     | 180                  |                                                                                                                                            |                                                                                                                                                                                                                                 |                                                    |                                                 |
| ug0013     | 739                  |                                                                                                                                            |                                                                                                                                                                                                                                 |                                                    |                                                 |
| ug0014     | 730                  | GO:0005488                                                                                                                                 |                                                                                                                                                                                                                                 |                                                    | binding                                         |
| ug0015     | 424                  |                                                                                                                                            |                                                                                                                                                                                                                                 |                                                    |                                                 |
| ug0016     | 560                  |                                                                                                                                            |                                                                                                                                                                                                                                 |                                                    |                                                 |
| ug0017     | 821                  |                                                                                                                                            |                                                                                                                                                                                                                                 |                                                    |                                                 |
| ug0018     | 815                  |                                                                                                                                            |                                                                                                                                                                                                                                 |                                                    |                                                 |
| ug0019     | 740                  |                                                                                                                                            |                                                                                                                                                                                                                                 |                                                    |                                                 |
| ug0020     | 1008                 | GO:0016020,GO:0005794,GO:0005515,GO:0006810,GO:0009987,GO:0005198,GO:000573                                                                | transport,cellular process                                                                                                                                                                                                      | membrane,Golgi apparatus,cytoplasm,plasma membrane | protein binding,structural molecule activity    |
| ug0021     | 792                  |                                                                                                                                            |                                                                                                                                                                                                                                 |                                                    |                                                 |
| ug0022     | 789                  | GO:0005618,GO:0016787,GO:0005576,GO:0005975,GO:0009987,GO:0009058,GO:000519,GO:0016301,GO:0008152,GO:0009987,GO:0000166,GO:000953          | carbohydrate metabolic process,cellular process,catabolic process                                                                                                                                                               | cell wall,extracellular region                     | hydrolase activity                              |
| ug0023     | 489                  | GO:0009058,GO:000519,GO:0016301,GO:0008152,GO:0009987,GO:0000166,GO:000953                                                                 | biosynthetic process,cellular amino acid and derivative metabolic process,metabolic process,cellular process                                                                                                                    | plastid                                            | kinase activity,nucleotide binding              |
| ug0024     | 772                  |                                                                                                                                            |                                                                                                                                                                                                                                 |                                                    |                                                 |
| ug0025     | 176                  |                                                                                                                                            |                                                                                                                                                                                                                                 |                                                    |                                                 |
| ug0026     | 800                  | GO:0003824,GO:0008152,GO:0016020,GO:0009536,GO:0005488                                                                                     | metabolic process                                                                                                                                                                                                               | membrane,plastid                                   | catalytic activity,binding                      |
| ug0027     | 120                  |                                                                                                                                            |                                                                                                                                                                                                                                 |                                                    |                                                 |
| ug0028_1   | 571                  | GO:0005737,GO:0005737,GO:0005488,GO:0003                                                                                                   | biosynthetic process,cellular amino acid and derivative metabolic process                                                                                                                                                       | cytoplasm,plasma membrane                          | binding,catalytic activity,transferase activity |
| ug0028_2   | 550                  | GO:0009058,GO:00066519,GO:0016740                                                                                                          | acid and derivative metabolic process                                                                                                                                                                                           |                                                    |                                                 |
| ug0029     | 760                  |                                                                                                                                            |                                                                                                                                                                                                                                 |                                                    |                                                 |
| ug0030     | 831                  |                                                                                                                                            |                                                                                                                                                                                                                                 |                                                    |                                                 |
| ug0031     | 300                  | GO:0005739,GO:0006091                                                                                                                      | generation of precursor metabolites and energy                                                                                                                                                                                  | mitochondrion                                      |                                                 |
| ug0032     | 873                  | GO:0005739,GO:0009725,GO:0005783,GO:0003824                                                                                                |                                                                                                                                                                                                                                 | mitochondrion,plastid                              |                                                 |
| ug0033     | 515                  | GO:0019725,GO:0005783,GO:0003824                                                                                                           | cellular homeostasis                                                                                                                                                                                                            | endoplasmic reticulum                              | catalytic activity                              |
| ug0034_1   | 908                  | GO:0016020,GO:0008152,GO:0005488,GO:0005737,GO:0005488,GO:000515,GO:000719,GO:0007165,GO:0006091,GO:0009056,GO:000382                      | metabolic process                                                                                                                                                                                                               | membrane                                           | binding,catalytic activity                      |
| ug0034_2   | 571                  | GO:0005737,GO:0005488,GO:000515,GO:000719,GO:0007165,GO:0006091,GO:0009056,GO:000382                                                       | response to endogenous stimulus,signal transduction                                                                                                                                                                             | cytoplasm,mitochondrion                            |                                                 |
| ug0035     | 760                  | GO:0005739,GO:0006091,GO:0005488,GO:0008152,GO:0016740,GO:0005618,GO:0006091,GO:0009056,GO:000382                                          | generation of precursor metabolites and energy                                                                                                                                                                                  | mitochondrion                                      | protein binding                                 |
| ug0036     | 721                  |                                                                                                                                            |                                                                                                                                                                                                                                 |                                                    |                                                 |
| ug0037     | 838                  | GO:0006091,GO:0003824,GO:0005488,GO:0008152,GO:0016740,GO:0005618,GO:0006091,GO:0009056,GO:000382                                          | generation of precursor metabolites and energy                                                                                                                                                                                  | plastid                                            | molecular_function,binding                      |
| ug0038     | 596                  | GO:0005488,GO:0008152,GO:0016740,GO:0005618,GO:0006091,GO:0009056,GO:000382                                                                | biological_process,generation of precursor metabolites and energy,catabolic process                                                                                                                                             | cell wall,mitochondrion                            | binding,transferase activity,catalytic activity |
| ug0039     | 898                  |                                                                                                                                            |                                                                                                                                                                                                                                 |                                                    |                                                 |
| ug0040_1   | 674                  | GO:0005739                                                                                                                                 |                                                                                                                                                                                                                                 | mitochondrion                                      |                                                 |
| ug0040_2   | 787                  |                                                                                                                                            |                                                                                                                                                                                                                                 |                                                    |                                                 |
| ug0041_1   | 761                  | GO:0000003,GO:0009791,GO:0003700,GO:0006350,GO:0016020,GO:0005622,GO:0005215,GO:0005739,GO:0006810,GO:0009058,GO:0006091,GO:0006139,GO:001 | reproduction,post-embryonic development,embryonic development,transcription transport,biosynthetic process,generation of precursor metabolites and energy,nucleobase, nucleoside, nucleotide and nucleic acid metabolic process |                                                    | transcription factor activity                   |
| ug0041_2   | 973                  | GO:0005739,GO:0006810,GO:0009058,GO:0006091,GO:0006139,GO:001                                                                              | metabolites and energy,nucleobase, nucleoside, nucleotide and nucleic acid metabolic process                                                                                                                                    | membrane,intracellular,mitochondrion               | transporter activity,hydrolase activity         |
| ug0042     | 991                  |                                                                                                                                            |                                                                                                                                                                                                                                 |                                                    |                                                 |
| ug0043     | 584                  | GO:0016740,GO:0005                                                                                                                         |                                                                                                                                                                                                                                 | mitochondrion                                      | transferase activity                            |
| ug0044     | 766                  | GO:0005622                                                                                                                                 |                                                                                                                                                                                                                                 | intracellular                                      |                                                 |
| ug0045_1   | 455                  | GO:0019538,GO:0009056,GO:0016787                                                                                                           | protein metabolic process,catabolic process                                                                                                                                                                                     |                                                    | hydrolase activity                              |

| Unigene ID | sequence length (bp) | GO-ID                                                                                                       | Biological process                                                                                                                                  | Cellular component                                 | Molecular function           |
|------------|----------------------|-------------------------------------------------------------------------------------------------------------|-----------------------------------------------------------------------------------------------------------------------------------------------------|----------------------------------------------------|------------------------------|
| ug0045_2   | 845                  | GO:0009536,GO:0009987,GO:0016020                                                                            | cellular process                                                                                                                                    | plastid,membrane                                   |                              |
| ug0046     | 919                  | GO:0004872,GO:0005488,GO:0005737,GO:0009987,GO:0016020,GO:0005783,GO:000681                                 | cellular process,transport                                                                                                                          | cytoplasm,membrane,endoplasmic reticulum           | receptor activity,binding    |
| ug0047_1   | 946                  | GO:0009653,GO:0007275,GO:0009058,GO:0006139,GO:0009536,GO:0016740                                           | anatomical structure morphogenesis,multicellular organismal development,biosynthetic process,nucleobase, nucleoside, nucleotide and nucleic acid    | plastid                                            | transferase activity         |
| ug0047_2   | 714                  | GO:0006810,GO:0009058,GO:0006091,GO:0006139,GO:0016020,GO:0005215                                           | transport,biosynthetic process,generation of precursor metabolites and energy,nucleobase, nucleoside, nucleotide and nucleic acid metabolic process | membrane                                           | transporter activity         |
| ug0048_1   | 246                  | GO:0005622,GO:0003677,GO:0016043,GO:0009987,GO:0009536,GO:00053                                             | cellular component organization,cellular process                                                                                                    | intracellular,plastid,nucleus                      | DNA binding                  |
| ug0048_2   | 397                  | GO:0005739                                                                                                  |                                                                                                                                                     | mitochondrion                                      |                              |
| ug0049_1   | 504                  | GO:0005488                                                                                                  |                                                                                                                                                     |                                                    | binding                      |
| ug0049_2   | 386                  | GO:0005737,GO:0006139,GO:0005515,GO:0009987,GO:0005634                                                      | nucleobase, nucleoside, nucleotide and nucleic acid metabolic process,flower development                                                            | cytoplasm,nucleus                                  | protein binding              |
| ug0050     | 381                  | GO:0005198,GO:0005886,GO:0005840,GO:0005829,GO:0009536,GO:000641                                            | translation                                                                                                                                         | plasma membrane,cell wall,ribosome,cytosol,plastid | structural molecule activity |
| ug0051     | 501                  | GO:0006950                                                                                                  | response to stress                                                                                                                                  |                                                    |                              |
| ug0052     | 535                  | GO:0016020,GO:0009987,GO:0009536,GO:0006810,GO:000987,GO:0005886,GO:0016020,GO:0005773,GO:0016043,GO:000695 | transport,cellular process,cellular component organization,response to stress,response to abiotic stimulus                                          | plasma membrane,membrane,vacuole                   |                              |
| ug0053     | 313                  | GO:0005488,GO:0003824,GO:0008152,GO:0009058,GO:0009987,GO:0009536,GO:001597                                 | metabolic process,biosynthetic process,cellular process,photosynthesis                                                                              | plastid                                            | binding,catalytic activity   |
| ug0054     | 404                  | GO:0040007,GO:0005623,GO:0016043                                                                            | growth,cellular component organization                                                                                                              | cell                                               |                              |
| ug0055_1   | 168                  | GO:0016020,GO:0009987,GO:0009536,GO:0006810,GO:000987,GO:0005886,GO:0016020,GO:0005773,GO:0016043,GO:000695 | transport,cellular process,cellular component organization,response to stress,response to abiotic stimulus                                          | plasma membrane,membrane,vacuole                   |                              |
| ug0055_2   | 660                  | GO:0005488,GO:0003824,GO:0008152,GO:0009058,GO:0009987,GO:0009536,GO:001597                                 | metabolic process,biosynthetic process,cellular process,photosynthesis                                                                              | plastid                                            | binding,catalytic activity   |
| ug0056     | 419                  | GO:0040007,GO:0005623,GO:0016043                                                                            | growth,cellular component organization                                                                                                              | cell                                               |                              |
| ug0057     | 342                  | GO:0016020,GO:0009987,GO:0009536,GO:0006810,GO:000987,GO:0005886,GO:0016020,GO:0005773,GO:0016043,GO:000695 | transport,cellular process,cellular component organization,response to stress,response to abiotic stimulus                                          | plasma membrane,membrane,vacuole                   |                              |
| ug0058     | 960                  | GO:0005488,GO:0003824,GO:0008152,GO:0009058,GO:0009987,GO:0009536,GO:001597                                 | metabolic process,biosynthetic process,cellular process,photosynthesis                                                                              | plastid                                            | binding,catalytic activity   |
| ug0059     | 627                  | GO:0040007,GO:0005623,GO:0016043                                                                            | growth,cellular component organization                                                                                                              | cell                                               |                              |
| ug0060     | 592                  | GO:0016020,GO:0009987,GO:0009536,GO:0006810,GO:000987,GO:0005886,GO:0016020,GO:0005773,GO:0016043,GO:000695 | transport,cellular process,cellular component organization,response to stress,response to abiotic stimulus                                          | plasma membrane,membrane,vacuole                   |                              |
| ug0061     | 849                  | GO:0005488,GO:0003824,GO:0008152,GO:0009058,GO:0009987,GO:0009536,GO:001597                                 | metabolic process,biosynthetic process,cellular process,photosynthesis                                                                              | plastid                                            | binding,catalytic activity   |
| ug0062     | 583                  | GO:0040007,GO:0005623,GO:0016043                                                                            | growth,cellular component organization                                                                                                              | cell                                               |                              |
| ug0063     | 537                  | GO:0016020,GO:0009987,GO:0009536,GO:0006810,GO:000987,GO:0005886,GO:0016020,GO:0005773,GO:0016043,GO:000695 | transport,cellular process,cellular component organization,response to stress,response to abiotic stimulus                                          | plasma membrane,membrane,vacuole                   |                              |
| ug0064     | 994                  | GO:0005488,GO:0003824,GO:0008152,GO:0009058,GO:0009987,GO:0009536,GO:001597                                 | metabolic process,biosynthetic process,cellular process,photosynthesis                                                                              | plastid                                            | binding,catalytic activity   |
| ug0065     | 734                  | GO:0040007,GO:0005623,GO:0016043                                                                            | growth,cellular component organization                                                                                                              | cell                                               |                              |
| ug0066_1   | 644                  | GO:0016020,GO:0009987,GO:0009536,GO:0006810,GO:000987,GO:0005886,GO:0016020,GO:0005773,GO:0016043,GO:000695 | transport,cellular process,cellular component organization,response to stress,response to abiotic stimulus                                          | plasma membrane,membrane,vacuole                   |                              |
| ug0066_2   | 848                  | GO:0005488,GO:0003824,GO:0008152,GO:0009058,GO:0009987,GO:0009536,GO:001597                                 | metabolic process,biosynthetic process,cellular process,photosynthesis                                                                              | plastid                                            | binding,catalytic activity   |
| ug0067     | 511                  | GO:0040007,GO:0005623,GO:0016043                                                                            | growth,cellular component organization                                                                                                              | cell                                               |                              |
| ug0068_1   | 939                  | GO:0016020,GO:0009987,GO:0009536,GO:0006810,GO:000987,GO:0005886,GO:0016020,GO:0005773,GO:0016043,GO:000695 | transport,cellular process,cellular component organization,response to stress,response to abiotic stimulus                                          | plasma membrane,membrane,vacuole                   |                              |
| ug0068_2   | 842                  | GO:0005488,GO:0003824,GO:0008152,GO:0009058,GO:0009987,GO:0009536,GO:001597                                 | metabolic process,biosynthetic process,cellular process,photosynthesis                                                                              | plastid                                            | binding,catalytic activity   |
| ug0069     | 796                  | GO:0040007,GO:0005623,GO:0016043                                                                            | growth,cellular component organization                                                                                                              | cell                                               |                              |
| ug0070_1   | 401                  | GO:0016020,GO:0009987,GO:0009536,GO:0006810,GO:000987,GO:0005886,GO:0016020,GO:0005773,GO:0016043,GO:000695 | transport,cellular process,cellular component organization,response to stress,response to abiotic stimulus                                          | plasma membrane,membrane,vacuole                   |                              |
| ug0070_2   | 909                  | GO:0005488,GO:0003824,GO:0008152,GO:0009058,GO:0009987,GO:0009536,GO:001597                                 | metabolic process,biosynthetic process,cellular process,photosynthesis                                                                              | plastid                                            | binding,catalytic activity   |
| ug0071     | 595                  | GO:0040007,GO:0005623,GO:0016043                                                                            | growth,cellular component organization                                                                                                              | cell                                               |                              |
| ug0072     | 773                  | GO:0016020,GO:0009987,GO:0009536,GO:0006810,GO:000987,GO:0005886,GO:0016020,GO:0005773,GO:0016043,GO:000695 | transport,cellular process,cellular component organization,response to stress,response to abiotic stimulus                                          | plasma membrane,membrane,vacuole                   |                              |
| ug0073     | 924                  | GO:0005488,GO:0003824,GO:0008152,GO:0009058,GO:0009987,GO:0009536,GO:001597                                 | metabolic process,biosynthetic process,cellular process,photosynthesis                                                                              | plastid                                            | binding,catalytic activity   |
| ug0074     | 340                  | GO:0040007,GO:0005623,GO:0016043                                                                            | growth,cellular component organization                                                                                                              | cell                                               |                              |
| ug0075     | 869                  | GO:0016020,GO:0009987,GO:0009536,GO:0006810,GO:000987,GO:0005886,GO:0016020,GO:0005773,GO:0016043,GO:000695 | transport,cellular process,cellular component organization,response to stress,response to abiotic stimulus                                          | plasma membrane,membrane,vacuole                   |                              |
| ug0076     | 560                  | GO:0005488,GO:0003824,GO:0008152,GO:0009058,GO:0009987,GO:0009536,GO:001597                                 | metabolic process,biosynthetic process,cellular process,photosynthesis                                                                              | plastid                                            | binding,catalytic activity   |
| ug0077     | 749                  | GO:0040007,GO:0005623,GO:0016043                                                                            | growth,cellular component organization                                                                                                              | cell                                               |                              |
| ug0078     | 716                  | GO:0016020,GO:0009987,GO:0009536,GO:0006810,GO:000987,GO:0005886,GO:0016020,GO:0005773,GO:0016043,GO:000695 | transport,cellular process,cellular component organization,response to stress,response to abiotic stimulus                                          | plasma membrane,membrane,vacuole                   |                              |
| ug0079     | 621                  | GO:0005488,GO:0003824,GO:0008152,GO:0009058,GO:0009987,GO:0009536,GO:001597                                 | metabolic process,biosynthetic process,cellular process,photosynthesis                                                                              | plastid                                            | binding,catalytic activity   |
| ug0080     | 620                  | GO:0040007,GO:0005623,GO:0016043                                                                            | growth,cellular component organization                                                                                                              | cell                                               |                              |
| ug0081     | 210                  | GO:0016020,GO:0009987,GO:0009536,GO:0006810,GO:000987,GO:0005886,GO:0016020,GO:0005773,GO:0016043,GO:000695 | transport,cellular process,cellular component organization,response to stress,response to abiotic stimulus                                          | plasma membrane,membrane,vacuole                   |                              |
| ug0082     | 865                  | GO:0005488,GO:0003824,GO:0008152,GO:0009058,GO:0009987,GO:0009536,GO:001597                                 | metabolic process,biosynthetic process,cellular process,photosynthesis                                                                              | plastid                                            | binding,catalytic activity   |

| Unigene ID | sequence length (bp) | GO-ID                                                                       | Biological process                                                                   | Cellular component                  | Molecular function                                                       |
|------------|----------------------|-----------------------------------------------------------------------------|--------------------------------------------------------------------------------------|-------------------------------------|--------------------------------------------------------------------------|
| ug0083     | 612                  |                                                                             |                                                                                      |                                     |                                                                          |
| ug0084     | 1094                 | GO:0019538,GO:0009056                                                       | protein metabolic process,catabolic process                                          |                                     |                                                                          |
| ug0085     | 144                  |                                                                             |                                                                                      |                                     |                                                                          |
| ug0086     | 960                  | GO:0005829,GO:0005737                                                       |                                                                                      | cytosol,cellular_component          |                                                                          |
| ug0087     | 718                  |                                                                             |                                                                                      |                                     |                                                                          |
| ug0088     | 616                  |                                                                             |                                                                                      |                                     |                                                                          |
| ug0089     | 412                  |                                                                             |                                                                                      |                                     |                                                                          |
| ug0090     | 290                  |                                                                             |                                                                                      |                                     |                                                                          |
| ug0091_1   | 587                  | GO:0003677,GO:000515,GO:0005634,GO:0005488,GO:0006350                       | transcription                                                                        | nucleus                             | DNA binding,protein binding,binding                                      |
| ug0091_2   | 813                  | GO:0009058,GO:0005975,GO:0016740                                            | biosynthetic process,carbohydrate metabolic process                                  |                                     | transferase activity                                                     |
| ug0092     | 207                  | GO:0006810,GO:000987,GO:0005737,GO:0005488,GO:0005794                       | transport,cellular process                                                           | cytoplasm,Golgi apparatus           | binding                                                                  |
| ug0093     | 766                  |                                                                             |                                                                                      |                                     |                                                                          |
| ug0094     | 807                  | GO:0005515,GO:0016807                                                       |                                                                                      |                                     | protein binding,kinase translation factor activity, nucleic acid binding |
| ug0095     | 895                  | GO:0008135,GO:0005737,GO:0006412                                            | translation                                                                          | cytoplasm                           |                                                                          |
| ug0096     | 1075                 | GO:0005623,GO:0005623                                                       |                                                                                      | cell,cytoplasm                      |                                                                          |
| ug0097     | 906                  | GO:0006810,GO:0005623,GO:0016020                                            | transport                                                                            | cell,membrane                       |                                                                          |
| ug0098     | 754                  | GO:0005622,GO:0016327                                                       |                                                                                      | intracellular,membrane              |                                                                          |
| ug0099_1   | 327                  |                                                                             |                                                                                      |                                     |                                                                          |
| ug0099_2   | 865                  | GO:0000166,GO:0006777                                                       | response to stress                                                                   |                                     | nucleotide binding                                                       |
| ug0100_1   | 777                  | GO:0005623                                                                  |                                                                                      | cell                                |                                                                          |
| ug0100_2   | 774                  |                                                                             |                                                                                      |                                     |                                                                          |
| ug0101     | 859                  | GO:0005886                                                                  |                                                                                      | plasma membrane                     |                                                                          |
| ug0102_1   | 318                  |                                                                             |                                                                                      |                                     |                                                                          |
| ug0102_2   | 943                  | GO:0006950,GO:0006350,GO:0003700,GO:0005634,GO:0009719,GO:0007165           | response to stress,transcription,response to endogenous stimulus,signal transduction | nucleus                             | transcription factor activity                                            |
| ug0103     | 407                  |                                                                             |                                                                                      |                                     |                                                                          |
| ug0104     | 785                  |                                                                             |                                                                                      |                                     |                                                                          |
| ug0105     | 450                  |                                                                             |                                                                                      |                                     |                                                                          |
| ug0106     | 896                  | GO:0005215,GO:0016020,GO:0006810                                            | transport                                                                            | membrane                            | transporter activity                                                     |
| ug0107     | 612                  |                                                                             |                                                                                      |                                     |                                                                          |
| ug0108     | 795                  |                                                                             |                                                                                      |                                     |                                                                          |
| ug0109     | 1035                 | GO:0005783,GO:0000003,GO:0009791,GO:0000000                                 | reproduction,post-embryonic development,embryonic                                    | endoplasmic reticulum               |                                                                          |
| ug0110     | 838                  | GO:0003676,GO:0000166                                                       |                                                                                      |                                     | nucleic acid binding,nucleotide binding                                  |
| ug0111     | 403                  |                                                                             |                                                                                      |                                     |                                                                          |
| ug0112_1   | 340                  |                                                                             |                                                                                      |                                     |                                                                          |
| ug0112_2   | 866                  | GO:0006810,GO:0009058,GO:0003723,GO:000515,GO:0005654,GO:0006139,GO:0000166 | transport,cellular process                                                           | nucleoplasm                         | RNA binding,protein binding,nucleotide binding                           |
| ug0113     | 667                  | GO:0006810,GO:0009058,GO:0003723,GO:000515,GO:0005654,GO:0006139,GO:0000166 | nucleobase, nucleoside, nucleotide and nucleic acid metabolic process                | nucleoplasm                         | RNA binding,protein binding,nucleotide binding                           |
| ug0114     | 481                  |                                                                             |                                                                                      |                                     |                                                                          |
| ug0115     | 549                  | GO:0003677,GO:0006350,GO:0005634                                            | transcription                                                                        | nucleus                             | DNA binding                                                              |
| ug0116     | 291                  |                                                                             |                                                                                      |                                     |                                                                          |
| ug0117     | 782                  | GO:0006464,GO:0016301,GO:0000166                                            | protein modification process                                                         |                                     | kinase activity,nucleotide binding                                       |
| ug0118     | 518                  | GO:0004871,GO:0007165,GO:0005488,GO:0006629,GO:0016787                      | signal transduction,lipid metabolic process                                          |                                     | signal transducer activity,binding,hydrolase activity                    |
| ug0119     | 899                  | GO:0005783,GO:0000166,GO:0006950                                            | response to stress                                                                   | endoplasmic reticulum               | nucleotide binding                                                       |
| ug0120     | 855                  |                                                                             |                                                                                      |                                     |                                                                          |
| ug0121     | 494                  | GO:0005515,GO:0006810,GO:0009987,GO:0005768,GO:0016020                      | transport,cellular process                                                           | endosome,membrane                   | protein binding                                                          |
| ug0122_1   | 974                  | GO:0005515                                                                  |                                                                                      |                                     | protein binding                                                          |
| ug0122_2   | 823                  |                                                                             |                                                                                      |                                     |                                                                          |
| ug0123     | 855                  | GO:0005886                                                                  |                                                                                      | plasma membrane                     |                                                                          |
| ug0124     | 942                  | GO:0009719,GO:0006950,GO:0009628                                            | response to endogenous stimulus,response to stress,response to abiotic stimulus      |                                     |                                                                          |
| ug0125     | 895                  | GO:0016020,GO:0005783,GO:0005623,GO:0005488,GO:0006810,G                    | transport,generation of precursor metabolites and energy                             | membrane,endoplasmic reticulum,cell | binding                                                                  |

| Unigene ID | sequence length (bp) | GO-ID                                                                                                                                                 | Biological process                                                                                                                                   | Cellular component                   | Molecular function                                                       |
|------------|----------------------|-------------------------------------------------------------------------------------------------------------------------------------------------------|------------------------------------------------------------------------------------------------------------------------------------------------------|--------------------------------------|--------------------------------------------------------------------------|
| ug0126     | 471                  | GO:0016787,GO:0003824,GO:0016301,GO:008152,GO:0009987,GO:0009058,GO:0006629,GO:0000166,GO:0005840,GO:0005198,GO:0006412                               | metabolic process,cellular process,biosynthetic process,lipid metabolic process,carbohydrate metabolic process                                       |                                      | hydrolase activity,catalytic activity,kinase activity,nucleotide binding |
| ug0127     | 629                  | GO:0016787,GO:0003824,GO:0016301,GO:008152,GO:0009987,GO:0009058,GO:0006629,GO:0000166,GO:0005840,GO:0005198,GO:0006412                               | translation                                                                                                                                          | ribosome                             | structural molecule activity                                             |
| ug0128     | 623                  | GO:0016787,GO:0003824,GO:0016301,GO:008152,GO:0009987,GO:0009058,GO:0006629,GO:0000166,GO:0005840,GO:0005198,GO:0006412                               | metabolic process,cellular process,biosynthetic process,lipid metabolic process,carbohydrate metabolic process                                       |                                      | hydrolase activity,catalytic activity,kinase activity,nucleotide binding |
| ug0129_1   | 813                  | GO:0006810,GO:0000166,GO:0007165                                                                                                                      | transport,signal transduction                                                                                                                        |                                      | nucleotide binding                                                       |
| ug0129_2   | 525                  |                                                                                                                                                       |                                                                                                                                                      |                                      |                                                                          |
| ug0130     | 897                  |                                                                                                                                                       |                                                                                                                                                      |                                      |                                                                          |
| ug0131     | 560                  | GO:0006464,GO:0019538,GO:0009056,GO:009987,GO:0003677,GO:0006950,GO:000625                                                                            | protein modification process,protein metabolic process,catabolic process,cellular process,response to stress,DNA                                     | nucleus                              | DNA binding                                                              |
| ug0132     | 907                  |                                                                                                                                                       |                                                                                                                                                      |                                      |                                                                          |
| ug0133     | 614                  | GO:0005777                                                                                                                                            |                                                                                                                                                      | peroxisome                           |                                                                          |
| ug0134     | 425                  |                                                                                                                                                       |                                                                                                                                                      |                                      |                                                                          |
| ug0135     | 745                  | GO:0016020,GO:0009058,GO:0016787,GO:0003677                                                                                                           | response to biotic stimulus                                                                                                                          | membrane                             | hydrolase activity,transporter activity                                  |
| ug0136     | 307                  |                                                                                                                                                       |                                                                                                                                                      |                                      |                                                                          |
| ug0137_1   | 471                  | GO:0003723,GO:0016740,GO:0009058,GO:0003677                                                                                                           | biosynthetic process,DNA metabolic process                                                                                                           |                                      | RNA binding,transferase activity                                         |
| ug0137_2   | 168                  |                                                                                                                                                       |                                                                                                                                                      |                                      |                                                                          |
| ug0138     | 528                  |                                                                                                                                                       |                                                                                                                                                      |                                      |                                                                          |
| ug0139     | 582                  |                                                                                                                                                       |                                                                                                                                                      |                                      |                                                                          |
| ug0140     | 437                  |                                                                                                                                                       |                                                                                                                                                      |                                      |                                                                          |
| ug0141     | 516                  | GO:0008152,GO:0003824,GO:0008150,GO:0005488,GO:000576,GO:0008152,GO:0006950,GO:0009056,GO:0009987,GO:000382                                           | metabolic process,biological_process                                                                                                                 |                                      | catalytic activity                                                       |
| ug0142     | 866                  | GO:0008152,GO:0003824,GO:0009056,GO:0009987,GO:000382                                                                                                 | metabolic process,response to stress,catabolic process,cellular process                                                                              | extracellular region                 | binding,catalytic activity,molecular_function                            |
| ug0143_1   | 791                  | GO:0005737,GO:0016740,GO:0009058,GO:0003677                                                                                                           |                                                                                                                                                      | cytoplasm                            | hydrolase activity                                                       |
| ug0143_2   | 624                  |                                                                                                                                                       |                                                                                                                                                      |                                      |                                                                          |
| ug0144     | 352                  |                                                                                                                                                       |                                                                                                                                                      |                                      |                                                                          |
| ug0145     | 836                  |                                                                                                                                                       |                                                                                                                                                      |                                      |                                                                          |
| ug0146     | 869                  | GO:0005488,GO:0008152,GO:0009987,GO:0003824,GO:0003674,GO:0005622,GO:0005840,GO:0016043,GO:0009987,GO:0003677,GO:0005198,GO:0003682,GO:0006412,GO:000 | metabolic process,cellular process                                                                                                                   | plastid                              | binding,catalytic activity,molecular_function                            |
| ug0147     | 936                  | GO:0009987,GO:0003677,GO:0005198,GO:0003682,GO:0006412,GO:000                                                                                         | cellular component organization,cellular process,translation                                                                                         | intracellular,ribosome,mitochondrion | DNA binding,structural molecule activity,chromatin binding               |
| ug0148     | 495                  |                                                                                                                                                       |                                                                                                                                                      |                                      |                                                                          |
| ug0149     | 381                  | GO:0016787                                                                                                                                            |                                                                                                                                                      |                                      | hydrolase activity                                                       |
| ug0150     | 826                  |                                                                                                                                                       |                                                                                                                                                      |                                      |                                                                          |
| ug0151     | 857                  | GO:0005737,GO:0009058,GO:0009653,GO:0016043,GO:0030154,GO:0016049,GO:0007275                                                                          | pollination,anatomical structure morphogenesis,cellular component organization,cell differentiation,cell growth,multicellular organismal development | cytoplasm                            |                                                                          |
| ug0152     | 915                  |                                                                                                                                                       |                                                                                                                                                      |                                      |                                                                          |
| ug0153     | 428                  |                                                                                                                                                       |                                                                                                                                                      |                                      |                                                                          |
| ug0154     | 504                  | GO:0016787,GO:0008152,GO:0003677,GO:0006350,GO:0009987                                                                                                | metabolic process                                                                                                                                    |                                      | hydrolase activity                                                       |
| ug0155     | 805                  | GO:0003677,GO:0006350,GO:0009987                                                                                                                      | transcription,cellular process                                                                                                                       |                                      | DNA binding                                                              |
| ug0156     | 489                  | GO:0005794,GO:0006950,GO:0009628                                                                                                                      | response to stress,response to abiotic stimulus                                                                                                      | Golgi apparatus                      |                                                                          |
| ug0157     | 839                  | GO:0005634,GO:0003824,GO:0003674                                                                                                                      |                                                                                                                                                      | nucleus                              | catalytic activity,molecular_function                                    |
| ug0158     | 524                  | GO:0019538,GO:0009987,GO:0005515                                                                                                                      | protein metabolic process,cellular process                                                                                                           |                                      | protein binding                                                          |
| ug0159_1   | 485                  |                                                                                                                                                       |                                                                                                                                                      |                                      |                                                                          |
| ug0159_2   | 737                  | GO:0005737,GO:0006412,GO:0008135,GO:0016020,GO:0005634                                                                                                | translation                                                                                                                                          | cytoplasm,membrane,nucleus           | translation factor activity, nucleic acid binding                        |
| ug0160     | 561                  |                                                                                                                                                       |                                                                                                                                                      |                                      |                                                                          |
| ug0161_1   | 481                  |                                                                                                                                                       |                                                                                                                                                      |                                      |                                                                          |
| ug0161_2   | 412                  |                                                                                                                                                       |                                                                                                                                                      |                                      |                                                                          |
| ug0162     | 719                  | GO:0005739,GO:0016020,GO:0005622                                                                                                                      |                                                                                                                                                      | mitochondrion,membrane,intracellular |                                                                          |
| ug0163_1   | 598                  |                                                                                                                                                       |                                                                                                                                                      |                                      |                                                                          |
| ug0163_2   | 568                  |                                                                                                                                                       |                                                                                                                                                      |                                      |                                                                          |

| Unigene ID | sequence length (bp) | GO-ID                                                                                                                               | Biological process                                                                                                                                                                               | Cellular component              | Molecular function                                             |
|------------|----------------------|-------------------------------------------------------------------------------------------------------------------------------------|--------------------------------------------------------------------------------------------------------------------------------------------------------------------------------------------------|---------------------------------|----------------------------------------------------------------|
| ug0164     | 910                  | GO:0005829,GO:0005622,GO:0019538,GO:0                                                                                               | protein metabolic process,catabolic process                                                                                                                                                      | cytosol,intracellular           |                                                                |
| ug0165     | 604                  |                                                                                                                                     |                                                                                                                                                                                                  |                                 |                                                                |
| ug0166     | 719                  | GO:0006810,GO:0005886,GO:0000166,GO:0                                                                                               | transport,signal transduction                                                                                                                                                                    | plasma membrane                 | nucleotide binding                                             |
| ug0167     | 341                  |                                                                                                                                     |                                                                                                                                                                                                  |                                 |                                                                |
| ug0168     | 190                  |                                                                                                                                     |                                                                                                                                                                                                  |                                 |                                                                |
| ug0169     | 501                  |                                                                                                                                     |                                                                                                                                                                                                  |                                 |                                                                |
| ug0170     | 948                  | GO:0005198,GO:0005840,GO:0016740,GO:0009536,GO:0006412,GO:0005886,GO:0009536,GO:0005773                                             | translation                                                                                                                                                                                      | ribosome,plastid                | structural molecule activity,transferase activity,RNA binding  |
| ug0171     | 669                  |                                                                                                                                     |                                                                                                                                                                                                  | plasma membrane,plastid,vacuole |                                                                |
| ug0172     | 203                  |                                                                                                                                     |                                                                                                                                                                                                  |                                 |                                                                |
| ug0173     | 598                  |                                                                                                                                     |                                                                                                                                                                                                  |                                 |                                                                |
| ug0174_1   | 791                  |                                                                                                                                     |                                                                                                                                                                                                  |                                 |                                                                |
| ug0174_2   | 193                  |                                                                                                                                     |                                                                                                                                                                                                  |                                 |                                                                |
| ug0175     | 360                  |                                                                                                                                     |                                                                                                                                                                                                  |                                 |                                                                |
| ug0176_1   | 509                  |                                                                                                                                     |                                                                                                                                                                                                  |                                 |                                                                |
| ug0176_2   | 1084                 |                                                                                                                                     |                                                                                                                                                                                                  |                                 |                                                                |
| ug0177_1   | 781                  |                                                                                                                                     |                                                                                                                                                                                                  |                                 |                                                                |
| ug0177_2   | 376                  |                                                                                                                                     |                                                                                                                                                                                                  |                                 |                                                                |
| ug0178_1   | 1028                 |                                                                                                                                     |                                                                                                                                                                                                  |                                 |                                                                |
| ug0178_2   | 605                  | GO:0016301,GO:0004871,GO:0006464,GO:0                                                                                               | protein modification process                                                                                                                                                                     |                                 | kinase activity,signal transducer activity,nucleotide          |
| ug0179     | 950                  |                                                                                                                                     |                                                                                                                                                                                                  |                                 |                                                                |
| ug0180_1   | 325                  |                                                                                                                                     |                                                                                                                                                                                                  |                                 |                                                                |
| ug0180_2   | 662                  |                                                                                                                                     |                                                                                                                                                                                                  |                                 |                                                                |
| ug0181     | 555                  |                                                                                                                                     |                                                                                                                                                                                                  |                                 |                                                                |
| ug0182     | 885                  |                                                                                                                                     |                                                                                                                                                                                                  |                                 |                                                                |
| ug0183     | 625                  |                                                                                                                                     |                                                                                                                                                                                                  |                                 |                                                                |
| ug0184     | 609                  |                                                                                                                                     |                                                                                                                                                                                                  |                                 |                                                                |
| ug0185     | 548                  |                                                                                                                                     |                                                                                                                                                                                                  |                                 |                                                                |
| ug0186     | 877                  | GO:0016301,GO:0009628,GO:0009605,GO:0007165,GO:0005515,GO:0006139,GO:0009058,GO:0009579,GO:000166,GO:0005488,GO:0009536,GO:0009719, | response to abiotic stimulus,response to external stimulus,signal transduction,nucleobase, nucleoside, nucleotide and nucleic acid metabolic process,biosynthetic process,response to endogenous | thylakoid,plastid,nucleus       | kinase activity,protein binding,nucleotide binding,binding     |
| ug0187     | 912                  |                                                                                                                                     |                                                                                                                                                                                                  |                                 |                                                                |
| ug0188     | 444                  | GO:0005576,GO:0006950,GO:0005618                                                                                                    | response to stress                                                                                                                                                                               | extracellular region,cell wall  |                                                                |
| ug0189     | 813                  | GO:0003676,GO:0000166                                                                                                               |                                                                                                                                                                                                  |                                 | nucleic acid binding,nucleotide binding                        |
| ug0190     | 730                  | GO:0009605,GO:0006950,GO:0006139,GO:0003676,GO:0005634,GO:0009607                                                                   | response to external stimulus,response to stress,nucleobase, nucleoside, nucleotide and nucleic acid                                                                                             | nucleus                         | nucleic acid binding                                           |
| ug0191     | 487                  |                                                                                                                                     |                                                                                                                                                                                                  |                                 |                                                                |
| ug0192     | 817                  | GO:0030528,GO:0003700,GO:0016043,GO:0006350,GO:0005634                                                                              | cellular component organization,transcription                                                                                                                                                    | nucleus                         | transcription regulator activity,transcription factor activity |
| ug0193     | 791                  | GO:0005623                                                                                                                          |                                                                                                                                                                                                  | cell                            |                                                                |
| ug0194     | 883                  | GO:0003824,GO:0000166,GO:0008152,GO:0                                                                                               | metabolic process,transcription                                                                                                                                                                  |                                 | catalytic activity,nucleotide binding                          |
| ug0195     | 890                  |                                                                                                                                     |                                                                                                                                                                                                  |                                 |                                                                |
| ug0196     | 705                  | GO:0003677                                                                                                                          |                                                                                                                                                                                                  |                                 | DNA binding                                                    |
| ug0197     | 103                  |                                                                                                                                     |                                                                                                                                                                                                  |                                 |                                                                |
| ug0198     | 182                  |                                                                                                                                     |                                                                                                                                                                                                  |                                 |                                                                |
| ug0199     | 1026                 | GO:0005515                                                                                                                          |                                                                                                                                                                                                  |                                 | protein binding                                                |
| ug0200     | 908                  | GO:0006629,GO:0016740,GO:0000166,GO:0006139,GO:0009058,GO:0008150,GO:0040007,GO:0006950,GO:0009628                                  | lipid metabolic process,nucleobase, nucleoside, nucleotide and nucleic acid metabolic process,biosynthetic process,biological_process,growth, response to stress,response to abiotic stimulus    |                                 | transferase activity,nucleotide binding                        |
| ug0201     | 522                  | GO:0005622                                                                                                                          |                                                                                                                                                                                                  | intracellular                   |                                                                |
| ug0202     | 613                  | GO:0005739                                                                                                                          |                                                                                                                                                                                                  | mitochondrion                   |                                                                |
| ug0203     | 316                  |                                                                                                                                     |                                                                                                                                                                                                  |                                 |                                                                |
| ug0204     | 848                  |                                                                                                                                     |                                                                                                                                                                                                  |                                 |                                                                |
| ug0205     | 393                  | GO:0005622,GO:0003677,GO:0016043,GO:0009987,GO:0005634                                                                              | cellular component organization,cellular process                                                                                                                                                 | intracellular,nucleus           | DNA binding                                                    |
| ug0206     | 699                  |                                                                                                                                     |                                                                                                                                                                                                  |                                 |                                                                |
| ug0207     | 526                  |                                                                                                                                     |                                                                                                                                                                                                  |                                 |                                                                |
| ug0208     | 276                  | GO:0003824,GO:0008                                                                                                                  | metabolic process                                                                                                                                                                                |                                 | catalytic activity                                             |
| ug0209     | 1008                 |                                                                                                                                     |                                                                                                                                                                                                  |                                 |                                                                |
| ug0210     | 524                  | GO:0005739,GO:0009                                                                                                                  |                                                                                                                                                                                                  | mitochondrion,plastid           |                                                                |

| Unigene ID | sequence length (bp) | GO-ID                                                                                                 | Biological process                                                                                                     | Cellular component         | Molecular function                                         |
|------------|----------------------|-------------------------------------------------------------------------------------------------------|------------------------------------------------------------------------------------------------------------------------|----------------------------|------------------------------------------------------------|
| ug0211     | 909                  | GO:0005975,GO:0009056,GO:0016787,GO:000427                                                            | carbohydrate metabolic process,catabolic process                                                                       |                            | hydrolase activity,binding                                 |
| ug0212     | 427                  |                                                                                                       |                                                                                                                        |                            |                                                            |
| ug0213     | 911                  | GO:0016787,GO:0005634,GO:0006464                                                                      | protein modification process                                                                                           | nucleus                    | hydrolase activity                                         |
| ug0214     | 787                  | GO:0005488,GO:0003824,GO:0008152,GO:0009058,GO:0006519                                                | metabolic process,biosynthetic process,cellular amino acid and derivative metabolic process                            |                            | binding,catalytic activity                                 |
| ug0215     | 802                  | GO:0019538,GO:0003824,GO:0006464                                                                      | protein metabolic process,protein modification process                                                                 |                            | catalytic activity                                         |
| ug0216     | 535                  |                                                                                                       |                                                                                                                        |                            |                                                            |
| ug0217_1   | 898                  | GO:0003824,GO:0003674,GO:0008152,GO:0005488                                                           | metabolic process                                                                                                      |                            | catalytic activity,molecular_function,binding              |
| ug0217_2   | 896                  | GO:0005515                                                                                            |                                                                                                                        |                            | protein binding                                            |
| ug0218     | 780                  | GO:0009056,GO:0009987,GO:0006629,GO:0008152,GO:0003824,GO:0005777,GO:0009719,GO:0005634,GO:000421     | catabolic process,cellular process,lipid metabolic process,metabolic process,response to endogenous stimulus           | peroxisome,nucleus,cytosol | catalytic activity                                         |
| ug0219     | 421                  |                                                                                                       |                                                                                                                        |                            |                                                            |
| ug0220     | 731                  | GO:0003677                                                                                            |                                                                                                                        |                            | DNA binding                                                |
| ug0221     | 890                  | GO:0006950,GO:0009628,GO:0003824,GO:00008150,GO:0008152,GO:000000166,GO:0009530,GO:0005840,GO:0005427 | response to stress,response to abiotic stimulus,biological_process,metabolic process                                   | plastid,mitochondrion      | catalytic activity,nucleotide binding                      |
| ug0222     | 427                  | GO:0009536,GO:0006412,GO:0003723                                                                      | translation                                                                                                            | ribosome,plastid           | structural molecule activity,RNA binding                   |
| ug0223     | 486                  | GO:0016787                                                                                            |                                                                                                                        |                            | hydrolase activity                                         |
| ug0224     | 1350                 |                                                                                                       |                                                                                                                        |                            |                                                            |
| ug0225     | 675                  |                                                                                                       |                                                                                                                        |                            |                                                            |
| ug0226     | 543                  | GO:0005488,GO:0003824,GO:0003674,GO:0006950,GO:0016740,GO:0016582                                     | metabolic process,response to stress                                                                                   |                            | binding,catalytic activity,molecular_function              |
| ug0227     | 582                  | GO:0008152,GO:0009987,GO:0000166                                                                      | metabolic process,cellular process                                                                                     |                            | transferase activity,kinase activity,nucleotide binding    |
| ug0228     | 546                  | GO:0005515                                                                                            |                                                                                                                        |                            | protein binding                                            |
| ug0229     | 996                  | GO:0005730,GO:0016787,GO:0003676,GO:0008150,GO:0005618,GO:000139                                      | biological_process                                                                                                     | nucleolus,cell wall        | hydrolase activity,nucleic acid binding,nucleotide binding |
| ug0230     | 139                  |                                                                                                       |                                                                                                                        |                            |                                                            |
| ug0231     | 387                  |                                                                                                       |                                                                                                                        |                            |                                                            |
| ug0232     | 721                  |                                                                                                       |                                                                                                                        |                            |                                                            |
| ug0233     | 851                  |                                                                                                       |                                                                                                                        |                            |                                                            |
| ug0234     | 691                  |                                                                                                       |                                                                                                                        |                            |                                                            |
| ug0235     | 780                  |                                                                                                       |                                                                                                                        |                            |                                                            |
| ug0236     | 458                  |                                                                                                       |                                                                                                                        |                            |                                                            |
| ug0237     | 836                  | GO:0008150                                                                                            | biological_process                                                                                                     |                            |                                                            |
| ug0238_1   | 484                  |                                                                                                       |                                                                                                                        |                            |                                                            |
| ug0238_2   | 684                  | GO:0016043,GO:0009987,GO:0019538,GO:0005515,GO:0005829,GO:0019538,GO:0009056                          | cellular component organization,cellular process,protein metabolic process,protein metabolic process,catabolic process | cytosol                    | protein binding                                            |
| ug0239_1   | 517                  |                                                                                                       |                                                                                                                        |                            |                                                            |
| ug0239_2   | 568                  |                                                                                                       |                                                                                                                        |                            |                                                            |
| ug0240     | 328                  |                                                                                                       |                                                                                                                        |                            |                                                            |
| ug0241     | 424                  |                                                                                                       |                                                                                                                        |                            |                                                            |
| ug0242     | 120                  |                                                                                                       |                                                                                                                        |                            |                                                            |
| ug0243     | 432                  |                                                                                                       |                                                                                                                        |                            |                                                            |
| ug0244     | 623                  |                                                                                                       |                                                                                                                        |                            |                                                            |
| ug0245     | 682                  | GO:0005623                                                                                            |                                                                                                                        | cell                       |                                                            |
| ug0246     | 488                  | GO:0005739                                                                                            |                                                                                                                        | mitochondrion              |                                                            |
| ug0247_1   | 612                  | GO:0005488,GO:0003824                                                                                 | metabolic process                                                                                                      |                            | binding,catalytic activity                                 |
| ug0247_2   | 940                  |                                                                                                       |                                                                                                                        |                            |                                                            |
| ug0248     | 777                  |                                                                                                       |                                                                                                                        |                            |                                                            |
| ug0249     | 498                  | GO:0030528,GO:0006777                                                                                 | transcription                                                                                                          |                            | transcription regulator                                    |
| ug0250     | 879                  | GO:0005623,GO:0005975,GO:0003824                                                                      | carbohydrate metabolic process                                                                                         | cell                       | catalytic activity                                         |
| ug0251     | 428                  |                                                                                                       |                                                                                                                        |                            |                                                            |
| ug0252_1   | 766                  | GO:0009536,GO:0005975                                                                                 |                                                                                                                        | plastid                    | protein binding                                            |
| ug0252_2   | 941                  | GO:0016740,GO:0003824                                                                                 | metabolic process                                                                                                      |                            | transferase activity                                       |

| Unigene ID | sequence length (bp) | GO-ID                | Biological process                    | Cellular component              | Molecular function            |
|------------|----------------------|----------------------|---------------------------------------|---------------------------------|-------------------------------|
| ug0253     | 771                  | GO:0005737,GO:0009   | biosynthetic process,carbohydrate     | cytoplasm                       | catalytic activity            |
|            |                      | 058,GO:0005975,GO:0  | metabolic process,cellular            |                                 |                               |
|            |                      | 009987,GO:0006629,G  | process,lipid metabolic               |                                 |                               |
|            |                      | O:0003824,GO:000613  | process,nucleobase, nucleoside,       |                                 |                               |
| ug0254     | 917                  | 9,GO:0009056,GO:001  | nucleotide and nucleic acid           | intracellular,cytosol           | RNA binding,translation       |
|            |                      | 9748,GO:0006091      | metabolic process,catabolic           |                                 |                               |
|            |                      | GO:0006950,GO:0009   | process,secondary metabolic           |                                 |                               |
|            |                      | 607,GO:0005622,GO:0  | process,generation of precursor       |                                 |                               |
| ug0255     | 789                  | GO:000166,GO:0005    | response to stress,response to biotic | nucleus                         | factor activity, nucleic acid |
|            |                      | 515,GO:0006810,GO:0  | stimulus,protein metabolic            |                                 |                               |
|            |                      | 009987,GO:0007165,G  | process,catabolic process,cellular    |                                 |                               |
|            |                      | O:0005634,GO:001678  | process                               |                                 |                               |
| ug0256     | 888                  | GO:0009628,GO:0009   | response to abiotic                   | nucleus                         | nucleotide binding,protein    |
|            |                      | 606,GO:0000166,GO:0  | stimulus,tropism,post-embryonic       |                                 |                               |
|            |                      | 009791,GO:0000003,G  | development,reproduction,anatomical   |                                 |                               |
|            |                      | O:0009653,GO:000551  | cal structure                         |                                 |                               |
| ug0257     | 357                  | 5,GO:0009719,GO:000  | morphogenesis,response to             | nucleus                         | binding,transcription factor  |
|            |                      | 3700,GO:0006950,GO:  | endogenous stimulus,response to       |                                 |                               |
|            |                      | GO:0016301,GO:0005   | generation of precursor metabolites   |                                 |                               |
|            |                      | 829,GO:0000166,GO:0  | and energy,carbohydrate metabolic     |                                 |                               |
| ug0258     | 949                  | 006091,GO:0005975,G  | process,catabolic process             | cytosol                         | kinase activity,nucleotide    |
|            |                      | 569                  | carbohydrate metabolic process        |                                 |                               |
|            |                      | 459                  | GO:0005975,GO:0016                    |                                 |                               |
|            |                      | 429                  | 753                                   |                                 |                               |
| ug0259     | 576                  | GO:0005515,GO:0007   | multicellular organismal              | mitochondrion,plastid,nucleus   | protein binding,transcription |
|            |                      | 275,GO:0005739,GO:0  | development,cell                      |                                 |                               |
|            |                      | 008219,GO:0009536,G  | death,transcription                   |                                 |                               |
|            |                      | O:0003700,GO:000635  |                                       |                                 |                               |
| ug0260     | 774                  | GO:0006139,GO:0003   | nucleobase, nucleoside, nucleotide    | plastid                         | RNA binding                   |
|            |                      | 723,GO:0009536       | and nucleic acid metabolic process    |                                 |                               |
|            |                      | GO:0005622,GO:0006   |                                       |                                 |                               |
|            |                      | 350,GO:0016020,GO:0  | transcription                         |                                 |                               |
| ug0261     | 569                  | 003700,GO:0005488    |                                       | intracellular,membrane          | transcription factor          |
|            |                      | GO:0009987,GO:0005   |                                       |                                 |                               |
|            |                      | 575,GO:0000166,GO:0  | cellular process,cellular component   |                                 |                               |
|            |                      | 016043,GO:0005198,G  | organization                          |                                 |                               |
| ug0262     | 429                  | O:0016787,GO:000585  |                                       | cellular_component,cytoskeleton | nucleotide binding,structural |
|            |                      | GO:0005198,GO:0009   |                                       |                                 |                               |
|            |                      | 987,GO:0005575,GO:0  | cellular process,response to          |                                 |                               |
|            |                      | 006950,GO:0009628,G  | stress,response to abiotic            |                                 |                               |
| ug0263_1   | 429                  | O:0000166,GO:001604  | stimulus,cellular component           | cellular_component,cytoskeleton | structural molecule           |
|            |                      | 3,GO:0016787,GO:000  | organization                          |                                 |                               |
|            |                      | GO:0003676,GO:0000   |                                       |                                 |                               |
|            |                      | 166                  |                                       |                                 |                               |
| ug0263_2   | 753                  | GO:0005515           |                                       | nucleus                         | nucleic acid                  |
|            |                      | GO:0030528,GO:0006   | transcription                         |                                 |                               |
|            |                      | 350,GO:0005634       |                                       |                                 |                               |
|            |                      | 203                  |                                       |                                 |                               |
| ug0264_1   | 860                  | GO:0006810,GO:0009   | transport,cellular process            | vacuole,membrane                | hydrolase activity,nucleotide |
|            |                      | 987,GO:0005773,GO:0  |                                       |                                 |                               |
|            |                      | 016020,GO:0016787,G  |                                       |                                 |                               |
|            |                      | O:0000166,GO:000521  |                                       |                                 |                               |
| ug0264_2   | 810                  | GO:0030528,GO:0006   | transcription                         | nucleus                         | transcription regulator       |
|            |                      | 350,GO:0005634       |                                       |                                 |                               |
|            |                      | GO:0005488,GO:0016   | generation of precursor metabolites   |                                 |                               |
|            |                      | 020,GO:0006091,GO:0  | and energy,photosynthesis             |                                 |                               |
| ug0265     | 636                  | 015979,GO:0009536,G  |                                       | membrane,plastid,thylakoid      | binding                       |
|            |                      | 421                  |                                       |                                 |                               |
|            |                      | 768                  |                                       |                                 |                               |
|            |                      | GO:0016740,GO:0005   | biosynthetic process,cellular         |                                 |                               |
| ug0266_1   | 900                  | 737,GO:0009058,GO:0  | process,lipid metabolic process       | cytoplasm                       | transferase activity          |
|            |                      | 009987,GO:0006629    |                                       |                                 |                               |
|            |                      | 226                  |                                       |                                 |                               |
|            |                      | GO:0016020           |                                       |                                 |                               |
| ug0266_2   | 903                  | GO:0005739,GO:0009   |                                       | membrane                        | mitochondrion,plastid         |
|            |                      | GO:0005622,GO:0019   |                                       |                                 |                               |
|            |                      | 538,GO:0009056,GO:0  | protein metabolic process,catabolic   |                                 |                               |
|            |                      | 009987,GO:0005634,G  | process,cellular process              |                                 |                               |
| ug0267     | 574                  | O:0005829,GO:001678  |                                       | intracellular,nucleus,cytosol   | hydrolase activity            |
|            |                      | GO:0005829,GO:001678 |                                       |                                 |                               |
|            |                      | GO:0005829,GO:001678 |                                       |                                 |                               |
|            |                      | GO:0005829,GO:001678 |                                       |                                 |                               |
| ug0268     | 668                  | GO:0005829,GO:001678 |                                       | intracellular,nucleus,cytosol   | hydrolase activity            |
|            |                      | GO:0005829,GO:001678 |                                       |                                 |                               |
|            |                      | GO:0005829,GO:001678 |                                       |                                 |                               |
|            |                      | GO:0005829,GO:001678 |                                       |                                 |                               |
| ug0269     | 559                  | GO:0005829,GO:001678 |                                       | intracellular,nucleus,cytosol   | hydrolase activity            |
|            |                      | GO:0005829,GO:001678 |                                       |                                 |                               |
|            |                      | GO:0005829,GO:001678 |                                       |                                 |                               |
|            |                      | GO:0005829,GO:001678 |                                       |                                 |                               |
| ug0270     | 435                  | GO:0005829,GO:001678 |                                       | intracellular,nucleus,cytosol   | hydrolase activity            |
|            |                      | GO:0005829,GO:001678 |                                       |                                 |                               |
|            |                      | GO:0005829,GO:001678 |                                       |                                 |                               |
|            |                      | GO:0005829,GO:001678 |                                       |                                 |                               |
| ug0271     | 203                  | GO:0005829,GO:001678 |                                       | intracellular,nucleus,cytosol   | hydrolase activity            |
|            |                      | GO:0005829,GO:001678 |                                       |                                 |                               |
|            |                      | GO:0005829,GO:001678 |                                       |                                 |                               |
|            |                      | GO:0005829,GO:001678 |                                       |                                 |                               |
| ug0272     | 644                  | GO:0005829,GO:001678 |                                       | intracellular,nucleus,cytosol   | hydrolase activity            |
|            |                      | GO:0005829,GO:001678 |                                       |                                 |                               |
|            |                      | GO:0005829,GO:001678 |                                       |                                 |                               |
|            |                      | GO:0005829,GO:001678 |                                       |                                 |                               |
| ug0273     | 428                  | GO:0005829,GO:001678 |                                       | intracellular,nucleus,cytosol   | hydrolase activity            |
|            |                      | GO:0005829,GO:001678 |                                       |                                 |                               |
|            |                      | GO:0005829,GO:001678 |                                       |                                 |                               |
|            |                      | GO:0005829,GO:001678 |                                       |                                 |                               |
| ug0274_1   | 615                  | GO:0005829,GO:001678 |                                       | intracellular,nucleus,cytosol   | hydrolase activity            |
|            |                      | GO:0005829,GO:001678 |                                       |                                 |                               |
|            |                      | GO:0005829,GO:001678 |                                       |                                 |                               |
|            |                      | GO:0005829,GO:001678 |                                       |                                 |                               |
| ug0274_2   | 897                  | GO:0005829,GO:001678 |                                       | intracellular,nucleus,cytosol   | hydrolase activity            |
|            |                      | GO:0005829,GO:001678 |                                       |                                 |                               |
|            |                      | GO:0005829,GO:001678 |                                       |                                 |                               |
|            |                      | GO:0005829,GO:001678 |                                       |                                 |                               |
| ug0275_1   | 421                  | GO:0005829,GO:001678 |                                       | intracellular,nucleus,cytosol   | hydrolase activity            |
|            |                      | GO:0005829,GO:001678 |                                       |                                 |                               |
|            |                      | GO:0005829,GO:001678 |                                       |                                 |                               |
|            |                      | GO:0005829,GO:001678 |                                       |                                 |                               |
| ug0275_2   | 768                  | GO:0005829,GO:001678 |                                       | intracellular,nucleus,cytosol   | hydrolase activity            |
|            |                      | GO:0005829,GO:001678 |                                       |                                 |                               |
|            |                      | GO:0005829,GO:001678 |                                       |                                 |                               |
|            |                      | GO:0005829,GO:001678 |                                       |                                 |                               |
| ug0276     | 1040                 | GO:0005829,GO:001678 |                                       | intracellular,nucleus,cytosol   | hydrolase activity            |
|            |                      | GO:0005829,GO:001678 |                                       |                                 |                               |
|            |                      | GO:0005829,GO:001678 |                                       |                                 |                               |
|            |                      | GO:0005829,GO:001678 |                                       |                                 |                               |
| ug0277     | 226                  | GO:0005829,GO:001678 |                                       | intracellular,nucleus,cytosol   | hydrolase activity            |
|            |                      | GO:0005829,GO:001678 |                                       |                                 |                               |
|            |                      | GO:0005829,GO:001678 |                                       |                                 |                               |
|            |                      | GO:0005829,GO:001678 |                                       |                                 |                               |
| ug0278     | 666                  | GO:0005829,GO:001678 |                                       | intracellular,nucleus,cytosol   | hydrolase activity            |
|            |                      | GO:0005829,GO:001678 |                                       |                                 |                               |
|            |                      | GO:0005829,GO:001678 |                                       |                                 |                               |
|            |                      | GO:0005829,GO:001678 |                                       |                                 |                               |
| ug0279     | 871                  | GO:0005829,GO:001678 |                                       | intracellular,nucleus,cytosol   | hydrolase activity            |
|            |                      | GO:0005829,GO:001678 |                                       |                                 |                               |
|            |                      | GO:0005829,GO:001678 |                                       |                                 |                               |
|            |                      | GO:0005829,GO:001678 |                                       |                                 |                               |
| ug0280     | 585                  | GO:0005829,GO:001678 |                                       | intracellular,nucleus,cytosol   | hydrolase activity            |
|            |                      | GO:0005829,GO:001678 |                                       |                                 |                               |
|            |                      | GO:0005829,GO:001678 |                                       |                                 |                               |
|            |                      | GO:0005829,GO:001678 |                                       |                                 |                               |

| Unigene ID | sequence length (bp) | GO-ID                                                                                                                                                                | Biological process                                                                                                                                                                                                | Cellular component                     | Molecular function                              |
|------------|----------------------|----------------------------------------------------------------------------------------------------------------------------------------------------------------------|-------------------------------------------------------------------------------------------------------------------------------------------------------------------------------------------------------------------|----------------------------------------|-------------------------------------------------|
| ug0281     | 661                  |                                                                                                                                                                      |                                                                                                                                                                                                                   |                                        |                                                 |
| ug0282     | 791                  |                                                                                                                                                                      |                                                                                                                                                                                                                   |                                        |                                                 |
| ug0283_1   | 221                  |                                                                                                                                                                      |                                                                                                                                                                                                                   |                                        |                                                 |
| ug0283_2   | 706                  |                                                                                                                                                                      |                                                                                                                                                                                                                   |                                        |                                                 |
| ug0284_1   | 892                  |                                                                                                                                                                      |                                                                                                                                                                                                                   |                                        |                                                 |
| ug0284_2   | 550                  | GO:0005739                                                                                                                                                           |                                                                                                                                                                                                                   | mitochondrion                          |                                                 |
| ug0285     | 760                  |                                                                                                                                                                      |                                                                                                                                                                                                                   |                                        |                                                 |
| ug0286     | 587                  | GO:0005886                                                                                                                                                           |                                                                                                                                                                                                                   | plasma membrane                        |                                                 |
| ug0287     | 785                  | GO:0009058,GO:000987,GO:0006629,GO:0                                                                                                                                 | biosynthetic process,cellular process,lipid metabolic process                                                                                                                                                     |                                        | transferase activity                            |
| ug0288     | 717                  | GO:0009536                                                                                                                                                           |                                                                                                                                                                                                                   | plastid                                |                                                 |
| ug0289_1   | 566                  |                                                                                                                                                                      |                                                                                                                                                                                                                   |                                        |                                                 |
| ug0289_2   | 454                  | GO:0005576,GO:0016043,GO:0009987,GO:0                                                                                                                                | cellular component organization,cellular process                                                                                                                                                                  | extracellular region,membrane          |                                                 |
| ug0290_1   | 294                  |                                                                                                                                                                      |                                                                                                                                                                                                                   |                                        |                                                 |
| ug0290_2   | 503                  |                                                                                                                                                                      |                                                                                                                                                                                                                   |                                        |                                                 |
| ug0291     | 797                  | GO:0008152,GO:0019538,GO:0003824                                                                                                                                     | metabolic process,protein metabolic process                                                                                                                                                                       |                                        | catalytic activity                              |
| ug0292     | 232                  |                                                                                                                                                                      |                                                                                                                                                                                                                   |                                        |                                                 |
| ug0293     | 328                  | GO:0008152,GO:0003824,GO:0005739,GO:0                                                                                                                                | metabolic process                                                                                                                                                                                                 | mitochondrion                          | catalytic activity,binding                      |
| ug0294     | 311                  |                                                                                                                                                                      |                                                                                                                                                                                                                   |                                        |                                                 |
| ug0295     | 386                  |                                                                                                                                                                      |                                                                                                                                                                                                                   |                                        |                                                 |
| ug0296_1   | 452                  | GO:0019538,GO:000987,GO:0000166                                                                                                                                      | protein metabolic process,cellular process                                                                                                                                                                        |                                        | nucleotide binding                              |
| ug0296_2   | 511                  | GO:0016020,GO:0005777,GO:0016043,GO:0                                                                                                                                | cellular component organization,cellular process                                                                                                                                                                  | membrane,peroxisome                    |                                                 |
| ug0297     | 884                  | GO:0016301,GO:0005284                                                                                                                                                |                                                                                                                                                                                                                   |                                        | kinase activity,binding                         |
| ug0298     | 284                  |                                                                                                                                                                      |                                                                                                                                                                                                                   |                                        |                                                 |
| ug0299_1   | 785                  | GO:0005829,GO:0003824,GO:0005739,GO:0008152,GO:0009058,GO:0009987,GO:0009056,GO:0006519,GO:0006629,GO:0019748,GO:0005515,GO:0009536,GO:0019725,GO:0030234,GO:0008150 | metabolic process,biosynthetic process,cellular process,catabolic process,cellular amino acid and derivative metabolic process,lipid metabolic process,secondary metabolic process                                | cytosol,mitochondrion,plastid          | catalytic activity,protein binding,binding      |
| ug0299_2   | 913                  | GO:0006091,GO:0005975,GO:0009056,GO:0003824                                                                                                                          | homeostasis,biological_process generation of precursor metabolites and energy,carbohydrate metabolic process,catabolic process                                                                                    |                                        | enzyme regulator activity                       |
| ug0300     | 1308                 | GO:0005488,GO:0000166,GO:0005737,GO:0008152,GO:0009987,GO:0005730,GO:0005634,GO:0003723,GO:0006139,GO:0006950,GO:0009628,GO:000016                                   | metabolic process,cellular process                                                                                                                                                                                | cytoplasm                              | binding,nucleotide binding,transferase activity |
| ug0301_1   | 519                  | GO:0005198,GO:0005886,GO:0005783                                                                                                                                     | metabolic process,cellular process                                                                                                                                                                                | plasma membrane,endoplasmic reticulum  | structural molecule activity                    |
| ug0301_2   | 768                  | GO:0005886,GO:000987,GO:0005730,GO:0005634,GO:0003723,GO:0006139,GO:0006950,GO:0009628,GO:000016                                                                     | post-embryonic development,response to stress,response to biotic                                                                                                                                                  | plasma membrane                        | protein binding                                 |
| ug0302     | 735                  |                                                                                                                                                                      |                                                                                                                                                                                                                   |                                        |                                                 |
| ug0303     | 839                  |                                                                                                                                                                      |                                                                                                                                                                                                                   |                                        |                                                 |
| ug0304     | 188                  |                                                                                                                                                                      |                                                                                                                                                                                                                   |                                        |                                                 |
| ug0305     | 877                  | GO:0005488,GO:000987,GO:0000003,GO:000987,GO:0005515,GO:0                                                                                                            | reproduction,post-embryonic development,multicellular                                                                                                                                                             |                                        | binding,protein binding                         |
| ug0306     | 332                  |                                                                                                                                                                      |                                                                                                                                                                                                                   |                                        |                                                 |
| ug0307     | 807                  | GO:0005488,GO:0005739,GO:0005515,GO:0                                                                                                                                | organismal development,nucleobase, nucleoside, nucleotide and nucleic acid metabolic process,generation of precursor metabolites and energy,nucleobase, nucleoside, nucleotide and nucleic acid metabolic process | nucleoplasm                            | protein binding                                 |
| ug0308     | 1017                 | GO:0006139,GO:0009908,GO:0005215,GO:0016020,GO:0005739,GO:0                                                                                                          | development,nucleobase, nucleoside, nucleotide and nucleic acid metabolic process,generation of precursor metabolites and energy,nucleobase, nucleoside, nucleotide and nucleic acid metabolic process            | membrane,mitochondrion                 | transporter activity                            |
| ug0309     | 351                  | GO:0003677,GO:0005488,GO:0006259                                                                                                                                     | DNA metabolic process                                                                                                                                                                                             |                                        | DNA binding,binding                             |
| ug0310     | 866                  | GO:0005886,GO:0005783                                                                                                                                                |                                                                                                                                                                                                                   | plasma membrane,endoplasmic reticulum  |                                                 |
| ug0311     | 985                  |                                                                                                                                                                      |                                                                                                                                                                                                                   |                                        |                                                 |
| ug0312     | 503                  |                                                                                                                                                                      |                                                                                                                                                                                                                   |                                        |                                                 |
| ug0313     | 848                  |                                                                                                                                                                      |                                                                                                                                                                                                                   |                                        |                                                 |
| ug0314_1   | 829                  | GO:0009536                                                                                                                                                           |                                                                                                                                                                                                                   | plastid                                |                                                 |
| ug0314_2   | 682                  | GO:0006950,GO:000987,GO:0008152,GO:0009987,GO:0009536,GO:0005488,GO:0009579,GO:0005576,GO:000                                                                        | response to stress,response to biotic stimulus,metabolic process,cellular process                                                                                                                                 | plastid,thylakoid,extracellular region | binding,catalytic activity                      |



| Unigene ID | sequence length (bp) | GO-ID                                                                                                                                | Biological process                                                                                                          | Cellular component                                   | Molecular function                            |
|------------|----------------------|--------------------------------------------------------------------------------------------------------------------------------------|-----------------------------------------------------------------------------------------------------------------------------|------------------------------------------------------|-----------------------------------------------|
| ug0315     | 814                  | GO:0009719,GO:0007165,GO:0006950,GO:0                                                                                                | response to endogenous stimulus,signal                                                                                      |                                                      | transferase activity                          |
| ug0316     | 413                  |                                                                                                                                      |                                                                                                                             |                                                      |                                               |
| ug0317     | 673                  |                                                                                                                                      |                                                                                                                             |                                                      |                                               |
| ug0318     | 364                  |                                                                                                                                      |                                                                                                                             |                                                      |                                               |
| ug0319     | 764                  | GO:0016020,GO:0005783,GO:0005623,GO:0005488,GO:0006810,GO:0005975,GO:0009                                                            | transport,generation of precursor metabolites and energy                                                                    | membrane,endoplasmic reticulum,cell                  | binding                                       |
| ug0320_1   | 519                  | 987,GO:0016787,GO:0005576,GO:0005618,G                                                                                               | carbohydrate metabolic process,cellular process                                                                             | extracellular region,cell wall                       | hydrolase activity,transferase activity       |
| ug0320_2   | 912                  |                                                                                                                                      |                                                                                                                             |                                                      |                                               |
| ug0321     | 924                  | GO:0009719,GO:0007165,GO:0003824,GO:0                                                                                                | response to endogenous stimulus,signal transduction                                                                         |                                                      | catalytic activity,transferase activity       |
| ug0322     | 621                  | GO:0003677,GO:0006435                                                                                                                | transcription                                                                                                               |                                                      | DNA binding                                   |
| ug0323     | 435                  |                                                                                                                                      |                                                                                                                             |                                                      |                                               |
| ug0324_1   | 977                  | GO:0003824,GO:0009536,GO:0008150,GO:0005618,GO:0008152,GO:0005488,GO:0009058,GO:0006519,GO:000                                       | biological_process,metabolic process,biosynthetic process,cellular amino acid and derivative metabolic process              | plastid,cell wall,extracellular region,mitochondrion | catalytic activity,binding                    |
| ug0324_2   | 340                  | GO:0016043,GO:000987,GO:0005737,GO:0009653,GO:0016049,GO:0005576,GO:0016020,GO:0016787,GO:0006950,GO:0008219,GO:0005773,GO:0005975,G | cellular component organization,cellular process,anatomical structure morphogenesis,cell growth                             | cytoplasm,extracellular region,membrane              |                                               |
| ug0325_1   | 522                  | GO:0009056,GO:0009607,GO:0009987,GO:0005618,GO:0030246,GO:0008152,GO:000987,GO:0005488,GO:0                                          | response to stress,cell death,carbohydrate metabolic process,catabolic process,response to biotic stimulus,cellular process | vacuole,cell wall,extracellular region               | hydrolase activity,carbohydrate binding       |
| ug0325_2   | 833                  | GO:0008152,GO:000987,GO:0005488,GO:0                                                                                                 | metabolic process,cellular process                                                                                          |                                                      | binding,catalytic activity                    |
| ug0326     | 534                  | GO:0009536                                                                                                                           |                                                                                                                             | plastid                                              |                                               |
| ug0327     | 706                  |                                                                                                                                      |                                                                                                                             |                                                      |                                               |
| ug0328     | 850                  | GO:0006464,GO:0016301,GO:0000166                                                                                                     | protein modification process                                                                                                |                                                      | kinase activity,nucleotide binding            |
| ug0329_1   | 510                  | GO:0005975,GO:000987,GO:0016787,GO:0005576,GO:0005618,G                                                                              | carbohydrate metabolic process,cellular process                                                                             | extracellular region,cell wall                       | hydrolase activity,transferase activity       |
| ug0329_2   | 689                  | GO:0005737,GO:0008152,GO:0005975,GO:0009987,GO:0009056,GO:0003824,GO:0016020,GO:0005                                                 | metabolic process,carbohydrate metabolic process,cellular process,catabolic process                                         | cytoplasm                                            | binding,catalytic activity                    |
| ug0330     | 858                  | 737,GO:0005515,GO:0005215,GO:0006810,G                                                                                               | transport,cellular process                                                                                                  | membrane,cytoplasm                                   | protein binding,transporter activity          |
| ug0331     | 611                  |                                                                                                                                      |                                                                                                                             |                                                      |                                               |
| ug0332_1   | 505                  |                                                                                                                                      |                                                                                                                             |                                                      |                                               |
| ug0332_2   | 752                  | GO:0006950,GO:0009607,GO:0009536,GO:0016020,GO:0009579,G                                                                             | response to stress,response to biotic stimulus,transport                                                                    | plastid,membrane,thylakoid                           |                                               |
| ug0333     | 469                  |                                                                                                                                      |                                                                                                                             |                                                      |                                               |
| ug0334     | 673                  | GO:0005623,GO:0005413,GO:0005215,GO:0006                                                                                             | transport                                                                                                                   | cell,cytoplasm                                       | transporter activity                          |
| ug0335     | 413                  |                                                                                                                                      |                                                                                                                             |                                                      |                                               |
| ug0336     | 765                  |                                                                                                                                      |                                                                                                                             |                                                      |                                               |
| ug0337     | 1030                 |                                                                                                                                      |                                                                                                                             |                                                      |                                               |
| ug0338     | 539                  |                                                                                                                                      |                                                                                                                             |                                                      |                                               |
| ug0339     | 703                  | GO:0005515                                                                                                                           |                                                                                                                             |                                                      | protein binding                               |
| ug0340     | 841                  | GO:0005737                                                                                                                           |                                                                                                                             | cytoplasm                                            |                                               |
| ug0341     | 695                  | GO:0003824,GO:0016020,GO:0005622                                                                                                     |                                                                                                                             | membrane,intracellular                               | catalytic activity                            |
| ug0342     | 583                  |                                                                                                                                      |                                                                                                                             |                                                      |                                               |
| ug0343     | 134                  |                                                                                                                                      |                                                                                                                             |                                                      |                                               |
| ug0344     | 330                  | GO:0005739,GO:0009739,GO:0005623,GO:0005739,GO:0016020                                                                               |                                                                                                                             | mitochondrion,plastid                                |                                               |
| ug0345     | 793                  |                                                                                                                                      |                                                                                                                             | cell,mitochondrion,membrane                          |                                               |
| ug0346     | 834                  | GO:0005622                                                                                                                           |                                                                                                                             | intracellular                                        |                                               |
| ug0347     | 357                  |                                                                                                                                      |                                                                                                                             |                                                      |                                               |
| ug0348     | 545                  |                                                                                                                                      |                                                                                                                             |                                                      |                                               |
| ug0349     | 875                  | GO:0005737,GO:0009739,GO:0005488,GO:0008152,GO:0003824,GO:0                                                                          | metabolic process                                                                                                           | cytoplasm,plastid                                    | binding,catalytic activity,molecular_function |
| ug0350     | 665                  |                                                                                                                                      |                                                                                                                             |                                                      |                                               |
| ug0351     | 569                  |                                                                                                                                      |                                                                                                                             |                                                      |                                               |
| ug0352_1   | 178                  |                                                                                                                                      |                                                                                                                             |                                                      |                                               |
| ug0352_2   | 863                  |                                                                                                                                      |                                                                                                                             |                                                      |                                               |
| ug0353     | 716                  |                                                                                                                                      |                                                                                                                             |                                                      |                                               |
| ug0354     | 699                  |                                                                                                                                      |                                                                                                                             |                                                      |                                               |
| ug0355     | 919                  | GO:0016020                                                                                                                           |                                                                                                                             | membrane                                             |                                               |
| ug0356     | 522                  |                                                                                                                                      |                                                                                                                             |                                                      |                                               |

| Unigene ID | sequence length (bp) | GO-ID                                                                                                                                                                                                                                   | Biological process                                                                                                                                  | Cellular component                                | Molecular function                                                 |
|------------|----------------------|-----------------------------------------------------------------------------------------------------------------------------------------------------------------------------------------------------------------------------------------|-----------------------------------------------------------------------------------------------------------------------------------------------------|---------------------------------------------------|--------------------------------------------------------------------|
| ug0357     | 486                  | GO:0005773,GO:000515,GO:0005886                                                                                                                                                                                                         |                                                                                                                                                     | vacuole,plasma membrane                           | protein binding                                                    |
| ug0358_1   | 627                  |                                                                                                                                                                                                                                         |                                                                                                                                                     |                                                   |                                                                    |
| ug0358_2   | 422                  | GO:0005886                                                                                                                                                                                                                              |                                                                                                                                                     | plasma membrane                                   |                                                                    |
| ug0359_1   | 118                  |                                                                                                                                                                                                                                         |                                                                                                                                                     |                                                   |                                                                    |
| ug0359_2   | 773                  |                                                                                                                                                                                                                                         |                                                                                                                                                     |                                                   |                                                                    |
| ug0360     | 568                  |                                                                                                                                                                                                                                         |                                                                                                                                                     |                                                   |                                                                    |
| ug0361_1   | 474                  | GO:0004872,GO:0005488,GO:0005737,GO:0009987,GO:0016020,GO:0005783,GO:000681                                                                                                                                                             | cellular process,transport                                                                                                                          | cytoplasm,membrane,endoplasmic reticulum          | receptor activity,binding                                          |
| ug0361_2   | 242                  |                                                                                                                                                                                                                                         |                                                                                                                                                     |                                                   |                                                                    |
| ug0362     | 693                  | GO:0005730,GO:0003723,GO:0005515,GO:0003674,GO:0019725,GO:0005739,GO:0008152,GO:0000166,GO:0003824,GO:000573                                                                                                                            | nucleobase, nucleoside, nucleotide and nucleic acid metabolic process                                                                               | nucleolus                                         | RNA binding,protein binding                                        |
| ug0363     | 433                  | GO:0006139,GO:0005975,GO:0009056,GO:019748,GO:0003824,GO:0009536                                                                                                                                                                        | cellular homeostasis,metabolic process                                                                                                              | mitochondrion,cytoplasm                           | molecular_function,nucleotide binding,catalytic activity           |
| ug0364     | 822                  |                                                                                                                                                                                                                                         | nucleobase, nucleoside, nucleotide and nucleic acid metabolic process,carbohydrate metabolic process,catabolic process,secondary metabolic          | plastid                                           | catalytic activity                                                 |
| ug0365     | 453                  |                                                                                                                                                                                                                                         |                                                                                                                                                     |                                                   |                                                                    |
| ug0366     | 539                  | GO:0009579,GO:0016020,GO:0005515,GO:0009536,GO:0015979                                                                                                                                                                                  | photosynthesis                                                                                                                                      | thylakoid,membrane,plastid                        | protein binding                                                    |
| ug0367_1   | 645                  |                                                                                                                                                                                                                                         |                                                                                                                                                     |                                                   |                                                                    |
| ug0367_2   | 605                  | GO:0006464,GO:0006950,GO:0009628,GO:0005622,GO:0003723,GO:0005515,GO:0016301,GO:0000166,GO:000009719,GO:0008150,GO:0006350,GO:003700,GO:0005634,GO:0005488,GO:0006950,GO:0003824,GO:0008150,GO:0009719                                  | protein modification process,response to stress,response to abiotic stimulus,response to endogenous stimulus                                        | intracellular,nucleus                             | RNA binding,protein binding,kinase activity,nucleotide binding     |
| ug0368     | 871                  |                                                                                                                                                                                                                                         | response to endogenous stimulus,biological_process,transcription,response to stress,response to abiotic stimulus                                    | nucleus                                           | transcription factor activity,binding                              |
| ug0369_1   | 475                  | GO:0003824,GO:0008150,GO:0009719                                                                                                                                                                                                        | biological_process,response to endogenous stimulus                                                                                                  |                                                   | catalytic activity                                                 |
| ug0369_2   | 632                  | GO:0005488,GO:0008152,GO:0003824,GO:000536                                                                                                                                                                                              | metabolic process                                                                                                                                   |                                                   | binding,catalytic activity,molecular_function                      |
| ug0370     | 534                  |                                                                                                                                                                                                                                         |                                                                                                                                                     |                                                   |                                                                    |
| ug0371     | 980                  |                                                                                                                                                                                                                                         |                                                                                                                                                     |                                                   |                                                                    |
| ug0372     | 958                  | GO:0006810,GO:0009987,GO:0016020,GO:00019725,GO:0003674,GO:0005622,GO:0003677,GO:0016043,GO:0009987,GO:0005634,GO:0005215,GO:0006810,GO:0009058,GO:0006091,GO:0006139,GO:0009536,GO:0016787,GO:0005773,GO:0006810,GO:0000166,GO:0007165 | transport,cellular process                                                                                                                          | membrane,endosome                                 |                                                                    |
| ug0373     | 661                  |                                                                                                                                                                                                                                         | cellular homeostasis                                                                                                                                |                                                   | molecular_function,catalytic activity                              |
| ug0374     | 733                  |                                                                                                                                                                                                                                         | cellular component organization,cellular process                                                                                                    | intracellular,nucleus                             | DNA binding                                                        |
| ug0375_1   | 851                  |                                                                                                                                                                                                                                         | transport,biosynthetic process,generation of precursor metabolites and energy,nucleobase, nucleoside, nucleotide and nucleic acid metabolic process | plastid,vacuole,membrane,plasma membrane          | transporter activity,hydrolase activity                            |
| ug0375_2   | 975                  |                                                                                                                                                                                                                                         | transport,signal transduction                                                                                                                       |                                                   | nucleotide binding                                                 |
| ug0376     | 756                  |                                                                                                                                                                                                                                         |                                                                                                                                                     |                                                   |                                                                    |
| ug0377     | 780                  | GO:0006412,GO:0005622,GO:0006950,GO:0009607,GO:0005840,GO:0009536,GO:0005198,GO:0005515,GO:0016043,GO:0006810,GO:0009987,GO:0005794                                                                                                     | translation,response to stress,response to biotic stimulus                                                                                          | intracellular,ribosome,plastid,membrane,thylakoid | structural molecule activity,protein binding                       |
| ug0378     | 675                  |                                                                                                                                                                                                                                         | transport,cellular process                                                                                                                          | Golgi apparatus                                   |                                                                    |
| ug0379     | 894                  | GO:0005488,GO:0008152,GO:0003824,GO:000536                                                                                                                                                                                              | metabolic process                                                                                                                                   |                                                   | binding,catalytic activity,molecular_function                      |
| ug0380     | 196                  |                                                                                                                                                                                                                                         |                                                                                                                                                     |                                                   |                                                                    |
| ug0381     | 722                  | GO:0006950,GO:0009607,GO:0005622,GO:0003677,GO:0016043,GO:0009987,GO:0005515,GO:0009908,GO:0000030234,GO:0003677,GO:0006259,GO:0009058,GO:0005622,GO:0009987,GO:0005575,GO:0000166,GO:0016043,GO:0005198,GO:0016787,GO:000585           | response to stress,response to biotic stimulus,cellular component organization,cellular process,flower development                                  | intracellular,nucleus                             | DNA binding,protein binding                                        |
| ug0382     | 822                  |                                                                                                                                                                                                                                         | DNA metabolic process,biosynthetic process                                                                                                          | intracellular,nucleus                             | enzyme regulator activity,DNA binding                              |
| ug0383     | 894                  |                                                                                                                                                                                                                                         | cellular process,cellular component organization                                                                                                    | cellular_component,cytoskeleton                   | nucleotide binding,structural molecule activity,hydrolase activity |

| Unigene ID | sequence length (bp) | GO-ID                                                                                                                               | Biological process                                                                                                             | Cellular component                                 | Molecular function                                        |
|------------|----------------------|-------------------------------------------------------------------------------------------------------------------------------------|--------------------------------------------------------------------------------------------------------------------------------|----------------------------------------------------|-----------------------------------------------------------|
| ug0384     | 689                  |                                                                                                                                     |                                                                                                                                |                                                    |                                                           |
| ug0385     | 201                  |                                                                                                                                     |                                                                                                                                |                                                    |                                                           |
| ug0386     | 571                  | GO:0006810,GO:0016020,GO:0005215                                                                                                    | transport                                                                                                                      | membrane                                           | transporter activity                                      |
| ug0387     | 913                  | GO:0008152,GO:0005488,GO:0030528,GO:0000000                                                                                         | metabolic process                                                                                                              |                                                    | binding,transcription regulator activity,catalytic        |
| ug0388     | 451                  |                                                                                                                                     |                                                                                                                                |                                                    |                                                           |
| ug0389     | 925                  | GO:0009536,GO:0005215,GO:0000003,GO:0009791,GO:0009790,GO:0016020,GO:0006810                                                        | reproduction,post-embryonic development,embryonic development,transport                                                        | plastid,membrane                                   | transporter activity                                      |
| ug0390     | 749                  |                                                                                                                                     |                                                                                                                                |                                                    |                                                           |
| ug0391     | 1023                 | GO:0006950                                                                                                                          | response to stress                                                                                                             |                                                    |                                                           |
| ug0392     | 804                  |                                                                                                                                     |                                                                                                                                |                                                    |                                                           |
| ug0393     | 438                  | GO:0005198,GO:0003723,GO:0005840,GO:0005783                                                                                         | translation                                                                                                                    | ribosome                                           | structural molecule activity,RNA binding                  |
| ug0394     | 744                  |                                                                                                                                     |                                                                                                                                |                                                    |                                                           |
| ug0395     | 625                  | GO:0005783                                                                                                                          |                                                                                                                                | endoplasmic reticulum                              |                                                           |
| ug0396     | 877                  |                                                                                                                                     |                                                                                                                                |                                                    |                                                           |
| ug0397     | 645                  | GO:0005739                                                                                                                          |                                                                                                                                | mitochondrion                                      |                                                           |
| ug0398     | 457                  | GO:0016740                                                                                                                          |                                                                                                                                |                                                    | transferase activity                                      |
| ug0399     | 187                  |                                                                                                                                     |                                                                                                                                |                                                    |                                                           |
| ug0400     | 415                  | GO:0005198,GO:0005840,GO:0009536,GO:0006412,GO:0003723,GO:0005739,GO:0006091,GO:0015979,GO:0003674,GO:0005488,GO:0006810            | translation                                                                                                                    | ribosome,plastid,mitochondrion                     | structural molecule activity,RNA binding                  |
| ug0401     | 374                  |                                                                                                                                     |                                                                                                                                |                                                    |                                                           |
| ug0402     | 901                  | GO:0000166,GO:0006091,GO:0016020,GO:0009579,GO:0006091,GO:0015979,GO:0003674,GO:0005488,GO:0006810                                  | response to stress<br>generation of precursor metabolites and energy,photosynthesis,transport                                  | membrane,thylakoid,plastid                         | nucleotide binding<br>molecular_function,binding          |
| ug0403     | 458                  |                                                                                                                                     |                                                                                                                                |                                                    |                                                           |
| ug0404     | 449                  |                                                                                                                                     |                                                                                                                                |                                                    |                                                           |
| ug0405     | 557                  |                                                                                                                                     |                                                                                                                                |                                                    |                                                           |
| ug0406     | 524                  |                                                                                                                                     |                                                                                                                                |                                                    |                                                           |
| ug0407     | 610                  | GO:0003677,GO:000515,GO:0003700,GO:0005634,GO:0006350,GO:0005198,GO:0005840,GO:0006412                                              | transcription                                                                                                                  | nucleus                                            | DNA binding,protein binding,transcription factor activity |
| ug0408_1   | 518                  | GO:0005198,GO:0005840,GO:0006412                                                                                                    | translation                                                                                                                    | ribosome                                           | structural molecule activity                              |
| ug0408_2   | 303                  |                                                                                                                                     |                                                                                                                                |                                                    |                                                           |
| ug0409_1   | 906                  |                                                                                                                                     |                                                                                                                                |                                                    |                                                           |
| ug0409_2   | 371                  | GO:0005623                                                                                                                          |                                                                                                                                | cell                                               |                                                           |
| ug0410     | 1137                 | GO:0016020,GO:0005794,GO:0005515,GO:0006810,GO:0009987,GO:0005198,GO:0005739,GO:0016787,GO:0009536,GO:0000166,GO:0005488,GO:0006810 | transport,cellular process                                                                                                     | membrane,Golgi apparatus,cytoplasm,plasma membrane | protein binding,structural molecule activity              |
| ug0411     | 872                  | GO:0016787,GO:0009536,GO:0000166,GO:0005488,GO:0006810                                                                              | signal transduction                                                                                                            | plastid                                            | hydrolase activity,nucleotide binding                     |
| ug0412     | 126                  |                                                                                                                                     |                                                                                                                                |                                                    |                                                           |
| ug0413     | 653                  |                                                                                                                                     |                                                                                                                                |                                                    |                                                           |
| ug0414     | 831                  | GO:0003824,GO:0008152,GO:0000166                                                                                                    | metabolic process                                                                                                              |                                                    | catalytic activity,nucleotide binding                     |
| ug0415     | 1047                 |                                                                                                                                     |                                                                                                                                |                                                    |                                                           |
| ug0416     | 716                  |                                                                                                                                     |                                                                                                                                |                                                    |                                                           |
| ug0417     | 718                  | GO:0005488,GO:0006091,GO:0003674,GO:0005739,GO:0006810                                                                              | generation of precursor metabolites and energy,transport                                                                       | mitochondrion                                      | binding,molecular_function                                |
| ug0418     | 660                  | GO:0030234                                                                                                                          |                                                                                                                                |                                                    | enzyme regulator activity                                 |
| ug0419_1   | 892                  |                                                                                                                                     |                                                                                                                                |                                                    |                                                           |
| ug0419_2   | 858                  |                                                                                                                                     |                                                                                                                                |                                                    |                                                           |
| ug0420     | 1056                 | GO:0005768,GO:0000166,GO:0006810,GO:0009987,GO:0016020,GO:0005515,GO:000716                                                         | transport,cellular process,signal transduction                                                                                 | endosome,membrane                                  | nucleotide binding,protein binding,hydrolase activity     |
| ug0421     | 452                  |                                                                                                                                     |                                                                                                                                |                                                    |                                                           |
| ug0422     | 359                  |                                                                                                                                     |                                                                                                                                |                                                    |                                                           |
| ug0423     | 492                  |                                                                                                                                     |                                                                                                                                |                                                    |                                                           |
| ug0424     | 588                  | GO:0005840,GO:0005198,GO:0006412,GO:0005773,GO:0005634,GO:0005886,GO:0005739,GO:0006412,GO:0006519,GO:0003824,GO:0000166            | translation                                                                                                                    | ribosome,mitochondrion                             | structural molecule activity                              |
| ug0425     | 853                  |                                                                                                                                     |                                                                                                                                | vacuole,nucleus,plasma membrane                    | nucleotide binding                                        |
| ug0426     | 901                  |                                                                                                                                     |                                                                                                                                |                                                    |                                                           |
| ug0427     | 196                  |                                                                                                                                     |                                                                                                                                |                                                    |                                                           |
| ug0428     | 880                  | GO:0005737,GO:0006139,GO:0006412,GO:0006519,GO:0003824,GO:0000166                                                                   | nucleobase, nucleoside, nucleotide and nucleic acid metabolic process,translation,cellular amino acid and derivative metabolic | cytoplasm                                          | catalytic activity,nucleotide binding                     |
| ug0429     | 731                  | GO:0005623                                                                                                                          |                                                                                                                                | cell                                               |                                                           |

| Unigene ID | sequence length (bp) | GO-ID                                                                                                                                       | Biological process                                                                                            | Cellular component                                            | Molecular function                           |
|------------|----------------------|---------------------------------------------------------------------------------------------------------------------------------------------|---------------------------------------------------------------------------------------------------------------|---------------------------------------------------------------|----------------------------------------------|
| ug0430_1   | 744                  | GO:0016020,GO:0009579,GO:0009536,GO:0005794,GO:0005886                                                                                      |                                                                                                               | membrane,thylakoid,plastid,Golgi apparatus,plasma membrane    |                                              |
| ug0430_2   | 1094                 | GO:0003824                                                                                                                                  |                                                                                                               |                                                               | catalytic activity                           |
| ug0431     | 1039                 | GO:0019538,GO:0009056,GO:0016787                                                                                                            | protein metabolic process,catabolic process                                                                   |                                                               | hydrolase activity                           |
| ug0432     | 667                  |                                                                                                                                             |                                                                                                               |                                                               |                                              |
| ug0433     | 495                  |                                                                                                                                             |                                                                                                               |                                                               |                                              |
| ug0434     | 837                  | GO:0005840,GO:0005198,GO:0006412                                                                                                            | translation                                                                                                   | ribosome                                                      | structural molecule activity                 |
| ug0435     | 717                  | GO:0005739                                                                                                                                  |                                                                                                               | mitochondrion                                                 |                                              |
| ug0436     | 909                  | GO:0005840,GO:0005198,GO:0006412                                                                                                            | translation                                                                                                   | ribosome                                                      | structural molecule activity                 |
| ug0437     | 695                  |                                                                                                                                             |                                                                                                               |                                                               |                                              |
| ug0438     | 742                  | GO:0006950,GO:0009056,GO:0009987,GO:0005777,GO:0005488,GO:0008152,GO:0003824                                                                | response to stress,catabolic process,cellular process,metabolic process                                       | peroxisome                                                    | binding,catalytic activity                   |
| ug0439     | 778                  | GO:0016020,GO:0016713                                                                                                                       |                                                                                                               | membrane                                                      | hydrolase activity                           |
| ug0440     | 713                  |                                                                                                                                             |                                                                                                               |                                                               |                                              |
| ug0441     | 235                  |                                                                                                                                             |                                                                                                               |                                                               |                                              |
| ug0442     | 537                  |                                                                                                                                             |                                                                                                               |                                                               |                                              |
| ug0443     | 115                  |                                                                                                                                             |                                                                                                               |                                                               |                                              |
| ug0444     | 692                  |                                                                                                                                             |                                                                                                               |                                                               |                                              |
| ug0445_1   | 988                  | GO:0006139,GO:0005737,GO:0016787                                                                                                            | nucleobase, nucleoside, nucleotide and nucleic acid metabolic process                                         | cytoplasm                                                     | hydrolase activity                           |
| ug0445_2   | 732                  | GO:0007165,GO:0003700,GO:0005634,GO:0009791,GO:0006350                                                                                      | signal transduction,post-embryonic development,transcription                                                  | nucleus                                                       | transcription factor activity                |
| ug0446     | 250                  |                                                                                                                                             |                                                                                                               |                                                               |                                              |
| ug0447_1   | 519                  | GO:0005886                                                                                                                                  |                                                                                                               | plasma membrane                                               |                                              |
| ug0447_2   | 943                  |                                                                                                                                             |                                                                                                               |                                                               |                                              |
| ug0448     | 1124                 | GO:0016787,GO:0009536,GO:0009056,GO:0005515,GO:0005739,GO:0019538,GO:0009056                                                                | protein metabolic process,catabolic process                                                                   | plastid,thylakoid                                             | hydrolase activity                           |
| ug0449     | 522                  | GO:0019538,GO:0009987,GO:0006950,GO:0009628,GO:0009536,GO:0000166,GO:0016020,GO:0009579,GO:0006950,GO:0019725,GO:0005739,GO:0005515,GO:0005 | protein metabolic process,cellular process,response to stress,response to abiotic stimulus,biological_process | mitochondrion,plastid,membrane,thylakoid,extracellular region | protein binding,nucleotide binding           |
| ug0450_1   | 834                  | GO:0006950,GO:0019725,GO:0005739,GO:0005515,GO:0005                                                                                         | response to stress,cellular homeostasis                                                                       | mitochondrion                                                 | catalytic activity                           |
| ug0450_2   | 738                  |                                                                                                                                             |                                                                                                               |                                                               |                                              |
| ug0451     | 483                  | GO:0005515,GO:0005215,GO:0006810,GO:0009987,GO:0016020,GO:0005737,GO:0016                                                                   | transport,cellular process                                                                                    | membrane,cytoplasm                                            | protein binding,transporter activity         |
| ug0452     | 1003                 | GO:0005737,GO:0016020,GO:0009058,GO:0006519,GO:0003824,GO:000                                                                               | biosynthetic process,cellular amino acid and derivative metabolic                                             | cytoplasm                                                     | hydrolase activity                           |
| ug0453     | 1145                 |                                                                                                                                             |                                                                                                               | plastid                                                       | catalytic activity                           |
| ug0454     | 249                  |                                                                                                                                             |                                                                                                               |                                                               |                                              |
| ug0455     | 222                  |                                                                                                                                             |                                                                                                               |                                                               |                                              |
| ug0456     | 899                  | GO:0016020                                                                                                                                  |                                                                                                               | membrane                                                      |                                              |
| ug0457_1   | 876                  | GO:0003824,GO:0005000,GO:0003824,GO:0008                                                                                                    | metabolic process,cellular                                                                                    |                                                               | catalytic activity,binding                   |
| ug0457_2   | 820                  | GO:0009987,GO:0005975                                                                                                                       | process,carbohydrate metabolic process                                                                        |                                                               | catalytic activity                           |
| ug0458_1   | 1208                 | GO:0003723                                                                                                                                  |                                                                                                               |                                                               | RNA binding                                  |
| ug0458_2   | 678                  | GO:0016020,GO:0006810,GO:0009987                                                                                                            | transport,cellular process                                                                                    | membrane                                                      |                                              |
| ug0459     | 312                  | GO:0016020,GO:0009536,GO:0016043,GO:000                                                                                                     | cellular component organization,cellular process                                                              | membrane,plastid                                              |                                              |
| ug0460     | 862                  | GO:0006464                                                                                                                                  | protein modification process                                                                                  |                                                               |                                              |
| ug0461     | 911                  | GO:0019725,GO:0003674,GO:0003824                                                                                                            | cellular homeostasis                                                                                          |                                                               | molecular_function,catalytic activity        |
| ug0462     | 1222                 |                                                                                                                                             |                                                                                                               |                                                               |                                              |
| ug0463     | 391                  |                                                                                                                                             |                                                                                                               |                                                               |                                              |
| ug0464     | 703                  |                                                                                                                                             |                                                                                                               |                                                               |                                              |
| ug0465     | 497                  |                                                                                                                                             |                                                                                                               |                                                               |                                              |
| ug0466     | 715                  | GO:0016740,GO:000515,GO:0009058,GO:0005975,GO:0009987,GO:0016020,GO:000548                                                                  | biosynthetic process,carbohydrate metabolic process,cellular process                                          | membrane                                                      | transferase activity,protein binding,binding |
| ug0467     | 957                  | GO:0016787,GO:0019538,GO:0009987,GO:0016020,GO:0005783                                                                                      | protein metabolic process,cellular process                                                                    | membrane,endoplasmic reticulum                                | hydrolase activity                           |
| ug0468     | 298                  |                                                                                                                                             |                                                                                                               |                                                               |                                              |
| ug0469     | 850                  | GO:0016043,GO:0009987,GO:0005737,GO:0005515,GO:0005856                                                                                      | cellular component organization,cellular process                                                              | cytoplasm,cytoskeleton                                        | protein binding                              |

| Unigene ID | sequence length (bp) | GO-ID                                                                                                          | Biological process                                                                                               | Cellular component                           | Molecular function                                              |
|------------|----------------------|----------------------------------------------------------------------------------------------------------------|------------------------------------------------------------------------------------------------------------------|----------------------------------------------|-----------------------------------------------------------------|
| ug0470     | 213                  |                                                                                                                |                                                                                                                  |                                              |                                                                 |
| ug0471     | 192                  | GO:0019538,GO:0009                                                                                             | protein metabolic process,cellular process                                                                       | endoplasmic reticulum                        | protein binding,binding                                         |
| ug0472_1   | 191                  |                                                                                                                |                                                                                                                  |                                              |                                                                 |
| ug0472_2   | 1013                 |                                                                                                                |                                                                                                                  |                                              |                                                                 |
| ug0473     | 490                  | GO:0005975,GO:0009<br>987,GO:0005739,GO:0<br>016740,GO:0006091,G<br>O:0009056,GO:000382                        | carbohydrate metabolic process,cellular process,generation of precursor metabolites and energy,catabolic process | mitochondrion                                | transferase activity,catalytic activity                         |
| ug0474     | 264                  |                                                                                                                |                                                                                                                  |                                              |                                                                 |
| ug0475     | 837                  |                                                                                                                |                                                                                                                  |                                              |                                                                 |
| ug0476     | 449                  |                                                                                                                |                                                                                                                  |                                              |                                                                 |
| ug0477_1   | 748                  | GO:0009058,GO:0009<br>987,GO:0006629,GO:0<br>005215,GO:0005488,G<br>GO:0005488,GO:0005                         | biosynthetic process,cellular process,lipid metabolic process                                                    | plastid                                      | transporter activity,binding                                    |
| ug0477_2   | 469                  | 515,GO:0005215,GO:0<br>016020,GO:0005739,G<br>O:0006810,GO:001604                                              | transport,cellular component organization,cellular process                                                       | membrane,mitochondrion                       | binding,protein binding,transporter activity                    |
| ug0478     | 820                  | GO:0005739                                                                                                     |                                                                                                                  | mitochondrion                                |                                                                 |
| ug0479     | 615                  | GO:0005840,GO:0005<br>198,GO:0006412                                                                           | translation                                                                                                      | ribosome                                     | structural molecule activity                                    |
| ug0480     | 290                  |                                                                                                                |                                                                                                                  |                                              |                                                                 |
| ug0481     | 329                  |                                                                                                                |                                                                                                                  |                                              |                                                                 |
| ug0482     | 702                  | GO:0005576                                                                                                     |                                                                                                                  | extracellular region                         |                                                                 |
| ug0483     | 497                  | GO:0006412,GO:0008<br>135                                                                                      | translation                                                                                                      |                                              | translation factor activity, nucleic acid binding               |
| ug0484     | 258                  |                                                                                                                |                                                                                                                  |                                              |                                                                 |
| ug0485     | 138                  |                                                                                                                |                                                                                                                  |                                              |                                                                 |
| ug0486     | 470                  |                                                                                                                |                                                                                                                  |                                              |                                                                 |
| ug0487     | 874                  |                                                                                                                |                                                                                                                  |                                              |                                                                 |
| ug0488     | 549                  | GO:0003677,GO:0003<br>700,GO:0005634,GO:0                                                                      | transcription                                                                                                    | nucleus                                      | DNA binding,transcription factor activity                       |
| ug0489     | 767                  | GO:0005623,GO:0005<br>737,GO:0005739                                                                           |                                                                                                                  | cell,cytoplasm,mitochondrion                 |                                                                 |
| ug0490     | 706                  | GO:0006091,GO:0016<br>020,GO:0005622,GO:0<br>003824,GO:0009058,G<br>O:0009987,GO:000953                        | generation of precursor metabolites and energy,biosynthetic process,cellular process                             | membrane,intracellular,plastid,mitochondrion | catalytic activity                                              |
| ug0491     | 692                  | GO:0008152,GO:0016                                                                                             | metabolic process                                                                                                |                                              | hydrolase activity                                              |
| ug0492     | 1009                 | GO:0006464,GO:0005<br>623,GO:0016301,GO:0                                                                      | protein modification process                                                                                     | cell                                         | kinase activity,nucleotide binding                              |
| ug0493_1   | 556                  |                                                                                                                |                                                                                                                  |                                              |                                                                 |
| ug0493_2   | 444                  |                                                                                                                |                                                                                                                  |                                              |                                                                 |
| ug0494     | 530                  | GO:0005488,GO:0008<br>152,GO:0003824,GO:0                                                                      | metabolic process                                                                                                |                                              | binding,catalytic activity,molecular_function                   |
| ug0495     | 553                  | GO:0016787,GO:0006<br>519                                                                                      | cellular amino acid and derivative metabolic process                                                             |                                              | hydrolase activity                                              |
| ug0496     | 873                  |                                                                                                                |                                                                                                                  |                                              |                                                                 |
| ug0497     | 866                  | GO:0005622,GO:0016<br>787,GO:0019538,GO:0<br>009056,GO:0009987,G<br>O:0000166,GO:000563<br>4,GO:0005829,GO:000 | protein metabolic process,catabolic process,cellular process                                                     | intracellular,nucleus,cytosol                | hydrolase activity,nucleotide binding,protein binding           |
| ug0498_1   | 1080                 | GO:0009058,GO:0006<br>519,GO:0009536,GO:0                                                                      | biosynthetic process,cellular amino acid and derivative metabolic process                                        | plastid                                      | catalytic activity                                              |
| ug0498_2   | 469                  | GO:0005975,GO:0016                                                                                             | carbohydrate metabolic process                                                                                   |                                              | hydrolase activity                                              |
| ug0499     | 430                  |                                                                                                                |                                                                                                                  |                                              |                                                                 |
| ug0500_1   | 701                  |                                                                                                                |                                                                                                                  |                                              |                                                                 |
| ug0500_2   | 796                  | GO:0016740,GO:0006<br>350,GO:0003677,GO:0                                                                      | transcription                                                                                                    | plastid                                      | transferase activity,DNA binding                                |
| ug0501     | 440                  |                                                                                                                |                                                                                                                  |                                              |                                                                 |
| ug0502_1   | 996                  |                                                                                                                |                                                                                                                  |                                              |                                                                 |
| ug0502_2   | 245                  |                                                                                                                |                                                                                                                  |                                              |                                                                 |
| ug0503     | 434                  | GO:0016020,GO:0005<br>739,GO:0006091,GO:0                                                                      | generation of precursor metabolites and energy,transport                                                         | membrane,mitochondrion                       |                                                                 |
| ug0504     | 733                  | GO:0005488,GO:0009<br>GO:0006091,GO:0015                                                                       | cellular process                                                                                                 |                                              | binding                                                         |
| ug0505     | 913                  | 979,GO:0016020,GO:0<br>009579,GO:0009536<br>GO:0009536,GO:0030<br>234,GO:0006950,GO:0                          | generation of precursor metabolites and energy,photosynthesis                                                    | membrane,thylakoid,plastid                   |                                                                 |
| ug0506     | 684                  | 003674,GO:0019725,G<br>O:0008152,GO:000561<br>8,GO:0008150,GO:000<br>3824,GO:0016020,GO:                       | response to stress,cellular homeostasis,metabolic process,biological_process                                     | plastid,cell wall,membrane,thylakoid         | enzyme regulator activity,molecular_function,catalytic activity |
| ug0507     | 698                  |                                                                                                                |                                                                                                                  |                                              |                                                                 |
| ug0508     | 431                  |                                                                                                                |                                                                                                                  |                                              |                                                                 |
| ug0509     | 453                  |                                                                                                                |                                                                                                                  |                                              |                                                                 |

| Unigene ID | sequence length (bp) | GO-ID                                                                                   | Biological process                                                                                                      | Cellular component                   | Molecular function                                           |
|------------|----------------------|-----------------------------------------------------------------------------------------|-------------------------------------------------------------------------------------------------------------------------|--------------------------------------|--------------------------------------------------------------|
| ug0510     | 413                  |                                                                                         |                                                                                                                         |                                      |                                                              |
| ug0511     | 1121                 |                                                                                         |                                                                                                                         |                                      |                                                              |
| ug0512     | 1238                 |                                                                                         |                                                                                                                         |                                      |                                                              |
| ug0513     | 745                  |                                                                                         |                                                                                                                         |                                      |                                                              |
| ug0514     | 343                  |                                                                                         |                                                                                                                         |                                      |                                                              |
| ug0515     | 1016                 | GO:0008152,GO:0003824,GO:0009536                                                        | metabolic process                                                                                                       | plastid                              | catalytic activity                                           |
| ug0516     | 622                  | GO:0009058,GO:0006519,GO:0019748,GO:0008152,GO:0003824,GO:0005488                       | biosynthetic process,cellular amino acid and derivative metabolic process,secondary metabolic process,metabolic process |                                      | catalytic activity,binding                                   |
| ug0517     | 431                  |                                                                                         |                                                                                                                         |                                      |                                                              |
| ug0518     | 768                  | GO:0005623                                                                              |                                                                                                                         | cell                                 |                                                              |
| ug0519     | 817                  |                                                                                         |                                                                                                                         |                                      |                                                              |
| ug0520     | 673                  | GO:0009628,GO:0006950                                                                   | response to abiotic stimulus,response to stress                                                                         |                                      |                                                              |
| ug0521     | 861                  | GO:0009536                                                                              |                                                                                                                         | plastid                              |                                                              |
| ug0522     | 705                  |                                                                                         |                                                                                                                         |                                      |                                                              |
| ug0523     | 263                  |                                                                                         |                                                                                                                         |                                      |                                                              |
| ug0524_1   | 893                  | GO:0006350,GO:0003700,GO:0005634,GO:0009719,GO:0007165                                  | transcription,response to endogenous stimulus,signal transduction                                                       | nucleus                              | transcription factor activity                                |
| ug0524_2   | 566                  | GO:0016787,GO:0008GO:0005737,GO:0008                                                    | metabolic process                                                                                                       |                                      | hydrolase activity                                           |
| ug0525     | 758                  | 135,GO:0000166,GO:0006412,GO:0016787                                                    | translation                                                                                                             | cytoplasm                            | translation factor activity, nucleic acid binding,nucleotide |
| ug0526     | 782                  | GO:0016043,GO:0009987,GO:0005737,GO:0005515,GO:0005856                                  | cellular component organization,cellular process                                                                        | cytoplasm,cytoskeleton               | protein binding                                              |
| ug0527     | 918                  |                                                                                         |                                                                                                                         |                                      |                                                              |
| ug0528_1   | 468                  | GO:0016787                                                                              |                                                                                                                         |                                      | hydrolase activity                                           |
| ug0528_2   | 779                  |                                                                                         |                                                                                                                         |                                      |                                                              |
| ug0529     | 805                  |                                                                                         |                                                                                                                         |                                      |                                                              |
| ug0530     | 874                  |                                                                                         |                                                                                                                         |                                      |                                                              |
| ug0531     | 415                  |                                                                                         |                                                                                                                         |                                      |                                                              |
| ug0532     | 633                  |                                                                                         |                                                                                                                         |                                      |                                                              |
| ug0533_1   | 833                  | GO:0005840,GO:0005198,GO:0009536,GO:0016020,GO:0006412,G                                | translation                                                                                                             | ribosome,plastid,membrane            | structural molecule activity,RNA binding                     |
| ug0533_2   | 806                  |                                                                                         |                                                                                                                         |                                      |                                                              |
| ug0534     | 437                  |                                                                                         |                                                                                                                         |                                      |                                                              |
| ug0535     | 925                  | GO:0005488                                                                              |                                                                                                                         |                                      | binding                                                      |
| ug0536     | 857                  |                                                                                         |                                                                                                                         |                                      |                                                              |
| ug0537     | 601                  |                                                                                         |                                                                                                                         |                                      |                                                              |
| ug0538     | 1157                 | GO:0006091,GO:0000166,GO:0006950,GO:0003824,GO:0016020,GO:0005622,GO:000367             | generation of precursor metabolites and energy,response to stress                                                       | membrane,intracellular,mitochondrion | nucleotide binding,catalytic activity,molecular_function     |
| ug0539     | 462                  | GO:0005515                                                                              |                                                                                                                         |                                      | protein binding                                              |
| ug0540     | 747                  | GO:0016740                                                                              |                                                                                                                         |                                      | transferase activity                                         |
| ug0541     | 277                  |                                                                                         |                                                                                                                         |                                      |                                                              |
| ug0542_1   | 754                  |                                                                                         |                                                                                                                         |                                      |                                                              |
| ug0542_2   | 577                  |                                                                                         |                                                                                                                         |                                      |                                                              |
| ug0543     | 734                  |                                                                                         |                                                                                                                         |                                      |                                                              |
| ug0544_1   | 856                  | GO:0016020                                                                              |                                                                                                                         | membrane                             |                                                              |
| ug0544_2   | 447                  | GO:0005623                                                                              |                                                                                                                         | cell                                 |                                                              |
| ug0545     | 736                  |                                                                                         |                                                                                                                         |                                      |                                                              |
| ug0546     | 491                  | GO:0005488,GO:0003824,GO:0008152,GO:0005623,GO:0009719,GO:0016020,GO:0006950,GO:0009628 | metabolic process response to endogenous stimulus,response to stress,response to abiotic stimulus                       | cell,membrane                        | binding,catalytic activity,molecular_function                |
| ug0547     | 627                  | GO:0006810,GO:0000166,GO:0007165,GO:0003677,GO:0003                                     | transport,signal transduction                                                                                           |                                      | nucleotide binding                                           |
| ug0548     | 798                  |                                                                                         |                                                                                                                         |                                      |                                                              |
| ug0549     | 676                  | 824,GO:0000166,GO:0005622,GO:0006259                                                    | DNA metabolic process                                                                                                   | intracellular                        | DNA binding,catalytic activity,nucleotide binding            |
| ug0550     | 368                  |                                                                                         |                                                                                                                         |                                      |                                                              |
| ug0551     | 694                  | GO:0016740,GO:0008                                                                      | metabolic process                                                                                                       |                                      | transferase activity                                         |
| ug0552     | 362                  |                                                                                         |                                                                                                                         |                                      |                                                              |
| ug0553     | 515                  |                                                                                         |                                                                                                                         |                                      |                                                              |
| ug0554     | 981                  | GO:0005739,GO:0016                                                                      |                                                                                                                         | mitochondrion,membrane               |                                                              |
| ug0555     | 600                  |                                                                                         |                                                                                                                         |                                      |                                                              |
| ug0556_1   | 773                  |                                                                                         |                                                                                                                         |                                      |                                                              |
| ug0556_2   | 1129                 | GO:0016787,GO:0005622,GO:0019538,GO:0009056,GO:0009987                                  | protein metabolic process,catabolic process,cellular process                                                            | intracellular                        | hydrolase activity                                           |
| ug0557_1   | 793                  | GO:0005840,GO:0005198,GO:0009987,GO:0                                                   | cellular process,translation                                                                                            | ribosome                             | structural molecule activity                                 |
| ug0557_2   | 1216                 |                                                                                         |                                                                                                                         |                                      |                                                              |

| Unigene ID | sequence length (bp) | GO-ID                                                                                                                                                               | Biological process                                                                                                                     | Cellular component                             | Molecular function                                |
|------------|----------------------|---------------------------------------------------------------------------------------------------------------------------------------------------------------------|----------------------------------------------------------------------------------------------------------------------------------------|------------------------------------------------|---------------------------------------------------|
| ug0558     | 622                  | GO:0009536                                                                                                                                                          |                                                                                                                                        | plastid                                        |                                                   |
| ug0559     | 289                  |                                                                                                                                                                     |                                                                                                                                        |                                                |                                                   |
|            |                      | GO:0005623,GO:0016                                                                                                                                                  |                                                                                                                                        |                                                |                                                   |
| ug0560     | 760                  | 020,GO:0005215,GO:0006810,GO:0009987                                                                                                                                | transport,cellular process                                                                                                             | cell,membrane                                  | transporter activity                              |
| ug0561_1   | 275                  |                                                                                                                                                                     |                                                                                                                                        |                                                |                                                   |
| ug0561_2   | 871                  | GO:0000166,GO:0003677,GO:0006950,GO:0006810,GO:0016020,GO:0005215                                                                                                   | response to stress,DNA metabolic process                                                                                               |                                                | nucleotide binding,DNA binding                    |
| ug0562     | 1161                 | GO:0006810,GO:0016020,GO:0005215                                                                                                                                    | transport                                                                                                                              | membrane                                       | transporter activity                              |
|            |                      | GO:0030234,GO:0008150,GO:0005737,GO:0005886,GO:0005576,GO:0008152,GO:000998                                                                                         | biological_process,metabolic process,cellular process                                                                                  | cytoplasm,plasma membrane,extracellular region | enzyme regulator activity                         |
| ug0563     | 1281                 |                                                                                                                                                                     |                                                                                                                                        |                                                |                                                   |
| ug0564     | 649                  | GO:0005615                                                                                                                                                          |                                                                                                                                        | extracellular space                            |                                                   |
| ug0565     | 631                  | GO:0006950                                                                                                                                                          | response to stress                                                                                                                     |                                                |                                                   |
| ug0566     | 1223                 |                                                                                                                                                                     |                                                                                                                                        |                                                |                                                   |
| ug0567     | 538                  |                                                                                                                                                                     |                                                                                                                                        |                                                |                                                   |
| ug0568     | 778                  | GO:0005840,GO:0005198,GO:0006412                                                                                                                                    | translation                                                                                                                            | ribosome                                       | structural molecule activity                      |
| ug0569     | 597                  |                                                                                                                                                                     |                                                                                                                                        |                                                |                                                   |
| ug0570     | 699                  | GO:0005737                                                                                                                                                          |                                                                                                                                        | cytoplasm                                      |                                                   |
| ug0571     | 363                  |                                                                                                                                                                     |                                                                                                                                        |                                                |                                                   |
|            |                      | GO:0009536,GO:0005198,GO:0005840,GO:0005829,GO:0016020,GO:0006412,GO:000372                                                                                         | translation                                                                                                                            | plastid,ribosome,cytosol,membrane              | structural molecule activity,RNA binding          |
| ug0572     | 906                  |                                                                                                                                                                     |                                                                                                                                        |                                                |                                                   |
| ug0573_1   | 849                  |                                                                                                                                                                     |                                                                                                                                        |                                                |                                                   |
|            |                      | GO:0006810,GO:0016043,GO:0009987,GO:0019538,GO:0009056,GO:0003824,GO:0006629,GO:0005515,GO:0005198,GO:000528,GO:0005515,GO:0005737,GO:0006350,GO:0009987,GO:0009987 | transport,cellular component organization,cellular process,protein metabolic process,catabolic process,lipid metabolic process,protein |                                                | catalytic activity,protein binding                |
| ug0573_2   | 825                  |                                                                                                                                                                     |                                                                                                                                        |                                                |                                                   |
| ug0574     | 898                  | GO:0030528,GO:0005515,GO:0006350,GO:0009987,GO:0009987                                                                                                              | transcription                                                                                                                          | nucleus                                        | transcription regulator activity,protein binding  |
| ug0575     | 145                  | GO:0016020,GO:0009987,GO:0009536,GO:0003824,GO:0005829,GO:0008152,GO:0005215                                                                                        | photosynthesis                                                                                                                         | membrane,thylakoid,plastid                     |                                                   |
| ug0576     | 925                  |                                                                                                                                                                     | metabolic process,response to stress                                                                                                   | cytosol                                        | catalytic activity                                |
| ug0577     | 125                  |                                                                                                                                                                     |                                                                                                                                        |                                                |                                                   |
| ug0578_1   | 480                  | GO:0005829,GO:0005829,GO:0009579,GO:0009579                                                                                                                         |                                                                                                                                        | cytosol,plasma membrane                        |                                                   |
|            |                      | GO:0003674,GO:0005488,GO:0006810,GO:0016020,GO:0015979,GO:0005739,GO:0005488,GO:0008152,GO:0003824,GO:0005198,GO:0006810,GO:0005215,GO:0006810,GO:0005215           | transport,photosynthesis,generation of precursor metabolites and energy                                                                | thylakoid,plastid,membrane,mitochondrion       | molecular_function,binding                        |
| ug0578_2   | 475                  |                                                                                                                                                                     |                                                                                                                                        |                                                |                                                   |
| ug0579     | 875                  | GO:0005488,GO:0008152,GO:0003824,GO:0005198,GO:0006810,GO:0005215,GO:0006810,GO:0005215                                                                             | metabolic process                                                                                                                      |                                                | binding,catalytic activity,molecular_function     |
| ug0580     | 804                  | GO:0016020,GO:0005215,GO:0006810,GO:0005215                                                                                                                         | transport,cellular process                                                                                                             | membrane                                       | transporter activity                              |
| ug0581     | 189                  |                                                                                                                                                                     |                                                                                                                                        |                                                |                                                   |
| ug0582_1   | 599                  | GO:0005488,GO:0008150,GO:0009719                                                                                                                                    | biological_process,response to endogenous stimulus                                                                                     |                                                | binding                                           |
| ug0582_2   | 900                  |                                                                                                                                                                     |                                                                                                                                        |                                                |                                                   |
| ug0583     | 630                  | GO:0019538,GO:0009987,GO:0003824                                                                                                                                    | protein metabolic process,cellular process                                                                                             |                                                | catalytic activity                                |
| ug0584     | 775                  | GO:0019538,GO:0009987,GO:0000166,GO:0006464,GO:000166,GO:0006464                                                                                                    | protein metabolic process,catabolic process,cellular process,protein modification process                                              |                                                | nucleotide binding,catalytic activity             |
| ug0585     | 119                  |                                                                                                                                                                     |                                                                                                                                        |                                                |                                                   |
| ug0586     | 381                  |                                                                                                                                                                     |                                                                                                                                        |                                                |                                                   |
| ug0587     | 1042                 |                                                                                                                                                                     |                                                                                                                                        |                                                |                                                   |
| ug0588     | 695                  |                                                                                                                                                                     |                                                                                                                                        |                                                |                                                   |
| ug0589     | 818                  | GO:0003677,GO:0003700,GO:0005634,GO:0005488                                                                                                                         | transcription                                                                                                                          | nucleus                                        | DNA binding,transcription factor activity         |
| ug0590_1   | 779                  | GO:0005488                                                                                                                                                          |                                                                                                                                        |                                                | binding                                           |
| ug0590_2   | 748                  | GO:0005623                                                                                                                                                          |                                                                                                                                        | cell                                           |                                                   |
| ug0591_1   | 517                  |                                                                                                                                                                     |                                                                                                                                        |                                                |                                                   |
| ug0591_2   | 582                  | GO:0030528,GO:0006350,GO:0005634                                                                                                                                    | transcription                                                                                                                          | nucleus                                        | transcription regulator activity                  |
| ug0592     | 1113                 | GO:0005623,GO:0019538,GO:0009056,GO:0016020,GO:0009579,GO:0005488,GO:0009536,GO:0015979                                                                             | protein metabolic process,catabolic process                                                                                            | cell                                           | hydrolase activity                                |
| ug0593     | 829                  |                                                                                                                                                                     | photosynthesis                                                                                                                         | membrane,thylakoid,plastid                     | binding                                           |
| ug0594     | 420                  |                                                                                                                                                                     |                                                                                                                                        |                                                |                                                   |
| ug0595     | 742                  |                                                                                                                                                                     |                                                                                                                                        |                                                |                                                   |
| ug0596     | 958                  | GO:0016043,GO:0006412,GO:0008135,GO:0006412,GO:0008135                                                                                                              | cellular component organization,translation                                                                                            | mitochondrion                                  | translation factor activity, nucleic acid binding |

| Unigene ID | sequence length (bp) | GO-ID                                                                                          | Biological process                                                                                                                                  | Cellular component                       | Molecular function                                      |
|------------|----------------------|------------------------------------------------------------------------------------------------|-----------------------------------------------------------------------------------------------------------------------------------------------------|------------------------------------------|---------------------------------------------------------|
| ug0597     | 765                  | GO:0016020,GO:0005488,GO:0005737,GO:0                                                          |                                                                                                                                                     | membrane,cytoplasm                       | binding,molecular_function                              |
| ug0598     | 484                  | GO:0005739,GO:0016001,GO:0016043,GO:000987,GO:0016020,GO:0                                     | cellular component organization,cellular process                                                                                                    | mitochondrion                            | hydrolase activity                                      |
| ug0599     | 880                  | GO:0006810                                                                                     | transport                                                                                                                                           | membrane,peroxisome                      |                                                         |
| ug0600     | 691                  | GO:0016787                                                                                     |                                                                                                                                                     |                                          | hydrolase activity                                      |
| ug0601     | 827                  |                                                                                                |                                                                                                                                                     |                                          |                                                         |
| ug0602     | 138                  |                                                                                                |                                                                                                                                                     |                                          |                                                         |
| ug0603     | 483                  | GO:0005737,GO:0016001,GO:0005840,GO:0005198,GO:0006412                                         | translation                                                                                                                                         | cytoplasm                                | hydrolase activity                                      |
| ug0604     | 519                  |                                                                                                |                                                                                                                                                     | ribosome                                 | structural molecule activity                            |
| ug0605_1   | 441                  |                                                                                                |                                                                                                                                                     |                                          |                                                         |
| ug0605_2   | 559                  |                                                                                                |                                                                                                                                                     |                                          |                                                         |
| ug0606     | 639                  | GO:0009536,GO:0006091,GO:0015979,GO:0005622,GO:0005488,GO:0016020,GO:000957                    | generation of precursor metabolites and energy,photosynthesis                                                                                       | plastid,intracellular,membrane,thylakoid | binding                                                 |
| ug0607     | 400                  |                                                                                                |                                                                                                                                                     |                                          |                                                         |
| ug0608     | 208                  |                                                                                                |                                                                                                                                                     |                                          |                                                         |
| ug0609     | 1095                 | GO:0003824,GO:0009058,GO:0006519                                                               | biosynthetic process,cellular amino acid and derivative metabolic                                                                                   |                                          | catalytic activity                                      |
| ug0610     | 434                  |                                                                                                |                                                                                                                                                     |                                          |                                                         |
| ug0611     | 190                  | GO:0006259,GO:0003824,GO:0003677                                                               | DNA metabolic process                                                                                                                               |                                          | catalytic activity,DNA binding                          |
| ug0612     | 452                  | GO:0005618                                                                                     |                                                                                                                                                     | cell wall                                |                                                         |
| ug0613     | 695                  | GO:0016787,GO:0005773,GO:0005975,GO:0009056,GO:0005488                                         | carbohydrate metabolic process,catabolic process                                                                                                    | vacuole                                  | hydrolase activity,binding                              |
| ug0614_1   | 490                  |                                                                                                |                                                                                                                                                     |                                          |                                                         |
| ug0614_2   | 690                  |                                                                                                |                                                                                                                                                     |                                          |                                                         |
| ug0615     | 724                  | GO:0008289,GO:0006353                                                                          | transport                                                                                                                                           |                                          | lipid binding                                           |
| ug0616     | 353                  |                                                                                                |                                                                                                                                                     |                                          |                                                         |
| ug0617     | 753                  | GO:0009058,GO:0005975,GO:0009987,GO:0016301,GO:0003824,GO:0019538,GO:0009                      | biosynthetic process,carbohydrate metabolic process,cellular process                                                                                |                                          | kinase activity,catalytic activity,nucleotide binding   |
| ug0618     | 1050                 | 987,GO:0005515,GO:0001166,GO:0009536                                                           | protein metabolic process,cellular process                                                                                                          | plastid                                  | protein binding,nucleotide binding                      |
| ug0619     | 889                  |                                                                                                |                                                                                                                                                     |                                          |                                                         |
| ug0620     | 796                  | GO:0005737,GO:0005488,GO:0003824,GO:0008152,GO:0009058,GO:0006519,GO:000695                    | metabolic process,biosynthetic process,cellular amino acid and derivative metabolic process,response to stress,response                             | cytoplasm                                | binding,catalytic activity                              |
| ug0621     | 608                  | GO:0019538,GO:0009056,GO:0009987,GO:0                                                          | protein metabolic process,catabolic process,cellular process                                                                                        |                                          | protein binding                                         |
| ug0622     | 454                  |                                                                                                |                                                                                                                                                     |                                          |                                                         |
| ug0623     | 637                  | GO:0003676,GO:0005135                                                                          |                                                                                                                                                     | intracellular                            | nucleic acid binding                                    |
| ug0624     | 785                  | GO:0006412,GO:0008135                                                                          | translation                                                                                                                                         |                                          | translation factor activity, nucleic acid binding       |
| ug0625     | 293                  |                                                                                                |                                                                                                                                                     |                                          |                                                         |
| ug0626     | 797                  |                                                                                                |                                                                                                                                                     |                                          |                                                         |
| ug0627     | 745                  | GO:0019725,GO:0009000,GO:0000166,GO:0016301,GO:0006139,GO:0                                    | cellular homeostasis                                                                                                                                | plastid                                  | nucleotide binding,kinase activity,transferase activity |
| ug0628     | 455                  | GO:0000166,GO:0016301,GO:0006139,GO:0                                                          | nucleobase, nucleoside, nucleotide and nucleic acid metabolic process                                                                               |                                          | nucleotide binding,kinase activity,transferase activity |
| ug0629     | 444                  | GO:0000166,GO:0016301,GO:0006139,GO:0                                                          | nucleobase, nucleoside, nucleotide and nucleic acid metabolic process                                                                               |                                          | activity,transferase activity                           |
| ug0630     | 800                  |                                                                                                |                                                                                                                                                     |                                          |                                                         |
| ug0631     | 943                  | GO:0016740                                                                                     |                                                                                                                                                     |                                          | transferase activity                                    |
| ug0632     | 715                  | GO:0006950,GO:0008219,GO:0009628,GO:0007049,GO:0030234,GO:0006350,GO:0000166,GO:0009607,GO:000 | response to stress,cell death,response to abiotic stimulus,cell cycle,transcription,response to biotic stimulus                                     | nucleus,plasma membrane                  | enzyme regulator activity,nucleotide binding            |
| ug0633     | 824                  |                                                                                                |                                                                                                                                                     |                                          |                                                         |
| ug0634     | 531                  | GO:0005515                                                                                     |                                                                                                                                                     |                                          | protein binding                                         |
| ug0635     | 437                  | GO:0016020,GO:0005777,GO:0016043,GO:0009987,GO:0005739,GO:0006810,GO:0009058,GO:0006091,GO:0   | cellular component organization,cellular process                                                                                                    | membrane,peroxisome,mitochondrion        |                                                         |
| ug0636     | 458                  | GO:006139,GO:0016787,GO:0005215,GO:0016020,GO:0006810,GO:0009058,GO:0006091,GO:0               | metabolites and energy,nucleobase, nucleoside, nucleotide and nucleic acid metabolic process                                                        | membrane                                 | hydrolase activity,transporter activity                 |
| ug0637     | 531                  | GO:006139,GO:0016787,GO:0005215,GO:0016020                                                     | transport,biosynthetic process,generation of precursor metabolites and energy,nucleobase, nucleoside, nucleotide and nucleic acid metabolic process | membrane                                 | hydrolase activity,transporter activity                 |
| ug0638     | 342                  |                                                                                                |                                                                                                                                                     |                                          |                                                         |
| ug0639     | 181                  |                                                                                                |                                                                                                                                                     |                                          |                                                         |



| Unigene ID | sequence length (bp) | GO-ID                                                                                                                                                   | Biological process                                                                                                                                                                               | Cellular component              | Molecular function                                                       |
|------------|----------------------|---------------------------------------------------------------------------------------------------------------------------------------------------------|--------------------------------------------------------------------------------------------------------------------------------------------------------------------------------------------------|---------------------------------|--------------------------------------------------------------------------|
| ug0640_1   | 909                  | GO:0009536                                                                                                                                              |                                                                                                                                                                                                  | plastid                         |                                                                          |
| ug0640_2   | 1006                 | GO:0003677,GO:0006                                                                                                                                      | transcription                                                                                                                                                                                    |                                 | DNA binding                                                              |
| ug0641     | 517                  |                                                                                                                                                         |                                                                                                                                                                                                  |                                 |                                                                          |
| ug0642     | 892                  | GO:0009536                                                                                                                                              |                                                                                                                                                                                                  | plastid                         |                                                                          |
| ug0643     | 955                  | GO:0005840,GO:0005<br>198,GO:0006412                                                                                                                    | translation                                                                                                                                                                                      | ribosome                        | structural molecule activity                                             |
| ug0644     | 796                  |                                                                                                                                                         |                                                                                                                                                                                                  |                                 |                                                                          |
| ug0645     | 587                  |                                                                                                                                                         |                                                                                                                                                                                                  |                                 |                                                                          |
| ug0646     | 885                  | GO:0005488,GO:0008                                                                                                                                      | biological_process                                                                                                                                                                               |                                 | binding                                                                  |
| ug0647     | 515                  |                                                                                                                                                         |                                                                                                                                                                                                  |                                 |                                                                          |
| ug0648     | 559                  | GO:0005840,GO:0005<br>198,GO:0006412                                                                                                                    | translation                                                                                                                                                                                      | ribosome                        | structural molecule activity                                             |
| ug0649     | 453                  |                                                                                                                                                         |                                                                                                                                                                                                  |                                 |                                                                          |
| ug0650     | 1149                 | GO:0003723,GO:0005<br>737,GO:0006412,GO:0<br>GO:0009536,GO:0009                                                                                         | translation                                                                                                                                                                                      | cytoplasm                       | RNA binding,translation<br>factor activity, nucleic acid                 |
| ug0651     | 818                  | 058,GO:0009987,GO:0<br>015979,GO:0016020,G<br>O:0009579,GO:001674                                                                                       | biosynthetic process,cellular<br>process,photosynthesis                                                                                                                                          | plastid,membrane,thylakoid      | transferase activity                                                     |
| ug0652_1   | 438                  |                                                                                                                                                         |                                                                                                                                                                                                  |                                 |                                                                          |
| ug0652_2   | 686                  |                                                                                                                                                         |                                                                                                                                                                                                  |                                 |                                                                          |
| ug0653     | 413                  | GO:0016043,GO:0006<br>464,GO:0005634,GO:0                                                                                                               | cellular component<br>organization,protein modification                                                                                                                                          | nucleus                         | hydrolase activity                                                       |
| ug0654     | 1027                 | GO:0005975,GO:0003<br>824,GO:0005488,GO:0<br>006139                                                                                                     | process,nucleobase, nucleoside,<br>nucleotide and nucleic acid<br>metabolic process                                                                                                              |                                 | catalytic activity,binding                                               |
| ug0655     | 1207                 | GO:0019538,GO:0009<br>056,GO:0009987,GO:0<br>006464,GO:0009536,G<br>O:0009628,GO:000979<br>1,GO:0005634,GO:001<br>6043,GO:0005515<br>GO:0009987,GO:0005 | protein metabolic process,catabolic<br>process,cellular process,protein<br>modification process,response to<br>abiotic stimulus,post-embryonic<br>development,cellular component<br>organization | plastid,nucleus                 | protein binding                                                          |
| ug0656     | 781                  | 575,GO:0000166,GO:0<br>016043,GO:0005198,G<br>O:0016787,GO:000585                                                                                       | cellular process,cellular component<br>organization                                                                                                                                              | cellular_component,cytoskeleton | nucleotide binding,structural<br>molecule activity,hydrolase<br>activity |
| ug0657     | 550                  |                                                                                                                                                         |                                                                                                                                                                                                  |                                 |                                                                          |
| ug0658     | 552                  | GO:0005886                                                                                                                                              |                                                                                                                                                                                                  | plasma membrane                 |                                                                          |
| ug0659     | 788                  | GO:0005576                                                                                                                                              |                                                                                                                                                                                                  | extracellular region            |                                                                          |
| ug0660     | 727                  | GO:0030528,GO:0006<br>350,GO:0005634                                                                                                                    | transcription                                                                                                                                                                                    | nucleus                         | transcription regulator<br>activity                                      |
| ug0661     | 247                  |                                                                                                                                                         |                                                                                                                                                                                                  |                                 |                                                                          |
| ug0662     | 435                  |                                                                                                                                                         |                                                                                                                                                                                                  |                                 |                                                                          |
| ug0663     | 235                  |                                                                                                                                                         |                                                                                                                                                                                                  |                                 |                                                                          |
| ug0664_1   | 559                  | GO:0005840,GO:0009<br>536,GO:0005198,GO:0                                                                                                               | translation                                                                                                                                                                                      | ribosome,plastid                | structural molecule activity                                             |
| ug0664_2   | 399                  |                                                                                                                                                         |                                                                                                                                                                                                  |                                 |                                                                          |
| ug0665     | 744                  | GO:0009536                                                                                                                                              |                                                                                                                                                                                                  | plastid                         |                                                                          |
| ug0666     | 558                  |                                                                                                                                                         |                                                                                                                                                                                                  |                                 |                                                                          |
| ug0667     | 841                  | GO:0009536                                                                                                                                              |                                                                                                                                                                                                  | plastid                         |                                                                          |
| ug0668     | 896                  | GO:0016020,GO:0009<br>579,GO:0009536                                                                                                                    |                                                                                                                                                                                                  | membrane,thylakoid,plastid      |                                                                          |
| ug0669     | 612                  | GO:0006091,GO:0005<br>975,GO:0009056,GO:0<br>016301                                                                                                     | generation of precursor metabolites<br>and energy,carbohydrate metabolic<br>process,catabolic process                                                                                            |                                 | kinase activity                                                          |
| ug0670     | 505                  | GO:0006091,GO:0005<br>975,GO:0009056,GO:0<br>016301                                                                                                     | generation of precursor metabolites<br>and energy,carbohydrate metabolic<br>process,catabolic process                                                                                            |                                 | kinase activity                                                          |
| ug0671     | 375                  |                                                                                                                                                         |                                                                                                                                                                                                  |                                 |                                                                          |
| ug0672     | 266                  |                                                                                                                                                         |                                                                                                                                                                                                  |                                 |                                                                          |
| ug0673     | 641                  | GO:0005737                                                                                                                                              |                                                                                                                                                                                                  | cytoplasm                       |                                                                          |
| ug0674     | 578                  | GO:0003824,GO:0005<br>488,GO:0006464                                                                                                                    | protein modification process                                                                                                                                                                     |                                 | catalytic activity,binding                                               |
| ug0675     | 754                  |                                                                                                                                                         |                                                                                                                                                                                                  |                                 |                                                                          |
| ug0676     | 856                  | GO:0003723                                                                                                                                              |                                                                                                                                                                                                  |                                 | RNA binding                                                              |
| ug0677     | 202                  |                                                                                                                                                         |                                                                                                                                                                                                  |                                 |                                                                          |
| ug0678     | 549                  | GO:0019538,GO:0003<br>824,GO:0006464                                                                                                                    | protein metabolic process,protein<br>modification process                                                                                                                                        |                                 | catalytic activity                                                       |
| ug0679     | 261                  |                                                                                                                                                         |                                                                                                                                                                                                  |                                 |                                                                          |
| ug0680     | 617                  | GO:0030528,GO:0016<br>020,GO:0006350,GO:0<br>006810,GO:0005215,G                                                                                        | transcription,transport                                                                                                                                                                          | membrane,nucleus                | transcription regulator<br>activity,transporter activity                 |
| ug0681     | 113                  |                                                                                                                                                         |                                                                                                                                                                                                  |                                 |                                                                          |
| ug0682     | 309                  |                                                                                                                                                         |                                                                                                                                                                                                  |                                 |                                                                          |
| ug0683     | 1177                 |                                                                                                                                                         |                                                                                                                                                                                                  |                                 |                                                                          |
| ug0684     | 659                  | GO:0006810,GO:0009<br>987,GO:0005773,GO:0<br>016020,GO:0005215,G                                                                                        | transport,cellular process                                                                                                                                                                       | vacuole,membrane                | transporter activity,hydrolase<br>activity                               |

| Unigene ID | sequence length (bp) | GO-ID                                                                                                                                                                                          | Biological process                                                                                                                                                        | Cellular component                | Molecular function                                                             |
|------------|----------------------|------------------------------------------------------------------------------------------------------------------------------------------------------------------------------------------------|---------------------------------------------------------------------------------------------------------------------------------------------------------------------------|-----------------------------------|--------------------------------------------------------------------------------|
| ug0685     | 927                  | GO:0005840,GO:0009536,GO:0006412,GO:0009058,GO:0005975,GO:0009987,GO:0006629,GO:0003723,GO:0005198,GO:0005829,GO:                                                                              | translation,biosynthetic process,carbohydrate metabolic process,cellular process,lipid metabolic process                                                                  | ribosome,plastid,cytosol,membrane | RNA binding,structural molecule activity,hydrolase activity                    |
| ug0686     | 203                  |                                                                                                                                                                                                |                                                                                                                                                                           |                                   |                                                                                |
| ug0687_1   | 786                  | GO:0005840,GO:0005198,GO:0006412                                                                                                                                                               | translation                                                                                                                                                               | ribosome                          | structural molecule activity                                                   |
| ug0687_2   | 970                  | GO:0016301,GO:0005654,GO:0005739                                                                                                                                                               |                                                                                                                                                                           | nucleoplasm,mitochondrion         | kinase activity                                                                |
| ug0688     | 437                  |                                                                                                                                                                                                |                                                                                                                                                                           |                                   |                                                                                |
| ug0689     | 834                  | GO:0006950,GO:0006350,GO:0007165,GO:0009719,GO:0030528,GO:0005515,GO:0003700,GO:0005488,GO:0003676,GO:0016043,GO:0009987,GO:0006350,GO:0005622,GO:0003680,GO:0019725,GO:0009579,GO:0005622,GO: | response to stress,transcription,signal transduction,response to endogenous stimulus                                                                                      | nucleus                           | transcription regulator activity,protein binding,transcription factor activity |
| ug0690     | 911                  | GO:0005488,GO:0003676,GO:0016043,GO:0009987,GO:0006350,GO:0005622,GO:0003680,GO:0019725,GO:0009579,GO:0005622,GO:                                                                              | cellular component organization,cellular process,transcription                                                                                                            | intracellular,nucleus             | binding,nucleic acid binding,chromatin binding                                 |
| ug0691_1   | 905                  | GO:0019725,GO:0009579,GO:0005622,GO:                                                                                                                                                           | cellular homeostasis                                                                                                                                                      | thylakoid,intracellular,plastid   |                                                                                |
| ug0691_2   | 270                  |                                                                                                                                                                                                |                                                                                                                                                                           |                                   |                                                                                |
| ug0692     | 756                  |                                                                                                                                                                                                |                                                                                                                                                                           |                                   |                                                                                |
| ug0693     | 453                  | GO:0000166                                                                                                                                                                                     |                                                                                                                                                                           |                                   | nucleotide binding                                                             |
| ug0694     | 427                  |                                                                                                                                                                                                |                                                                                                                                                                           |                                   |                                                                                |
| ug0695     | 331                  |                                                                                                                                                                                                |                                                                                                                                                                           |                                   |                                                                                |
| ug0696_1   | 856                  | GO:0016020,GO:0005739,GO:0003824,GO:0005215,GO:0003674,GO:0005488,GO:0006810,GO:0005488,GO:0008152,GO:0003824,GO:                                                                              | transport,generation of precursor metabolites and energy                                                                                                                  | membrane,mitochondrion            | catalytic activity,transporter activity,molecular_function,bi                  |
| ug0696_2   | 1076                 | GO:0005488,GO:0008152,GO:0003824,GO:                                                                                                                                                           | metabolic process,response to stress                                                                                                                                      |                                   | binding,catalytic activity                                                     |
| ug0697     | 706                  |                                                                                                                                                                                                |                                                                                                                                                                           |                                   |                                                                                |
| ug0698     | 147                  |                                                                                                                                                                                                |                                                                                                                                                                           |                                   |                                                                                |
| ug0699     | 108                  |                                                                                                                                                                                                |                                                                                                                                                                           |                                   |                                                                                |
| ug0700     | 721                  |                                                                                                                                                                                                |                                                                                                                                                                           |                                   |                                                                                |
| ug0701     | 863                  | GO:0016740,GO:0009536,GO:0009058,GO:0005739,GO:0003824,GO:0008152,GO:0006091,GO:0005975,GO:0009056,GO:0005515                                                                                  | biosynthetic process,cellular amino acid and derivative metabolic process,generation of precursor metabolites and energy,carbohydrate metabolic process,catabolic process | plastid                           | transferase activity                                                           |
| ug0702     | 480                  | GO:0008152,GO:0006091,GO:0005975,GO:0009056,GO:0005515                                                                                                                                         | precursor metabolites and energy,carbohydrate metabolic process,catabolic process                                                                                         | mitochondrion                     | catalytic activity                                                             |
| ug0703     | 1112                 | GO:0005515                                                                                                                                                                                     |                                                                                                                                                                           |                                   | protein binding                                                                |
| ug0704_1   | 604                  | GO:0003824,GO:0005622,GO:0008152,GO:0006091,GO:0005975,GO:0009056,GO:0016787,GO:0005515,GO:0006350,GO:000166,GO:0005634,GO:0005488                                                             | metabolic process,generation of precursor metabolites and energy,carbohydrate metabolic process,catabolic process                                                         | intracellular                     | catalytic activity                                                             |
| ug0704_2   | 517                  | GO:0006350,GO:000166,GO:0005634,GO:0005488                                                                                                                                                     | transcription                                                                                                                                                             | nucleus,plastid                   | hydrolase activity,protein binding,nucleotide binding                          |
| ug0705     | 1123                 | GO:0005488                                                                                                                                                                                     |                                                                                                                                                                           |                                   | binding                                                                        |
| ug0706     | 936                  | GO:0019538,GO:0009056,GO:0009987                                                                                                                                                               | protein metabolic process,catabolic process,cellular process                                                                                                              |                                   |                                                                                |
| ug0707_1   | 470                  |                                                                                                                                                                                                |                                                                                                                                                                           |                                   |                                                                                |
| ug0707_2   | 839                  | GO:0009579,GO:0009536,GO:0005488,GO:                                                                                                                                                           |                                                                                                                                                                           | thylakoid,plastid                 | binding,catalytic activity                                                     |
| ug0708     | 519                  | GO:0005622                                                                                                                                                                                     |                                                                                                                                                                           | intracellular                     |                                                                                |
| ug0709     | 899                  | GO:0003677,GO:0003700,GO:0005634,GO:                                                                                                                                                           | transcription                                                                                                                                                             | nucleus                           | DNA binding,transcription factor activity                                      |
| ug0710     | 696                  |                                                                                                                                                                                                |                                                                                                                                                                           |                                   |                                                                                |
| ug0711     | 686                  |                                                                                                                                                                                                |                                                                                                                                                                           |                                   |                                                                                |
| ug0712_1   | 580                  | GO:0005488,GO:0016787,GO:0009538,GO:0009056,GO:0009987                                                                                                                                         | protein metabolic process,catabolic process,cellular process                                                                                                              |                                   | binding,transferase activity                                                   |
| ug0712_2   | 191                  |                                                                                                                                                                                                |                                                                                                                                                                           |                                   |                                                                                |
| ug0713_1   | 801                  |                                                                                                                                                                                                |                                                                                                                                                                           |                                   |                                                                                |
| ug0713_2   | 379                  |                                                                                                                                                                                                |                                                                                                                                                                           |                                   |                                                                                |
| ug0714_1   | 1050                 | GO:0005488                                                                                                                                                                                     |                                                                                                                                                                           |                                   | binding                                                                        |
| ug0714_2   | 483                  |                                                                                                                                                                                                |                                                                                                                                                                           |                                   |                                                                                |
| ug0715     | 630                  |                                                                                                                                                                                                |                                                                                                                                                                           |                                   |                                                                                |
| ug0716     | 803                  | GO:0003824,GO:0005739,GO:0006091,GO:0015979,GO:0016020,GO:0009579,GO:0006464,GO:0005488,GO:0009538,GO:0016787,GO:0009987,GO:0009056,GO:00030246,GO:0005975                                     | carbohydrate metabolic process                                                                                                                                            |                                   | catalytic activity                                                             |
| ug0717     | 823                  | GO:0006091,GO:0015979,GO:0016020,GO:0009579,GO:0006464,GO:0005488,GO:0009538,GO:0016787,GO:0009987,GO:0009056,GO:00030246,GO:0005975                                                           | generation of precursor metabolites and energy,photosynthesis,protein modification process                                                                                | membrane,thylakoid,plastid        | binding                                                                        |
| ug0718     | 870                  | GO:0016787,GO:0009987,GO:0009056,GO:00030246,GO:0005975                                                                                                                                        | cellular process,catabolic process,carbohydrate metabolic process                                                                                                         |                                   | hydrolase activity,carbohydrate binding                                        |
| ug0719     | 493                  |                                                                                                                                                                                                |                                                                                                                                                                           |                                   |                                                                                |
| ug0720     | 590                  | GO:0005739,GO:0000003,GO:0009791,GO:                                                                                                                                                           | reproduction,post-embryonic development,embryonic                                                                                                                         | mitochondrion                     |                                                                                |

| Unigene ID | sequence length (bp) | GO-ID                                                                                                           | Biological process                                                                                    | Cellular component                                | Molecular function                                                      |
|------------|----------------------|-----------------------------------------------------------------------------------------------------------------|-------------------------------------------------------------------------------------------------------|---------------------------------------------------|-------------------------------------------------------------------------|
| ug0721     | 682                  |                                                                                                                 |                                                                                                       |                                                   |                                                                         |
| ug0722     | 896                  | GO:0016020,GO:0009                                                                                              |                                                                                                       | membrane,plastid                                  |                                                                         |
| ug0723     | 460                  | GO:0005634                                                                                                      |                                                                                                       | nucleus                                           |                                                                         |
| ug0724     | 660                  | GO:0005737                                                                                                      |                                                                                                       | cytoplasm                                         |                                                                         |
| ug0725     | 543                  | GO:0005198,GO:0009<br>987,GO:0005840,GO:0<br>005829,GO:0005488,G<br>O:0006412,GO:000372                         | cellular process,translation                                                                          | ribosome,cytosol                                  | structural molecule<br>activity,binding,RNA binding                     |
| ug0726     | 642                  | GO:0003677,GO:0006                                                                                              |                                                                                                       |                                                   |                                                                         |
| ug0727     | 858                  | 350,GO:0005634                                                                                                  | transcription                                                                                         | nucleus                                           | DNA binding                                                             |
| ug0728     | 841                  | GO:0005515,GO:0005                                                                                              |                                                                                                       | intracellular                                     | protein binding                                                         |
| ug0729     | 810                  | GO:0000166,GO:0005                                                                                              |                                                                                                       |                                                   |                                                                         |
| ug0730     | 285                  | 488,GO:0003674,GO:0<br>006810,GO:0008152,G<br>O:0003824,GO:000953<br>6,GO:0009579,GO:001<br>6020,GO:0006091,GO: | transport,metabolic<br>process,generation of precursor<br>metabolites and<br>energy,photosynthesis    | plastid,thylakoid,membrane                        | nucleotide<br>binding,binding,moleculer_fu<br>nction,catalytic activity |
| ug0731     | 757                  | GO:0005840,GO:0009                                                                                              | cellular process                                                                                      | ribosome                                          |                                                                         |
| ug0732     | 316                  | GO:0005198,GO:0003                                                                                              |                                                                                                       |                                                   |                                                                         |
| ug0733     | 479                  | 723,GO:0005840,GO:0<br>005829,GO:0016020,G                                                                      | translation                                                                                           | ribosome,cytosol,membrane                         | structural molecule<br>activity,RNA binding                             |
| ug0734     | 622                  | GO:0005773,GO:0005<br>739,GO:0009536,GO:0                                                                       |                                                                                                       | vacuole,mitochondrion,plastid,plasm<br>a membrane |                                                                         |
| ug0735     | 517                  | GO:0009536                                                                                                      |                                                                                                       | plastid                                           |                                                                         |
| ug0736     | 905                  | GO:0005488,GO:0005                                                                                              |                                                                                                       |                                                   | binding,protein binding                                                 |
| ug0737_1   | 497                  | GO:0016787,GO:0030                                                                                              |                                                                                                       |                                                   | hydrolase activity,enzyme<br>regulator activity                         |
| ug0737_2   | 882                  | 234                                                                                                             |                                                                                                       |                                                   |                                                                         |
| ug0738     | 761                  | GO:0005198,GO:0005                                                                                              |                                                                                                       |                                                   |                                                                         |
| ug0739     | 335                  | 840,GO:0009536,GO:0<br>006412,GO:0003723,G<br>GO:0005488,GO:0009                                                | translation                                                                                           | ribosome,plastid,mitochondrion                    | structural molecule<br>activity,RNA binding                             |
| ug0740     | 899                  | 058,GO:0009987,GO:0<br>003824,GO:0015979                                                                        | biosynthetic process,cellular<br>process,photosynthesis                                               |                                                   | binding,catalytic activity                                              |
| ug0741     | 488                  | GO:0016301,GO:0005<br>829,GO:0000166,GO:0<br>006091,GO:0005975,G<br>GO:0005488,GO:0005                          | generation of precursor metabolites<br>and energy,carbohydrate metabolic<br>process,catabolic process | cytosol                                           | kinase activity,nucleotide<br>binding                                   |
| ug0742     | 659                  | 515,GO:0005215,GO:0<br>016020,GO:0005739,G<br>O:0006810,GO:001604                                               | transport,cellular component<br>organization,cellular process                                         | membrane,mitochondrion                            | binding,protein<br>binding,transporter activity                         |
| ug0743     | 560                  |                                                                                                                 |                                                                                                       |                                                   |                                                                         |
| ug0744_1   | 627                  |                                                                                                                 |                                                                                                       |                                                   |                                                                         |
| ug0744_2   | 671                  | GO:0005886                                                                                                      |                                                                                                       | plasma membrane                                   |                                                                         |
| ug0745     | 169                  | GO:0019538,GO:0009                                                                                              |                                                                                                       |                                                   |                                                                         |
| ug0746     | 595                  | 987,GO:0005515,GO:0<br>006950,GO:0005488,G                                                                      | protein metabolic process,cellular<br>process,response to stress                                      | plasma membrane                                   | protein binding,binding                                                 |
| ug0747     | 855                  | GO:0016020,GO:0005                                                                                              |                                                                                                       |                                                   |                                                                         |
| ug0748     | 827                  | 737,GO:0005515,GO:0<br>006810,GO:0009987,G<br>O:0005575,GO:000519                                               | transport,cellular process                                                                            | membrane,cytoplasm,cellular_comp<br>onent         | protein binding,structural<br>molecule activity                         |
| ug0749_1   | 585                  | GO:0016043,GO:0009                                                                                              | cellular component                                                                                    |                                                   |                                                                         |
| ug0749_2   | 748                  | 987,GO:0019538,GO:0<br>005515,GO:0005829                                                                        | organization,cellular<br>process,protein metabolic process                                            | cytosol                                           | protein binding                                                         |
| ug0750     | 726                  | GO:0000166,GO:0005                                                                                              |                                                                                                       |                                                   |                                                                         |
| ug0751     | 885                  | 794,GO:0006810,GO:0<br>009987,GO:0005783                                                                        | transport,cellular process                                                                            | Golgi apparatus,endoplasmic<br>reticulum          | nucleotide binding                                                      |
| ug0752     | 705                  |                                                                                                                 |                                                                                                       |                                                   |                                                                         |
| ug0753     | 233                  | GO:0003824,GO:0006                                                                                              |                                                                                                       |                                                   |                                                                         |
| ug0754     | 558                  | 810,GO:0016020,GO:0<br>005739,GO:0006091                                                                        | transport,generation of precursor<br>metabolites and energy                                           | membrane,mitochondrion                            | catalytic activity                                                      |
| ug0755     | 668                  |                                                                                                                 |                                                                                                       |                                                   |                                                                         |
| ug0756     | 740                  |                                                                                                                 |                                                                                                       |                                                   |                                                                         |
| ug0757_1   | 739                  |                                                                                                                 |                                                                                                       |                                                   |                                                                         |
| ug0757_2   | 560                  |                                                                                                                 |                                                                                                       |                                                   |                                                                         |
| ug0758     | 799                  | GO:0006091,GO:0005                                                                                              |                                                                                                       |                                                   |                                                                         |
| ug0759     | 787                  | 737,GO:0003824,GO:0<br>006810,GO:0016020,G                                                                      | generation of precursor metabolites<br>and energy,transport                                           | cytoplasm,membrane,mitochondrion                  | catalytic activity                                                      |
| ug0760     | 208                  |                                                                                                                 |                                                                                                       |                                                   |                                                                         |
| ug0761     | 420                  |                                                                                                                 |                                                                                                       |                                                   |                                                                         |

| Unigene ID | sequence length (bp) | GO-ID                                                                       | Biological process                                                                                     | Cellular component                              | Molecular function                                  |
|------------|----------------------|-----------------------------------------------------------------------------|--------------------------------------------------------------------------------------------------------|-------------------------------------------------|-----------------------------------------------------|
| ug0762     | 384                  | GO:0003824,GO:0006519,GO:0000003,GO:009791,GO:0009790                       | cellular amino acid and derivative metabolic process,reproduction,post-embryonic development,embryonic |                                                 | catalytic activity                                  |
| ug0763     | 144                  |                                                                             |                                                                                                        |                                                 |                                                     |
| ug0764     | 954                  |                                                                             |                                                                                                        |                                                 |                                                     |
| ug0765     | 499                  | GO:0016787                                                                  |                                                                                                        |                                                 | hydrolase activity                                  |
| ug0766     | 661                  |                                                                             |                                                                                                        |                                                 |                                                     |
| ug0767     | 1033                 | GO:0005886,GO:0009                                                          |                                                                                                        | plasma membrane,plastid                         |                                                     |
| ug0768     | 1169                 |                                                                             |                                                                                                        |                                                 |                                                     |
| ug0769     | 879                  | GO:0009536                                                                  |                                                                                                        | plastid                                         |                                                     |
| ug0770     | 650                  | GO:0005576,GO:0030246,GO:0005975,GO:0005737,GO:0006                         | carbohydrate metabolic process                                                                         | extracellular region                            | carbohydrate binding,hydrolase activity transferase |
| ug0771     | 843                  | 350,GO:0016740,GO:003700,GO:0005634                                         | transcription                                                                                          | cytoplasm,nucleus                               | activity,transcription factor activity              |
| ug0772     | 487                  |                                                                             |                                                                                                        |                                                 |                                                     |
| ug0773     | 405                  |                                                                             |                                                                                                        |                                                 |                                                     |
| ug0774_1   | 544                  | GO:0006464,GO:0006519,GO:0005794,GO:005886,GO:0005488,GO:0003824,GO:000815  | process,cellular amino acid and derivative metabolic process,metabolic process                         | Golgi apparatus,plasma membrane                 | binding,catalytic activity                          |
| ug0774_2   | 510                  | GO:0006464,GO:0006519,GO:0005794,GO:005886,GO:0005488,GO:0003824,GO:000815  | process,cellular amino acid and derivative metabolic process,metabolic process                         | Golgi apparatus,plasma membrane                 | binding,catalytic activity                          |
| ug0775     | 545                  | GO:0005623,GO:0006950,GO:0006259,GO:0                                       | response to stress,DNA metabolic process                                                               | cell                                            | DNA binding                                         |
| ug0776     | 771                  |                                                                             |                                                                                                        |                                                 |                                                     |
| ug0777     | 902                  | GO:0030528,GO:0016043,GO:0006350,GO:0                                       | cellular component organization,transcription                                                          | nucleoplasm                                     | transcription regulator activity                    |
| ug0778     | 1135                 |                                                                             |                                                                                                        |                                                 |                                                     |
| ug0779     | 600                  | GO:0005886                                                                  |                                                                                                        | plasma membrane                                 |                                                     |
| ug0780     | 811                  |                                                                             |                                                                                                        |                                                 |                                                     |
| ug0781     | 460                  |                                                                             |                                                                                                        |                                                 |                                                     |
| ug0782     | 1085                 |                                                                             |                                                                                                        |                                                 |                                                     |
| ug0783_1   | 812                  |                                                                             |                                                                                                        |                                                 |                                                     |
| ug0783_2   | 734                  |                                                                             |                                                                                                        |                                                 |                                                     |
| ug0784     | 486                  | GO:0005515,GO:0005635,GO:0008219,GO:0016020,GO:0007165,GO:0006950,GO:000960 | cell death,signal transduction,response to stress,response to biotic stimulus                          | nuclear envelope,membrane,endoplasmic reticulum | protein binding                                     |
| ug0785     | 566                  | GO:0005515,GO:0005635,GO:0008219,GO:0016020,GO:0007165,GO:0006950,GO:000960 | cell death,signal transduction,response to stress,response to biotic stimulus                          | nuclear envelope,membrane,endoplasmic reticulum | protein binding                                     |
| ug0786_1   | 257                  |                                                                             |                                                                                                        |                                                 |                                                     |
| ug0786_2   | 870                  |                                                                             |                                                                                                        |                                                 |                                                     |
| ug0787     | 553                  |                                                                             |                                                                                                        |                                                 |                                                     |
| ug0788     | 684                  | GO:0005634,GO:0000003,GO:0009791                                            | reproduction,post-embryonic development                                                                | nucleus                                         |                                                     |
| ug0789     | 848                  | GO:0006139,GO:0009058,GO:0016301                                            | nucleobase, nucleoside, nucleotide and nucleic acid metabolic process,biosynthetic process             |                                                 | kinase activity                                     |
| ug0790     | 564                  | GO:0005623,GO:0016020,GO:0005737                                            |                                                                                                        | cell,membrane,cytoplasm                         |                                                     |
| ug0791     | 827                  |                                                                             |                                                                                                        |                                                 |                                                     |
| ug0792     | 738                  | GO:0005730,GO:0005622,GO:0009987                                            | cellular process                                                                                       | nucleolus,intracellular                         |                                                     |
| ug0793     | 559                  | GO:0016020,GO:0005739,GO:0006091,GO:0                                       | generation of precursor metabolites and energy,transport                                               | membrane,mitochondrion                          |                                                     |
| ug0794_1   | 920                  |                                                                             |                                                                                                        |                                                 |                                                     |
| ug0794_2   | 270                  |                                                                             |                                                                                                        |                                                 |                                                     |
| ug0795     | 926                  |                                                                             |                                                                                                        |                                                 |                                                     |
| ug0796     | 1025                 | GO:0005488,GO:0005                                                          |                                                                                                        |                                                 | binding,protein binding                             |
| ug0797     | 564                  |                                                                             |                                                                                                        |                                                 |                                                     |
| ug0798     | 570                  | GO:0000166,GO:0006                                                          | response to stress                                                                                     |                                                 | nucleotide binding                                  |
| ug0799     | 445                  |                                                                             |                                                                                                        |                                                 |                                                     |
| ug0800     | 810                  | GO:0016020,GO:0007                                                          | signal transduction                                                                                    | membrane                                        |                                                     |
| ug0801     | 555                  |                                                                             |                                                                                                        |                                                 |                                                     |
| ug0802     | 906                  | GO:0019725,GO:0003824,GO:0008152,GO:0                                       | cellular homeostasis,metabolic process                                                                 | plastid                                         | catalytic activity                                  |
| ug0803     | 488                  |                                                                             |                                                                                                        |                                                 |                                                     |
| ug0804     | 973                  | GO:0003677,GO:0003700,GO:0005634,GO:0                                       | transcription                                                                                          | nucleus                                         | DNA binding,transcription factor activity           |
| ug0805     | 967                  | GO:0005886,GO:0016787,GO:0008152                                            | metabolic process                                                                                      | plasma membrane                                 | hydrolase activity                                  |
| ug0806     | 503                  | GO:0005840,GO:0005198,GO:0006412                                            | translation                                                                                            | ribosome                                        | structural molecule activity                        |

| Unigene ID | sequence length (bp) | GO-ID                                                                                                                               | Biological process                                                                                                                                                                                   | Cellular component                        | Molecular function                                            |
|------------|----------------------|-------------------------------------------------------------------------------------------------------------------------------------|------------------------------------------------------------------------------------------------------------------------------------------------------------------------------------------------------|-------------------------------------------|---------------------------------------------------------------|
| ug0807     | 1015                 | GO:0005488,GO:0008152,GO:0003824,GO:0003674,GO:0005739,G                                                                            | metabolic process                                                                                                                                                                                    | mitochondrion                             | binding,catalytic activity,molecular_function,oxygen binding  |
| ug0808_1   | 696                  |                                                                                                                                     |                                                                                                                                                                                                      |                                           |                                                               |
| ug0808_2   | 916                  | GO:0006810,GO:0009987,GO:0016020,GO:0                                                                                               | transport,cellular process                                                                                                                                                                           | membrane,endosome                         |                                                               |
| ug0809     | 546                  |                                                                                                                                     |                                                                                                                                                                                                      |                                           |                                                               |
| ug0810     | 619                  |                                                                                                                                     |                                                                                                                                                                                                      |                                           |                                                               |
| ug0811     | 599                  | GO:0016020,GO:0009579,GO:0006810,GO:0006091,GO:0015979,GO:0006464,GO:0005488,GO:0009607,GO:0007165,GO:0006950,GO:0009628,GO:0030234 | transport,generation of precursor metabolites and energy,photosynthesis,protein modification process response to biotic stimulus,signal transduction,response to stress,response to abiotic stimulus | membrane,thylakoid,plastid                | binding                                                       |
| ug0812_1   | 879                  |                                                                                                                                     |                                                                                                                                                                                                      |                                           | enzyme regulator activity                                     |
| ug0812_2   | 855                  |                                                                                                                                     |                                                                                                                                                                                                      |                                           |                                                               |
| ug0813     | 888                  | GO:0019538,GO:0009987,GO:0016020                                                                                                    | protein metabolic process,cellular process                                                                                                                                                           | membrane                                  |                                                               |
| ug0814     | 350                  |                                                                                                                                     |                                                                                                                                                                                                      |                                           |                                                               |
| ug0815     | 781                  | GO:0005856,GO:0003774,GO:0009987                                                                                                    | cellular process                                                                                                                                                                                     | cytoskeleton                              | motor activity                                                |
| ug0816_1   | 675                  | GO:0005739                                                                                                                          |                                                                                                                                                                                                      | mitochondrion                             |                                                               |
| ug0816_2   | 898                  |                                                                                                                                     |                                                                                                                                                                                                      |                                           |                                                               |
| ug0817     | 696                  | GO:0005886,GO:0005802,GO:0005737                                                                                                    |                                                                                                                                                                                                      | plasma membrane,vacuole cytoplasm         |                                                               |
| ug0818     | 802                  |                                                                                                                                     |                                                                                                                                                                                                      |                                           |                                                               |
| ug0819     | 269                  |                                                                                                                                     |                                                                                                                                                                                                      |                                           |                                                               |
| ug0820     | 379                  |                                                                                                                                     |                                                                                                                                                                                                      |                                           |                                                               |
| ug0821     | 920                  | GO:0005622,GO:0003920,GO:0008219,GO:0005515,GO:0006464                                                                              | cell death,protein modification process                                                                                                                                                              | intracellular                             | DNA binding protein binding                                   |
| ug0822_1   | 1111                 |                                                                                                                                     |                                                                                                                                                                                                      |                                           |                                                               |
| ug0822_2   | 843                  | GO:0005623                                                                                                                          |                                                                                                                                                                                                      | cell                                      |                                                               |
| ug0823     | 750                  |                                                                                                                                     |                                                                                                                                                                                                      |                                           |                                                               |
| ug0824     | 594                  | GO:0005840,GO:0005198,GO:0006412                                                                                                    | translation                                                                                                                                                                                          | ribosome                                  | structural molecule activity                                  |
| ug0825     | 784                  | GO:0005737,GO:0006722,GO:0005737                                                                                                    | response to stress                                                                                                                                                                                   | cytoplasm cytoplasm                       |                                                               |
| ug0826_1   | 1115                 | GO:0016020,GO:0005215,GO:0006810                                                                                                    | transport                                                                                                                                                                                            | membrane                                  | transporter activity                                          |
| ug0826_2   | 1115                 |                                                                                                                                     |                                                                                                                                                                                                      |                                           |                                                               |
| ug0827     | 746                  | GO:0019725,GO:0003674,GO:0003824                                                                                                    | cellular homeostasis                                                                                                                                                                                 |                                           | molecular_function,catalytic activity                         |
| ug0828     | 402                  |                                                                                                                                     |                                                                                                                                                                                                      |                                           |                                                               |
| ug0829     | 716                  | GO:0009056,GO:0006519,GO:0003824,GO:000166,GO:0005488,GO:0005737,GO:000573                                                          | catabolic process,cellular amino acid and derivative metabolic process                                                                                                                               | cytoplasm,mitochondrion                   | catalytic activity,nucleotide binding,protein binding         |
| ug0830     | 959                  |                                                                                                                                     |                                                                                                                                                                                                      |                                           |                                                               |
| ug0831     | 550                  |                                                                                                                                     |                                                                                                                                                                                                      |                                           |                                                               |
| ug0832     | 717                  | GO:0006412,GO:0008135                                                                                                               | translation                                                                                                                                                                                          |                                           | translation factor activity, nucleic acid binding             |
| ug0833     | 628                  | GO:0005623,GO:00051166                                                                                                              |                                                                                                                                                                                                      | cell,mitochondrion                        |                                                               |
| ug0834     | 1166                 |                                                                                                                                     |                                                                                                                                                                                                      |                                           |                                                               |
| ug0835     | 733                  | GO:0005198,GO:0005840,GO:0006412                                                                                                    | translation                                                                                                                                                                                          | ribosome                                  | structural molecule activity                                  |
| ug0836     | 699                  | GO:0005198,GO:0005840,GO:0006412                                                                                                    | translation                                                                                                                                                                                          | ribosome                                  | structural molecule activity                                  |
| ug0837     | 799                  | GO:0016020,GO:0009579,GO:0009536                                                                                                    |                                                                                                                                                                                                      | membrane,thylakoid,plastid                |                                                               |
| ug0838_1   | 875                  |                                                                                                                                     |                                                                                                                                                                                                      |                                           |                                                               |
| ug0838_2   | 613                  |                                                                                                                                     |                                                                                                                                                                                                      |                                           |                                                               |
| ug0839     | 848                  |                                                                                                                                     |                                                                                                                                                                                                      |                                           |                                                               |
| ug0840     | 546                  | GO:0005840,GO:0005198,GO:0005488,GO:0005886,GO:0005956,GO:0016787                                                                   | translation protein metabolic process,catabolic process                                                                                                                                              | ribosome plasma membrane                  | structural molecule activity,protein binding receptor binding |
| ug0841     | 593                  |                                                                                                                                     |                                                                                                                                                                                                      |                                           |                                                               |
| ug0842     | 526                  |                                                                                                                                     |                                                                                                                                                                                                      |                                           | hydrolase activity                                            |
| ug0843     | 596                  | GO:0005739                                                                                                                          |                                                                                                                                                                                                      | mitochondrion                             |                                                               |
| ug0844     | 963                  | GO:0005618,GO:0005515,GO:0005886,GO:0009536,GO:0005634,GO:0007165,GO:000971                                                         | signal transduction,response to endogenous stimulus                                                                                                                                                  | cell wall,plasma membrane,plastid,nucleus | protein binding                                               |
| ug0845     | 119                  |                                                                                                                                     |                                                                                                                                                                                                      |                                           |                                                               |
| ug0846     | 642                  |                                                                                                                                     |                                                                                                                                                                                                      |                                           |                                                               |
| ug0847     | 896                  | GO:0005634,GO:0003920,GO:0006091,GO:0005975,GO:0009056,GO:0003824                                                                   | generation of precursor metabolites and energy,carbohydrate metabolic process,catabolic process                                                                                                      | nucleus                                   | DNA binding                                                   |
| ug0848_1   | 775                  |                                                                                                                                     |                                                                                                                                                                                                      |                                           | catalytic activity                                            |
| ug0848_2   | 667                  |                                                                                                                                     |                                                                                                                                                                                                      |                                           |                                                               |
| ug0849_1   | 851                  | GO:0003824,GO:0009058,GO:0006519                                                                                                    | biosynthetic process,cellular amino acid and derivative metabolic                                                                                                                                    |                                           | catalytic activity                                            |

| Unigene ID | sequence length (bp) | GO-ID                                                                                                                                                                                                       | Biological process                                                                                                                                                                                              | Cellular component                       | Molecular function                                                      |
|------------|----------------------|-------------------------------------------------------------------------------------------------------------------------------------------------------------------------------------------------------------|-----------------------------------------------------------------------------------------------------------------------------------------------------------------------------------------------------------------|------------------------------------------|-------------------------------------------------------------------------|
| ug0849_2   | 796                  | GO:0003824,GO:0009058,GO:0009987,GO:0006629,GO:0019748                                                                                                                                                      | biosynthetic process,cellular process,lipid metabolic process,secondary metabolic                                                                                                                               |                                          | catalytic activity                                                      |
| ug0850     | 982                  | GO:0006950                                                                                                                                                                                                  | response to stress                                                                                                                                                                                              |                                          |                                                                         |
| ug0851     | 567                  | GO:0005623,GO:0016787,GO:0006629                                                                                                                                                                            | lipid metabolic process                                                                                                                                                                                         | cell                                     | hydrolase activity                                                      |
| ug0852     | 812                  |                                                                                                                                                                                                             |                                                                                                                                                                                                                 |                                          |                                                                         |
| ug0853     | 568                  | GO:0005488                                                                                                                                                                                                  |                                                                                                                                                                                                                 |                                          | binding                                                                 |
| ug0854     | 822                  | GO:0009536                                                                                                                                                                                                  |                                                                                                                                                                                                                 | plastid                                  |                                                                         |
| ug0855     | 620                  | GO:0019725,GO:0003                                                                                                                                                                                          | cellular homeostasis                                                                                                                                                                                            |                                          | catalytic activity                                                      |
| ug0856     | 707                  | GO:0005739,GO:0006950,GO:0016020                                                                                                                                                                            | response to stress                                                                                                                                                                                              | mitochondrion,membrane                   |                                                                         |
| ug0857     | 396                  |                                                                                                                                                                                                             |                                                                                                                                                                                                                 |                                          |                                                                         |
| ug0858     | 1043                 |                                                                                                                                                                                                             |                                                                                                                                                                                                                 |                                          |                                                                         |
| ug0859     | 697                  |                                                                                                                                                                                                             |                                                                                                                                                                                                                 |                                          |                                                                         |
| ug0860_1   | 909                  |                                                                                                                                                                                                             |                                                                                                                                                                                                                 |                                          |                                                                         |
| ug0860_2   | 667                  | GO:0016740,GO:0005829,GO:0003824,GO:0005488,GO:0006091,GO:0005975,GO:000905                                                                                                                                 | generation of precursor metabolites and energy,carbohydrate metabolic process,catabolic process                                                                                                                 | cytosol                                  | transferase activity,catalytic activity,binding                         |
| ug0861     | 870                  |                                                                                                                                                                                                             |                                                                                                                                                                                                                 |                                          |                                                                         |
| ug0862     | 1134                 | GO:0005488                                                                                                                                                                                                  |                                                                                                                                                                                                                 |                                          | binding                                                                 |
| ug0863     | 902                  | GO:0005215,GO:0006                                                                                                                                                                                          | transport                                                                                                                                                                                                       |                                          | transporter activity                                                    |
| ug0864     | 513                  |                                                                                                                                                                                                             |                                                                                                                                                                                                                 |                                          |                                                                         |
| ug0865     | 543                  | GO:0016740                                                                                                                                                                                                  |                                                                                                                                                                                                                 |                                          | transferase activity                                                    |
| ug0866     | 801                  |                                                                                                                                                                                                             |                                                                                                                                                                                                                 |                                          |                                                                         |
| ug0867     | 732                  | GO:0006950,GO:0009058,GO:0006519,GO:0019748                                                                                                                                                                 | response to stress,biosynthetic process,cellular amino acid and derivative metabolic process,secondary metabolic                                                                                                |                                          |                                                                         |
| ug0868     | 844                  |                                                                                                                                                                                                             |                                                                                                                                                                                                                 |                                          |                                                                         |
| ug0869     | 929                  | GO:0005576,GO:0016043,GO:0009987,GO:000                                                                                                                                                                     | cellular component organization,cellular process                                                                                                                                                                | extracellular region,membrane            |                                                                         |
| ug0870     | 1336                 | GO:0000166,GO:0009GO:0005840,GO:0019                                                                                                                                                                        |                                                                                                                                                                                                                 | plastid                                  | nucleotide binding                                                      |
| ug0871_1   | 884                  | 538,GO:0009987,GO:0005783,GO:0005198,GO:0005737,GO:0005488,GO:0000166,GO:000                                                                                                                                | protein metabolic process,cellular process,translation                                                                                                                                                          | ribosome,endoplasmic reticulum,cytoplasm | structural molecule activity,binding,nucleotide binding,protein binding |
| ug0871_2   | 569                  |                                                                                                                                                                                                             |                                                                                                                                                                                                                 |                                          |                                                                         |
| ug0872     | 842                  | GO:0005198,GO:0005840,GO:0006412                                                                                                                                                                            | translation                                                                                                                                                                                                     | ribosome                                 | structural molecule activity                                            |
| ug0873     | 932                  | GO:0000166,GO:0005794,GO:0006810,GO:0009987,GO:0006464,GO:0009536,GO:000716GO:0005215,GO:0016020,GO:0005739,GO:0006950,GO:0009628,GO:0006810,GO:0009058,GO:0006091,GO:0006139,GO:0016787,GO:0019725,GO:0006 | transport,cellular process,protein modification process,signal transduction                                                                                                                                     | Golgi apparatus,plastid                  | nucleotide binding,transporter activity                                 |
| ug0874     | 621                  | GO:0005215,GO:0016020,GO:0005739,GO:0006950,GO:0009628,GO:0006810,GO:0009058,GO:0006091,GO:0006139,GO:0016787,GO:0019725,GO:0006                                                                            | response to stress,response to abiotic stimulus,transport,biosynthetic process,generation of precursor metabolites and energy,nucleobase, nucleoside, nucleotide and nucleic cellular homeostasis,generation of | membrane,mitochondrion                   | transporter activity,hydrolase activity                                 |
| ug0875     | 631                  | GO:0005737,GO:0003674,GO:0003824,GO:0016020,GO:0006810,GO:0006                                                                                                                                              | precursor metabolites and energy,transport                                                                                                                                                                      | cytoplasm                                | molecular_function,catalytic activity                                   |
| ug0876_1   | 452                  | GO:0016020,GO:0006810,GO:0005215                                                                                                                                                                            | transport                                                                                                                                                                                                       | membrane                                 | transporter activity                                                    |
| ug0876_2   | 1130                 | GO:0019538,GO:0009987,GO:0005515,GO:000166,GO:0006950                                                                                                                                                       | protein metabolic process,cellular process,response to stress                                                                                                                                                   |                                          | protein binding,nucleotide binding                                      |
| ug0877_1   | 871                  | GO:0006810,GO:0016020,GO:0005215                                                                                                                                                                            | transport                                                                                                                                                                                                       | membrane                                 | transporter activity                                                    |
| ug0877_2   | 1061                 | GO:0005198,GO:0005840,GO:0006412,GO:0                                                                                                                                                                       | translation                                                                                                                                                                                                     | ribosome                                 | structural molecule activity,RNA binding                                |
| ug0878     | 669                  | GO:0005623                                                                                                                                                                                                  |                                                                                                                                                                                                                 | cell                                     |                                                                         |
| ug0879     | 430                  |                                                                                                                                                                                                             |                                                                                                                                                                                                                 |                                          |                                                                         |
| ug0880     | 591                  | GO:0005488,GO:0009058,GO:0006519,GO:0                                                                                                                                                                       | biosynthetic process,cellular amino acid and derivative metabolic                                                                                                                                               |                                          | binding,catalytic activity                                              |
| ug0881     | 622                  |                                                                                                                                                                                                             |                                                                                                                                                                                                                 |                                          |                                                                         |
| ug0882     | 689                  | GO:0005739,GO:0016020,GO:0005622                                                                                                                                                                            |                                                                                                                                                                                                                 | mitochondrion,membrane,intracellular     |                                                                         |
| ug0883     | 841                  |                                                                                                                                                                                                             |                                                                                                                                                                                                                 |                                          |                                                                         |
| ug0884     | 576                  |                                                                                                                                                                                                             |                                                                                                                                                                                                                 |                                          |                                                                         |
| ug0885_1   | 1116                 |                                                                                                                                                                                                             |                                                                                                                                                                                                                 |                                          |                                                                         |
| ug0885_2   | 888                  | GO:0006091,GO:0015979,GO:0016020,GO:0009579,GO:0005488,GO:0006464,GO:000953GO:0008152,GO:0003824,GO:0005488                                                                                                 | generation of precursor metabolites and energy,photosynthesis,protein modification process                                                                                                                      | membrane,thylakoid,plastid               | binding                                                                 |
| ug0886     | 1173                 |                                                                                                                                                                                                             | metabolic process                                                                                                                                                                                               |                                          | catalytic activity,binding                                              |

| Unigene ID | sequence length (bp) | GO-ID                                                                                                                                                                                                                                            | Biological process                                                                                                                                     | Cellular component                       | Molecular function                                                                                  |
|------------|----------------------|--------------------------------------------------------------------------------------------------------------------------------------------------------------------------------------------------------------------------------------------------|--------------------------------------------------------------------------------------------------------------------------------------------------------|------------------------------------------|-----------------------------------------------------------------------------------------------------|
| ug0887     | 635                  | GO:0016787,GO:0005575,GO:0019538,GO:0009056,GO:0000166,GO:0005634,GO:000582                                                                                                                                                                      | protein metabolic process,catabolic process                                                                                                            | cellular_component,nucleus,cytosol       | hydrolase activity,nucleotide binding                                                               |
| ug0888     | 372                  | GO:0016787,GO:0019538,GO:0009056,GO:0009987,GO:0005634                                                                                                                                                                                           | protein metabolic process,catabolic process,cellular process                                                                                           | nucleus                                  | hydrolase activity                                                                                  |
| ug0890     | 642                  | GO:0005515,GO:0005812                                                                                                                                                                                                                            |                                                                                                                                                        | intracellular                            | protein binding                                                                                     |
| ug0891     | 812                  | GO:0019725,GO:0003824,GO:0005488,GO:0005886,GO:0006006,GO:0005730,GO:0005198,GO:0000003,GO:0009791,GO:0009790,GO:0005840,GO:0005829,GO:0006412,GO:000806                                                                                         | cellular homeostasis,transport                                                                                                                         |                                          | catalytic activity,binding                                                                          |
| ug0892     | 456                  | GO:0019725,GO:0003824,GO:0005488,GO:0005886,GO:0006006,GO:0005730,GO:0005198,GO:0000003,GO:0009791,GO:0009790,GO:0005840,GO:0005829,GO:0006412,GO:000806                                                                                         | response to stress                                                                                                                                     | plasma membrane                          |                                                                                                     |
| ug0893     | 971                  | GO:0005886,GO:0006006,GO:0005730,GO:0005198,GO:0000003,GO:0009791,GO:0009790,GO:0005840,GO:0005829,GO:0006412,GO:000806                                                                                                                          | reproduction,post-embryonic development,embryonic development,translation                                                                              | nucleolus,ribosome,cytosol,mitochondrion | structural molecule activity                                                                        |
| ug0894_1   | 772                  | GO:0005840,GO:0005829,GO:0006412,GO:000806                                                                                                                                                                                                       |                                                                                                                                                        |                                          |                                                                                                     |
| ug0894_2   | 806                  | GO:0005739,GO:0009807,GO:0006810                                                                                                                                                                                                                 | transport                                                                                                                                              | mitochondrion,plastid                    |                                                                                                     |
| ug0895     | 586                  | GO:0005739,GO:0009807,GO:0006810                                                                                                                                                                                                                 |                                                                                                                                                        |                                          |                                                                                                     |
| ug0896     | 807                  | GO:0006810                                                                                                                                                                                                                                       | transport                                                                                                                                              |                                          |                                                                                                     |
| ug0897     | 647                  |                                                                                                                                                                                                                                                  |                                                                                                                                                        |                                          |                                                                                                     |
| ug0898     | 694                  |                                                                                                                                                                                                                                                  |                                                                                                                                                        |                                          |                                                                                                     |
| ug0899     | 126                  |                                                                                                                                                                                                                                                  |                                                                                                                                                        |                                          |                                                                                                     |
| ug0900     | 812                  | GO:0003824,GO:0016740,GO:0009058,GO:0009987,GO:0005515,GO:0005488,GO:0009536,GO:0005634,GO:0005737,GO:0005739,GO:000999                                                                                                                          | biosynthetic process,cellular process,catabolic process,cellular amino acid and derivative metabolic process                                           | plastid,nucleus,cytoplasm,mitochondrion  | catalytic activity,transferase activity,protein binding,protein binding                             |
| ug0901     | 999                  |                                                                                                                                                                                                                                                  |                                                                                                                                                        |                                          |                                                                                                     |
| ug0902     | 729                  |                                                                                                                                                                                                                                                  |                                                                                                                                                        |                                          |                                                                                                     |
| ug0903     | 991                  | GO:0019725,GO:0005488,GO:0005886                                                                                                                                                                                                                 | cellular homeostasis                                                                                                                                   | plasma membrane                          | binding                                                                                             |
| ug0904     | 526                  |                                                                                                                                                                                                                                                  |                                                                                                                                                        |                                          |                                                                                                     |
| ug0905     | 604                  | GO:0016740,GO:0003824,GO:0006350,GO:0005634,GO:0005488                                                                                                                                                                                           | transcription                                                                                                                                          | nucleus                                  | transferase activity,DNA binding,protein binding                                                    |
| ug0906     | 697                  |                                                                                                                                                                                                                                                  |                                                                                                                                                        |                                          |                                                                                                     |
| ug0907     | 580                  |                                                                                                                                                                                                                                                  |                                                                                                                                                        |                                          |                                                                                                     |
| ug0908     | 1006                 | GO:0006810,GO:000999                                                                                                                                                                                                                             | transport,cellular process                                                                                                                             |                                          |                                                                                                     |
| ug0909     | 1226                 | GO:0005576,GO:000999                                                                                                                                                                                                                             |                                                                                                                                                        | extracellular region,plastid             |                                                                                                     |
| ug0910     | 1118                 | GO:0016787,GO:000999                                                                                                                                                                                                                             |                                                                                                                                                        | plastid                                  | hydrolase activity                                                                                  |
| ug0911     | 798                  |                                                                                                                                                                                                                                                  |                                                                                                                                                        |                                          |                                                                                                     |
| ug0912     | 1236                 | GO:0005488,GO:0008152,GO:0003824,GO:0003674,GO:0006950                                                                                                                                                                                           | metabolic process,response to stress                                                                                                                   |                                          | binding,catalytic activity,molecular_function                                                       |
| ug0913     | 614                  |                                                                                                                                                                                                                                                  |                                                                                                                                                        |                                          |                                                                                                     |
| ug0914     | 308                  | GO:0003824,GO:0006810,GO:0016020,GO:0006091,GO:0005739                                                                                                                                                                                           | transport,generation of precursor metabolites and energy                                                                                               | membrane,mitochondrion                   | catalytic activity                                                                                  |
| ug0915     | 1152                 | GO:0003824,GO:000818                                                                                                                                                                                                                             | metabolic process                                                                                                                                      |                                          | catalytic activity                                                                                  |
| ug0916     | 818                  | GO:0005622                                                                                                                                                                                                                                       |                                                                                                                                                        | intracellular                            |                                                                                                     |
| ug0917     | 682                  | GO:0016787,GO:0003824,GO:0000166,GO:0008135,GO:0006412                                                                                                                                                                                           | translation                                                                                                                                            |                                          | hydrolase activity,RNA binding,nucleotide binding,translation factor activity, nucleic acid binding |
| ug0918     | 1007                 | GO:0005198,GO:0005840,GO:0006412,GO:0006091,GO:0016787,GO:0003824,GO:0000166,GO:0008135,GO:0006412                                                                                                                                               | translation                                                                                                                                            | ribosome                                 | structural molecule activity                                                                        |
| ug0919     | 993                  | GO:0005622,GO:0003824,GO:0005488,GO:0006810,GO:0005739,GO:0009058,GO:0005975,GO:0015979,GO:0016301,GO:0005739,GO:0009579,GO:0000166,GO:0006091,GO:0009056,GO:0009536,GO:0005488,GO:0005155,GO:0005215,GO:0016020,GO:0005739,GO:0006810,GO:001604 | generation of precursor metabolites and energy,transport                                                                                               | membrane,intracellular,mitochondrion     | catalytic activity,protein binding                                                                  |
| ug0920     | 1035                 | GO:0005622,GO:0003824,GO:0005488,GO:0006810,GO:0005739,GO:0009058,GO:0005975,GO:0015979,GO:0016301,GO:0005739,GO:0009579,GO:0000166,GO:0006091,GO:0009056,GO:0009536,GO:0005488,GO:0005155,GO:0005215,GO:0016020,GO:0005739,GO:0006810,GO:001604 | biosynthetic process,carbohydrate metabolic process,photosynthesis,generation of precursor metabolites and energy,catabolic process,biological process | mitochondrion,thylakoid,plastid,membrane | kinase activity,nucleotide binding                                                                  |
| ug0921     | 637                  | GO:0005155,GO:0005215,GO:0016020,GO:0005739,GO:0006810,GO:001604                                                                                                                                                                                 | transport,cellular component organization,cellular process                                                                                             | membrane,mitochondrion                   | binding,protein binding,transporter activity                                                        |
| ug0922     | 1212                 | GO:0008135,GO:0016787,GO:0000166                                                                                                                                                                                                                 |                                                                                                                                                        |                                          | translation factor activity, nucleic acid binding,hydrolase activity, nucleic acid binding          |
| ug0923     | 782                  | GO:0006412,GO:0008135                                                                                                                                                                                                                            | translation                                                                                                                                            |                                          | translation factor activity, nucleic acid binding                                                   |
| ug0924     | 728                  | GO:0019538,GO:000999,GO:0009987,GO:0005634,GO:000582                                                                                                                                                                                             | protein metabolic process,catabolic process,cellular process                                                                                           |                                          | protein binding                                                                                     |

| Unigene ID | sequence length (bp) | GO-ID                                                                    | Biological process                                                                                                                                  | Cellular component                              | Molecular function                                     |
|------------|----------------------|--------------------------------------------------------------------------|-----------------------------------------------------------------------------------------------------------------------------------------------------|-------------------------------------------------|--------------------------------------------------------|
| ug0925     | 906                  | GO:0016787,GO:0005886,GO:0019538,GO:009987,GO:0009056,G                  | protein metabolic process,cellular process,catabolic process                                                                                        | plasma membrane,endoplasmic reticulum           | hydrolase activity                                     |
| ug0926     | 871                  | GO:0016020,GO:0009579,GO:0009536                                         |                                                                                                                                                     | membrane,thylakoid,plastid                      |                                                        |
| ug0927     | 1005                 | GO:0004872,GO:0005488,GO:0009987,GO:016020,GO:0005783,G                  | cellular process,transport                                                                                                                          | membrane,endoplasmic reticulum,mitochondrion    | receptor activity,binding                              |
| ug0928     | 1541                 | O:0005739,GO:000681GO:0016020,GO:0005215,GO:0006810,GO:0                 | transport,cellular process                                                                                                                          | membrane                                        | transporter activity                                   |
| ug0929     | 847                  | GO:0016020,GO:0009579,GO:0009536,GO:0                                    | photosynthesis                                                                                                                                      | membrane,thylakoid,plastid                      |                                                        |
| ug0930     | 935                  |                                                                          |                                                                                                                                                     |                                                 |                                                        |
| ug0931     | 711                  |                                                                          |                                                                                                                                                     |                                                 |                                                        |
| ug0932     | 193                  |                                                                          |                                                                                                                                                     |                                                 |                                                        |
| ug0933     | 568                  | GO:0000003,GO:0009791,GO:0007275,GO:0005634                              | reproduction,post-embryonic development,multicellular organismal development                                                                        | nucleus                                         |                                                        |
| ug0934_1   | 838                  | GO:0006464,GO:0019538,GO:0009056,GO:009987,GO:0003824                    | protein modification process,protein metabolic process,catabolic process,cellular                                                                   |                                                 | catalytic activity                                     |
| ug0934_2   | 878                  |                                                                          |                                                                                                                                                     |                                                 |                                                        |
| ug0935     | 1199                 | GO:0016787,GO:0016020,GO:0005215,GO:0005737,GO:0006                      | transport                                                                                                                                           | membrane                                        | hydrolase activity,transporter activity                |
| ug0936     | 594                  | GO:0009058,GO:00016301,GO:0000166,G                                      | nucleobase, nucleoside, nucleotide and nucleic acid metabolic process,biosynthetic process                                                          | cytoplasm                                       | kinase activity,nucleotide binding,binding             |
| ug0937     | 690                  |                                                                          |                                                                                                                                                     |                                                 |                                                        |
| ug0938_1   | 627                  | GO:0005515                                                               |                                                                                                                                                     |                                                 | protein binding                                        |
| ug0938_2   | 490                  |                                                                          |                                                                                                                                                     |                                                 |                                                        |
| ug0939     | 625                  | GO:0003824,GO:0008152,GO:0009058,GO:0009987,GO:0009536,G                 | metabolic process,biosynthetic process,cellular process,photosynthesis                                                                              | plastid                                         | catalytic activity                                     |
| ug0940     | 910                  | GO:0005488,GO:0003824,GO:0008152,GO:0009058,GO:0009987,G                 | metabolic process,biosynthetic process,cellular process,photosynthesis                                                                              | plastid                                         | binding,catalytic activity                             |
| ug0941     | 850                  | O:0009536,GO:001597GO:0009058,GO:000987,GO:0005488,GO:0009536,GO:0003824 | biosynthetic process,cellular process                                                                                                               | plastid                                         | binding,catalytic activity                             |
| ug0942_1   | 685                  |                                                                          |                                                                                                                                                     |                                                 |                                                        |
| ug0942_2   | 796                  | GO:0005215,GO:0006810,GO:0009058,GO:0006091,GO:0006139,G                 | transport,biosynthetic process,generation of precursor metabolites and energy,nucleobase, nucleoside, nucleotide and nucleic acid metabolic process | membrane                                        | transporter activity,hydrolase activity                |
| ug0943     | 570                  |                                                                          |                                                                                                                                                     |                                                 |                                                        |
| ug0944     | 721                  | GO:0005515,GO:0005005198,GO:0005840,GO:0006412                           | translation                                                                                                                                         | intracellular ribosome                          | protein binding structural molecule activity           |
| ug0945_1   | 715                  | GO:0004872,GO:0005515,GO:0005215,GO:0006810,GO:0009987,G                 | transport,cellular process                                                                                                                          | membrane,mitochondrion                          | receptor activity,protein binding,transporter activity |
| ug0945_2   | 516                  | O:0016020,GO:000573                                                      |                                                                                                                                                     |                                                 |                                                        |
| ug0946     | 834                  |                                                                          |                                                                                                                                                     |                                                 |                                                        |
| ug0947     | 802                  |                                                                          |                                                                                                                                                     |                                                 |                                                        |
| ug0948     | 1057                 | GO:0005886,GO:0005791                                                    |                                                                                                                                                     | plasma membrane                                 | binding                                                |
| ug0949_1   | 791                  |                                                                          |                                                                                                                                                     |                                                 |                                                        |
| ug0949_2   | 807                  | GO:0005488                                                               |                                                                                                                                                     |                                                 | binding                                                |
| ug0950     | 971                  |                                                                          |                                                                                                                                                     |                                                 |                                                        |
| ug0951     | 657                  | GO:0005654,GO:0006350,GO:0016740,GO:0003677,GO:0005515                   | transcription                                                                                                                                       | nucleoplasm                                     | transferase activity,DNA binding,protein binding       |
| ug0952     | 465                  | GO:0005737,GO:0005739,GO:0016020,GO:0                                    |                                                                                                                                                     | cytoplasm,mitochondrion,membrane, intracellular |                                                        |
| ug0953     | 711                  | GO:0019538,GO:0009987,GO:0003824                                         | protein metabolic process,cellular process                                                                                                          |                                                 | catalytic activity                                     |
| ug0954_1   | 313                  |                                                                          |                                                                                                                                                     |                                                 |                                                        |
| ug0954_2   | 680                  | GO:0005773                                                               |                                                                                                                                                     | vacuole                                         |                                                        |
| ug0955     | 709                  | GO:0005488,GO:0005897                                                    |                                                                                                                                                     | intracellular                                   | binding                                                |
| ug0956     | 897                  |                                                                          |                                                                                                                                                     |                                                 |                                                        |
| ug0957_1   | 648                  | GO:0007165,GO:0009719,GO:0005634,GO:0                                    | signal transduction,response to endogenous stimulus,transcription                                                                                   | nucleus                                         |                                                        |
| ug0957_2   | 390                  |                                                                          |                                                                                                                                                     |                                                 |                                                        |
| ug0958     | 1145                 |                                                                          |                                                                                                                                                     |                                                 |                                                        |
| ug0959     | 449                  | GO:0016020,GO:0009844,GO:0005622,GO:0006810,GO:0005215                   | transport                                                                                                                                           | membrane,plastid intracellular                  | transporter activity                                   |
| ug0960     | 844                  |                                                                          |                                                                                                                                                     |                                                 |                                                        |



| Unigene ID | sequence length (bp) | GO-ID                                                                                                                                                                 | Biological process                                                                                                      | Cellular component                       | Molecular function                                         |
|------------|----------------------|-----------------------------------------------------------------------------------------------------------------------------------------------------------------------|-------------------------------------------------------------------------------------------------------------------------|------------------------------------------|------------------------------------------------------------|
| ug0961_1   | 941                  | GO:0016020,GO:0009579,GO:0009536,GO:004872,GO:0005739                                                                                                                 |                                                                                                                         | membrane,thylakoid,plastid,mitochondrion | receptor activity                                          |
| ug0961_2   | 1022                 | GO:0005737                                                                                                                                                            |                                                                                                                         | cytoplasm                                |                                                            |
| ug0962     | 772                  | GO:0008152,GO:0005488,GO:0003824,GO:0005730,GO:0005198,GO:0005840,GO:0005829,GO:0006412,GO:0006950,GO:0008152,GO:0003824,GO:00008152,GO:0009536,GO:0005829,GO:0005730 | metabolic process                                                                                                       | plastid                                  | binding,catalytic activity                                 |
| ug0963     | 566                  |                                                                                                                                                                       |                                                                                                                         |                                          |                                                            |
| ug0964     | 377                  | GO:0005730,GO:0005198,GO:0005840,GO:0005829,GO:0006412,GO:0006950,GO:0008152,GO:0003824,GO:00008152,GO:0009536,GO:0005829,GO:0005730                                  | translation                                                                                                             | nucleolus,ribosome,cytosol,mitochondrion | structural molecule activity                               |
| ug0965     | 959                  | GO:0008152,GO:0009536,GO:0005829,GO:0005730                                                                                                                           | stress,biological_process,metabolic process,response to abiotic stimulus                                                | plastid,cytosol,mitochondrion            | catalytic activity                                         |
| ug0966     | 949                  | GO:0006810,GO:0000166,GO:0007165,GO:0019538,GO:000987,GO:0005515,GO:0005737,GO:0000166,GO:0005737,GO:0003824,GO:0006519,GO:0019748,GO:0009058,GO:0009056              | transport,signal transduction                                                                                           |                                          | nucleotide binding                                         |
| ug0967_1   | 1052                 | GO:0005515,GO:0005737,GO:0000166,GO:0005737,GO:0003824,GO:0006519,GO:0019748,GO:0009058,GO:0009056                                                                    | protein metabolic process,cellular process,response to stress                                                           | cytoplasm                                | protein binding,nucleotide binding                         |
| ug0967_2   | 723                  |                                                                                                                                                                       |                                                                                                                         |                                          |                                                            |
| ug0968_1   | 441                  | GO:0005737,GO:0003824,GO:0006519,GO:0019748,GO:0009058,GO:0009056                                                                                                     | cellular amino acid and derivative metabolic process,secondary metabolic process,biosynthetic process,catabolic process | cytoplasm                                | catalytic activity                                         |
| ug0968_2   | 1032                 |                                                                                                                                                                       |                                                                                                                         |                                          |                                                            |
| ug0969     | 612                  |                                                                                                                                                                       |                                                                                                                         |                                          |                                                            |
| ug0970     | 854                  |                                                                                                                                                                       |                                                                                                                         |                                          |                                                            |
| ug0971     | 791                  |                                                                                                                                                                       |                                                                                                                         |                                          |                                                            |
| ug0972     | 871                  |                                                                                                                                                                       |                                                                                                                         |                                          |                                                            |
| ug0973     | 770                  | GO:0003676,GO:00050008152,GO:0005739,GO:0003824                                                                                                                       | metabolic process                                                                                                       | intracellular<br>mitochondrion           | nucleic acid binding<br>catalytic activity                 |
| ug0974     | 1017                 |                                                                                                                                                                       |                                                                                                                         |                                          |                                                            |
| ug0975     | 453                  | GO:0009058,GO:000987,GO:0019748,GO:0019538,GO:000987,GO:0005737,GO:0003824,GO:0005634,GO:0008289,GO:0030234,GO:0007165,GO:0005840,GO:0005198,GO:0006412               | biosynthetic process,cellular process,secondary metabolic process,cell cycle                                            | cytoplasm,nucleus                        | catalytic activity                                         |
| ug0976     | 784                  |                                                                                                                                                                       |                                                                                                                         |                                          |                                                            |
| ug0977     | 911                  | GO:0008289,GO:0030234,GO:0007165,GO:0005840,GO:0005198,GO:0006412                                                                                                     | signal transduction                                                                                                     | membrane                                 | lipid binding,enzyme regulator activity                    |
| ug0978     | 654                  | GO:0005840,GO:0005198,GO:0006412                                                                                                                                      | translation                                                                                                             | ribosome                                 | structural molecule activity                               |
| ug0979     | 322                  |                                                                                                                                                                       |                                                                                                                         |                                          |                                                            |
| ug0980     | 994                  | GO:0006139,GO:0009058,GO:0016740                                                                                                                                      | nucleobase, nucleoside, nucleotide and nucleic acid metabolic process,biosynthetic process                              |                                          | transferase activity                                       |
| ug0981     | 572                  |                                                                                                                                                                       |                                                                                                                         |                                          |                                                            |
| ug0982     | 786                  |                                                                                                                                                                       |                                                                                                                         |                                          |                                                            |
| ug0983     | 890                  | GO:0019725,GO:000674,GO:0003824,GO:0008152,GO:0009536                                                                                                                 | cellular homeostasis,metabolic process                                                                                  | plastid                                  | molecular_function,catalytic activity                      |
| ug0984     | 1013                 |                                                                                                                                                                       |                                                                                                                         |                                          |                                                            |
| ug0985     | 715                  | GO:0005737,GO:000791,GO:0016020,GO:0005635,GO:0005515,GO:0016043,GO:000704,GO:0005886,GO:000674,GO:0003824,GO:0005215,GO:0016020,GO:0005840,GO:0005198,GO:0006412     | post-embryonic development,cellular component organization,cell cycle                                                   | cytoplasm,membrane,nuclear envelope      | protein binding                                            |
| ug0986     | 776                  |                                                                                                                                                                       |                                                                                                                         |                                          |                                                            |
| ug0987     | 481                  | GO:0016020,GO:0005840,GO:0005198,GO:0006412                                                                                                                           |                                                                                                                         | plasma membrane,membrane,mitochondrion   | molecular_function,catalytic activity,transporter activity |
| ug0988     | 807                  | GO:0000166,GO:0003824,GO:0005737,GO:0005730                                                                                                                           |                                                                                                                         | membrane,mitochondrion                   | nucleotide binding,RNA                                     |
| ug0989_1   | 1007                 |                                                                                                                                                                       |                                                                                                                         |                                          |                                                            |
| ug0989_2   | 771                  | GO:0019725,GO:000674,GO:0003824,GO:0009719,GO:000165,GO:0005576,GO:0005618,GO:0004872,GO:0003674,GO:000548,GO:0003723,GO:0016740,GO:0006139                           | cellular homeostasis,metabolic process                                                                                  |                                          | molecular_function,catalytic activity                      |
| ug0990     | 866                  |                                                                                                                                                                       |                                                                                                                         |                                          |                                                            |
| ug0991     | 598                  | GO:0003723,GO:0016740,GO:0006139                                                                                                                                      | response to endogenous stimulus,signal transduction                                                                     | extracellular region,cell wall           | receptor activity,molecular_function,binding               |
| ug0992     | 1082                 | GO:0006810,GO:0000166,GO:0007165                                                                                                                                      | nucleobase, nucleoside, nucleotide and nucleic acid metabolic process                                                   |                                          | RNA binding,transferase activity                           |
| ug0993     | 1098                 | GO:0016787                                                                                                                                                            | transport,signal transduction                                                                                           |                                          | nucleotide binding                                         |
| ug0994     | 670                  | GO:0005488,GO:000674,GO:0005739,GO:0005730,GO:0005730,GO:0005730                                                                                                      |                                                                                                                         | mitochondrion,plastid                    | binding,molecular_function                                 |
| ug0995     | 510                  | GO:0005840,GO:0005829,GO:0006412,GO:0005730                                                                                                                           | translation                                                                                                             | nucleolus,ribosome,cytosol,mitochondrion | structural molecule activity                               |
| ug0996     | 809                  |                                                                                                                                                                       |                                                                                                                         |                                          |                                                            |



| Unigene ID | sequence length (bp) | GO-ID                                                                                          | Biological process                                                                           | Cellular component                                                   | Molecular function                                                                                    |
|------------|----------------------|------------------------------------------------------------------------------------------------|----------------------------------------------------------------------------------------------|----------------------------------------------------------------------|-------------------------------------------------------------------------------------------------------|
| ug1029     | 787                  | GO:0005488,GO:0005886,GO:0003824                                                               |                                                                                              | plasma membrane                                                      | binding,catalytic activity                                                                            |
| ug1030     | 571                  | GO:0016787,GO:0000166                                                                          |                                                                                              |                                                                      | hydrolase activity,nucleotide binding                                                                 |
| ug1031     | 588                  | GO:0016020                                                                                     |                                                                                              | membrane                                                             |                                                                                                       |
| ug1032_1   | 1119                 | GO:0006464,GO:0005737,GO:0000166,GO:0007165,GO:0016301,GO:0016787,GO:0005                      | protein modification process,signal transduction                                             | cytoplasm,mitochondrion                                              | nucleotide binding,kinase activity                                                                    |
| ug1032_2   | 897                  | GO:0008152,GO:0009987,GO:0005488                                                               | metabolic process,cellular process                                                           | cytoplasm                                                            | hydrolase activity,binding                                                                            |
| ug1033     | 675                  | GO:0005840,GO:0005198,GO:0006412                                                               | translation                                                                                  | ribosome                                                             | structural molecule activity                                                                          |
| ug1034     | 506                  | GO:0008152,GO:0003824,GO:0005488                                                               | metabolic process                                                                            |                                                                      | catalytic activity,binding                                                                            |
| ug1035     | 941                  | GO:0005488                                                                                     |                                                                                              |                                                                      | binding                                                                                               |
| ug1036     | 460                  | GO:0016020,GO:0005777,GO:0016043,GO:0                                                          | cellular component organization,cellular process                                             | membrane,peroxisome                                                  |                                                                                                       |
| ug1037     | 470                  | GO:0016020                                                                                     |                                                                                              | membrane                                                             |                                                                                                       |
| ug1038     | 787                  |                                                                                                |                                                                                              |                                                                      |                                                                                                       |
| ug1039     | 507                  |                                                                                                |                                                                                              |                                                                      |                                                                                                       |
| ug1040     | 799                  | GO:0016043,GO:0009987,GO:0005777,GO:0005739,GO:0005488,G                                       | cellular component organization,cellular process                                             | peroxisome,mitochondrion,plastid                                     | binding                                                                                               |
| ug1041     | 774                  |                                                                                                |                                                                                              |                                                                      |                                                                                                       |
| ug1042     | 865                  | GO:0005622,GO:0005886,GO:0019538,GO:0009056,GO:0009987,GO:0005634,GO:0005829,GO:0005576,GO:001 | protein metabolic process,catabolic process,cellular process                                 | intracellular,plasma membrane,nucleus,cytoplasm,extracellular region | hydrolase activity                                                                                    |
| ug1043_1   | 581                  | GO:0003824,GO:0006                                                                             | translation                                                                                  |                                                                      | catalytic activity                                                                                    |
| ug1043_2   | 785                  | GO:0019538,GO:0009056,GO:0016787                                                               | protein metabolic process,catabolic process                                                  |                                                                      | hydrolase activity                                                                                    |
| ug1044     | 732                  | GO:0005840,GO:0005198,GO:0006412                                                               | translation                                                                                  | ribosome                                                             | structural molecule activity                                                                          |
| ug1045     | 778                  | GO:0005623                                                                                     |                                                                                              | cell                                                                 |                                                                                                       |
| ug1046     | 962                  | GO:0019725,GO:0003824,GO:0005488,GO:0006810,GO:0009536                                         | cellular homeostasis,transport                                                               | plastid                                                              | catalytic activity,binding                                                                            |
| ug1047     | 513                  | GO:0019725,GO:0005488,GO:0008152,GO:0003824,GO:0009536,G                                       | cellular homeostasis,metabolic process,transport                                             | plastid                                                              | binding,catalytic activity                                                                            |
| ug1048     | 479                  |                                                                                                |                                                                                              |                                                                      |                                                                                                       |
| ug1049_1   | 719                  | GO:0005886                                                                                     |                                                                                              | plasma membrane                                                      |                                                                                                       |
| ug1049_2   | 593                  | GO:0005856,GO:0005737,GO:0000166,GO:00016020,GO:0005622,GO:0005215,GO:0                        | transport,biosynthetic process,generation of precursor                                       | cytoskeleton,cytoplasm                                               | nucleotide binding,protein binding                                                                    |
| ug1050     | 572                  | GO:0006810,GO:0009058,GO:0006091,GO:0006139,GO:001                                             | metabolites and energy,nucleobase, nucleoside, nucleotide and nucleic acid metabolic process | membrane,intracellular,mitochondrion                                 | transporter activity,hydrolase activity                                                               |
| ug1051_1   | 492                  | GO:0005975,GO:0009987,GO:0016787,GO:0005576,GO:0005618,G                                       | carbohydrate metabolic process,cellular process                                              | extracellular region,cell wall                                       | hydrolase activity,transferase activity                                                               |
| ug1051_2   | 436                  | GO:0005975,GO:0009987,GO:0016787,GO:0005576,GO:0005618,G                                       | carbohydrate metabolic process,cellular process                                              | extracellular region,cell wall                                       | hydrolase activity,transferase activity                                                               |
| ug1052     | 835                  |                                                                                                |                                                                                              |                                                                      |                                                                                                       |
| ug1053     | 583                  | GO:0005975,GO:0009987,GO:0016787,GO:0005576,GO:0005618,G                                       | carbohydrate metabolic process,cellular process                                              | extracellular region,cell wall                                       | hydrolase activity,transferase activity                                                               |
| ug1054     | 868                  | GO:0006412,GO:0008135                                                                          | translation                                                                                  |                                                                      | translation factor activity, nucleic acid binding                                                     |
| ug1055     | 750                  | GO:0005488,GO:0005                                                                             |                                                                                              | intracellular                                                        | binding                                                                                               |
| ug1056     | 480                  |                                                                                                |                                                                                              |                                                                      |                                                                                                       |
| ug1057     | 893                  | GO:0030246,GO:0007267,GO:0003677,GO:0006810,GO:0005886                                         | cell-cell signaling,transport                                                                | plasma membrane                                                      | carbohydrate binding,DNA binding                                                                      |
| ug1058     | 527                  | GO:0005773,GO:0005515,GO:0009536,GO:00009058,GO:0009                                           |                                                                                              | vacuole,plastid,plasma membrane                                      | protein binding                                                                                       |
| ug1059     | 814                  | GO:0009058,GO:0009987,GO:0006629,GO:0005215,GO:0005488,G                                       | biosynthetic process,cellular process,lipid metabolic process                                | plastid                                                              | transporter activity,binding                                                                          |
| ug1060     | 592                  |                                                                                                |                                                                                              |                                                                      |                                                                                                       |
| ug1061     | 899                  | GO:0005737,GO:0008135,GO:0000166,GO:0008152,GO:0006412,GO:0016787,GO:0030528                   | metabolic process,translation                                                                | cytoplasm                                                            | translation factor activity, nucleic acid binding,nucleotide binding,hydrolase activity,transcription |
| ug1062     | 671                  |                                                                                                |                                                                                              |                                                                      |                                                                                                       |

| Unigene ID | sequence length (bp) | GO-ID                                                                                                                                                                | Biological process                                                                                                                                                                 | Cellular component                                     | Molecular function                                    |
|------------|----------------------|----------------------------------------------------------------------------------------------------------------------------------------------------------------------|------------------------------------------------------------------------------------------------------------------------------------------------------------------------------------|--------------------------------------------------------|-------------------------------------------------------|
| ug1063     | 337                  | GO:0016020,GO:0009536,GO:0006091,GO:0                                                                                                                                | generation of precursor metabolites and energy,photosynthesis                                                                                                                      | membrane,plastid                                       |                                                       |
| ug1064_1   | 641                  |                                                                                                                                                                      |                                                                                                                                                                                    |                                                        |                                                       |
| ug1064_2   | 814                  | GO:0003824,GO:0008380                                                                                                                                                | metabolic process                                                                                                                                                                  |                                                        | catalytic activity                                    |
| ug1065     | 380                  |                                                                                                                                                                      |                                                                                                                                                                                    |                                                        |                                                       |
| ug1066     | 1221                 | GO:0005783,GO:0006810,GO:0009987,GO:0                                                                                                                                | transport,cellular process                                                                                                                                                         | endoplasmic reticulum,plasma membrane                  |                                                       |
| ug1067     | 926                  | GO:0005198                                                                                                                                                           |                                                                                                                                                                                    |                                                        | structural molecule activity                          |
| ug1068     | 425                  | GO:0005773                                                                                                                                                           |                                                                                                                                                                                    | vacuole                                                |                                                       |
|            |                      | GO:0000003,GO:0009791,GO:0009790,GO:0008152,GO:0009987,GO:0007275,GO:000372                                                                                          | reproduction,post-embryonic development,embryonic development,metabolic process,cellular                                                                                           |                                                        |                                                       |
| ug1069     | 553                  | 3,GO:0006950,GO:0009607,GO:0030154,GO:0009653,GO:0004518,GO:0009719,GO:0005515,GO:0009628,GO:0006810,GO:000987,GO:0000166,GO:0005515,GO:0007165,GO:0005634,GO:001678 | process,multicellular organismal development,response to stress,response to biotic stimulus,cell differentiation,anatomical structure                                              | cytoplasm,nucleus                                      | RNA binding,nuclease activity,protein binding         |
| ug1070     | 1002                 |                                                                                                                                                                      | transport,cellular process,signal transduction                                                                                                                                     | nucleus                                                | nucleotide binding,protein binding,hydrolase activity |
| ug1071     | 370                  |                                                                                                                                                                      |                                                                                                                                                                                    |                                                        |                                                       |
| ug1072     | 665                  | GO:0016740,GO:000958,GO:0005975,GO:0                                                                                                                                 | biosynthetic process,carbohydrate metabolic process,cellular process                                                                                                               |                                                        | transferase activity                                  |
| ug1073     | 187                  |                                                                                                                                                                      |                                                                                                                                                                                    |                                                        |                                                       |
| ug1074     | 453                  | GO:0005488,GO:0003908                                                                                                                                                |                                                                                                                                                                                    |                                                        | binding,catalytic activity hydrolase activity         |
| ug1075     | 908                  | GO:0016787                                                                                                                                                           |                                                                                                                                                                                    |                                                        |                                                       |
| ug1076     | 287                  |                                                                                                                                                                      |                                                                                                                                                                                    |                                                        |                                                       |
| ug1077     | 721                  | GO:0019725,GO:0006091,GO:0005737,GO:0003674,GO:0003824,GO:0005198,GO:0005                                                                                            | cellular homeostasis,generation of precursor metabolites and energy,transport                                                                                                      | cytoplasm                                              | molecular_function,catalytic activity                 |
| ug1078     | 454                  | 840,GO:0009536,GO:0006412,GO:0003723                                                                                                                                 | translation                                                                                                                                                                        | ribosome,plastid                                       | structural molecule activity,RNA binding              |
| ug1079     | 494                  | 215,GO:0016020,GO:0006810,GO:0009987                                                                                                                                 | transport,cellular process                                                                                                                                                         | membrane                                               | protein binding,transporter activity                  |
| ug1080     | 900                  | GO:0005840,GO:0005198,GO:0006412                                                                                                                                     | translation                                                                                                                                                                        | ribosome                                               | structural molecule activity                          |
| ug1081     | 210                  |                                                                                                                                                                      |                                                                                                                                                                                    |                                                        |                                                       |
| ug1082     | 1194                 | GO:0005488                                                                                                                                                           |                                                                                                                                                                                    |                                                        | binding                                               |
| ug1083     | 837                  | GO:0005515                                                                                                                                                           |                                                                                                                                                                                    |                                                        | protein binding                                       |
|            |                      | GO:0005515,GO:0005215,GO:0009536,GO:0005773,GO:0016020,GO:0005739,GO:000588                                                                                          | transport                                                                                                                                                                          | plastid,vacuole,membrane,mitochondrion,plasma membrane | protein binding,transporter activity                  |
| ug1084_1   | 1082                 |                                                                                                                                                                      |                                                                                                                                                                                    |                                                        |                                                       |
| ug1084_2   | 456                  | 987,GO:0009056,GO:00030246,GO:0005975                                                                                                                                | cellular process,catabolic process,carbohydrate metabolic process                                                                                                                  |                                                        | hydrolase activity,carbohydrate binding               |
| ug1085     | 522                  | GO:0005488,GO:000958,GO:0006629,GO:0003824,GO:0009987,GO:0005737,GO:0006810,GO:0009987,GO:0005739,GO:000588                                                          | biosynthetic process,lipid metabolic process,cellular process                                                                                                                      | membrane                                               | binding,catalytic activity                            |
| ug1086_1   | 274                  |                                                                                                                                                                      |                                                                                                                                                                                    |                                                        |                                                       |
| ug1086_2   | 688                  |                                                                                                                                                                      |                                                                                                                                                                                    |                                                        |                                                       |
| ug1087     | 664                  |                                                                                                                                                                      |                                                                                                                                                                                    |                                                        |                                                       |
| ug1088     | 593                  | GO:0016740,GO:000958,GO:0007165,GO:0006950,GO:0009628,GO:0009605,GO:0009719,GO:0000003,GO:0009791,GO:0005488,GO:0008150                                              | biosynthetic process signal transduction,response to stress,response to abiotic stimulus,response to external stimulus,response to endogenous stimulus,reproduction,post-embryonic |                                                        | transferase activity                                  |
| ug1089     | 911                  |                                                                                                                                                                      |                                                                                                                                                                                    |                                                        | binding                                               |
| ug1090     | 930                  |                                                                                                                                                                      |                                                                                                                                                                                    |                                                        |                                                       |
| ug1091     | 545                  |                                                                                                                                                                      |                                                                                                                                                                                    |                                                        |                                                       |
| ug1092     | 901                  | GO:0005840,GO:0005198,GO:0006412                                                                                                                                     | translation                                                                                                                                                                        | ribosome                                               | structural molecule activity                          |
| ug1093     | 408                  |                                                                                                                                                                      |                                                                                                                                                                                    |                                                        |                                                       |
| ug1094     | 547                  |                                                                                                                                                                      |                                                                                                                                                                                    |                                                        |                                                       |
| ug1095_1   | 498                  |                                                                                                                                                                      |                                                                                                                                                                                    |                                                        |                                                       |
| ug1095_2   | 1195                 |                                                                                                                                                                      |                                                                                                                                                                                    |                                                        |                                                       |
| ug1096     | 1124                 | GO:0005737,GO:0006810,GO:0009058,GO:0                                                                                                                                | biosynthetic process,cellular amino acid and derivative metabolic                                                                                                                  | cytoplasm                                              | transferase activity                                  |
| ug1097     | 1081                 |                                                                                                                                                                      |                                                                                                                                                                                    |                                                        |                                                       |
| ug1098     | 874                  | GO:0006412,GO:0008135                                                                                                                                                | translation                                                                                                                                                                        |                                                        | translation factor activity, nucleic acid binding     |
| ug1099     | 625                  | GO:0005773,GO:0005515,GO:0005886                                                                                                                                     |                                                                                                                                                                                    | vacuole,plasma membrane                                | protein binding                                       |
| ug1100_1   | 306                  | GO:0000166,GO:0003676                                                                                                                                                |                                                                                                                                                                                    |                                                        | nucleotide binding,nucleic acid binding               |

| Unigene ID | sequence length (bp) | GO-ID                                                                                          | Biological process                                                                                                                                  | Cellular component                      | Molecular function                                         |
|------------|----------------------|------------------------------------------------------------------------------------------------|-----------------------------------------------------------------------------------------------------------------------------------------------------|-----------------------------------------|------------------------------------------------------------|
| ug1100_2   | 1379                 | GO:0006810,GO:0005215,GO:0016020,GO:0                                                          | transport                                                                                                                                           | membrane,mitochondrion                  | transporter activity                                       |
| ug1101     | 806                  |                                                                                                |                                                                                                                                                     |                                         |                                                            |
| ug1102     | 838                  |                                                                                                |                                                                                                                                                     |                                         |                                                            |
| ug1103     | 651                  | GO:0016020,GO:0005622,GO:0005215,GO:0005739,GO:0006810,GO:0009058,GO:0006091,GO:0006139,GO:000 | transport,biosynthetic process,generation of precursor metabolites and energy,nucleobase, nucleoside, nucleotide and nucleic acid metabolic process | membrane,intracellular,mitochondrion    | transporter activity,nucleotide binding,hydrolase activity |
| ug1104     | 568                  |                                                                                                |                                                                                                                                                     |                                         |                                                            |
| ug1105     | 776                  | GO:0009536,GO:0016                                                                             |                                                                                                                                                     | plastid,membrane                        |                                                            |
| ug1106     | 772                  |                                                                                                |                                                                                                                                                     |                                         |                                                            |
| ug1107     | 806                  |                                                                                                |                                                                                                                                                     |                                         |                                                            |
| ug1108     | 591                  |                                                                                                |                                                                                                                                                     |                                         |                                                            |
| ug1109     | 420                  |                                                                                                |                                                                                                                                                     |                                         |                                                            |
| ug1110     | 868                  | GO:0005623,GO:0005                                                                             |                                                                                                                                                     | cell,cytoplasm                          |                                                            |
| ug1111     | 286                  |                                                                                                |                                                                                                                                                     |                                         |                                                            |
| ug1112     | 1288                 | GO:0019725,GO:0005783,GO:0003824,GO:0009536,GO:0006950,GO:0008150,GO:0                         | cellular homeostasis response to stress,biological_process,generatio                                                                                | endoplasmic reticulum                   | catalytic activity                                         |
| ug1113     | 957                  | 006091,GO:0005975,GO:0009056,GO:0003824,GO:0005739                                             | n of precursor metabolites and energy,carbohydrate metabolic process,catabolic process                                                              | plastid,mitochondrion                   | catalytic activity                                         |
| ug1114     | 364                  |                                                                                                |                                                                                                                                                     |                                         |                                                            |
| ug1115_1   | 570                  | GO:0005576,GO:0006950,GO:0005515,GO:0005618,GO:0016020                                         | response to stress                                                                                                                                  | extracellular region,cell wall,membrane | protein binding                                            |
| ug1115_2   | 868                  |                                                                                                |                                                                                                                                                     |                                         |                                                            |
| ug1116     | 863                  | GO:0005488                                                                                     |                                                                                                                                                     |                                         | binding                                                    |
| ug1117     | 975                  | GO:0005840,GO:0005198,GO:0009987,GO:0009536,GO:0006412,GO:0005623,GO:0003                      | cellular process,translation                                                                                                                        | ribosome,plastid                        | structural molecule activity,RNA binding                   |
| ug1118     | 578                  | 824,GO:0008152,GO:0005618,GO:0000166                                                           | metabolic process                                                                                                                                   | cell,cell wall                          | catalytic activity,nucleotide binding                      |
| ug1119     | 604                  |                                                                                                |                                                                                                                                                     |                                         |                                                            |
| ug1120     | 820                  | GO:0006350                                                                                     | transcription                                                                                                                                       |                                         |                                                            |
| ug1121     | 525                  | GO:0005622                                                                                     |                                                                                                                                                     | intracellular                           |                                                            |
| ug1122     | 581                  |                                                                                                |                                                                                                                                                     |                                         |                                                            |
| ug1123     | 911                  | GO:0016020,GO:0009536,GO:0006091,GO:0                                                          | generation of precursor metabolites and energy,photosynthesis                                                                                       | membrane,plastid                        |                                                            |
| ug1124     | 644                  | GO:0016301,GO:0005975,GO:0009987                                                               | carbohydrate metabolic process,cellular process                                                                                                     |                                         | kinase activity                                            |
| ug1125     | 440                  |                                                                                                |                                                                                                                                                     |                                         |                                                            |
| ug1126     | 685                  |                                                                                                |                                                                                                                                                     |                                         |                                                            |
| ug1127     | 650                  | GO:0005488,GO:0008152,GO:0003824                                                               | metabolic process                                                                                                                                   |                                         | binding,catalytic activity                                 |
| ug1128_1   | 456                  |                                                                                                |                                                                                                                                                     |                                         |                                                            |
| ug1128_2   | 825                  | GO:0016043,GO:0009987,GO:0005737,GO:0005515,GO:0005856                                         | cellular component organization,cellular process                                                                                                    | cytoplasm,cytoskeleton                  | protein binding                                            |
| ug1129     | 688                  | GO:0019538,GO:0009536,GO:0016787,GO:0000166,GO:0005                                            | protein metabolic process,catabolic process                                                                                                         |                                         | hydrolase activity                                         |
| ug1130_1   | 990                  | 794,GO:0006810,GO:0009987,GO:0005783                                                           | transport,cellular process                                                                                                                          | Golgi apparatus,endoplasmic reticulum   | nucleotide binding                                         |
| ug1130_2   | 542                  |                                                                                                |                                                                                                                                                     |                                         |                                                            |
| ug1131     | 991                  |                                                                                                |                                                                                                                                                     |                                         |                                                            |
| ug1132     | 892                  | GO:0005975,GO:0016020,GO:0005515,GO:0006                                                       | carbohydrate metabolic process                                                                                                                      |                                         | hydrolase activity                                         |
| ug1133     | 540                  | 810,GO:0009987,GO:0005768,GO:0016020,GO:0006810,GO:0005                                        | transport,cellular process                                                                                                                          | endosome,membrane                       | protein binding                                            |
| ug1134     | 734                  | 215,GO:0016020,GO:0005773,GO:0016787                                                           | transport                                                                                                                                           | membrane,vacuole                        | transporter activity,hydrolase activity                    |
| ug1135     | 406                  |                                                                                                |                                                                                                                                                     |                                         |                                                            |
| ug1136_1   | 516                  |                                                                                                |                                                                                                                                                     |                                         |                                                            |
| ug1136_2   | 776                  |                                                                                                |                                                                                                                                                     |                                         |                                                            |
| ug1137_1   | 473                  |                                                                                                |                                                                                                                                                     |                                         |                                                            |
| ug1137_2   | 781                  | GO:0003676,GO:0000166,GO:0016787                                                               |                                                                                                                                                     |                                         | nucleic acid binding,nucleotide                            |
| ug1138     | 477                  | GO:0005215,GO:0016020,GO:0006810,GO:0                                                          | transport,cellular process                                                                                                                          | membrane                                | transporter activity                                       |
| ug1139     | 724                  | GO:0005840,GO:0005198,GO:0006412                                                               | translation                                                                                                                                         | ribosome                                | structural molecule activity                               |
| ug1140     | 979                  |                                                                                                |                                                                                                                                                     |                                         |                                                            |
| ug1141     | 733                  |                                                                                                |                                                                                                                                                     |                                         |                                                            |
| ug1142_1   | 162                  |                                                                                                |                                                                                                                                                     |                                         |                                                            |

| Unigene ID | sequence length (bp) | GO-ID                                                                                                                              | Biological process                                                                                                                                  | Cellular component                            | Molecular function                                                    |
|------------|----------------------|------------------------------------------------------------------------------------------------------------------------------------|-----------------------------------------------------------------------------------------------------------------------------------------------------|-----------------------------------------------|-----------------------------------------------------------------------|
| ug1142_2   | 1022                 | GO:0005840,GO:0005198,GO:0006412                                                                                                   | translation                                                                                                                                         | ribosome                                      | structural molecule activity                                          |
| ug1143     | 747                  | GO:0005622,GO:0003677,GO:0016043,GO:009987,GO:0005634                                                                              | cellular component organization,cellular process                                                                                                    | intracellular,nucleus                         | DNA binding                                                           |
| ug1144     | 960                  | GO:0005840                                                                                                                         |                                                                                                                                                     | ribosome                                      |                                                                       |
| ug1145     | 585                  | GO:0019538,GO:0009056,GO:0016787                                                                                                   | protein metabolic process,catabolic process                                                                                                         |                                               | hydrolase activity                                                    |
| ug1146_1   | 547                  | GO:0003824,GO:0005215,GO:0006091,GO:0005576                                                                                        | generation of precursor metabolites and energy                                                                                                      | mitochondrion                                 | catalytic activity,transporter activity                               |
| ug1146_2   | 867                  | GO:0005576                                                                                                                         |                                                                                                                                                     | extracellular region                          |                                                                       |
| ug1147     | 932                  | GO:0016020,GO:0005739,GO:0006091,GO:000678                                                                                         | generation of precursor metabolites and energy                                                                                                      | membrane,mitochondrion                        | catalytic activity                                                    |
| ug1148     | 678                  |                                                                                                                                    |                                                                                                                                                     |                                               |                                                                       |
| ug1149_1   | 713                  | GO:0003676,GO:0005436                                                                                                              |                                                                                                                                                     | intracellular                                 | nucleic acid binding                                                  |
| ug1149_2   | 436                  |                                                                                                                                    |                                                                                                                                                     |                                               |                                                                       |
| ug1150     | 400                  |                                                                                                                                    |                                                                                                                                                     |                                               |                                                                       |
| ug1151     | 881                  | GO:0005783                                                                                                                         |                                                                                                                                                     | endoplasmic reticulum                         |                                                                       |
| ug1152     | 489                  |                                                                                                                                    |                                                                                                                                                     |                                               |                                                                       |
| ug1153     | 735                  | GO:0005215,GO:0016020,GO:0006810,GO:009058,GO:0006091,GO:0006139,GO:0005773                                                        | transport,biosynthetic process,generation of precursor metabolites and energy,nucleobase, nucleoside, nucleotide and nucleic acid metabolic process | membrane,vacuole                              | transporter activity                                                  |
| ug1154_1   | 666                  | GO:0005840,GO:0005198,GO:0006412                                                                                                   | translation                                                                                                                                         | ribosome                                      | structural molecule activity                                          |
| ug1154_2   | 880                  | GO:0007049,GO:0006259,GO:0009058,GO:0003677,GO:0005151,GO:0030234,GO:001630                                                        | cell cycle,DNA metabolic process,biosynthetic process                                                                                               |                                               | DNA binding,protein binding,enzyme regulator activity,kinase activity |
| ug1155     | 1060                 |                                                                                                                                    |                                                                                                                                                     |                                               |                                                                       |
| ug1156     | 413                  |                                                                                                                                    |                                                                                                                                                     |                                               |                                                                       |
| ug1157_1   | 942                  |                                                                                                                                    |                                                                                                                                                     |                                               |                                                                       |
| ug1157_2   | 869                  |                                                                                                                                    |                                                                                                                                                     |                                               |                                                                       |
| ug1158_1   | 791                  |                                                                                                                                    |                                                                                                                                                     |                                               |                                                                       |
| ug1158_2   | 635                  | GO:0016020,GO:0005570                                                                                                              |                                                                                                                                                     | membrane,intracellular                        |                                                                       |
| ug1159     | 570                  |                                                                                                                                    |                                                                                                                                                     |                                               |                                                                       |
| ug1160     | 527                  |                                                                                                                                    |                                                                                                                                                     |                                               |                                                                       |
| ug1161_1   | 641                  | GO:0016787,GO:0006519                                                                                                              | cellular amino acid and derivative metabolic process                                                                                                |                                               | hydrolase activity                                                    |
| ug1161_2   | 825                  | GO:0005737                                                                                                                         |                                                                                                                                                     | cytoplasm                                     |                                                                       |
| ug1162_1   | 860                  | GO:0019538,GO:0009987,GO:0016020,GO:001164                                                                                         | protein metabolic process,cellular process                                                                                                          | membrane                                      | protein binding                                                       |
| ug1162_2   | 1164                 |                                                                                                                                    |                                                                                                                                                     |                                               |                                                                       |
| ug1163_1   | 909                  |                                                                                                                                    |                                                                                                                                                     |                                               |                                                                       |
| ug1163_2   | 823                  | GO:0000003,GO:0009791,GO:0009790                                                                                                   | reproduction,post-embryonic development,embryonic                                                                                                   |                                               |                                                                       |
| ug1164     | 591                  | GO:0016787,GO:0005737,GO:0006629                                                                                                   | lipid metabolic process                                                                                                                             | cytoplasm                                     | hydrolase activity                                                    |
| ug1165_1   | 480                  | GO:0005198,GO:0009987,GO:0005840,GO:0005829,GO:0006412                                                                             | cellular process,translation                                                                                                                        | ribosome,cytosol                              | structural molecule activity                                          |
| ug1165_2   | 554                  | GO:0009536                                                                                                                         |                                                                                                                                                     | plastid                                       |                                                                       |
| ug1166     | 908                  | GO:0005622,GO:0005886,GO:0019538,GO:0009056,GO:0009987,GO:0005634,GO:000582                                                        | protein metabolic process,catabolic process,cellular process                                                                                        | intracellular,plasma membrane,nucleus,cytosol | hydrolase activity                                                    |
| ug1167     | 725                  |                                                                                                                                    |                                                                                                                                                     |                                               |                                                                       |
| ug1168     | 916                  |                                                                                                                                    |                                                                                                                                                     |                                               |                                                                       |
| ug1169     | 903                  | GO:0003824                                                                                                                         |                                                                                                                                                     |                                               | catalytic activity                                                    |
| ug1170     | 998                  |                                                                                                                                    |                                                                                                                                                     |                                               |                                                                       |
| ug1171     | 651                  |                                                                                                                                    |                                                                                                                                                     |                                               |                                                                       |
| ug1172     | 1000                 | GO:0016301,GO:0005634,GO:0005515,GO:0005622,GO:0005515,GO:0019538,GO:0009056,GO:0009987,GO:0003824,GO:0006464,GO:0006950,GO:000479 | protein metabolic process,catabolic process,cellular process,protein modification process,response to stress,DNA metabolic process                  | nucleus,plastid                               | kinase activity,protein binding                                       |
| ug1173     | 911                  | GO:0009056,GO:0009987,GO:0003824,GO:0006464,GO:0006950,GO:000479                                                                   |                                                                                                                                                     | intracellular                                 | protein binding,catalytic activity                                    |
| ug1174     | 479                  |                                                                                                                                    |                                                                                                                                                     |                                               |                                                                       |
| ug1175     | 414                  |                                                                                                                                    |                                                                                                                                                     |                                               |                                                                       |
| ug1176     | 1050                 | GO:0016740,GO:0005488,GO:0009058,GO:0006519,GO:0019748                                                                             | biosynthetic process,cellular amino acid and derivative metabolic process,secondary metabolic                                                       |                                               | transferase activity,binding                                          |
| ug1177_1   | 1242                 | GO:0005488,GO:0008152,GO:0003824,GO:000628                                                                                         | metabolic process                                                                                                                                   |                                               | binding,catalytic activity,nucleotide binding                         |
| ug1177_2   | 628                  | GO:0009056                                                                                                                         | catabolic process                                                                                                                                   |                                               |                                                                       |
| ug1178     | 796                  |                                                                                                                                    |                                                                                                                                                     |                                               |                                                                       |
| ug1179_1   | 570                  |                                                                                                                                    |                                                                                                                                                     |                                               |                                                                       |
| ug1179_2   | 1085                 | GO:0008150,GO:0005488                                                                                                              | biological_process                                                                                                                                  | plasma membrane                               |                                                                       |

| Unigene ID | sequence length (bp) | GO-ID                                                                                          | Biological process                                                                                                                                  | Cellular component                       | Molecular function                                            |
|------------|----------------------|------------------------------------------------------------------------------------------------|-----------------------------------------------------------------------------------------------------------------------------------------------------|------------------------------------------|---------------------------------------------------------------|
| ug1180_1   | 999                  | GO:0019725                                                                                     | cellular homeostasis                                                                                                                                |                                          |                                                               |
| ug1180_2   | 855                  | GO:0030528,GO:0005198,GO:0005840,GO:0006412                                                    | translation                                                                                                                                         | ribosome                                 | transcription regulator activity,structural molecule activity |
| ug1181     | 1136                 | GO:0005634,GO:0003676,GO:0005886                                                               |                                                                                                                                                     | nucleus,plasma membrane                  | nucleic acid binding                                          |
| ug1182     | 913                  |                                                                                                |                                                                                                                                                     |                                          |                                                               |
| ug1183     | 512                  |                                                                                                |                                                                                                                                                     |                                          |                                                               |
| ug1184     | 635                  | GO:0005618,GO:0005576,GO:0019538,GO:0009056,GO:0016787                                         | protein metabolic process,catabolic process                                                                                                         | cell wall,extracellular region           | hydrolase activity                                            |
| ug1185     | 1035                 |                                                                                                |                                                                                                                                                     |                                          |                                                               |
| ug1186     | 891                  | GO:0006810,GO:0005215,GO:0016020,GO:0005773,GO:0016787                                         | transport                                                                                                                                           | membrane,vacuole                         | transporter activity,hydrolase activity                       |
| ug1187     | 1047                 | GO:0005840,GO:0005739,GO:0005198,GO:0016740,GO:0009536,GO:0006412,GO:000372                    | translation                                                                                                                                         | ribosome,mitochondrion,plastid           | structural molecule activity,transferase activity,RNA binding |
| ug1188     | 767                  |                                                                                                |                                                                                                                                                     |                                          |                                                               |
| ug1189     | 926                  | GO:0000166,GO:0005794,GO:0006810,GO:0009987,GO:0006464,GO:0009536,GO:000716                    | transport,cellular process,protein modification process,signal transduction                                                                         | Golgi apparatus,plastid                  | nucleotide binding,transporter activity                       |
| ug1190_1   | 763                  | GO:0016043,GO:000987,GO:0005737,GO:0005515,GO:0005856                                          | cellular component organization,cellular process                                                                                                    | cytoplasm,cytoskeleton                   | protein binding                                               |
| ug1190_2   | 784                  |                                                                                                |                                                                                                                                                     |                                          |                                                               |
| ug1191     | 847                  | GO:0009719,GO:0007165,GO:0005576,GO:0005618,GO:0004872,GO:0003674,GO:000548                    | response to endogenous stimulus,signal transduction                                                                                                 | extracellular region,cell wall           | receptor activity,molecular_function,bi                       |
| ug1192_1   | 810                  | GO:0005198,GO:0006412                                                                          | transport                                                                                                                                           |                                          | structural molecule activity                                  |
| ug1192_2   | 374                  |                                                                                                |                                                                                                                                                     |                                          |                                                               |
| ug1193_1   | 624                  |                                                                                                |                                                                                                                                                     |                                          |                                                               |
| ug1193_2   | 509                  | GO:0003676,GO:0005198                                                                          |                                                                                                                                                     | intracellular                            | nucleic acid binding                                          |
| ug1194_1   | 532                  |                                                                                                |                                                                                                                                                     |                                          |                                                               |
| ug1194_2   | 715                  |                                                                                                |                                                                                                                                                     |                                          |                                                               |
| ug1195_1   | 1046                 | GO:0005737,GO:000987,GO:0006464,GO:0019538,GO:0009056,GO:0000166,GO:000382                     | cellular process,protein modification process,protein metabolic process,catabolic process                                                           | cytoplasm,nucleus                        | nucleotide binding,catalytic activity                         |
| ug1195_2   | 826                  | GO:0006950                                                                                     | response to stress                                                                                                                                  |                                          |                                                               |
| ug1196     | 899                  | GO:0016020                                                                                     |                                                                                                                                                     | membrane                                 |                                                               |
| ug1197_1   | 857                  | GO:0005198                                                                                     |                                                                                                                                                     |                                          | structural molecule activity                                  |
| ug1197_2   | 953                  | GO:0005215,GO:0016020,GO:0006810,GO:0009058,GO:0006091,GO:0006139,GO:0016787,GO:0005773,GO:000 | transport,biosynthetic process,generation of precursor metabolites and energy,nucleobase, nucleoside, nucleotide and nucleic acid metabolic process | membrane,vacuole,plasma membrane         | transporter activity,hydrolase activity                       |
| ug1198     | 611                  |                                                                                                |                                                                                                                                                     |                                          |                                                               |
| ug1199     | 893                  | GO:0005840,GO:0005198,GO:0006412                                                               | translation                                                                                                                                         | ribosome                                 | structural molecule activity                                  |
| ug1200     | 795                  | GO:0006091,GO:0015979,GO:0016020,GO:0009579,GO:0005488,GO:0006464,GO:000953                    | generation of precursor metabolites and energy,photosynthesis,protein modification process                                                          | membrane,thylakoid,plastid               | binding                                                       |
| ug1201     | 833                  | GO:0000166,GO:0003824                                                                          |                                                                                                                                                     |                                          | nucleotide binding,catalytic activity                         |
| ug1202     | 771                  | GO:0005730,GO:0005198,GO:0000003,GO:0009791,GO:0009790,GO:0005840,GO:0005829,GO:0006412,GO:000 | reproduction,post-embryonic development,embryonic development,translation                                                                           | nucleolus,ribosome,cytosol,mitochondrion | structural molecule activity                                  |
| ug1203     | 627                  |                                                                                                |                                                                                                                                                     |                                          |                                                               |
| ug1204     | 435                  | GO:0005739,GO:0006091                                                                          | generation of precursor metabolites and energy                                                                                                      | mitochondrion                            |                                                               |
| ug1205     | 813                  | GO:0003723                                                                                     |                                                                                                                                                     |                                          | RNA binding                                                   |
| ug1206     | 654                  |                                                                                                |                                                                                                                                                     |                                          |                                                               |
| ug1207     | 447                  | GO:0005198,GO:0005840,GO:0005829,GO:0006412,GO:0005739                                         | translation                                                                                                                                         | ribosome,cytosol,mitochondrion           | structural molecule activity                                  |
| ug1208     | 624                  |                                                                                                |                                                                                                                                                     |                                          |                                                               |
| ug1209     | 736                  | GO:0003824,GO:0005739,GO:0009058,GO:000                                                        | biosynthetic process,cellular process                                                                                                               | mitochondrion                            | catalytic activity                                            |
| ug1210     | 607                  | GO:0005886,GO:00050008150,GO:0005                                                              |                                                                                                                                                     | plasma membrane                          | binding                                                       |
| ug1211     | 792                  | GO:0005488,GO:0005773,GO:0003824,GO:000                                                        | biological_process,carbohydrate metabolic process                                                                                                   | vacuole,plasma membrane                  | binding,catalytic activity                                    |
| ug1212     | 504                  | GO:0005829,GO:0005                                                                             |                                                                                                                                                     | cytosol,plasma membrane                  |                                                               |

| Unigene ID | sequence length (bp) | GO-ID               | Biological process                    | Cellular component                     | Molecular function             |
|------------|----------------------|---------------------|---------------------------------------|----------------------------------------|--------------------------------|
| ug1213     | 553                  | GO:0016787,GO:0008  | metabolic process                     |                                        | hydrolase activity             |
|            |                      | GO:0006810,GO:0006  | transport,generation of precursor     |                                        |                                |
| ug1214     | 541                  | 091,GO:0006139,GO:0 | metabolites and energy,nucleobase,    | membrane,intracellular,thylakoid,pla   | transporter activity           |
|            |                      | 009058,GO:0005215,G | nucleoside, nucleotide and nucleic    | stid                                   |                                |
|            |                      | O:0016020,GO:000562 | acid metabolic process,biosynthetic   |                                        |                                |
|            |                      | 2,GO:0009579,GO:000 | process                               |                                        |                                |
| ug1215     | 696                  |                     |                                       |                                        |                                |
| ug1216     | 700                  |                     |                                       |                                        |                                |
| ug1217     | 715                  |                     |                                       |                                        |                                |
| ug1218     | 951                  |                     |                                       |                                        |                                |
| ug1219     | 458                  |                     |                                       |                                        |                                |
| ug1220     | 821                  | GO:0016043,GO:0009  | cellular component                    |                                        |                                |
|            |                      | 987,GO:0005737,GO:0 | organization,cellular process         | cytoplasm,cytoskeleton                 | protein binding                |
|            |                      | 005515,GO:0005856   |                                       |                                        |                                |
| ug1221     | 829                  | GO:0030234          |                                       |                                        | enzyme regulator activity      |
| ug1222_1   | 911                  | GO:0003824,GO:0016  | biosynthetic process,cellular         | membrane,endoplasmic reticulum         | catalytic activity             |
|            |                      | 020,GO:0005783,GO:0 | process,lipid metabolic process       |                                        |                                |
|            |                      | 009058,GO:0009987,G |                                       |                                        |                                |
| ug1222_2   | 790                  |                     |                                       |                                        |                                |
|            |                      | GO:0003674,GO:0005  |                                       |                                        |                                |
|            |                      | 488,GO:0003824,GO:0 |                                       |                                        |                                |
| ug1223     | 942                  | 006950,GO:0009628,G | response to stress,response to        | cell wall,nucleus,extracellular region | molecular_function,binding,c   |
|            |                      | O:0005618,GO:000016 | abiotic stimulus,biosynthetic         |                                        | atalytic activity,nucleotide   |
|            |                      | 6,GO:0009058,GO:000 | process,cellular process              |                                        | binding                        |
|            |                      | 9987,GO:0005634,GO: |                                       |                                        |                                |
|            |                      | GO:0005622,GO:0003  |                                       |                                        |                                |
| ug1224     | 1147                 | 677,GO:0016043,GO:0 | cellular component                    | intracellular,nucleus                  | DNA binding                    |
|            |                      | 009987,GO:0005634   | organization,cellular process         |                                        |                                |
| ug1225     | 864                  | GO:0016020,GO:0009  | photosynthesis                        | membrane,thylakoid,plastid             |                                |
|            |                      | 579,GO:0009536,GO:0 |                                       |                                        |                                |
| ug1226     | 998                  |                     |                                       |                                        |                                |
| ug1227     | 926                  | GO:0016740,GO:0003  | transcription                         | nucleus                                | transferase activity,DNA       |
|            |                      | 677,GO:0006350,GO:0 |                                       |                                        | binding                        |
|            |                      | GO:0016020,GO:0009  |                                       |                                        |                                |
| ug1228_1   | 840                  | 579,GO:0009536,GO:0 | photosynthesis                        | membrane,thylakoid,plastid             |                                |
| ug1228_2   | 785                  |                     |                                       |                                        |                                |
|            |                      | GO:0009058,GO:0009  | biosynthetic process,cellular         |                                        |                                |
| ug1229     | 462                  | 987,GO:0006629,GO:0 | process,lipid metabolic               | plastid                                | binding,catalytic activity     |
|            |                      | 005488,GO:0008152,G | process,metabolic process             |                                        |                                |
|            |                      | O:0003824,GO:000953 |                                       |                                        |                                |
|            |                      | GO:0006810,GO:0005  |                                       |                                        |                                |
| ug1230     | 1036                 | 886,GO:0000166,GO:0 | transport,signal transduction         | plasma membrane                        | nucleotide binding             |
| ug1231     | 981                  | GO:0005488,GO:0009  | metabolic process                     | plastid                                | binding,catalytic activity     |
|            |                      | 536,GO:0003824,GO:0 |                                       |                                        |                                |
| ug1232     | 860                  |                     |                                       |                                        |                                |
|            |                      | GO:0016787,GO:0005  |                                       |                                        |                                |
| ug1233     | 932                  | 737,GO:0008152,GO:0 | metabolic process,cellular process    | cytoplasm                              | hydrolase activity,binding     |
|            |                      | 009987,GO:0005488   |                                       |                                        |                                |
| ug1234     | 677                  | GO:0005737,GO:0005  | protein modification process          | cytoplasm,nucleus                      |                                |
|            |                      | 634,GO:0006464      |                                       |                                        |                                |
|            |                      | GO:0009987,GO:0006  | cellular process,lipid metabolic      |                                        |                                |
| ug1235     | 471                  | 629,GO:0005777,GO:0 | process,reproduction,post-            | peroxisome                             | molecular_function,catalytic   |
|            |                      | 003674,GO:0000003,G | embryonic development,embryonic       |                                        | activity,nucleotide binding    |
|            |                      | O:0009791,GO:000979 | development,catabolic process         |                                        |                                |
|            |                      | 0,GO:0009056,GO:000 |                                       |                                        |                                |
| ug1236     | 1098                 | GO:0009579,GO:0009  |                                       | thylakoid,plastid                      |                                |
| ug1237_1   | 676                  | GO:0016020,GO:0005  |                                       | membrane,mitochondrion                 | catalytic activity,transporter |
|            |                      | 739,GO:0003824,GO:0 |                                       |                                        | activity                       |
| ug1237_2   | 1524                 | GO:0005623,GO:0016  |                                       | cell,membrane                          |                                |
|            |                      | GO:0019538,GO:0009  | protein metabolic process,catabolic   |                                        |                                |
| ug1238     | 945                  | 056,GO:0009987,GO:0 | process,cellular process,protein      |                                        | catalytic activity             |
|            |                      | 006464,GO:0003824   | modification process                  |                                        |                                |
| ug1239     | 920                  | GO:0005634,GO:0003  |                                       | nucleus                                | DNA binding                    |
| ug1240     | 631                  | GO:0006950,GO:0009  | response to stress,response to biotic |                                        |                                |
|            |                      | 607,GO:0005576,GO:0 | stimulus,metabolic process,cellular   | extracellular region                   | hydrolase activity             |
|            |                      | 008152,GO:0009987,G | process                               |                                        |                                |
| ug1241     | 1163                 | GO:0006464,GO:0000  | protein modification process          |                                        | nucleotide binding,kinase      |
|            |                      | 166,GO:0016301      |                                       |                                        | activity                       |
|            |                      | GO:0005515,GO:0005  |                                       |                                        |                                |
| ug1242_1   | 602                  | 215,GO:0006810,GO:0 | transport,cellular component          | membrane,mitochondrion,plastid         | protein binding,transporter    |
|            |                      | 016043,GO:0009987,G | organization,cellular process         |                                        | activity                       |
|            |                      | O:0016020,GO:000573 |                                       |                                        |                                |
|            |                      | GO:0003824,GO:0003  |                                       |                                        |                                |
| ug1242_2   | 863                  | 674,GO:0005488,GO:0 | transport,generation of precursor     | membrane,thylakoid,plastid             | catalytic                      |
|            |                      | 006810,GO:0016020,G | metabolites and energy                |                                        | activity,molecular_function,bi |
|            |                      | O:0009579,GO:000953 |                                       |                                        | nding                          |
|            |                      | GO:0016301,GO:0005  | generation of precursor metabolites   |                                        |                                |
| ug1243     | 562                  | 829,GO:0000166,GO:0 | and energy,carbohydrate metabolic     | cytosol                                | kinase activity,nucleotide     |
|            |                      | 006091,GO:0005975,G | process,catabolic process             |                                        | binding                        |



| Unigene ID | sequence length (bp) | GO-ID                                                                                                                                                                                                          | Biological process                                                                                                                                  | Cellular component                                   | Molecular function                                       |
|------------|----------------------|----------------------------------------------------------------------------------------------------------------------------------------------------------------------------------------------------------------|-----------------------------------------------------------------------------------------------------------------------------------------------------|------------------------------------------------------|----------------------------------------------------------|
| ug1244     | 611                  | GO:0005739,GO:0005886,GO:0016020,GO:0006091,GO:0000                                                                                                                                                            |                                                                                                                                                     | mitochondrion,plasma membrane,membrane,intracellular |                                                          |
| ug1245     | 1043                 | 166,GO:0016020,GO:005622,GO:0003674,GO:0008152,GO:000573                                                                                                                                                       | generation of precursor metabolites and energy,metabolic process                                                                                    | membrane,intracellular,mitochondrion                 | nucleotide binding,molecular_function,catalytic activity |
| ug1246     | 509                  | GO:0005840,GO:0005                                                                                                                                                                                             |                                                                                                                                                     | ribosome,mitochondrion                               |                                                          |
| ug1247     | 1014                 | GO:0005886                                                                                                                                                                                                     |                                                                                                                                                     | plasma membrane                                      |                                                          |
| ug1248_1   | 723                  | GO:0019538,GO:0009056,GO:0009987,GO:0                                                                                                                                                                          | protein metabolic process,catabolic process,cellular process                                                                                        |                                                      | protein binding                                          |
| ug1248_2   | 839                  |                                                                                                                                                                                                                |                                                                                                                                                     |                                                      |                                                          |
| ug1249     | 647                  | GO:0005840,GO:0005198,GO:0006412                                                                                                                                                                               | translation                                                                                                                                         | ribosome                                             | structural molecule activity                             |
| ug1250     | 609                  | GO:0009536                                                                                                                                                                                                     |                                                                                                                                                     | plastid                                              |                                                          |
| ug1251     | 512                  |                                                                                                                                                                                                                |                                                                                                                                                     |                                                      |                                                          |
| ug1252     | 747                  | GO:0005622,GO:0003677,GO:0016043,GO:009987,GO:0005634,GO:0006950,GO:0009607,GO:0008152,GO:0                                                                                                                    | cellular component organization,cellular process                                                                                                    | intracellular,nucleus                                | DNA binding                                              |
| ug1253     | 943                  | 009987,GO:0009536,GO:0005488,GO:0009579,GO:0005576,GO:0005488,GO:0005618,GO:0003824,GO:0005622,GO:0003677,GO:0016043,GO:009987,GO:0005634                                                                      | response to stress,response to biotic stimulus,metabolic process,cellular process                                                                   | plastid,thylakoid,extracellular region               | binding,catalytic activity                               |
| ug1254     | 534                  | 618,GO:0003824,GO:0005622,GO:0003677,GO:0016043,GO:009987,GO:0005634                                                                                                                                           | response to stress                                                                                                                                  | cell wall                                            | binding,catalytic activity                               |
| ug1255     | 551                  | 677,GO:0016043,GO:009987,GO:0005634                                                                                                                                                                            | cellular component organization,cellular process                                                                                                    | intracellular,nucleus                                | DNA binding                                              |
| ug1256     | 712                  |                                                                                                                                                                                                                |                                                                                                                                                     |                                                      |                                                          |
| ug1257     | 595                  | GO:0006810,GO:0016020,GO:0005215                                                                                                                                                                               | transport                                                                                                                                           | membrane                                             | transporter activity                                     |
| ug1258     | 416                  |                                                                                                                                                                                                                |                                                                                                                                                     |                                                      |                                                          |
| ug1259     | 1353                 | GO:0009579,GO:0009536,GO:0006950,GO:0005488,GO:0008152,GO:0003824,GO:0016020,GO:0016043,GO:0007049,GO:0005488,GO:005856,GO:0005737,GO:0019538,GO:0009987,GO:0005737,GO:000166,GO:0005515,GO:0009579,GO:0003677 | response to stress,metabolic process                                                                                                                | thylakoid,plastid,membrane                           | binding,catalytic activity                               |
| ug1260     | 760                  | 049,GO:0005488,GO:005856,GO:0005737,GO:0019538,GO:0009987,GO:0005737,GO:000166,GO:0005515,GO:0009579,GO:0003677                                                                                                | cellular component organization,cell cycle,cellular process                                                                                         | cytoskeleton,cytoplasm                               | binding                                                  |
| ug1261     | 770                  |                                                                                                                                                                                                                |                                                                                                                                                     |                                                      |                                                          |
| ug1262     | 751                  | GO:0019538,GO:0009987,GO:0005737,GO:000166,GO:0005515,GO:0009579,GO:0003677                                                                                                                                    | protein metabolic process,cellular process                                                                                                          | cytoplasm                                            | nucleotide binding,protein binding                       |
| ug1263     | 662                  | 824,GO:0016020,GO:009536,GO:0015979,GO:0005198,GO:0009                                                                                                                                                         | photosynthesis                                                                                                                                      | thylakoid,membrane,plastid                           | catalytic activity                                       |
| ug1264     | 542                  | 987,GO:0005840,GO:005829,GO:0006412,GO:0005623,GO:0003                                                                                                                                                         | cellular process,translation                                                                                                                        | ribosome,cytosol                                     | structural molecule activity                             |
| ug1265     | 565                  | 824,GO:0005215,GO:0016020,GO:0005739                                                                                                                                                                           |                                                                                                                                                     | cell,membrane,mitochondrion                          | catalytic activity,transporter activity                  |
| ug1266     | 952                  | GO:0005737                                                                                                                                                                                                     |                                                                                                                                                     | cytoplasm                                            |                                                          |
| ug1267     | 867                  | GO:0005840,GO:0005198,GO:0006412                                                                                                                                                                               | translation                                                                                                                                         | ribosome                                             | structural molecule activity                             |
| ug1268     | 1311                 | GO:0016020,GO:0005739,GO:0005488,GO:0                                                                                                                                                                          | transport                                                                                                                                           | membrane,mitochondrion                               | binding                                                  |
| ug1269_1   | 1014                 |                                                                                                                                                                                                                |                                                                                                                                                     |                                                      |                                                          |
| ug1269_2   | 936                  | GO:0005215,GO:0016020,GO:0006810,GO:009058,GO:0006091,GO:0006139,GO:0016787,GO:0005773,GO:0005576,GO:0005488,GO:0003674                                                                                        | transport,biosynthetic process,generation of precursor metabolites and energy,nucleobase, nucleoside, nucleotide and nucleic acid metabolic process | membrane,vacuole,plasma membrane                     | transporter activity,hydrolase activity                  |
| ug1270     | 479                  | GO:0005576,GO:0005488,GO:0003674                                                                                                                                                                               |                                                                                                                                                     | extracellular region                                 | binding,molecular_function                               |
| ug1271     | 1054                 | GO:0005488,GO:0005737,GO:0003824,GO:0003723,GO:0006412,GO:0008135,GO:0009719,GO:0007165,GO:0005576,GO:005618,GO:0004872,GO:0003674,GO:000548                                                                   | metabolic process                                                                                                                                   | cytoplasm                                            | binding,catalytic activity                               |
| ug1272     | 715                  | GO:0003723,GO:0006412,GO:0008135,GO:0009719,GO:0007165,GO:0005576,GO:005618,GO:0004872,GO:0003674,GO:000548                                                                                                    | translation                                                                                                                                         |                                                      | RNA binding,translation factor activity, nucleic acid    |
| ug1273     | 869                  | 165,GO:0005576,GO:005618,GO:0004872,GO:0003674,GO:000548                                                                                                                                                       | response to endogenous stimulus,signal transduction                                                                                                 | extracellular region,cell wall                       | receptor activity,molecular_function,bi nding            |
| ug1274     | 635                  |                                                                                                                                                                                                                |                                                                                                                                                     |                                                      |                                                          |
| ug1275_1   | 812                  | GO:0006950,GO:0005                                                                                                                                                                                             | response to stress                                                                                                                                  | vacuole                                              |                                                          |
| ug1275_2   | 1275                 | GO:0005840,GO:0003723,GO:0005198,GO:0                                                                                                                                                                          | translation                                                                                                                                         | ribosome                                             | RNA binding,structural molecule activity                 |
| ug1276     | 846                  |                                                                                                                                                                                                                |                                                                                                                                                     |                                                      |                                                          |
| ug1277_1   | 702                  |                                                                                                                                                                                                                |                                                                                                                                                     |                                                      |                                                          |

| Unigene ID | sequence length (bp) | GO-ID                                                                                                                               | Biological process                                                                        | Cellular component                              | Molecular function                                    |
|------------|----------------------|-------------------------------------------------------------------------------------------------------------------------------------|-------------------------------------------------------------------------------------------|-------------------------------------------------|-------------------------------------------------------|
| ug1277_2   | 544                  | GO:0016740,GO:0003677,GO:0006350,GO:0                                                                                               | transcription                                                                             | nucleus                                         | transferase activity,DNA binding                      |
| ug1278     | 672                  |                                                                                                                                     |                                                                                           |                                                 |                                                       |
| ug1279     | 920                  |                                                                                                                                     |                                                                                           |                                                 |                                                       |
| ug1280     | 1087                 | GO:0016020,GO:0009579,GO:0006091,GO:015979,GO:0009536,GO:0005730,GO:0005                                                            | generation of precursor metabolites and energy,photosynthesis                             | membrane,thylakoid,plastid                      |                                                       |
| ug1281     | 841                  | 198,GO:0005840,GO:0005829,GO:0006412                                                                                                | translation                                                                               | nucleolus,ribosome,cytosol                      | structural molecule activity                          |
| ug1282     | 930                  |                                                                                                                                     |                                                                                           |                                                 |                                                       |
| ug1283     | 493                  | GO:0016020,GO:0005739,GO:0006091,GO:0                                                                                               | generation of precursor metabolites and energy,transport                                  | membrane,mitochondrion                          |                                                       |
| ug1284     | 824                  | GO:0030528,GO:0009701                                                                                                               |                                                                                           | plastid                                         | transcription regulator                               |
| ug1285_1   | 701                  |                                                                                                                                     |                                                                                           |                                                 |                                                       |
| ug1285_2   | 695                  | GO:0005739,GO:0005488,GO:0005515                                                                                                    |                                                                                           | mitochondrion                                   | binding,protein binding                               |
| ug1286     | 754                  | GO:0005634                                                                                                                          |                                                                                           | nucleus                                         |                                                       |
| ug1287     | 546                  |                                                                                                                                     |                                                                                           |                                                 |                                                       |
| ug1288     | 1107                 | GO:0000166,GO:0005794,GO:0005737,GO:0006810,GO:0009987,GO:0005840,GO:0005198,GO:0006412                                             | transport,cellular process                                                                | Golgi apparatus,cytoplasm,endoplasmic reticulum | nucleotide binding                                    |
| ug1289     | 690                  | GO:0005840,GO:0005198,GO:0006412                                                                                                    | translation                                                                               | ribosome                                        | structural molecule activity                          |
| ug1290     | 809                  |                                                                                                                                     |                                                                                           |                                                 |                                                       |
| ug1291     | 181                  |                                                                                                                                     |                                                                                           |                                                 |                                                       |
| ug1292     | 533                  | GO:0003824,GO:0005215,GO:0005739,GO:0                                                                                               | generation of precursor metabolites and energy                                            | mitochondrion                                   | catalytic activity,transporter activity               |
| ug1293     | 620                  |                                                                                                                                     |                                                                                           |                                                 |                                                       |
| ug1294     | 960                  | GO:0005840,GO:0005198,GO:0006412                                                                                                    | translation                                                                               | ribosome                                        | structural molecule activity                          |
| ug1295     | 573                  | GO:0005840,GO:0005198,GO:0006412,GO:0005488,GO:0005                                                                                 | translation                                                                               | ribosome                                        | structural molecule activity                          |
| ug1296     | 915                  | 515,GO:0005215,GO:0016020,GO:0005739,GO:0006810,GO:001604,GO:0006412,GO:0008135                                                     | transport,cellular component organization,cellular process                                | membrane,mitochondrion                          | binding,protein binding,transporter activity          |
| ug1297     | 1212                 | GO:0005515,GO:0005215,GO:0006810,GO:0016043,GO:0009987,GO:0016020,GO:0005739,GO:0005737,GO:0009058,GO:0006519,GO:0005488,GO:0016740 | transport,cellular component organization,cellular process                                | membrane,mitochondrion,plastid                  | protein binding,transporter activity                  |
| ug1298     | 600                  | GO:0005840,GO:0005198,GO:0006412                                                                                                    | translation                                                                               | ribosome                                        | structural molecule activity                          |
| ug1299     | 772                  | GO:0003824,GO:0008152,GO:0005488                                                                                                    | metabolic process                                                                         | cytoplasm                                       | binding,transferase activity                          |
| ug1300     | 788                  | GO:0005840,GO:0005198,GO:0006412                                                                                                    | translation                                                                               | ribosome                                        | structural molecule activity                          |
| ug1301     | 813                  |                                                                                                                                     |                                                                                           |                                                 |                                                       |
| ug1302_1   | 561                  | GO:0003824,GO:0008152,GO:0005488                                                                                                    | metabolic process                                                                         |                                                 | catalytic activity,binding                            |
| ug1302_2   | 778                  | GO:0005488,GO:0003674,GO:0005739                                                                                                    |                                                                                           | mitochondrion                                   | binding,molecular_function                            |
| ug1303_1   | 915                  | GO:0005840,GO:0005198,GO:0006412                                                                                                    | translation                                                                               | ribosome                                        | structural molecule activity                          |
| ug1303_2   | 823                  |                                                                                                                                     |                                                                                           |                                                 |                                                       |
| ug1304     | 857                  | GO:0006810,GO:0009987,GO:0000166,GO:0005515,GO:0007165,GO:0005634,GO:001678                                                         | transport,cellular process,signal transduction                                            | nucleus                                         | nucleotide binding,protein binding,hydrolase activity |
| ug1305     | 753                  | GO:0019538,GO:0009987,GO:0003824,GO:0006464                                                                                         | protein metabolic process,catabolic process,cellular process,protein modification process |                                                 | catalytic activity                                    |
| ug1306     | 854                  | GO:0005488                                                                                                                          |                                                                                           |                                                 | binding                                               |
| ug1307_1   | 1121                 |                                                                                                                                     |                                                                                           |                                                 |                                                       |
| ug1307_2   | 581                  | GO:0005840                                                                                                                          |                                                                                           | ribosome                                        |                                                       |
| ug1308     | 773                  | GO:0005622,GO:0003677,GO:0016043,GO:0009987,GO:0005634                                                                              | cellular component organization,cellular process                                          | intracellular,nucleus                           | DNA binding                                           |
| ug1309     | 1170                 | GO:0005488                                                                                                                          |                                                                                           |                                                 | binding                                               |
| ug1310     | 784                  | GO:0006810,GO:0009987,GO:0005515,GO:0005635,GO:0005215                                                                              | transport,cellular process                                                                | nuclear envelope                                | protein binding,transporter activity                  |
| ug1311     | 656                  |                                                                                                                                     |                                                                                           |                                                 |                                                       |
| ug1312     | 779                  |                                                                                                                                     |                                                                                           |                                                 |                                                       |
| ug1313     | 817                  |                                                                                                                                     |                                                                                           |                                                 |                                                       |
| ug1314     | 689                  | GO:0030528,GO:0005515,GO:0006350                                                                                                    | transcription                                                                             |                                                 | transcription regulator activity,protein binding      |
| ug1315     | 846                  |                                                                                                                                     |                                                                                           |                                                 |                                                       |
| ug1316     | 703                  |                                                                                                                                     |                                                                                           |                                                 |                                                       |

| Unigene ID | sequence length (bp) | GO-ID                                                                                                                                              | Biological process                                                                                                                   | Cellular component                         | Molecular function                                    |
|------------|----------------------|----------------------------------------------------------------------------------------------------------------------------------------------------|--------------------------------------------------------------------------------------------------------------------------------------|--------------------------------------------|-------------------------------------------------------|
| ug1317     | 917                  | GO:0003677,GO:0003824,GO:0008152,GO:0005886,GO:0005                                                                                                | metabolic process,cellular process                                                                                                   |                                            | DNA binding,catalytic activity                        |
| ug1318     | 1141                 | 773,GO:0016020,GO:0005215,GO:0006810,GO:0005215,GO:0016020,GO:0005739,GO:0                                                                         | transport                                                                                                                            | plasma membrane,vacuole,membrane           | transporter activity                                  |
| ug1319     | 846                  | 006810,GO:0009058,GO:0006091,GO:0006139                                                                                                            | metabolites and energy,nucleobase, nucleoside, nucleotide and nucleic acid metabolic process                                         | membrane,mitochondrion                     | transporter activity                                  |
| ug1320     | 245                  |                                                                                                                                                    |                                                                                                                                      |                                            |                                                       |
| ug1321     | 827                  | GO:0006810                                                                                                                                         | transport                                                                                                                            |                                            |                                                       |
| ug1322     | 1006                 |                                                                                                                                                    |                                                                                                                                      |                                            |                                                       |
| ug1323     | 800                  |                                                                                                                                                    |                                                                                                                                      |                                            |                                                       |
| ug1324     | 945                  |                                                                                                                                                    |                                                                                                                                      |                                            |                                                       |
| ug1325_1   | 759                  | GO:0008150                                                                                                                                         | biological_process                                                                                                                   |                                            |                                                       |
| ug1325_2   | 1441                 | GO:0006519,GO:0019748,GO:0003824                                                                                                                   | cellular amino acid and derivative metabolic process,secondary metabolic process                                                     |                                            | catalytic activity                                    |
| ug1326     | 517                  |                                                                                                                                                    |                                                                                                                                      |                                            |                                                       |
| ug1327     | 773                  | GO:0005840,GO:0005198,GO:0006412                                                                                                                   | translation                                                                                                                          | ribosome                                   | structural molecule activity                          |
| ug1328     | 1042                 | GO:0016020,GO:0006810,GO:0009987,GO:0                                                                                                              | transport,cellular process                                                                                                           | membrane,Golgi apparatus                   |                                                       |
| ug1329     | 874                  | GO:0006350                                                                                                                                         | transcription                                                                                                                        |                                            |                                                       |
| ug1330_1   | 576                  | GO:0006810                                                                                                                                         | transport                                                                                                                            |                                            |                                                       |
| ug1330_2   | 815                  |                                                                                                                                                    |                                                                                                                                      |                                            |                                                       |
| ug1331     | 759                  | GO:0016787,GO:0030234                                                                                                                              |                                                                                                                                      |                                            | hydrolase activity,enzyme regulator activity          |
| ug1332_1   | 507                  | GO:0005488,GO:0016020,GO:0005618,GO:0003824,GO:0003674,G                                                                                           | response to stress                                                                                                                   | membrane,cell wall                         | binding,catalytic activity,molecular_function         |
| ug1332_2   | 894                  |                                                                                                                                                    |                                                                                                                                      |                                            |                                                       |
| ug1333     | 508                  |                                                                                                                                                    |                                                                                                                                      |                                            |                                                       |
| ug1334_1   | 1008                 | GO:0005622,GO:0003677,GO:0016043,GO:0009987,GO:0005634                                                                                             | cellular component organization,cellular process                                                                                     | intracellular,nucleus                      | DNA binding                                           |
| ug1334_2   | 1137                 |                                                                                                                                                    |                                                                                                                                      |                                            |                                                       |
| ug1335     | 918                  | GO:0006810,GO:000987,GO:0000166,GO:0005515,GO:0007165,GO:0005634,GO:001678                                                                         | transport,cellular process,signal transduction                                                                                       | nucleus                                    | nucleotide binding,protein binding,hydrolase activity |
| ug1336     | 669                  |                                                                                                                                                    |                                                                                                                                      |                                            |                                                       |
| ug1337     | 937                  | GO:0006810,GO:000987,GO:0006950,GO:0009628,GO:0005773,GO:0009607,GO:0016787,GO:0005215,GO:0009605,GO:0005737,GO:0005515,GO:0005215,GO:0009536,GO:0 | transport,cellular process,response to stress,response to abiotic stimulus,response to biotic stimulus,response to external stimulus | vacuole,cytoplasm,plasma membrane,membrane | hydrolase activity,transporter activity               |
| ug1338     | 847                  | GO:0005840,GO:0005215,GO:0009536,GO:0                                                                                                              | transport                                                                                                                            | plastid                                    | protein binding,transporter activity                  |
| ug1339     | 792                  |                                                                                                                                                    |                                                                                                                                      |                                            |                                                       |
| ug1340     | 730                  | GO:0005739,GO:0005                                                                                                                                 |                                                                                                                                      | mitochondrion,plasma membrane              |                                                       |
| ug1341     | 590                  | GO:0005840,GO:0005198,GO:0006412                                                                                                                   | translation                                                                                                                          | ribosome                                   | structural molecule activity                          |
| ug1342     | 717                  |                                                                                                                                                    |                                                                                                                                      |                                            |                                                       |
| ug1343     | 497                  | GO:0030246                                                                                                                                         |                                                                                                                                      |                                            | carbohydrate binding                                  |
| ug1344     | 979                  | GO:0005840,GO:0005198,GO:0003723,GO:0006412,GO:0006139                                                                                             | translation,nucleobase, nucleoside, nucleotide and nucleic acid metabolic process                                                    | ribosome                                   | structural molecule activity,RNA binding              |
| ug1345     | 979                  | GO:0030234,GO:0019725,GO:0009536,GO:0                                                                                                              | cellular homeostasis,biological_process                                                                                              | plastid                                    | enzyme regulator activity                             |
| ug1346     | 626                  | GO:0008289,GO:0006                                                                                                                                 | transport                                                                                                                            |                                            | lipid binding                                         |
| ug1347     | 544                  |                                                                                                                                                    |                                                                                                                                      |                                            |                                                       |
| ug1348     | 1075                 | GO:0005840,GO:0005198,GO:0006412                                                                                                                   | translation                                                                                                                          | ribosome                                   | structural molecule activity                          |
| ug1349     | 641                  |                                                                                                                                                    |                                                                                                                                      |                                            |                                                       |
| ug1350     | 713                  | GO:0009536                                                                                                                                         |                                                                                                                                      | plastid                                    |                                                       |
| ug1351_1   | 769                  |                                                                                                                                                    |                                                                                                                                      |                                            |                                                       |
| ug1351_2   | 1072                 | GO:0005622,GO:0003677,GO:0016043,GO:0009987,GO:0005634                                                                                             | cellular component organization,cellular process                                                                                     | intracellular,nucleus                      | DNA binding                                           |
| ug1352     | 654                  | GO:0005840,GO:0005198,GO:0006412                                                                                                                   | translation                                                                                                                          | ribosome                                   | structural molecule activity                          |
| ug1353     | 1239                 | GO:0006810,GO:0016020,GO:0005215                                                                                                                   | transport                                                                                                                            | membrane                                   | transporter activity                                  |
| ug1354     | 633                  |                                                                                                                                                    |                                                                                                                                      |                                            |                                                       |
| ug1355     | 769                  | GO:0005840,GO:0005198,GO:0006412                                                                                                                   | translation                                                                                                                          | ribosome                                   | structural molecule activity                          |

| Unigene ID | sequence length (bp) | GO-ID                                                                                                                                                                                                            | Biological process                                                                                                                                  | Cellular component                      | Molecular function                                         |
|------------|----------------------|------------------------------------------------------------------------------------------------------------------------------------------------------------------------------------------------------------------|-----------------------------------------------------------------------------------------------------------------------------------------------------|-----------------------------------------|------------------------------------------------------------|
| ug1356     | 750                  | GO:0005840,GO:0005198,GO:0009987,GO:0009536,GO:0006412,GO:0019725,GO:0003824,GO:0005488,GO:0003824,GO:0000166,GO:0008152,GO:0005198,GO:0005840,GO:0009536,GO:0006412,GO:0003723,GO:0016020,GO:0006810,GO:0009987 | cellular process,translation                                                                                                                        | ribosome,plastid,mitochondrion          | structural molecule activity                               |
| ug1357     | 463                  | GO:0019725,GO:0003824,GO:0005488,GO:0003824,GO:0000166,GO:0008152,GO:0005198,GO:0005840,GO:0009536,GO:0006412,GO:0003723,GO:0016020,GO:0006810,GO:0009987                                                        | cellular homeostasis,transport                                                                                                                      |                                         | catalytic activity,binding                                 |
| ug1358     | 949                  | GO:0003824,GO:0000166,GO:0008152,GO:0005198,GO:0005840,GO:0009536,GO:0006412,GO:0003723,GO:0016020,GO:0006810,GO:0009987                                                                                         | metabolic process,transcription                                                                                                                     |                                         | catalytic activity,nucleotide binding                      |
| ug1359     | 640                  | GO:0005840,GO:0009536,GO:0006412,GO:0003723,GO:0016020,GO:0006810,GO:0009987                                                                                                                                     | translation                                                                                                                                         | ribosome,plastid,mitochondrion          | structural molecule activity,RNA binding                   |
| ug1360     | 993                  | GO:0016020,GO:0006810,GO:0009987                                                                                                                                                                                 | transport,cellular process                                                                                                                          | membrane                                |                                                            |
| ug1361     | 1143                 | GO:0000166                                                                                                                                                                                                       |                                                                                                                                                     |                                         | nucleotide binding                                         |
| ug1362     | 868                  | GO:0005488                                                                                                                                                                                                       |                                                                                                                                                     |                                         | binding                                                    |
| ug1363     | 963                  |                                                                                                                                                                                                                  |                                                                                                                                                     |                                         |                                                            |
| ug1364_1   | 971                  |                                                                                                                                                                                                                  |                                                                                                                                                     |                                         |                                                            |
| ug1364_2   | 960                  | GO:0005840,GO:0005198,GO:0003723,GO:0006412,GO:0006139,GO:0005576,GO:0006950,GO:0005618                                                                                                                          | translation,nucleobase, nucleoside, nucleotide and nucleic acid metabolic process                                                                   | ribosome                                | structural molecule activity,RNA binding                   |
| ug1365     | 556                  | GO:0005576,GO:0006950,GO:0005618                                                                                                                                                                                 | response to stress                                                                                                                                  | extracellular region,cell wall          |                                                            |
| ug1366     | 971                  | GO:0019538,GO:0009987,GO:0005829,GO:0005634                                                                                                                                                                      | protein metabolic process,cellular process                                                                                                          | cytosol                                 | protein binding                                            |
| ug1367     | 621                  | GO:0005634                                                                                                                                                                                                       |                                                                                                                                                     | nucleus                                 |                                                            |
| ug1368     | 212                  |                                                                                                                                                                                                                  |                                                                                                                                                     |                                         |                                                            |
| ug1369     | 704                  |                                                                                                                                                                                                                  |                                                                                                                                                     |                                         |                                                            |
| ug1370_1   | 876                  |                                                                                                                                                                                                                  |                                                                                                                                                     |                                         |                                                            |
| ug1370_2   | 631                  | GO:0006139,GO:0009987,GO:0000166,GO:0016020,GO:0016787,GO:0005634                                                                                                                                                | nucleobase, nucleoside, nucleotide and nucleic acid metabolic process,biosynthetic process                                                          | membrane                                | nucleotide binding,hydrolase activity,transporter activity |
| ug1371     | 548                  |                                                                                                                                                                                                                  |                                                                                                                                                     |                                         |                                                            |
| ug1372     | 926                  | GO:0005515                                                                                                                                                                                                       |                                                                                                                                                     |                                         | protein binding                                            |
| ug1373     | 1354                 | GO:0019538,GO:0009987,GO:0008150,GO:0005634                                                                                                                                                                      | protein metabolic process,catabolic process,biological_process                                                                                      |                                         | hydrolase activity                                         |
| ug1374_1   | 255                  |                                                                                                                                                                                                                  |                                                                                                                                                     |                                         |                                                            |
| ug1374_2   | 1130                 |                                                                                                                                                                                                                  |                                                                                                                                                     |                                         |                                                            |
| ug1375     | 885                  | GO:0005737,GO:0005773,GO:0005886,GO:0019538,GO:0009987,GO:0005829,GO:0005634                                                                                                                                     | protein metabolic process,catabolic process,cellular process,protein modification process                                                           | cytoplasm,vacuole,plasma membrane       |                                                            |
| ug1376_1   | 797                  | GO:0005829,GO:0005634                                                                                                                                                                                            |                                                                                                                                                     |                                         | catalytic activity                                         |
| ug1376_2   | 368                  |                                                                                                                                                                                                                  |                                                                                                                                                     |                                         |                                                            |
| ug1377_1   | 878                  | GO:0005886                                                                                                                                                                                                       |                                                                                                                                                     | plasma membrane                         |                                                            |
| ug1377_2   | 752                  | GO:0005622,GO:000677,GO:0016043,GO:0009987,GO:0005634                                                                                                                                                            | cellular component organization,cellular process                                                                                                    | intracellular,nucleus                   | DNA binding                                                |
| ug1378     | 670                  | GO:0005840,GO:0005198,GO:0006412,GO:0008150,GO:0005840,GO:0009579,GO:0005739,GO:0009536                                                                                                                          | translation                                                                                                                                         | ribosome                                | structural molecule activity                               |
| ug1379     | 916                  | GO:0005840,GO:0009579,GO:0005739,GO:0009536                                                                                                                                                                      | biological_process                                                                                                                                  | vacuole,thylakoid,mitochondrion,plastid |                                                            |
| ug1380     | 845                  | GO:0009536                                                                                                                                                                                                       |                                                                                                                                                     | plastid                                 |                                                            |
| ug1381     | 874                  | GO:0005488,GO:0008152,GO:0003824                                                                                                                                                                                 | metabolic process                                                                                                                                   |                                         | binding,catalytic activity                                 |
| ug1382     | 611                  | GO:0006810                                                                                                                                                                                                       | transport                                                                                                                                           |                                         |                                                            |
| ug1383     | 678                  | GO:0005215,GO:0016020,GO:0006810,GO:0009058,GO:0006091,GO:0006139,GO:0005622,GO:0009536,GO:0019538,GO:0005840,GO:0005198,GO:0006412,GO:0005488,GO:0008152,GO:0003824,GO:0003674,GO:0006950                       | transport,biosynthetic process,generation of precursor metabolites and energy,nucleobase, nucleoside, nucleotide and nucleic acid metabolic process | membrane,intracellular,plastid          | transporter activity,hydrolase activity                    |
| ug1384     | 828                  | GO:0005840,GO:0005198,GO:0006412                                                                                                                                                                                 | translation                                                                                                                                         | ribosome                                | structural molecule activity                               |
| ug1385     | 1262                 | GO:0005488,GO:0008152,GO:0003824,GO:0003674,GO:0006950                                                                                                                                                           | metabolic process,response to stress                                                                                                                |                                         | binding,catalytic activity,molecular_function              |
| ug1386     | 495                  | GO:0005739                                                                                                                                                                                                       |                                                                                                                                                     | mitochondrion                           |                                                            |
| ug1387     | 584                  | GO:0005856,GO:0009653,GO:0016043,GO:0009987,GO:0030154,GO:0007275,GO:0005515,GO:0005737                                                                                                                          | anatomical structure morphogenesis,cellular component organization,cellular process,cell differentiation,multicellular organismal development       | cytoskeleton,cytoplasm                  | protein binding                                            |
| ug1388     | 952                  |                                                                                                                                                                                                                  |                                                                                                                                                     |                                         |                                                            |
| ug1389     | 1625                 | GO:0005856,GO:0005737,GO:0000166,GO:0009058,GO:0009987,GO:0003824,GO:0008152,GO:0009536                                                                                                                          | biological_process                                                                                                                                  |                                         | nucleotide binding,protein binding                         |
| ug1390     | 1480                 | GO:0003824,GO:0008152,GO:0009536                                                                                                                                                                                 | biosynthetic process,cellular process,metabolic process                                                                                             | plastid                                 | catalytic activity                                         |
| ug1391     | 1006                 | GO:0005840,GO:0005198,GO:0006412                                                                                                                                                                                 | translation                                                                                                                                         | ribosome                                | structural molecule activity                               |
| ug1392     | 905                  |                                                                                                                                                                                                                  |                                                                                                                                                     |                                         |                                                            |

| Unigene ID | sequence length (bp) | GO-ID                                                                                                                                                                | Biological process                                                                                                                                                           | Cellular component                               | Molecular function                                       |
|------------|----------------------|----------------------------------------------------------------------------------------------------------------------------------------------------------------------|------------------------------------------------------------------------------------------------------------------------------------------------------------------------------|--------------------------------------------------|----------------------------------------------------------|
| ug1393     | 831                  | GO:0005840,GO:0005198,GO:0006412                                                                                                                                     | translation                                                                                                                                                                  | ribosome                                         | structural molecule activity                             |
| ug1394     | 1014                 | GO:0005840,GO:0009536,GO:0003723,GO:0016020,GO:0009579,GO:0019725                                                                                                    | cellular homeostasis                                                                                                                                                         | ribosome,plastid,membrane,thylakoid              | RNA binding,nucleotide binding                           |
| ug1395     | 617                  | GO:0005840,GO:0005198,GO:0006412,GO:0005840,GO:0005198,GO:0006412,GO:0005840,GO:0005198,GO:0006412,GO:0005840,GO:0005198,GO:0006412,GO:0005840,GO:0005198,GO:0006412 | translation                                                                                                                                                                  | ribosome,mitochondrion                           | structural molecule activity                             |
| ug1396     | 697                  | GO:0005840,GO:0005198,GO:0006412,GO:0005840,GO:0005198,GO:0006412,GO:0005840,GO:0005198,GO:0006412,GO:0005840,GO:0005198,GO:0006412                                  | translation                                                                                                                                                                  | ribosome                                         | structural molecule activity,nucleotide binding          |
| ug1397     | 727                  | GO:0005840,GO:0005198,GO:0006412,GO:0005840,GO:0005198,GO:0006412,GO:0005840,GO:0005198,GO:0006412,GO:0005840,GO:0005198,GO:0006412                                  | transport,response to stress,response to abiotic stimulus                                                                                                                    |                                                  | binding,protein binding                                  |
| ug1398     | 633                  | 488,GO:0005515,GO:0006950,GO:0009628                                                                                                                                 |                                                                                                                                                                              |                                                  |                                                          |
| ug1399     | 978                  |                                                                                                                                                                      |                                                                                                                                                                              |                                                  |                                                          |
| ug1400     | 790                  |                                                                                                                                                                      |                                                                                                                                                                              |                                                  |                                                          |
| ug1401     | 611                  |                                                                                                                                                                      |                                                                                                                                                                              |                                                  |                                                          |
| ug1402     | 794                  |                                                                                                                                                                      |                                                                                                                                                                              |                                                  |                                                          |
| ug1403     | 950                  | GO:0005829,GO:0003824,GO:0005488,GO:0006091,GO:0005975,GO:0005515,GO:0006412                                                                                         | generation of precursor metabolites and energy,carbohydrate metabolic process,catabolic process,protein modification                                                         | cytosol                                          | catalytic activity,binding                               |
| ug1404     | 798                  | 464,GO:0009719,GO:0005622,GO:0005488                                                                                                                                 | process,response to endogenous stimulus                                                                                                                                      | intracellular                                    | protein binding,binding                                  |
| ug1405     | 790                  |                                                                                                                                                                      |                                                                                                                                                                              |                                                  |                                                          |
| ug1406_1   | 691                  | GO:0005840,GO:0005198,GO:0006412                                                                                                                                     | translation                                                                                                                                                                  | ribosome                                         | structural molecule activity                             |
| ug1406_2   | 512                  | GO:0019538,GO:0009987,GO:0000166,GO:0006412,GO:0016043,GO:0009987,GO:0000003,GO:0009791,GO:0009790,GO:000813                                                         | protein metabolic process,cellular process,response to stress,translation,cellular component organization,cellular process,reproduction,post-embryonic development,embryonic |                                                  | nucleotide binding                                       |
| ug1407     | 1218                 |                                                                                                                                                                      |                                                                                                                                                                              |                                                  | translation factor activity,nucleic acid binding,binding |
| ug1408     | 713                  |                                                                                                                                                                      |                                                                                                                                                                              |                                                  |                                                          |
| ug1409     | 710                  | GO:0005622,GO:0003677,GO:0016043,GO:0009987,GO:0005634,GO:0016020,GO:0005737,GO:0005773,GO:005783,GO:0016740                                                         | cellular component organization,cellular process                                                                                                                             | intracellular,nucleus                            | DNA binding                                              |
| ug1410     | 769                  | 737,GO:0005773,GO:005783,GO:0016740                                                                                                                                  |                                                                                                                                                                              | membrane,cytoplasm,vacuole,endoplasmic reticulum | transferase activity                                     |
| ug1411     | 1197                 |                                                                                                                                                                      |                                                                                                                                                                              |                                                  |                                                          |
| ug1412     | 760                  | GO:0019538,GO:0009987,GO:0005634,GO:0009987,GO:0005634                                                                                                               | protein metabolic process,catabolic process,cellular process                                                                                                                 |                                                  | protein binding                                          |
| ug1413     | 1078                 | GO:0005840,GO:0005198,GO:0003723,GO:0005840,GO:0005198,GO:0006412                                                                                                    | translation                                                                                                                                                                  | ribosome                                         | structural molecule activity,RNA binding                 |
| ug1414     | 691                  | GO:0005840,GO:0005198,GO:0006412                                                                                                                                     | translation                                                                                                                                                                  | ribosome                                         | structural molecule activity                             |
| ug1415     | 743                  | GO:0005576,GO:0007267,GO:0005618,GO:0005488                                                                                                                          | cell-cell signaling                                                                                                                                                          | extracellular region,cell wall                   | signal transducer activity                               |
| ug1416     | 1242                 | GO:0005488                                                                                                                                                           |                                                                                                                                                                              |                                                  | binding                                                  |
| ug1417     | 988                  | GO:0005886                                                                                                                                                           |                                                                                                                                                                              | plasma membrane                                  |                                                          |
| ug1418     | 720                  |                                                                                                                                                                      |                                                                                                                                                                              |                                                  |                                                          |
| ug1419     | 887                  | GO:0005840,GO:0005198,GO:0006412                                                                                                                                     | translation                                                                                                                                                                  | ribosome                                         | structural molecule activity                             |
| ug1420     | 814                  | GO:0005840,GO:0005198,GO:0009987,GO:0005622,GO:0003677,GO:0016043,GO:0009987,GO:0005634                                                                              | cellular process,translation                                                                                                                                                 | ribosome                                         | structural molecule activity                             |
| ug1421     | 665                  | 677,GO:0016043,GO:0009987,GO:0005634                                                                                                                                 | cellular component organization,cellular process                                                                                                                             | intracellular,nucleus                            | DNA binding                                              |
| ug1422     | 1136                 |                                                                                                                                                                      |                                                                                                                                                                              |                                                  |                                                          |
| ug1423     | 808                  | GO:0008150,GO:0000003,GO:0009628,GO:0009791,GO:0009908,GO:0005634,GO:0007160,GO:0030246,GO:0019538,GO:0009987,GO:0005783,GO:0005488,GO:0005840,GO:0005198,GO:0006412 | biological_process,reproduction,response to abiotic stimulus,post-embryonic development,flower development,signal transduction                                               | nucleus                                          |                                                          |
| ug1424     | 785                  | 538,GO:0009987,GO:0005783,GO:0005488,GO:0005840,GO:0005198,GO:0006412                                                                                                | protein metabolic process,cellular process                                                                                                                                   | endoplasmic reticulum                            | carbohydrate binding,binding,protein binding             |
| ug1425     | 918                  | GO:0005840,GO:0005198,GO:0006412                                                                                                                                     | translation                                                                                                                                                                  | ribosome                                         | structural molecule activity                             |
| ug1426     | 930                  |                                                                                                                                                                      |                                                                                                                                                                              |                                                  |                                                          |
| ug1427     | 1278                 | GO:0008152,GO:0003824,GO:0005488                                                                                                                                     | metabolic process                                                                                                                                                            |                                                  | catalytic activity,binding                               |
| ug1428     | 642                  | GO:0006464                                                                                                                                                           | protein modification process                                                                                                                                                 |                                                  |                                                          |
| ug1429     | 730                  | GO:0005975,GO:0009987,GO:0016301,GO:0005198,GO:0009987,GO:0005840,GO:0005198,GO:0006412,GO:0005739,GO:0016020,GO:0005622                                             | carbohydrate metabolic process,cellular process                                                                                                                              |                                                  | kinase activity                                          |
| ug1430     | 867                  | 987,GO:0005840,GO:0005829,GO:0006412                                                                                                                                 | cellular process,translation                                                                                                                                                 | ribosome,cytosol                                 | structural molecule activity                             |
| ug1431     | 665                  | GO:0005739,GO:0016020,GO:0005622                                                                                                                                     |                                                                                                                                                                              | mitochondrion,membrane,intracellular             |                                                          |
| ug1432     | 598                  |                                                                                                                                                                      |                                                                                                                                                                              | ar                                               |                                                          |

| Unigene ID | sequence length (bp) | GO-ID                                                                                                                                                                                      | Biological process                                                                                               | Cellular component                                   | Molecular function                                         |
|------------|----------------------|--------------------------------------------------------------------------------------------------------------------------------------------------------------------------------------------|------------------------------------------------------------------------------------------------------------------|------------------------------------------------------|------------------------------------------------------------|
| ug1433     | 359                  |                                                                                                                                                                                            |                                                                                                                  |                                                      |                                                            |
| ug1434     | 916                  | GO:0009719,GO:0007165,GO:0016740                                                                                                                                                           | response to endogenous stimulus,signal transduction                                                              |                                                      | transferase activity                                       |
| ug1435_1   | 916                  | GO:0006810,GO:0016020,GO:0005215                                                                                                                                                           | transport                                                                                                        | membrane                                             | transporter activity                                       |
| ug1435_2   | 1054                 | GO:0016740                                                                                                                                                                                 |                                                                                                                  |                                                      | transferase activity                                       |
| ug1436     | 768                  |                                                                                                                                                                                            |                                                                                                                  |                                                      |                                                            |
| ug1437     | 1172                 | GO:0005975,GO:0009987,GO:0016787,GO:0005576,GO:0005618,GO:0005215,GO:0016020,GO:0005739,GO:0006810,GO:0009058,GO:0006091,GO:0006139                                                        | carbohydrate metabolic process,cellular process                                                                  | extracellular region,cell wall                       | hydrolase activity,transferase activity                    |
| ug1438     | 964                  | GO:0006810,GO:0009058,GO:0006091,GO:0006139                                                                                                                                                | metabolites and energy,nucleobase, nucleoside, nucleotide and nucleic acid metabolic process                     | membrane,mitochondrion                               | transporter activity                                       |
| ug1439     | 795                  |                                                                                                                                                                                            |                                                                                                                  |                                                      |                                                            |
| ug1440     | 478                  |                                                                                                                                                                                            |                                                                                                                  |                                                      |                                                            |
| ug1441     | 537                  | GO:0006810,GO:0016020,GO:0005215                                                                                                                                                           | transport                                                                                                        | membrane                                             | transporter activity                                       |
| ug1442     | 513                  |                                                                                                                                                                                            |                                                                                                                  |                                                      |                                                            |
| ug1443     | 751                  | GO:0016043,GO:0007049,GO:0005737,GO:0003824,GO:0005634                                                                                                                                     | cellular component organization,cell cycle                                                                       | cytoplasm,nucleus                                    | catalytic activity                                         |
| ug1444     | 722                  | GO:0005198,GO:0005840,GO:0006412                                                                                                                                                           | translation                                                                                                      | ribosome                                             | structural molecule activity                               |
| ug1445     | 587                  | GO:0019538,GO:0009056,GO:0016787                                                                                                                                                           | protein metabolic process,catabolic process                                                                      |                                                      | hydrolase activity                                         |
| ug1446     | 689                  | GO:0003677,GO:0006350,GO:0005634                                                                                                                                                           | transcription                                                                                                    | nucleus                                              | DNA binding                                                |
| ug1447     | 853                  | GO:0005840,GO:0005198,GO:0006412,GO:0006950,GO:0009056,GO:0016787,GO:0005975,GO:0009056,GO:0009987,GO:003024                                                                               | translation                                                                                                      | ribosome                                             | structural molecule activity,nucleotide binding            |
| ug1448     | 695                  | GO:0003824,GO:0005488,GO:0006810,GO:0003674,GO:0016020,GO:0009536,GO:0009579,GO:0006091,GO:0016043,GO:0009987,GO:0006464,GO:00006                                                          | response to stress,response to biotic stimulus,carbohydrate metabolic process,catabolic process,cellular process |                                                      | hydrolase activity,carbohydrate binding                    |
| ug1449     | 1324                 | GO:0003824,GO:0005488,GO:0006810,GO:0003674,GO:0016020,GO:0009536,GO:0009579,GO:0006091,GO:0016043,GO:0009987,GO:0006464,GO:00006                                                          | transport,generation of precursor metabolites and energy,photosynthesis                                          | membrane,plastid,thylakoid                           | catalytic activity,binding,molecular function              |
| ug1450     | 750                  | GO:0005737,GO:0005515,GO:0005856,GO:0009058,GO:0009987,GO:0005737,GO:0016740,GO:0000166,GO:0006464,GO:00006                                                                                | cellular component organization,cellular process                                                                 | cytoplasm,cytoskeleton                               | protein binding                                            |
| ug1451     | 508                  | GO:0005737,GO:0016740,GO:0000166,GO:0006464,GO:00006                                                                                                                                       | biosynthetic process,cellular process                                                                            | cytoplasm                                            | transferase activity,nucleotide binding,catalytic activity |
| ug1452     | 1558                 | GO:0005488,GO:0003824                                                                                                                                                                      | protein modification process,cellular amino acid and derivative metabolic process                                |                                                      | binding,catalytic activity                                 |
| ug1453     | 507                  |                                                                                                                                                                                            |                                                                                                                  |                                                      |                                                            |
| ug1454     | 1007                 | GO:0000166,GO:0005794,GO:0006810,GO:0009987,GO:0006464,GO:0009536,GO:000716                                                                                                                | transport,cellular process,protein modification process,signal transduction                                      | Golgi apparatus,plastid                              | nucleotide binding,transporter activity                    |
| ug1455     | 990                  |                                                                                                                                                                                            |                                                                                                                  |                                                      |                                                            |
| ug1456     | 1226                 | GO:0005773                                                                                                                                                                                 |                                                                                                                  | vacuole                                              |                                                            |
| ug1457     | 561                  | GO:0005840,GO:0005198,GO:0006412                                                                                                                                                           | translation                                                                                                      | ribosome                                             | structural molecule activity                               |
| ug1458     | 593                  |                                                                                                                                                                                            |                                                                                                                  |                                                      |                                                            |
| ug1459_1   | 1006                 | GO:0016043,GO:0009987,GO:0005737,GO:0005515,GO:0005856                                                                                                                                     | cellular component organization,cellular process                                                                 | cytoplasm,cytoskeleton                               | protein binding                                            |
| ug1459_2   | 607                  |                                                                                                                                                                                            |                                                                                                                  |                                                      |                                                            |
| ug1460     | 835                  | GO:0016020,GO:0005198,GO:0019538,GO:0009987,GO:0000166,GO:0003824,GO:0005488,GO:0008152,GO:0009536,GO:0005576,GO:0005737,GO:0005739,GO:0009056,GO:0009058,GO:0009987,GO:0006464,GO:0003824 | protein metabolic process,cellular process                                                                       | membrane,endoplasmic reticulum                       | nucleotide binding                                         |
| ug1461     | 519                  | GO:0000166,GO:0003824,GO:0005488,GO:0008152,GO:0009536,GO:0005576,GO:0005737,GO:0005739,GO:0009056,GO:0009058,GO:0009987,GO:0006464,GO:0003824                                             | metabolic process,catabolic process,cellular amino acid and derivative metabolic process                         | plastid,extracellular region,cytoplasm,mitochondrion | catalytic activity,binding                                 |
| ug1462     | 1266                 | GO:0005737,GO:0005739,GO:0009056,GO:0009058,GO:0009987,GO:0006464,GO:0003824                                                                                                               | biosynthetic process,cellular process                                                                            | membrane,mitochondrion,intracellular                 |                                                            |
| ug1463     | 605                  | GO:0016020,GO:0005739,GO:0005622,GO:0019538,GO:0009056,GO:0009987,GO:0006464,GO:0003824                                                                                                    | protein metabolic process,catabolic process,cellular process,protein modification process                        |                                                      | catalytic activity                                         |
| ug1464     | 905                  | GO:0005776,GO:0016043,GO:0009987,GO:00006                                                                                                                                                  | cellular component organization,cellular process                                                                 | extracellular region,membrane                        |                                                            |
| ug1465     | 617                  | GO:0005776,GO:0016043,GO:0009987,GO:00006                                                                                                                                                  |                                                                                                                  |                                                      |                                                            |

| Unigene ID | sequence length (bp) | GO-ID                                                                                   | Biological process                                                                                                                                                        | Cellular component                  | Molecular function                               |
|------------|----------------------|-----------------------------------------------------------------------------------------|---------------------------------------------------------------------------------------------------------------------------------------------------------------------------|-------------------------------------|--------------------------------------------------|
| ug1466     | 808                  | GO:0016740,GO:0003824,GO:0006091,GO:015979,GO:0009536,GO:0009058,GO:000998              | generation of precursor metabolites and energy,photosynthesis,biosynthetic process,cellular process                                                                       | plastid                             | transferase activity,catalytic activity          |
| ug1467     | 406                  | GO:0005739,GO:0006091                                                                   | generation of precursor metabolites and energy                                                                                                                            | mitochondrion                       |                                                  |
| ug1468     | 716                  |                                                                                         |                                                                                                                                                                           |                                     |                                                  |
| ug1469     | 722                  |                                                                                         |                                                                                                                                                                           |                                     |                                                  |
| ug1470     | 845                  | GO:0005515,GO:0005                                                                      |                                                                                                                                                                           | intracellular                       | protein binding                                  |
| ug1471     | 782                  | GO:0016740,GO:0006350,GO:0005622,GO:0                                                   | transcription                                                                                                                                                             | intracellular                       | transferase activity,DNA binding                 |
| ug1472     | 715                  |                                                                                         |                                                                                                                                                                           |                                     |                                                  |
| ug1473     | 928                  | GO:0006950,GO:0008150,GO:0003824,GO:0008152,GO:0009536,GO:0005829,GO:000573             | response to stress,biological_process,metabolic process,response to abiotic stimulus                                                                                      | plastid,cytosol,mitochondrion       | catalytic activity                               |
| ug1474     | 685                  | GO:0005829,GO:0003824,GO:0005488,GO:0006091,GO:0005975,GO:0016020,GO:0005               | generation of precursor metabolites and energy,carbohydrate metabolic process,catabolic process                                                                           | cytosol                             | catalytic activity,binding                       |
| ug1475     | 997                  | GO:0009536,GO:0005979,GO:0005198,GO:0009                                                | photosynthesis                                                                                                                                                            | membrane,plastid,thylakoid          | binding                                          |
| ug1476     | 708                  | GO:0005840,GO:0005829,GO:0005488,GO:0006412,GO:000372                                   | cellular process,translation                                                                                                                                              | ribosome,cytosol                    | structural molecule activity,binding,RNA binding |
| ug1477     | 762                  |                                                                                         |                                                                                                                                                                           |                                     |                                                  |
| ug1478     | 636                  | GO:0006950,GO:0009607                                                                   | response to stress,response to biotic stimulus                                                                                                                            |                                     |                                                  |
| ug1479     | 778                  | GO:0006810,GO:0005886,GO:0008289                                                        | transport                                                                                                                                                                 | plasma membrane                     | lipid binding                                    |
| ug1480     | 943                  | GO:0003676                                                                              |                                                                                                                                                                           |                                     | nucleic acid binding                             |
| ug1481     | 812                  | GO:0009607,GO:0006950                                                                   | response to biotic stimulus,response to stress                                                                                                                            |                                     |                                                  |
| ug1482     | 1426                 | GO:0016740                                                                              |                                                                                                                                                                           |                                     | transferase activity                             |
| ug1483_1   | 717                  | GO:0005634,GO:0000166,GO:0003723                                                        |                                                                                                                                                                           | nucleus                             | nucleotide binding,RNA binding                   |
| ug1483_2   | 745                  |                                                                                         |                                                                                                                                                                           |                                     |                                                  |
| ug1484     | 867                  | GO:0005737,GO:0005                                                                      |                                                                                                                                                                           | cytoplasm                           | binding                                          |
| ug1485     | 772                  | GO:0019725,GO:0003                                                                      | cellular homeostasis                                                                                                                                                      |                                     | catalytic activity                               |
| ug1486_1   | 883                  | GO:0005840,GO:0005198,GO:0006412                                                        | translation                                                                                                                                                               | ribosome                            | structural molecule activity                     |
| ug1486_2   | 662                  | GO:0005840,GO:0005198,GO:0006412                                                        | translation                                                                                                                                                               | ribosome                            | structural molecule activity                     |
| ug1487     | 767                  | GO:0005488                                                                              |                                                                                                                                                                           |                                     | binding                                          |
| ug1488     | 990                  | GO:0016787                                                                              |                                                                                                                                                                           |                                     | hydrolase activity                               |
| ug1489     | 951                  | GO:0005576,GO:0005488,GO:0003674                                                        |                                                                                                                                                                           | extracellular region                | binding,molecular_function                       |
| ug1490     | 802                  | GO:0005840,GO:0006464,GO:0005198,GO:0006091,GO:0015                                     | protein modification process,translation                                                                                                                                  | ribosome                            | structural molecule activity                     |
| ug1491     | 897                  | GO:0009536,GO:0016020,GO:0009579,GO:0006464,GO:0005488,GO:000953                        | generation of precursor metabolites and energy,photosynthesis,protein modification process                                                                                | membrane,thylakoid,plastid          | binding                                          |
| ug1492     | 1176                 |                                                                                         |                                                                                                                                                                           |                                     |                                                  |
| ug1493     | 244                  |                                                                                         |                                                                                                                                                                           |                                     |                                                  |
| ug1494     | 801                  | GO:0016020,GO:0005783,GO:0005623,GO:0005488,GO:0006810,GO:0005576,GO:0006               | transport,generation of precursor metabolites and energy                                                                                                                  | membrane,endoplasmic reticulum,cell | binding                                          |
| ug1495     | 1035                 | GO:0005576,GO:0006950,GO:0005618                                                        | response to stress                                                                                                                                                        | extracellular region,cell wall      |                                                  |
| ug1496     | 1382                 | GO:0008152,GO:0009987,GO:0005488,GO:00019538,GO:0009                                    | metabolic process,cellular process                                                                                                                                        |                                     | binding,catalytic activity                       |
| ug1497     | 920                  | GO:0005515,GO:0001000166,GO:0006950                                                     | protein metabolic process,cellular process,response to stress                                                                                                             |                                     | protein binding,nucleotide binding               |
| ug1498     | 420                  |                                                                                         |                                                                                                                                                                           |                                     |                                                  |
| ug1499     | 912                  | GO:0016301,GO:0009605,GO:0007165,GO:0009628,GO:0009058,GO:0006139,GO:0000166,GO:0005488 | response to external stimulus,signal transduction,response to abiotic stimulus,biosynthetic process,nucleobase, nucleoside, nucleotide and nucleic acid metabolic process |                                     | kinase activity,nucleotide binding,binding       |
| ug1500     | 726                  | GO:0006091,GO:0005488,GO:0003674                                                        | generation of precursor metabolites and energy                                                                                                                            |                                     | binding,molecular_function                       |
| ug1501     | 933                  | GO:0019538,GO:0009987,GO:0005515,GO:0006950,GO:0005488,G                                | protein metabolic process,cellular process,response to stress                                                                                                             | plasma membrane                     | protein binding,binding                          |
| ug1502     | 1011                 |                                                                                         |                                                                                                                                                                           |                                     |                                                  |
| ug1503     | 797                  |                                                                                         |                                                                                                                                                                           |                                     |                                                  |

| Unigene ID | sequence length (bp) | GO-ID                                                                                                                                          | Biological process                                                                                                                                                                       | Cellular component         | Molecular function                                         |
|------------|----------------------|------------------------------------------------------------------------------------------------------------------------------------------------|------------------------------------------------------------------------------------------------------------------------------------------------------------------------------------------|----------------------------|------------------------------------------------------------|
| ug1504     | 650                  | GO:0005488                                                                                                                                     |                                                                                                                                                                                          |                            | binding                                                    |
| ug1505     | 914                  |                                                                                                                                                |                                                                                                                                                                                          |                            |                                                            |
| ug1506     | 607                  | GO:0005623                                                                                                                                     |                                                                                                                                                                                          | cell                       |                                                            |
| ug1507     | 879                  |                                                                                                                                                |                                                                                                                                                                                          |                            |                                                            |
| ug1508     | 573                  | GO:0016020,GO:0009                                                                                                                             |                                                                                                                                                                                          | membrane,plastid           |                                                            |
| ug1509     | 858                  | GO:0003824,GO:0005488,GO:0008152                                                                                                               | metabolic process                                                                                                                                                                        |                            | catalytic activity,binding                                 |
| ug1510     | 908                  | GO:0006464,GO:0019538,GO:0009056,GO:009987,GO:0003824,GO:0005737,GO:0006810,GO:0008152,GO:005215,GO:0006950,GO:0005488,GO:000563               | protein modification<br>process,protein metabolic process,catabolic process,cellular                                                                                                     |                            | catalytic activity                                         |
| ug1511     | 1083                 | 810,GO:0008152,GO:005215,GO:0006950,GO:0005488,GO:000563                                                                                       | transport,metabolic process,response to stress                                                                                                                                           | cytoplasm,nucleus          | transporter activity,binding,oxygen binding                |
| ug1512     | 868                  |                                                                                                                                                |                                                                                                                                                                                          |                            |                                                            |
| ug1513     | 812                  | GO:0005488,GO:0003                                                                                                                             |                                                                                                                                                                                          |                            | binding,molecular_function                                 |
| ug1514     | 921                  | GO:0008152,GO:0009987,GO:0005488,GO:0                                                                                                          | metabolic process,cellular process                                                                                                                                                       |                            | binding,catalytic activity                                 |
| ug1515     | 1171                 | GO:0016740                                                                                                                                     |                                                                                                                                                                                          |                            | transferase activity                                       |
| ug1516     | 1216                 | GO:0016740,GO:0016020,GO:0009058,GO:009987,GO:0006629,GO:0009058,GO:0006519,GO:0019748,GO:0008152,GO:0003824,GO:0005488                        | biosynthetic process,cellular process,lipid metabolic process<br>biosynthetic process,cellular amino acid and derivative metabolic process,secondary metabolic process,metabolic process | membrane                   | transferase activity                                       |
| ug1517     | 876                  |                                                                                                                                                |                                                                                                                                                                                          |                            | catalytic activity,binding                                 |
| ug1518     | 795                  |                                                                                                                                                |                                                                                                                                                                                          |                            |                                                            |
| ug1519     | 771                  | GO:0005622,GO:0003677,GO:0016043,GO:009987,GO:0005634,GO:0009719,GO:0007165,GO:0016740                                                         | cellular component organization,cellular process<br>response to endogenous stimulus,signal transduction                                                                                  | intracellular,nucleus      | DNA binding                                                |
| ug1520     | 1140                 |                                                                                                                                                |                                                                                                                                                                                          |                            | transferase activity                                       |
| ug1521     | 704                  |                                                                                                                                                |                                                                                                                                                                                          |                            |                                                            |
| ug1522     | 683                  | GO:0005739,GO:0006950,GO:0016020                                                                                                               | response to stress                                                                                                                                                                       | mitochondrion,membrane     |                                                            |
| ug1523     | 944                  |                                                                                                                                                |                                                                                                                                                                                          |                            |                                                            |
| ug1524     | 609                  |                                                                                                                                                |                                                                                                                                                                                          |                            |                                                            |
| ug1525     | 893                  |                                                                                                                                                |                                                                                                                                                                                          |                            |                                                            |
| ug1526     | 946                  |                                                                                                                                                |                                                                                                                                                                                          |                            |                                                            |
| ug1527_1   | 635                  | GO:0019725,GO:0005829,GO:0008152,GO:009987,GO:0003674,GO:0003824,GO:0005                                                                       | cellular homeostasis,metabolic process,cellular process                                                                                                                                  | cytosol                    | molecular_function,catalytic activity                      |
| ug1527_2   | 1003                 | 886,GO:0000166,GO:0008152,GO:0006350                                                                                                           | metabolic process,transcription                                                                                                                                                          | plasma membrane            | catalytic activity,nucleotide binding                      |
| ug1528     | 640                  |                                                                                                                                                |                                                                                                                                                                                          |                            |                                                            |
| ug1529     | 694                  | GO:0006091,GO:0015979,GO:0016020,GO:009579,GO:0005488,GO:0006464,GO:000953                                                                     | generation of precursor metabolites and energy,photosynthesis,protein modification process                                                                                               | membrane,thylakoid,plastid | binding                                                    |
| ug1530     | 785                  | GO:0016787                                                                                                                                     |                                                                                                                                                                                          |                            | hydrolase activity                                         |
| ug1531_1   | 768                  | GO:0006950,GO:0005                                                                                                                             | response to stress                                                                                                                                                                       | vacuole                    |                                                            |
| ug1531_2   | 711                  | GO:0006464                                                                                                                                     | protein modification process                                                                                                                                                             |                            |                                                            |
| ug1532     | 881                  | GO:0016787                                                                                                                                     |                                                                                                                                                                                          |                            | hydrolase activity                                         |
| ug1533     | 540                  | GO:0005623,GO:0016020,GO:0006950,GO:0000166,GO:0016787,GO:0006810,GO:009987,GO:0009536,GO:0007165,GO:000521                                    | response to stress,response to abiotic stimulus<br>transport,cellular process,signal transduction                                                                                        | cell,membrane              |                                                            |
| ug1534     | 1214                 |                                                                                                                                                |                                                                                                                                                                                          | plastid                    | nucleotide binding,hydrolase activity,transporter activity |
| ug1535     | 678                  |                                                                                                                                                |                                                                                                                                                                                          |                            |                                                            |
| ug1536     | 636                  | GO:0005737                                                                                                                                     |                                                                                                                                                                                          | cytoplasm                  |                                                            |
| ug1537_1   | 392                  | GO:0005623,GO:0016020,GO:0006950,GO:0                                                                                                          | response to stress,response to abiotic stimulus                                                                                                                                          | cell,membrane              |                                                            |
| ug1537_2   | 752                  |                                                                                                                                                |                                                                                                                                                                                          |                            |                                                            |
| ug1538     | 510                  |                                                                                                                                                |                                                                                                                                                                                          |                            |                                                            |
| ug1539     | 655                  | GO:0015979,GO:0016020,GO:0009579                                                                                                               | photosynthesis                                                                                                                                                                           | membrane,thylakoid         |                                                            |
| ug1540     | 898                  | GO:0005488                                                                                                                                     |                                                                                                                                                                                          |                            | binding                                                    |
| ug1541     | 1008                 | GO:0003824,GO:0005829,GO:0009536,GO:0009058,GO:0006519,GO:0006950,GO:0009620,GO:0005840,GO:0006464,GO:0005198,GO:0006810,GO:0005886,GO:0008289 | biosynthetic process,cellular amino acid and derivative metabolic process,response to stress,response to abiotic stimulus<br>protein modification process,translation<br>transport       | cytosol,plastid            | catalytic activity                                         |
| ug1542     | 675                  |                                                                                                                                                |                                                                                                                                                                                          | ribosome                   | structural molecule activity                               |
| ug1543     | 860                  |                                                                                                                                                |                                                                                                                                                                                          | plasma membrane            | lipid binding                                              |
| ug1544     | 925                  |                                                                                                                                                |                                                                                                                                                                                          |                            |                                                            |
| ug1545     | 537                  | GO:0006950                                                                                                                                     | response to stress                                                                                                                                                                       |                            |                                                            |



| Unigene ID | sequence length (bp) | GO-ID                                                                          | Biological process                                                                                                | Cellular component                  | Molecular function                                                                                 |
|------------|----------------------|--------------------------------------------------------------------------------|-------------------------------------------------------------------------------------------------------------------|-------------------------------------|----------------------------------------------------------------------------------------------------|
| ug1546     | 827                  | GO:0016020,GO:0005783,GO:0005623,GO:0005488,GO:0006810,G                       | transport,generation of precursor metabolites and energy                                                          | membrane,endoplasmic reticulum,cell | binding                                                                                            |
| ug1547     | 1108                 | GO:0005515                                                                     |                                                                                                                   |                                     | protein binding                                                                                    |
| ug1548     | 1226                 |                                                                                |                                                                                                                   |                                     |                                                                                                    |
| ug1549     | 670                  |                                                                                |                                                                                                                   |                                     |                                                                                                    |
| ug1550     | 780                  |                                                                                |                                                                                                                   |                                     |                                                                                                    |
| ug1551     | 1005                 |                                                                                |                                                                                                                   |                                     |                                                                                                    |
| ug1552     | 855                  |                                                                                |                                                                                                                   |                                     |                                                                                                    |
| ug1553     | 493                  | GO:0005488,GO:0008152,GO:0009987,GO:00016787,GO:0016                           | metabolic process,cellular process                                                                                |                                     | binding,catalytic activity                                                                         |
| ug1554     | 1158                 | 043,GO:0009987,GO:0005618,GO:0030234                                           | cellular component organization,cellular process                                                                  | cell wall                           | hydrolase activity,enzyme regulator activity                                                       |
| ug1555     | 749                  | GO:0005515,GO:0006464,GO:0009719,GO:0005622,GO:0005488                         | protein modification process,response to endogenous stimulus                                                      | intracellular                       | protein binding,binding                                                                            |
| ug1556     | 942                  | GO:0005840,GO:0005198,GO:0006412                                               | translation                                                                                                       | ribosome                            | structural molecule activity                                                                       |
| ug1557_1   | 586                  | GO:0005840,GO:0005198,GO:0005488,GO:0006412,GO:0005739                         | translation                                                                                                       | ribosome,mitochondrion              | structural molecule activity,binding                                                               |
| ug1557_2   | 1101                 |                                                                                |                                                                                                                   |                                     |                                                                                                    |
| ug1558     | 941                  | GO:0009058,GO:0006519,GO:0019748,GO:0003824                                    | biosynthetic process,cellular amino acid and derivative metabolic process,secondary metabolic                     |                                     | catalytic activity                                                                                 |
| ug1559     | 734                  | GO:0016020,GO:0009579,GO:0009536,GO:0005488,GO:0008                            | photosynthesis                                                                                                    | membrane,thylakoid,plastid          |                                                                                                    |
| ug1560_1   | 802                  | GO:0005737,GO:0009987,GO:0003824,G                                             | metabolic process,cellular process                                                                                | cytoplasm                           | binding,catalytic activity,molecular_function                                                      |
| ug1560_2   | 835                  | GO:0019538,GO:0003824,GO:0006464                                               | protein metabolic process,protein modification process                                                            |                                     | catalytic activity                                                                                 |
| ug1561     | 868                  | GO:0005737                                                                     |                                                                                                                   | cytoplasm                           |                                                                                                    |
| ug1562     | 825                  |                                                                                |                                                                                                                   |                                     |                                                                                                    |
| ug1563     | 843                  | GO:0009058,GO:0006519,GO:0005488,GO:0                                          | biosynthetic process,cellular amino acid and derivative metabolic                                                 |                                     | binding,transferase activity                                                                       |
| ug1564     | 433                  |                                                                                |                                                                                                                   |                                     |                                                                                                    |
| ug1565     | 494                  | GO:0005623,GO:0005488,GO:0008152,GO:0005737,GO:0003824,G                       | metabolic process,response to stress                                                                              | cell,cytoplasm                      | binding,catalytic activity,molecular_function                                                      |
| ug1566     | 1300                 |                                                                                |                                                                                                                   |                                     |                                                                                                    |
| ug1567_1   | 589                  | GO:0005737,GO:0000166,GO:0008152,GO:0005975,GO:0006091,G                       | metabolic process,carbohydrate metabolic process,generation of precursor metabolites and energy,catabolic process | cytoplasm                           | nucleotide binding,catalytic activity                                                              |
| ug1567_2   | 552                  | GO:0006810,GO:0016020,GO:0005215                                               | transport                                                                                                         | membrane                            | transporter activity                                                                               |
| ug1568     | 1427                 | GO:0016740,GO:0009058,GO:0006519,GO:0019748                                    | biosynthetic process,cellular amino acid and derivative metabolic process,secondary metabolic                     |                                     | transferase activity                                                                               |
| ug1569     | 953                  |                                                                                |                                                                                                                   |                                     |                                                                                                    |
| ug1570     | 729                  | GO:0005840,GO:0005198,GO:0006412                                               | translation                                                                                                       | ribosome                            | structural molecule activity                                                                       |
| ug1571     | 783                  | GO:0005515                                                                     |                                                                                                                   |                                     | protein binding                                                                                    |
| ug1572_1   | 722                  |                                                                                |                                                                                                                   |                                     |                                                                                                    |
| ug1572_2   | 947                  | GO:0008150                                                                     | biological_process                                                                                                |                                     |                                                                                                    |
| ug1573     | 578                  | GO:0003824,GO:0008152,GO:0005618,GO:0005488,GO:0016                            | metabolic process                                                                                                 | cell wall                           | catalytic activity,nucleotide binding                                                              |
| ug1574     | 1259                 | GO:0006091,GO:00015979,GO:0009536,G                                            | generation of precursor metabolites and energy,photosynthesis                                                     | membrane,plastid,thylakoid          | binding                                                                                            |
| ug1575     | 943                  |                                                                                |                                                                                                                   |                                     |                                                                                                    |
| ug1576     | 1094                 | GO:0006464                                                                     | protein modification process                                                                                      |                                     |                                                                                                    |
| ug1577     | 1116                 | GO:0005488,GO:0003824,GO:0006350,GO:0009719,GO:0007165,GO:0030528,GO:0005515,G | transcription,response to endogenous stimulus,signal transduction                                                 | nucleus                             | binding,DNA binding transcription regulator activity,protein binding,transcription factor activity |
| ug1578     | 930                  | GO:0003700,GO:000563                                                           |                                                                                                                   |                                     |                                                                                                    |
| ug1579     | 837                  |                                                                                |                                                                                                                   |                                     |                                                                                                    |
| ug1580     | 1151                 |                                                                                |                                                                                                                   |                                     |                                                                                                    |
| ug1581     | 1020                 | GO:0009058,GO:0006519,GO:0019748,GO:0003824                                    | biosynthetic process,cellular amino acid and derivative metabolic process,secondary metabolic                     |                                     | catalytic activity                                                                                 |
| ug1582     | 982                  | GO:0005975,GO:0016787,GO:0016740                                               | carbohydrate metabolic process                                                                                    |                                     | hydrolase activity,transferase activity                                                            |
| ug1583_1   | 505                  |                                                                                |                                                                                                                   |                                     |                                                                                                    |
| ug1583_2   | 642                  | GO:0009607,GO:0009605,GO:0006950,GO:0                                          | response to biotic stimulus,response to external                                                                  | plastid                             |                                                                                                    |

| Unigene ID | sequence length (bp) | GO-ID                                                                                                                                                                           | Biological process                                                                                                          | Cellular component                             | Molecular function                                                 |
|------------|----------------------|---------------------------------------------------------------------------------------------------------------------------------------------------------------------------------|-----------------------------------------------------------------------------------------------------------------------------|------------------------------------------------|--------------------------------------------------------------------|
| ug1584     | 762                  | GO:0005840,GO:0005198,GO:0006412                                                                                                                                                | translation                                                                                                                 | ribosome                                       | structural molecule activity                                       |
| ug1585     | 504                  | GO:0005737,GO:0005198,GO:0009987,GO:000166,GO:0005856,GO:0016043,GO:0006950,GO:0009628,GO:0016020,GO:0009579,GO:0009536                                                         | cellular process,cellular component organization,response to stress,response to abiotic stimulus                            | cytoplasm,cytoskeleton                         | structural molecule activity,nucleotide binding,hydrolase activity |
| ug1586     | 814                  | GO:0003824,GO:0005215,GO:0006091,GO:0005622,GO:0003677,GO:0016043,GO:0009987,GO:0005634                                                                                         | generation of precursor metabolites and energy,photosynthesis                                                               | membrane,thylakoid,plastid                     |                                                                    |
| ug1587     | 953                  | GO:0003824,GO:0005215,GO:0006091,GO:0005622,GO:0003677,GO:0016043,GO:0009987,GO:0005634                                                                                         | generation of precursor metabolites and energy                                                                              | mitochondrion                                  | catalytic activity,transporter activity                            |
| ug1588     | 855                  | GO:0003824,GO:0005215,GO:0006091,GO:0005622,GO:0003677,GO:0016043,GO:0009987,GO:0005634                                                                                         | cellular component organization,cellular process                                                                            | intracellular,nucleus                          | DNA binding                                                        |
| ug1589     | 656                  | GO:0005737                                                                                                                                                                      |                                                                                                                             | cytoplasm                                      |                                                                    |
| ug1590     | 836                  | GO:0019538,GO:0009802,GO:0009987,GO:0006464,GO:0003824,GO:0005737,GO:0016043,GO:0009987,GO:0005634                                                                              | protein metabolic process,catabolic process,cellular process,protein modification process                                   |                                                | catalytic activity                                                 |
| ug1591     | 802                  | GO:0005737,GO:0016043,GO:0009987,GO:0005634                                                                                                                                     | protein metabolic process,catabolic process                                                                                 | cytoplasm,plastid                              | hydrolase activity                                                 |
| ug1592     | 444                  | 787,GO:0019538,GO:0009056,GO:0009536                                                                                                                                            | protein metabolic process,catabolic process                                                                                 | cytoplasm,plastid                              | hydrolase activity                                                 |
| ug1593     | 468                  |                                                                                                                                                                                 |                                                                                                                             |                                                |                                                                    |
| ug1594     | 828                  |                                                                                                                                                                                 |                                                                                                                             |                                                |                                                                    |
| ug1595     | 1443                 | GO:0005622,GO:0005886,GO:0019538,GO:0009056,GO:0009987,GO:0005634,GO:000582                                                                                                     | protein metabolic process,catabolic process,cellular process                                                                | intracellular,plasma membrane,nucleus,cytosol  | hydrolase activity                                                 |
| ug1596     | 1043                 | GO:0016020,GO:0008464                                                                                                                                                           | cell death                                                                                                                  | membrane                                       |                                                                    |
| ug1597     | 464                  |                                                                                                                                                                                 |                                                                                                                             |                                                |                                                                    |
| ug1598     | 1572                 | GO:0006350,GO:0003641                                                                                                                                                           | transcription                                                                                                               |                                                | transcription factor activity                                      |
| ug1599     | 641                  |                                                                                                                                                                                 |                                                                                                                             |                                                |                                                                    |
| ug1600     | 949                  | GO:0005730,GO:0005737,GO:0000166,GO:0005886,GO:000515,GO:0007165,GO:001678,GO:0005840,GO:0005198,GO:0009987,GO:0006412,GO:0003723,GO:0016020,GO:000953                          | signal transduction                                                                                                         | nucleolus,cytoplasm,plasma membrane            | nucleotide binding,protein binding,hydrolase activity              |
| ug1601_1   | 1100                 | GO:0005730,GO:0005737,GO:0000166,GO:0005886,GO:000515,GO:0007165,GO:001678,GO:0005840,GO:0005198,GO:0009987,GO:0006412,GO:0003723,GO:0016020,GO:000953                          | cellular process,translation                                                                                                | ribosome,membrane,plastid,thylakoid            | structural molecule activity,RNA binding                           |
| ug1601_2   | 1018                 |                                                                                                                                                                                 |                                                                                                                             |                                                |                                                                    |
| ug1602     | 697                  | GO:0006810                                                                                                                                                                      | transport                                                                                                                   |                                                |                                                                    |
| ug1603     | 828                  | GO:0005840,GO:0005198,GO:0006412                                                                                                                                                | translation                                                                                                                 | ribosome                                       | structural molecule activity                                       |
| ug1604_1   | 657                  | GO:0005840,GO:0005198,GO:0006412                                                                                                                                                | translation                                                                                                                 | ribosome                                       | structural molecule activity                                       |
| ug1604_2   | 460                  |                                                                                                                                                                                 |                                                                                                                             |                                                |                                                                    |
| ug1605     | 731                  | GO:0000166                                                                                                                                                                      |                                                                                                                             |                                                | nucleotide binding                                                 |
| ug1606     | 1430                 | GO:0003677,GO:000005622,GO:0003677,GO:000005622,GO:0003677,GO:000005622,GO:0003677,GO:000005622                                                                                 | cellular component organization,cellular process                                                                            | intracellular,nucleus,cytoskeleton             | DNA binding,protein binding                                        |
| ug1607     | 479                  | GO:0005634,GO:000585                                                                                                                                                            |                                                                                                                             |                                                | binding                                                            |
| ug1608     | 522                  | GO:0005488                                                                                                                                                                      |                                                                                                                             |                                                |                                                                    |
| ug1609     | 1061                 | GO:0016020,GO:0005783,GO:0005886,GO:0016787,GO:0006950,GO:0008219,GO:0005773,GO:0005975,GO:0009056,GO:0009607,GO:0009987,GO:0005618,GO:0030246,GO:0005840,GO:0005198,GO:0006412 | response to stress,cell death,carbohydrate metabolic process,catabolic process,response to biotic stimulus,cellular process | membrane,endoplasmic reticulum,plasma membrane | hydrolase activity,carbohydrate binding                            |
| ug1610     | 1122                 | GO:0005840,GO:0005198,GO:0006412                                                                                                                                                | translation                                                                                                                 | ribosome                                       | structural molecule activity                                       |
| ug1611     | 858                  | GO:0005840,GO:0005198,GO:0006412                                                                                                                                                | translation                                                                                                                 | ribosome                                       | structural molecule activity                                       |
| ug1612     | 770                  |                                                                                                                                                                                 |                                                                                                                             |                                                |                                                                    |
| ug1613     | 1107                 | GO:0006810,GO:0016020,GO:0005215,GO:0000166,GO:0016787,GO:0006810,GO:0009987,GO:0009536,GO:0007165,GO:000521                                                                    | transport,cellular process,signal transduction                                                                              | membrane                                       | transporter activity                                               |
| ug1614     | 1057                 | GO:0006810,GO:0016020,GO:0005215,GO:0000166,GO:0016787,GO:0006810,GO:0009987,GO:0009536,GO:0007165,GO:000521                                                                    | transport,cellular process,signal transduction                                                                              | plastid                                        | nucleotide binding,hydrolase activity,transporter activity         |
| ug1615     | 498                  |                                                                                                                                                                                 |                                                                                                                             |                                                |                                                                    |
| ug1616     | 1038                 |                                                                                                                                                                                 |                                                                                                                             |                                                |                                                                    |
| ug1617_1   | 647                  |                                                                                                                                                                                 |                                                                                                                             |                                                |                                                                    |
| ug1617_2   | 894                  | GO:0005198,GO:0005840,GO:0006412,GO:0006810,GO:0016020,GO:0005215                                                                                                               | translation                                                                                                                 | ribosome                                       | structural molecule activity,RNA binding                           |
| ug1618     | 499                  | GO:0006810,GO:0016020,GO:0005215                                                                                                                                                | transport                                                                                                                   | membrane                                       | transporter activity                                               |

| Unigene ID | sequence length (bp) | GO-ID                                                                                                                               | Biological process                                                                                                                                      | Cellular component                                | Molecular function                                           |
|------------|----------------------|-------------------------------------------------------------------------------------------------------------------------------------|---------------------------------------------------------------------------------------------------------------------------------------------------------|---------------------------------------------------|--------------------------------------------------------------|
| ug1619     | 968                  | GO:0000166,GO:0005737,GO:0007165,GO:0                                                                                               | signal transduction,transport                                                                                                                           | cytoplasm                                         | nucleotide binding                                           |
| ug1620     | 983                  | GO:0006810,GO:0009                                                                                                                  | transport,cellular process                                                                                                                              |                                                   |                                                              |
| ug1621     | 733                  | GO:0005840,GO:0005198,GO:0006412                                                                                                    | translation                                                                                                                                             | ribosome                                          | structural molecule activity                                 |
| ug1622     | 581                  | GO:0005730,GO:0005198,GO:0005840,GO:0005829,GO:0006412,GO:0005737,GO:0008                                                           | translation                                                                                                                                             | nucleolus,ribosome,cytosol,mitochondrion          | structural molecule activity                                 |
| ug1623     | 665                  | GO:0000166,GO:0006412,GO:0016787,GO:0005515,GO:0005                                                                                 | translation                                                                                                                                             | cytoplasm                                         | translation factor activity, nucleic acid binding,nucleotide |
| ug1624     | 798                  | GO:0016020,GO:0009536,GO:0005622,GO:0005739,GO:000681                                                                               | transport                                                                                                                                               | membrane,plastid,intracellular,mitochondrion      | protein binding,transporter activity                         |
| ug1625     | 593                  |                                                                                                                                     |                                                                                                                                                         |                                                   |                                                              |
| ug1626     | 573                  |                                                                                                                                     |                                                                                                                                                         |                                                   |                                                              |
| ug1627     | 977                  | GO:0005576,GO:0005488,GO:0003674                                                                                                    |                                                                                                                                                         | extracellular region                              | binding,molecular_function                                   |
| ug1628     | 985                  |                                                                                                                                     |                                                                                                                                                         |                                                   |                                                              |
| ug1629     | 1075                 | GO:0003824,GO:0005618,GO:0016043,GO:0009987,GO:0005794,GO:0008152,GO:0005886,GO:0009058,GO:0005975,GO:0016740,GO:                   | cellular component organization,cellular process,metabolic process,biosynthetic process,carbohydrate metabolic process,photosynthesis                   | cell wall,Golgi apparatus,plasma membrane,plastid | catalytic activity,transferase activity                      |
| ug1630     | 522                  |                                                                                                                                     |                                                                                                                                                         |                                                   |                                                              |
| ug1631_1   | 864                  | GO:0009579,GO:0016020,GO:0009536,GO:0005829,GO:0003824,GO:0005488,GO:0005975,GO:0006091,GO:0009056                                  | photosynthesis carbohydrate metabolic process,generation of precursor metabolites and energy,catabolic process                                          | thylakoid,membrane,plastid cytosol                | catalytic activity,binding                                   |
| ug1631_2   | 772                  | GO:0008150                                                                                                                          | biological_process                                                                                                                                      |                                                   |                                                              |
| ug1632_1   | 1154                 |                                                                                                                                     |                                                                                                                                                         |                                                   |                                                              |
| ug1632_2   | 571                  |                                                                                                                                     |                                                                                                                                                         |                                                   |                                                              |
| ug1633     | 887                  | GO:0019538,GO:0009987,GO:0003824                                                                                                    | protein metabolic process,cellular process                                                                                                              |                                                   | catalytic activity                                           |
| ug1634     | 772                  |                                                                                                                                     |                                                                                                                                                         |                                                   |                                                              |
| ug1635     | 541                  |                                                                                                                                     |                                                                                                                                                         |                                                   |                                                              |
| ug1636     | 727                  | GO:0005739                                                                                                                          |                                                                                                                                                         | mitochondrion                                     |                                                              |
| ug1637     | 1172                 | GO:0005829,GO:0005                                                                                                                  |                                                                                                                                                         | cytosol,cellular_component                        |                                                              |
| ug1638     | 1105                 | GO:0005488,GO:0005887,GO:0005730,GO:0005                                                                                            |                                                                                                                                                         | nucleolus,intracellular                           | binding,protein binding                                      |
| ug1639     | 887                  | GO:0005730,GO:0005                                                                                                                  |                                                                                                                                                         |                                                   |                                                              |
| ug1640     | 394                  | GO:0008289,GO:0006                                                                                                                  | transport                                                                                                                                               |                                                   | lipid binding                                                |
| ug1641     | 691                  | GO:0008152,GO:0005488,GO:0009536,GO:0                                                                                               | metabolic process                                                                                                                                       | plastid                                           | binding,catalytic activity                                   |
| ug1642     | 1242                 |                                                                                                                                     |                                                                                                                                                         |                                                   |                                                              |
| ug1643     | 1008                 | GO:0005840,GO:0005198,GO:0006412                                                                                                    | translation                                                                                                                                             | ribosome                                          | structural molecule activity                                 |
| ug1644     | 671                  | GO:0005840,GO:0005198,GO:0006412                                                                                                    | translation                                                                                                                                             | ribosome                                          | structural molecule activity                                 |
| ug1645     | 489                  | GO:0005840,GO:0005198,GO:0006412                                                                                                    | translation                                                                                                                                             | ribosome                                          | structural molecule activity                                 |
| ug1646     | 808                  | GO:0016740,GO:0009                                                                                                                  | biosynthetic process                                                                                                                                    |                                                   | transferase activity                                         |
| ug1647     | 583                  |                                                                                                                                     |                                                                                                                                                         |                                                   |                                                              |
| ug1648     | 663                  | GO:0005198,GO:0009987,GO:0005840,GO:0005829,GO:0006412,GO:0006950,GO:0009056,GO:0006519,GO:0005739,GO:0009875,GO:0007275,GO:0000000 | cellular process,translation response to stress,catabolic process,cellular amino acid and derivative metabolic process,pollen-pistil                    | ribosome,cytosol                                  | structural molecule activity                                 |
| ug1649     | 650                  | GO:0009856,GO:0009653,GO:0016043,GO:0030154,GO:0016049,GO:0016740,GO:0007610,GO:0009605,GO:0003723,GO:0006412,GO:0008135            | interaction,multicellular organismal development,reproduction,pollination,anatomical structure morphogenesis,cellular component organization,cell di... | mitochondrion,plasma membrane                     | transferase activity,binding                                 |
| ug1650     | 677                  | GO:0005840,GO:0005198,GO:0009987,GO:0009607,GO:0006950                                                                              | cellular process,translation response to biotic stimulus,response to stress                                                                             |                                                   | RNA binding,translation factor activity, nucleic acid        |
| ug1651     | 1102                 | GO:0005840,GO:0005198,GO:0009987,GO:0009607,GO:0006950                                                                              | cellular process,translation                                                                                                                            | ribosome                                          | structural molecule activity                                 |
| ug1652     | 819                  |                                                                                                                                     |                                                                                                                                                         |                                                   |                                                              |
| ug1653     | 807                  |                                                                                                                                     |                                                                                                                                                         |                                                   |                                                              |
| ug1654     | 544                  |                                                                                                                                     |                                                                                                                                                         |                                                   |                                                              |
| ug1655     | 1443                 | GO:0016740,GO:0009058,GO:0006519,GO:0019748                                                                                         | biosynthetic process,cellular amino acid and derivative metabolic process,secondary metabolic                                                           |                                                   | transferase activity                                         |
| ug1656     | 543                  |                                                                                                                                     |                                                                                                                                                         |                                                   |                                                              |

| Unigene ID | sequence length (bp) | GO-ID                                                                                     | Biological process                                                                                                                                            | Cellular component                                     | Molecular function                           |
|------------|----------------------|-------------------------------------------------------------------------------------------|---------------------------------------------------------------------------------------------------------------------------------------------------------------|--------------------------------------------------------|----------------------------------------------|
| ug1657     | 817                  | GO:0009628,GO:0006950                                                                     | response to abiotic stimulus,response to stress                                                                                                               |                                                        |                                              |
| ug1658     | 839                  | GO:0005488                                                                                |                                                                                                                                                               |                                                        | binding                                      |
| ug1659_1   | 1180                 | GO:0005730,GO:0005198,GO:0009987,GO:0005840,GO:0005829,G                                  | cellular process,translation                                                                                                                                  | nucleolus,ribosome,cytosol                             | structural molecule activity                 |
| ug1659_2   | 516                  |                                                                                           |                                                                                                                                                               |                                                        |                                              |
| ug1660     | 1330                 | GO:0006810,GO:0016020,GO:0005215                                                          | transport                                                                                                                                                     | membrane                                               | transporter activity                         |
| ug1661     | 920                  | GO:0003824,GO:0016740                                                                     |                                                                                                                                                               |                                                        | catalytic activity,transferase activity      |
| ug1662     | 683                  | GO:0005198,GO:0003723,GO:0005840,GO:0005730,GO:0005773,GO:0005198,GO:0005840,GO:0005829,G | translation                                                                                                                                                   | ribosome                                               | structural molecule activity,RNA binding     |
| ug1663     | 821                  | GO:0005198,GO:0005840,GO:0005829,G                                                        | translation                                                                                                                                                   | nucleolus,vacuole,ribosome,cytosol,membrane            | structural molecule activity                 |
| ug1664     | 589                  | GO:0005215,GO:0016020,GO:0005739,GO:0006810,GO:0006091,G                                  | transport,generation of precursor metabolites and energy,nucleobase, nucleoside, nucleotide and nucleic acid metabolic process,biosynthetic                   | membrane,mitochondrion                                 | transporter activity,hydrolase activity      |
| ug1665     | 1154                 | GO:0005840,GO:0005198,GO:0003723,GO:0005773,GO:0003824,GO:0009058,GO:0009058,GO:0009058   | translation                                                                                                                                                   | ribosome                                               | structural molecule activity,RNA binding     |
| ug1666     | 557                  |                                                                                           |                                                                                                                                                               |                                                        |                                              |
| ug1667     | 558                  | GO:0005737,GO:0003824,GO:0009058,GO:0009058                                               | biosynthetic process,cellular amino acid and derivative metabolic                                                                                             | cytoplasm                                              | catalytic activity                           |
| ug1668     | 150                  |                                                                                           |                                                                                                                                                               |                                                        |                                              |
| ug1669     | 837                  |                                                                                           |                                                                                                                                                               |                                                        |                                              |
| ug1670     | 945                  | GO:0005840,GO:0005198,GO:0006412                                                          | translation                                                                                                                                                   | ribosome                                               | structural molecule activity                 |
| ug1671     | 1084                 |                                                                                           |                                                                                                                                                               |                                                        |                                              |
| ug1672     | 1094                 | GO:0008152,GO:0009536,GO:0009579,GO:0006950,GO:0009628,G                                  | metabolic process,response to stress,response to abiotic stimulus                                                                                             | plastid,thylakoid,mitochondrion                        | catalytic activity,transporter activity      |
| ug1673     | 704                  | GO:0005198,GO:0003723,GO:0005840,GO:0009579,GO:0003824,GO:0009579,GO:0003824              | translation                                                                                                                                                   | ribosome                                               | structural molecule activity,RNA binding     |
| ug1674     | 670                  | GO:0016020,GO:0009536,GO:0015979                                                          | photosynthesis                                                                                                                                                | thylakoid,membrane,plastid                             | catalytic activity                           |
| ug1675     | 163                  |                                                                                           |                                                                                                                                                               |                                                        |                                              |
| ug1676     | 701                  | GO:0005623,GO:0006950,GO:0009058,GO:0006519,GO:0019748                                    | response to stress,biosynthetic process,cellular amino acid and derivative metabolic process,secondary metabolic                                              | cell                                                   |                                              |
| ug1677     | 658                  | GO:0006412,GO:0000003,GO:0009791,GO:0009790,GO:0005730,G                                  | translation,reproduction,post-embryonic development,embryonic development,protein modification process                                                        | nucleolus,ribosome,cytosol                             | structural molecule activity,protein binding |
| ug1678     | 846                  |                                                                                           |                                                                                                                                                               |                                                        |                                              |
| ug1679     | 590                  | GO:0016020,GO:0005739,GO:0003824,GO:0005886                                               |                                                                                                                                                               | membrane,mitochondrion                                 | catalytic activity,transporter activity      |
| ug1680     | 889                  | GO:0005886                                                                                |                                                                                                                                                               | plasma membrane                                        |                                              |
| ug1681     | 499                  | GO:0006950                                                                                | response to stress                                                                                                                                            |                                                        |                                              |
| ug1682     | 1878                 | GO:0005488,GO:0000003,GO:0009791,GO:0009790,GO:0016787,G                                  | reproduction,post-embryonic development,embryonic development,regulation of gene expression, epigenetic,cellular process,metabolic process,cellular component | plasma membrane                                        | binding,hydrolase activity                   |
| ug1683     | 666                  |                                                                                           |                                                                                                                                                               |                                                        |                                              |
| ug1684     | 843                  | GO:0009607,GO:0006950                                                                     | response to biotic stimulus,response to stress                                                                                                                |                                                        |                                              |
| ug1685     | 1761                 | GO:0016787,GO:000618,GO:0005773,GO:0005886,GO:0005576                                     |                                                                                                                                                               | cell wall,vacuole,plasma membrane,extracellular region | hydrolase activity                           |
| ug1686     | 903                  | GO:0005198,GO:0005840,GO:0006412                                                          | translation                                                                                                                                                   | ribosome                                               | structural molecule activity                 |
| ug1687_1   | 981                  | GO:0000166,GO:0003824,GO:0000008                                                          |                                                                                                                                                               |                                                        | nucleotide binding,RNA catalytic activity    |
| ug1687_2   | 1399                 |                                                                                           | metabolic process                                                                                                                                             |                                                        |                                              |
| ug1688     | 920                  |                                                                                           |                                                                                                                                                               |                                                        |                                              |
| ug1689     | 644                  |                                                                                           |                                                                                                                                                               |                                                        |                                              |
| ug1690     | 841                  |                                                                                           |                                                                                                                                                               |                                                        |                                              |
| ug1691     | 967                  | GO:0016020,GO:0006810,GO:0009987                                                          | transport,cellular process                                                                                                                                    | membrane                                               |                                              |
| ug1692     | 601                  |                                                                                           |                                                                                                                                                               |                                                        |                                              |
| ug1693     | 1096                 | GO:0005886,GO:0016020,GO:0008150                                                          | biological_process                                                                                                                                            | plasma membrane,membrane                               |                                              |
| ug1694     | 543                  |                                                                                           |                                                                                                                                                               |                                                        |                                              |

| Unigene ID | sequence length (bp) | GO-ID                                                                                                                                                 | Biological process                                                                                                                                                        | Cellular component                       | Molecular function                                |
|------------|----------------------|-------------------------------------------------------------------------------------------------------------------------------------------------------|---------------------------------------------------------------------------------------------------------------------------------------------------------------------------|------------------------------------------|---------------------------------------------------|
| ug1695     | 773                  | GO:0005730,GO:0005198,GO:0000003,GO:0009791,GO:0009790,GO:0005840,GO:0005829,GO:0006412,GO:000                                                        | reproduction,post-embryonic development,embryonic development,translation                                                                                                 | nucleolus,ribosome,cytosol,mitochondrion | structural molecule activity                      |
| ug1696     | 842                  | GO:0016020,GO:0005737,GO:0005739                                                                                                                      |                                                                                                                                                                           | membrane,cytoplasm,mitochondrion         |                                                   |
| ug1697     | 536                  |                                                                                                                                                       |                                                                                                                                                                           |                                          |                                                   |
| ug1698     | 480                  |                                                                                                                                                       |                                                                                                                                                                           |                                          |                                                   |
| ug1699     | 895                  | GO:0005840,GO:0006464,GO:0005198,GO:0005840,GO:0000166,GO:0003723                                                                                     | protein modification process,translation                                                                                                                                  | ribosome                                 | structural molecule activity                      |
| ug1700     | 884                  | GO:0005840,GO:0000166,GO:0003723                                                                                                                      |                                                                                                                                                                           | ribosome                                 | nucleotide binding,RNA binding                    |
| ug1701_1   | 561                  | GO:0006810                                                                                                                                            | transport                                                                                                                                                                 |                                          |                                                   |
| ug1701_2   | 1065                 |                                                                                                                                                       |                                                                                                                                                                           |                                          |                                                   |
| ug1702     | 800                  | GO:0005840,GO:0005198,GO:0006412                                                                                                                      | translation                                                                                                                                                               | ribosome                                 | structural molecule activity                      |
| ug1703     | 805                  | GO:0006412,GO:0008135                                                                                                                                 | translation                                                                                                                                                               |                                          | translation factor activity, nucleic acid binding |
| ug1704     | 735                  | GO:0005198,GO:0005840,GO:0006412                                                                                                                      | translation                                                                                                                                                               | ribosome                                 | structural molecule activity                      |
| ug1705     | 764                  |                                                                                                                                                       |                                                                                                                                                                           |                                          |                                                   |
| ug1706     | 871                  | GO:0016301,GO:0009605,GO:0007165,GO:0009628,GO:0009058,GO:0006139,GO:0000166,GO:0005488                                                               | response to external stimulus,signal transduction,response to abiotic stimulus,biosynthetic process,nucleobase, nucleoside, nucleotide and nucleic acid metabolic process |                                          | kinase activity,nucleotide binding,binding        |
| ug1707     | 1216                 | GO:0005622,GO:0003677,GO:0016043,GO:0009987,GO:0005634,GO:0005622,GO:0003677,GO:0016043,GO:0009987,GO:0005515,GO:0005634,GO:000585                    | cellular component organization,cellular process                                                                                                                          | intracellular,nucleus                    | DNA binding                                       |
| ug1708     | 789                  | GO:0005622,GO:0003677,GO:0016043,GO:0009987,GO:0005515,GO:0005634,GO:000585                                                                           | cellular component organization,cellular process                                                                                                                          | intracellular,nucleus,cytoskeleton       | DNA binding,protein binding                       |
| ug1709     | 963                  |                                                                                                                                                       |                                                                                                                                                                           |                                          |                                                   |
| ug1710     | 1165                 | GO:0008135,GO:0005737,GO:0008150,GO:0005886,GO:0006412,GO:0003674,GO:0016020,GO:0009579,GO:0005488,GO:0006810,GO:0009536,GO:0015979,GO:0005739,GO:000 | biological_process,translation                                                                                                                                            | cytoplasm,plasma membrane                | translation factor activity, nucleic acid binding |
| ug1711     | 1439                 | GO:0005488,GO:0006810,GO:0009536,GO:0015979,GO:0005739,GO:000                                                                                         | transport,photosynthesis,generation of precursor metabolites and energy                                                                                                   | membrane,thylakoid,plastid,mitochondrion | molecular_function,binding                        |
| ug1712     | 609                  |                                                                                                                                                       |                                                                                                                                                                           |                                          |                                                   |
| ug1713     | 532                  |                                                                                                                                                       |                                                                                                                                                                           |                                          |                                                   |
| ug1714_1   | 1308                 |                                                                                                                                                       |                                                                                                                                                                           |                                          |                                                   |
| ug1714_2   | 1200                 | GO:0016787,GO:0008150,GO:0008152                                                                                                                      | biological_process,metabolic process                                                                                                                                      |                                          | hydrolase activity                                |
| ug1715_1   | 479                  |                                                                                                                                                       |                                                                                                                                                                           |                                          |                                                   |
| ug1715_2   | 879                  | GO:0009536,GO:0003677,GO:0006091,GO:0015979,GO:0016020,GO:0019538,GO:0009                                                                             | generation of precursor metabolites and energy,photosynthesis                                                                                                             | plastid,membrane,thylakoid               | DNA binding                                       |
| ug1716     | 521                  |                                                                                                                                                       |                                                                                                                                                                           |                                          |                                                   |
| ug1717     | 1240                 | GO:0019538,GO:0009987,GO:0003824,GO:0006810,GO:0008289                                                                                                | protein metabolic process,cellular process,transport                                                                                                                      |                                          | catalytic activity,lipid binding                  |
| ug1718     | 644                  |                                                                                                                                                       |                                                                                                                                                                           |                                          |                                                   |
| ug1719     | 684                  |                                                                                                                                                       |                                                                                                                                                                           |                                          |                                                   |
| ug1720     | 1206                 | GO:0005622,GO:0019538,GO:0009056,GO:0009987,GO:0005634,GO:0005829,GO:0016787,GO:0019538,GO:0003824,GO:0006464                                         | protein metabolic process,catabolic process,cellular process                                                                                                              | intracellular,nucleus,cytosol            | hydrolase activity                                |
| ug1721     | 947                  | GO:0019538,GO:0003824,GO:0006464                                                                                                                      | protein metabolic process,protein modification process                                                                                                                    |                                          | catalytic activity                                |
| ug1722     | 1505                 | GO:0005488,GO:0008152,GO:0003824,GO:0003674,GO:0006950,GO:0005886,GO:0006810,GO:0009987,GO:0005515,GO:0016020,GO:0005794,GO:000519                    | metabolic process,response to stress                                                                                                                                      | plasma membrane,membrane,Golgi apparatus | protein binding,structural molecule activity      |
| ug1723     | 1165                 | GO:0005488,GO:0008152,GO:0003824,GO:0003674,GO:0006950,GO:0005886,GO:0006810,GO:0009987,GO:0005515,GO:0016020,GO:0005794,GO:000519                    | transport,cellular process                                                                                                                                                |                                          |                                                   |
| ug1724     | 642                  | GO:0006464                                                                                                                                            | protein modification process                                                                                                                                              |                                          |                                                   |
| ug1725     | 876                  | GO:0005634,GO:0000166,GO:0003723                                                                                                                      |                                                                                                                                                                           | nucleus                                  | nucleotide binding,RNA binding                    |
| ug1726     | 1254                 | GO:0005618                                                                                                                                            |                                                                                                                                                                           | cell wall                                |                                                   |
| ug1727     | 601                  | GO:0005622,GO:0003677,GO:0016043,GO:0009987,GO:0005515,GO:0005634,GO:000585                                                                           | cellular component organization,cellular process                                                                                                                          | intracellular,nucleus,cytoskeleton       | DNA binding,protein binding                       |

| Unigene ID | sequence length (bp) | GO-ID                                                                                                                            | Biological process                                                                                                                                                                                                                           | Cellular component                                                | Molecular function                               |
|------------|----------------------|----------------------------------------------------------------------------------------------------------------------------------|----------------------------------------------------------------------------------------------------------------------------------------------------------------------------------------------------------------------------------------------|-------------------------------------------------------------------|--------------------------------------------------|
| ug1728     | 568                  |                                                                                                                                  |                                                                                                                                                                                                                                              |                                                                   |                                                  |
| ug1729     | 1210                 |                                                                                                                                  |                                                                                                                                                                                                                                              |                                                                   |                                                  |
| ug1730     | 856                  |                                                                                                                                  |                                                                                                                                                                                                                                              |                                                                   |                                                  |
| ug1731     | 883                  | GO:0005737,GO:0006464,GO:0005515,GO:019538,GO:0009056,GO:0009987,GO:0005630,GO:0016020,GO:0009536,GO:0009579                     | protein modification process,protein metabolic process,catabolic process,cellular process                                                                                                                                                    | cytoplasm,nucleus                                                 | protein binding                                  |
| ug1732     | 652                  | GO:0016020,GO:0009536,GO:0009579                                                                                                 |                                                                                                                                                                                                                                              | membrane,plastid,thylakoid                                        |                                                  |
| ug1733     | 845                  | GO:0016020,GO:0009536,GO:0005840,GO:0005198,GO:0006412                                                                           | photosynthesis translation                                                                                                                                                                                                                   | membrane,thylakoid,plastid                                        |                                                  |
| ug1734     | 768                  | GO:0005840,GO:0005198,GO:0006412                                                                                                 | translation                                                                                                                                                                                                                                  | ribosome                                                          | structural molecule activity                     |
| ug1735     | 732                  | GO:0006950                                                                                                                       | response to stress                                                                                                                                                                                                                           |                                                                   |                                                  |
| ug1736     | 629                  | GO:0005840,GO:0005198,GO:0005488,GO:0006412,GO:0005739                                                                           | translation                                                                                                                                                                                                                                  | ribosome,mitochondrion                                            | structural molecule activity,protein binding     |
| ug1737     | 1105                 | GO:0006464                                                                                                                       | protein modification process                                                                                                                                                                                                                 |                                                                   |                                                  |
| ug1738     | 1241                 | GO:0016787,GO:0009536,GO:0009987,GO:0006629,GO:0003824                                                                           | biosynthetic process,cellular process,lipid metabolic process                                                                                                                                                                                |                                                                   | hydrolase activity,catalytic activity            |
| ug1739     | 854                  | GO:0005840,GO:0005198,GO:0006412,GO:0006464                                                                                      | translation                                                                                                                                                                                                                                  | ribosome                                                          | structural molecule activity,RNA binding         |
| ug1740     | 878                  |                                                                                                                                  |                                                                                                                                                                                                                                              |                                                                   |                                                  |
| ug1741_1   | 908                  | GO:0005623,GO:0005005                                                                                                            |                                                                                                                                                                                                                                              | cell,cytoplasm                                                    |                                                  |
| ug1741_2   | 805                  | GO:0005634,GO:0000166,GO:0003723                                                                                                 |                                                                                                                                                                                                                                              | nucleus                                                           | nucleotide binding,RNA binding                   |
| ug1742     | 960                  |                                                                                                                                  |                                                                                                                                                                                                                                              |                                                                   |                                                  |
| ug1743     | 1171                 | GO:0005622,GO:0019538,GO:0009056,GO:0009987,GO:0005634,GO:0005829,GO:0016787,GO:0005856,GO:0005737,GO:0000166,GO:0006464         | protein metabolic process,catabolic process,cellular process                                                                                                                                                                                 | intracellular,nucleus,cytosol                                     | hydrolase activity                               |
| ug1744     | 1671                 | GO:0005622,GO:0019538,GO:0009056,GO:0009987,GO:0005634,GO:0005829,GO:0016787,GO:0005856,GO:0005737,GO:0000166,GO:0006464         |                                                                                                                                                                                                                                              | cytoskeleton,cytoplasm                                            | nucleotide binding,protein binding               |
| ug1745     | 842                  |                                                                                                                                  |                                                                                                                                                                                                                                              |                                                                   |                                                  |
| ug1746     | 731                  |                                                                                                                                  |                                                                                                                                                                                                                                              |                                                                   |                                                  |
| ug1747     | 612                  | GO:0008150,GO:0016787,GO:0003824,GO:0006950,GO:0005829,GO:0016787,GO:0005856,GO:0005739,GO:0009600,GO:0005730,GO:0009600         | biological_process response to stress,response to biotic stimulus,metabolic process,carbohydrate metabolic process,generation of precursor metabolites and energy,catabolic process,biosynthetic process,cellular process,biological_process | membrane                                                          |                                                  |
| ug1748     | 839                  | GO:0008152,GO:0000166,GO:0005975,GO:0006091,GO:0009056,GO:0009058,GO:0009987,GO:0009536,GO:0006464,GO:0009987,GO:0006464         | biosynthetic process,cellular amino acid and derivative metabolic process,secondary metabolic process,cellular process,catabolic process,carbohydrate metabolic process                                                                      | cytosol,cell wall,mitochondrion,nucleolus,plastid,plasma membrane | catalytic activity,nucleotide binding            |
| ug1749     | 1440                 | GO:0006519,GO:0019748,GO:0016787,GO:0009987,GO:0009056,GO:0005975,GO:0016740,GO:0009987,GO:0006519,GO:0019748                    | biosynthetic process,cellular amino acid and derivative metabolic process,secondary metabolic process,cellular process,catabolic process,carbohydrate metabolic process                                                                      |                                                                   | transferase activity                             |
| ug1750_1   | 1414                 | GO:0009056,GO:0005975,GO:0016740,GO:0006464                                                                                      | process,carbohydrate metabolic process                                                                                                                                                                                                       |                                                                   | hydrolase activity                               |
| ug1750_2   | 1186                 | GO:0003677,GO:0005515,GO:0009536,GO:0006950,GO:0009987                                                                           | transcription                                                                                                                                                                                                                                | plastid                                                           | transferase activity,DNA binding,protein binding |
| ug1751_1   | 941                  | GO:0008152,GO:0009987,GO:0016020,GO:0005739,GO:0003824,GO:0005215,GO:0005886,GO:0006810,GO:0006090                               | response to stress,response to biotic stimulus,metabolic process,cellular process                                                                                                                                                            | membrane,mitochondrion,plasma membrane,plastid                    | catalytic activity,transporter activity          |
| ug1751_2   | 1166                 | GO:0005215,GO:0005886,GO:0006810,GO:0006090                                                                                      | transport,generation of precursor metabolites and energy                                                                                                                                                                                     | membrane,mitochondrion,plasma membrane,plastid                    | catalytic activity,transporter activity          |
| ug1752     | 740                  | GO:0005515,GO:0005005,GO:0005198,GO:0005005                                                                                      |                                                                                                                                                                                                                                              | extracellular region                                              | protein binding                                  |
| ug1753     | 927                  | GO:0005829,GO:0016020,GO:0006412                                                                                                 | translation                                                                                                                                                                                                                                  | ribosome,cytosol,membrane                                         | structural molecule activity                     |
| ug1754     | 779                  | GO:0005737,GO:0006412,GO:0005198,GO:0003723,GO:0005840,GO:0005215,GO:0016020,GO:0006810,GO:0006090                               | response to stress                                                                                                                                                                                                                           | cytoplasm                                                         |                                                  |
| ug1755     | 1017                 | GO:0005198,GO:0003723,GO:0005840,GO:0005215,GO:0016020,GO:0006810,GO:0006090                                                     | translation                                                                                                                                                                                                                                  | ribosome                                                          | structural molecule activity,RNA binding         |
| ug1756     | 952                  | GO:00091,GO:0006139,GO:0009058,GO:0008289,GO:0005622,GO:0007165,GO:0005151,GO:0005488,GO:000628,GO:0009791,GO:0003677,GO:0006464 | transport,generation of precursor metabolites and energy,nucleobase, nucleoside, nucleotide and nucleic acid metabolic process,biosynthetic process                                                                                          | membrane,intracellular,plastid,thylakoid                          | transporter activity,lipid binding               |
| ug1757     | 873                  | GO:0005488,GO:000628,GO:0009791,GO:0003677,GO:0006464                                                                            | signal transduction,response to abiotic stimulus,post-embryonic development,biological_process                                                                                                                                               |                                                                   | protein binding,protein binding                  |
| ug1758     | 1602                 | GO:0003677,GO:0006464                                                                                                            | transcription                                                                                                                                                                                                                                |                                                                   | DNA binding                                      |

| Unigene ID | sequence length (bp) | GO-ID                                                                                                                                         | Biological process                                                                                                                                                                                                                       | Cellular component                 | Molecular function                            |
|------------|----------------------|-----------------------------------------------------------------------------------------------------------------------------------------------|------------------------------------------------------------------------------------------------------------------------------------------------------------------------------------------------------------------------------------------|------------------------------------|-----------------------------------------------|
| ug1759     | 837                  | GO:0005622,GO:0003677,GO:0016043,GO:0009987,GO:0005634                                                                                        | cellular component organization,cellular process                                                                                                                                                                                         | intracellular,nucleus              | DNA binding                                   |
| ug1760     | 1059                 | GO:0019538,GO:0009987,GO:0003824                                                                                                              | protein metabolic process,cellular process                                                                                                                                                                                               |                                    | catalytic activity                            |
| ug1761     | 698                  |                                                                                                                                               |                                                                                                                                                                                                                                          |                                    |                                               |
| ug1762     | 1043                 |                                                                                                                                               |                                                                                                                                                                                                                                          |                                    |                                               |
| ug1763     | 767                  | GO:0005622,GO:0003677,GO:0016043,GO:0009987,GO:0005634                                                                                        | cellular component organization,cellular process                                                                                                                                                                                         | intracellular,nucleus              | DNA binding                                   |
| ug1764     | 1203                 | GO:0005515                                                                                                                                    |                                                                                                                                                                                                                                          |                                    | protein binding                               |
| ug1765     | 785                  | GO:0000003,GO:0009791,GO:0009790                                                                                                              | reproduction,post-embryonic development,embryonic                                                                                                                                                                                        |                                    |                                               |
| ug1766     | 836                  | GO:0019538,GO:0009987,GO:0003824                                                                                                              | protein metabolic process,cellular process                                                                                                                                                                                               |                                    | catalytic activity                            |
| ug1767     | 968                  | GO:0005840,GO:0005198,GO:0009987,GO:0006464                                                                                                   | cellular process,translation protein modification process                                                                                                                                                                                | ribosome                           | structural molecule activity                  |
| ug1768     | 1210                 | GO:0016020,GO:0009987,GO:0005840,GO:0006091,GO:0005840,GO:0009987                                                                             | generation of precursor metabolites and energy,photosynthesis                                                                                                                                                                            | membrane,plastid                   |                                               |
| ug1770_1   | 748                  | GO:0005198,GO:0005829,GO:0006412,GO:0019538,GO:0009987,GO:0009579,GO:0009536,GO:0005488,GO:0005737,GO:0003824,GO:0005773,GO:0005198           | translation protein metabolic process,cellular process                                                                                                                                                                                   | ribosome,plastid,cytosol           | structural molecule activity,RNA binding      |
| ug1770_2   | 782                  | GO:0005198,GO:0005840,GO:0005829,GO:0006412,GO:0005198,GO:0005840,GO:0005488,GO:0005737,GO:0003824,GO:0005773,GO:0005198                      | translation protein metabolic process,cellular process                                                                                                                                                                                   | thylakoid,plastid,cytoplasm        | binding,catalytic activity                    |
| ug1771     | 780                  | GO:0005198,GO:0005840,GO:0005829,GO:0006412,GO:0005198,GO:0005840,GO:0005488,GO:0005737,GO:0003824,GO:0005773,GO:0005198                      | translation                                                                                                                                                                                                                              | vacuole,ribosome,cytosol           | structural molecule activity                  |
| ug1772     | 1200                 | GO:0005198,GO:0005840,GO:0005829,GO:0006412,GO:0005198,GO:0005840,GO:0005488,GO:0005737,GO:0003824,GO:0005773,GO:0005198                      | translation                                                                                                                                                                                                                              | ribosome                           | structural molecule activity                  |
| ug1773     | 948                  | GO:0005198,GO:0005840,GO:0005829,GO:0006412,GO:0005198,GO:0005840,GO:0005488,GO:0005737,GO:0003824,GO:0005773,GO:0005198                      | metabolic process,cellular process                                                                                                                                                                                                       | cytoplasm                          | binding,catalytic activity,molecular_function |
| ug1774_1   | 625                  | GO:0008150,GO:000515,GO:0016787,GO:0005622,GO:0003677,GO:0016043,GO:0009987,GO:0005634,GO:0005840,GO:0005198,GO:0006412,GO:0005198,GO:0006412 | biological_process                                                                                                                                                                                                                       | plasma membrane                    | protein binding,hydrolase activity            |
| ug1774_2   | 751                  | GO:0005198,GO:0005840,GO:0005829,GO:0006412,GO:0005198,GO:0005840,GO:0005488,GO:0005737,GO:0003824,GO:0005773,GO:0005198                      | cellular component organization,cellular process                                                                                                                                                                                         | intracellular,nucleus              | DNA binding                                   |
| ug1775     | 591                  | GO:0005198,GO:0005840,GO:0005829,GO:0006412,GO:0005198,GO:0005840,GO:0005488,GO:0005737,GO:0003824,GO:0005773,GO:0005198                      | translation                                                                                                                                                                                                                              | ribosome                           | structural molecule activity                  |
| ug1776     | 564                  | GO:0005198,GO:0005840,GO:0005829,GO:0006412,GO:0005198,GO:0005840,GO:0005488,GO:0005737,GO:0003824,GO:0005773,GO:0005198                      | cellular process,translation                                                                                                                                                                                                             | ribosome,cytosol                   | structural molecule activity                  |
| ug1777     | 904                  | GO:0005198,GO:0005840,GO:0005829,GO:0006412,GO:0005198,GO:0005840,GO:0005488,GO:0005737,GO:0003824,GO:0005773,GO:0005198                      | protein modification process,protein metabolic process,catabolic process,cellular                                                                                                                                                        |                                    | catalytic activity                            |
| ug1778     | 212                  |                                                                                                                                               |                                                                                                                                                                                                                                          |                                    |                                               |
| ug1779     | 786                  | GO:0003676,GO:0000166                                                                                                                         |                                                                                                                                                                                                                                          |                                    | nucleic acid binding,nucleotide binding       |
| ug1780     | 682                  | GO:0005840,GO:0005198,GO:0006412                                                                                                              | translation                                                                                                                                                                                                                              | ribosome                           | structural molecule activity                  |
| ug1781     | 1117                 | GO:0005737,GO:0009058,GO:0005975,GO:0009987,GO:0006629,GO:0003824,GO:0006139,GO:0009056,GO:0019748,GO:0006091                                 | biosynthetic process,carbohydrate metabolic process,cellular process,lipid metabolic process,nucleobase, nucleoside, nucleotide and nucleic acid metabolic process,catabolic process,secondary metabolic process,generation of precursor | cytoplasm                          | catalytic activity                            |
| ug1782     | 563                  | GO:0005622,GO:0003677,GO:0016043,GO:0009987,GO:0005515,GO:0005634,GO:000585                                                                   | cellular component organization,cellular process                                                                                                                                                                                         | intracellular,nucleus,cytoskeleton | DNA binding,protein binding                   |
| ug1783     | 587                  |                                                                                                                                               |                                                                                                                                                                                                                                          |                                    |                                               |
| ug1784_1   | 1063                 | GO:0005840,GO:0005198,GO:0006412                                                                                                              | translation                                                                                                                                                                                                                              | ribosome                           | structural molecule activity                  |
| ug1784_2   | 985                  |                                                                                                                                               |                                                                                                                                                                                                                                          |                                    |                                               |
| ug1785_1   | 624                  |                                                                                                                                               |                                                                                                                                                                                                                                          |                                    |                                               |
| ug1785_2   | 1365                 | GO:0016740,GO:0009058,GO:0006519,GO:0019748,GO:0005515                                                                                        | biosynthetic process,cellular amino acid and derivative metabolic process,secondary metabolic                                                                                                                                            |                                    | transferase activity,protein binding          |
| ug1786     | 1545                 | GO:0016740                                                                                                                                    |                                                                                                                                                                                                                                          |                                    | transferase activity                          |
| ug1787     | 929                  | GO:0006810,GO:0016020,GO:0005215,GO:0005198,GO:0005840                                                                                        | transport                                                                                                                                                                                                                                | membrane                           | transporter activity                          |
| ug1788     | 1497                 | GO:0005198,GO:0005840,GO:0005829,GO:0006412,GO:0003723,GO:0005198,GO:0005840,GO:0005488,GO:0005737,GO:0003824,GO:0005773,GO:0005198           | translation                                                                                                                                                                                                                              | ribosome,plastid,mitochondrion     | structural molecule activity,RNA binding      |

| Unigene ID | sequence length (bp) | GO-ID                                                                      | Biological process                                                                             | Cellular component                       | Molecular function                                                           |
|------------|----------------------|----------------------------------------------------------------------------|------------------------------------------------------------------------------------------------|------------------------------------------|------------------------------------------------------------------------------|
| ug1789     | 673                  | GO:0005622,GO:0003677,GO:0016043,GO:0009987,GO:0009536,G                   | cellular component<br>organization,cellular process                                            | intracellular,plastid,nucleus            | DNA binding                                                                  |
| ug1790     | 1462                 |                                                                            |                                                                                                |                                          |                                                                              |
| ug1791     | 858                  | GO:0007165,GO:000515,GO:0005488,GO:0016740,GO:0009628,GO:0009791,GO:000815 | signal transduction,response to abiotic stimulus,post-embryonic development,biological_process |                                          | protein binding,transferase activity                                         |
| ug1792     | 805                  | GO:0006412,GO:0008135,GO:0005739                                           | translation                                                                                    | mitochondrion                            | translation factor activity, nucleic acid binding                            |
| ug1793     | 624                  | GO:0009719,GO:0008150                                                      | response to endogenous stimulus,biological_process                                             |                                          |                                                                              |
| ug1794     | 577                  |                                                                            |                                                                                                |                                          |                                                                              |
| ug1795     | 160                  |                                                                            |                                                                                                |                                          |                                                                              |
| ug1796     | 742                  |                                                                            |                                                                                                |                                          |                                                                              |
| ug1797     | 666                  | GO:0006139                                                                 | nucleobase, nucleoside, nucleotide and nucleic acid metabolic process                          |                                          |                                                                              |
| ug1798_1   | 911                  | GO:0005488,GO:0008152,GO:0003824,GO:0                                      | metabolic process,response to stress                                                           |                                          | binding,catalytic activity                                                   |
| ug1798_2   | 401                  |                                                                            |                                                                                                |                                          |                                                                              |
| ug1799     | 699                  | GO:0003677                                                                 |                                                                                                |                                          | DNA binding                                                                  |
| ug1800     | 435                  |                                                                            |                                                                                                |                                          |                                                                              |
| ug1801_1   | 906                  | GO:0003824,GO:0009005,GO:0009058,GO:0009                                   |                                                                                                | plastid                                  | catalytic activity                                                           |
| ug1801_2   | 854                  | 987,GO:0006629,GO:0005215,GO:0005488,G                                     | biosynthetic process,cellular process,lipid metabolic process                                  | plastid                                  | transporter activity,binding                                                 |
| ug1802     | 858                  |                                                                            |                                                                                                |                                          |                                                                              |
| ug1803     | 695                  |                                                                            |                                                                                                |                                          |                                                                              |
| ug1804     | 969                  | GO:0016043,GO:000987,GO:0005622,GO:0005634,GO:0003700,GO:0005198,GO:000368 | cellular component<br>organization,cellular process                                            | intracellular,nucleus                    | transcription factor activity,structural molecule activity,chromatin binding |
| ug1805     | 613                  | GO:0005840,GO:0005198,GO:0006412                                           | translation                                                                                    | ribosome                                 | structural molecule activity                                                 |
| ug1806     | 700                  |                                                                            |                                                                                                |                                          |                                                                              |
| ug1807     | 444                  | GO:0005840,GO:0005198,GO:0006412,GO:0005622,GO:0003                        | translation                                                                                    | ribosome,mitochondrion                   | structural molecule activity                                                 |
| ug1808     | 733                  | 677,GO:0016043,GO:0009987,GO:0009536,G                                     | cellular component<br>organization,cellular process                                            | intracellular,plastid,nucleus            | DNA binding                                                                  |
| ug1809     | 625                  |                                                                            |                                                                                                |                                          |                                                                              |
| ug1810     | 1153                 | GO:0008152,GO:0005488,GO:0030528,GO:0005840,GO:0005198,GO:0006412          | metabolic process                                                                              |                                          | binding,transcription regulator activity,catalytic                           |
| ug1811     | 594                  | GO:0005840,GO:0005198,GO:0006412                                           | translation                                                                                    | ribosome                                 | structural molecule activity                                                 |
| ug1812     | 992                  | GO:0006950                                                                 | response to stress                                                                             |                                          |                                                                              |
| ug1813_1   | 741                  |                                                                            |                                                                                                |                                          |                                                                              |
| ug1813_2   | 822                  | GO:0005622,GO:0003677,GO:0016043,GO:0009987,GO:0005634                     | cellular component<br>organization,cellular process                                            | intracellular,nucleus                    | DNA binding                                                                  |
| ug1814     | 590                  | GO:0005488,GO:0003677,GO:0005840,GO:0005198,GO:0006412                     | translation                                                                                    | ribosome                                 | binding,molecular_function                                                   |
| ug1815     | 1078                 | GO:0005840,GO:0005198,GO:0006412                                           | translation                                                                                    | ribosome                                 | structural molecule activity                                                 |
| ug1816     | 631                  | GO:0005840,GO:0005198,GO:0006412                                           | translation                                                                                    | ribosome                                 | structural molecule activity                                                 |
| ug1817     | 1284                 | GO:0006091,GO:0015979,GO:0005737,GO:0016020,GO:0009579,G                   | generation of precursor metabolites and energy,photosynthesis                                  | cytoplasm,membrane,thylakoid,plastid     |                                                                              |
| ug1818     | 1126                 | GO:0005622,GO:0003677,GO:0016043,GO:0009987,GO:0006950,G                   | cellular component<br>organization,cellular process,response to stress                         | intracellular,nucleus                    | DNA binding                                                                  |
| ug1819     | 686                  |                                                                            |                                                                                                |                                          |                                                                              |
| ug1820     | 921                  | GO:0005840,GO:0005198,GO:0006412                                           | translation                                                                                    | ribosome                                 | structural molecule activity                                                 |
| ug1821     | 719                  | GO:0005739                                                                 |                                                                                                | mitochondrion                            |                                                                              |
| ug1822_1   | 832                  | GO:0005615                                                                 |                                                                                                | extracellular space                      |                                                                              |
| ug1822_2   | 1767                 | GO:0005737,GO:0008135,GO:0000166,GO:0006412,GO:0016787                     | translation                                                                                    | cytoplasm                                | translation factor activity, nucleic acid binding,nucleotide                 |
| ug1823     | 1162                 | GO:0005618,GO:0005198,GO:0016301,GO:0005975,GO:0009987                     | carbohydrate metabolic process,cellular process                                                | cell wall,plasma membrane                |                                                                              |
| ug1824     | 1310                 | GO:0009536,GO:0005622,GO:0006091,GO:0015979,GO:0016020,G                   | generation of precursor metabolites and energy,photosynthesis,protein modification process     | plastid,intracellular,membrane,thylakoid | binding                                                                      |
| ug1825     | 963                  | O:0009579,GO:000548                                                        |                                                                                                |                                          |                                                                              |



| Unigene ID | sequence length (bp) | GO-ID                                                                                                                                                                                                                                                                                 | Biological process                                                                                                                 | Cellular component                   | Molecular function                                                   |
|------------|----------------------|---------------------------------------------------------------------------------------------------------------------------------------------------------------------------------------------------------------------------------------------------------------------------------------|------------------------------------------------------------------------------------------------------------------------------------|--------------------------------------|----------------------------------------------------------------------|
| ug1826     | 826                  | GO:0006091,GO:0015979,GO:0006950,GO:0003674,GO:0005488,GO:0016020,GO:0009579,GO:0006810,GO:000005737,GO:0005634,GO:0006464                                                                                                                                                            | generation of precursor metabolites and energy,photosynthesis,response to stress,transport                                         | membrane,thylakoid,cytoplasm,plastid | molecular_function,binding                                           |
| ug1827     | 1647                 | GO:0005737,GO:0005634,GO:0006464                                                                                                                                                                                                                                                      | protein modification process                                                                                                       | cytoplasm,nucleus                    |                                                                      |
| ug1828     | 178                  |                                                                                                                                                                                                                                                                                       |                                                                                                                                    |                                      |                                                                      |
| ug1829     | 798                  | GO:0016787,GO:0030234                                                                                                                                                                                                                                                                 |                                                                                                                                    |                                      | hydrolase activity,enzyme regulator activity                         |
| ug1830     | 644                  |                                                                                                                                                                                                                                                                                       |                                                                                                                                    |                                      |                                                                      |
| ug1831     | 823                  | GO:0005737,GO:0005772                                                                                                                                                                                                                                                                 |                                                                                                                                    | cytoplasm                            | binding                                                              |
| ug1832     | 772                  |                                                                                                                                                                                                                                                                                       |                                                                                                                                    |                                      |                                                                      |
| ug1833     | 675                  | GO:0005840                                                                                                                                                                                                                                                                            |                                                                                                                                    | ribosome                             |                                                                      |
| ug1834     | 762                  | GO:0006091,GO:0015979,GO:0016020,GO:0005622,GO:0008150,GO:0019538,GO:0009056,GO:0009987,GO:0005634,GO:0005829,GO:0016787,GO:0000019538,GO:0009056,GO:0009987,GO:0006464,GO:0003824,GO:0005622,GO:0003677,GO:0016043,GO:0009987,GO:0005515,GO:0005634,GO:0005850,GO:0006412,GO:0008135 | generation of precursor metabolites and energy,photosynthesis                                                                      | membrane,thylakoid                   |                                                                      |
| ug1835     | 1059                 | GO:0019538,GO:0009056,GO:0009987,GO:0005634,GO:0005829,GO:0016787,GO:0000019538,GO:0009056,GO:0009987,GO:0006464,GO:0003824,GO:0005622,GO:0003677,GO:0016043,GO:0009987,GO:0005515,GO:0005634,GO:0005850                                                                              | biological_process,protein metabolic process,catabolic process,cellular process,response to stress,response to abiotic stimulus    | intracellular,nucleus,cytosol        | hydrolase activity                                                   |
| ug1836     | 1027                 | GO:0019538,GO:0009056,GO:0009987,GO:0006464,GO:0003824,GO:0005622,GO:0003677,GO:0016043,GO:0009987,GO:0005515,GO:0005634,GO:0005850                                                                                                                                                   | protein metabolic process,catabolic process,cellular process,protein modification process                                          |                                      | catalytic activity                                                   |
| ug1837     | 608                  | GO:0016043,GO:0009987,GO:0005515,GO:0005634,GO:0005850                                                                                                                                                                                                                                | cellular component organization,cellular process                                                                                   | intracellular,nucleus,cytoskeleton   | DNA binding,protein binding                                          |
| ug1838     | 1007                 | GO:0006412,GO:0008135                                                                                                                                                                                                                                                                 | translation                                                                                                                        |                                      | translation factor activity,nucleic acid binding                     |
| ug1839     | 674                  | GO:0016020,GO:0005966                                                                                                                                                                                                                                                                 |                                                                                                                                    | membrane,mitochondrion               |                                                                      |
| ug1840     | 966                  |                                                                                                                                                                                                                                                                                       |                                                                                                                                    |                                      |                                                                      |
| ug1841     | 1108                 | GO:0009719,GO:0007165,GO:0016740                                                                                                                                                                                                                                                      | response to endogenous stimulus,signal transduction                                                                                |                                      | transferase activity                                                 |
| ug1842     | 770                  | GO:0005488,GO:0009794                                                                                                                                                                                                                                                                 |                                                                                                                                    | plastid                              | binding                                                              |
| ug1843     | 794                  |                                                                                                                                                                                                                                                                                       |                                                                                                                                    |                                      |                                                                      |
| ug1844     | 1233                 | GO:0006950,GO:0009056,GO:0009987,GO:0005737,GO:0003674,GO:0005488,GO:0008152,GO:0003824,GO:0000019538,GO:0009056,GO:0009987,GO:0003824,GO:0006464                                                                                                                                     | response to stress,catabolic process,cellular process,metabolic process                                                            | cytoplasm,extracellular region       | molecular_function,binding,catalytic activity                        |
| ug1845     | 843                  | GO:0019538,GO:0009056,GO:0009987,GO:0003824,GO:0006464                                                                                                                                                                                                                                | protein metabolic process,catabolic process,cellular process,protein modification process                                          |                                      | catalytic activity                                                   |
| ug1846     | 878                  |                                                                                                                                                                                                                                                                                       |                                                                                                                                    |                                      |                                                                      |
| ug1847     | 956                  |                                                                                                                                                                                                                                                                                       |                                                                                                                                    |                                      |                                                                      |
| ug1848_1   | 891                  |                                                                                                                                                                                                                                                                                       |                                                                                                                                    |                                      |                                                                      |
| ug1848_2   | 890                  | GO:0007165,GO:000515,GO:0005488,GO:0016740,GO:0009628,GO:0009791,GO:000815                                                                                                                                                                                                            | signal transduction,response to abiotic stimulus,post-embryonic development,biological_process                                     |                                      | protein binding,transferase activity                                 |
| ug1849     | 1010                 |                                                                                                                                                                                                                                                                                       |                                                                                                                                    |                                      |                                                                      |
| ug1850     | 529                  |                                                                                                                                                                                                                                                                                       |                                                                                                                                    |                                      |                                                                      |
| ug1851     | 592                  | GO:0005840,GO:0005198,GO:0006412                                                                                                                                                                                                                                                      | translation                                                                                                                        | ribosome                             | structural molecule activity                                         |
| ug1852     | 465                  |                                                                                                                                                                                                                                                                                       |                                                                                                                                    |                                      |                                                                      |
| ug1853     | 739                  | GO:0016020,GO:0009579,GO:0009536,GO:000009536                                                                                                                                                                                                                                         | photosynthesis                                                                                                                     | membrane,thylakoid,plastid           |                                                                      |
| ug1854_1   | 632                  |                                                                                                                                                                                                                                                                                       |                                                                                                                                    | plastid                              |                                                                      |
| ug1854_2   | 1131                 | GO:0009058,GO:0006519,GO:0005488,GO:0003824,GO:0008152                                                                                                                                                                                                                                | biosynthetic process,cellular amino acid and derivative metabolic process,metabolic process                                        |                                      | binding,catalytic activity                                           |
| ug1855     | 665                  | GO:0016020,GO:0009579,GO:0015979,GO:0005622,GO:0003677,GO:0016043,GO:0009987,GO:0005618,GO:0005198,GO:0005840,GO:0006412                                                                                                                                                              | photosynthesis                                                                                                                     | membrane,thylakoid,plastid           |                                                                      |
| ug1856     | 802                  | GO:0016043,GO:0009987,GO:0005618,GO:0005198,GO:0005840,GO:0006412                                                                                                                                                                                                                     | cellular component organization,cellular process                                                                                   | intracellular,cell wall,nucleus      | DNA binding                                                          |
| ug1857     | 794                  |                                                                                                                                                                                                                                                                                       | translation                                                                                                                        | ribosome                             | structural molecule activity                                         |
| ug1858     | 966                  |                                                                                                                                                                                                                                                                                       |                                                                                                                                    |                                      |                                                                      |
| ug1859     | 1049                 | GO:0003824,GO:0005737,GO:0008152,GO:0000016740,GO:0005488,GO:000003824,GO:0008152,GO:0009987,GO:0006091,GO:0009056,GO:0000009536,GO:0000009791,GO:000000003                                                                                                                           | metabolic process                                                                                                                  | cytoplasm                            | catalytic activity,binding                                           |
| ug1860     | 1587                 | GO:0003824,GO:0008152,GO:0009987,GO:0006091,GO:0009056,GO:0000009536,GO:0000009791,GO:000000003                                                                                                                                                                                       | metabolic process,cellular process,generation of precursor metabolites and energy,catabolic process,carbohydrate metabolic process | plasma membrane                      | transferase activity,transferase activity,binding,catalytic activity |
| ug1861     | 798                  | GO:0009056,GO:0000009536,GO:0000009791,GO:000000003                                                                                                                                                                                                                                   | reproduction,post-embryonic development,embryonic                                                                                  | plastid                              |                                                                      |



| Unigene ID | sequence length (bp) | GO-ID                                                                                          | Biological process                                                                                                                                  | Cellular component                       | Molecular function                                |
|------------|----------------------|------------------------------------------------------------------------------------------------|-----------------------------------------------------------------------------------------------------------------------------------------------------|------------------------------------------|---------------------------------------------------|
| ug1902     | 1116                 |                                                                                                |                                                                                                                                                     |                                          |                                                   |
| ug1903     | 475                  |                                                                                                |                                                                                                                                                     |                                          |                                                   |
| ug1904     | 721                  |                                                                                                |                                                                                                                                                     |                                          |                                                   |
| ug1905     | 750                  | GO:0016020,GO:0009579,GO:0015979                                                               | photosynthesis                                                                                                                                      | membrane,thylakoid                       |                                                   |
| ug1906     | 1059                 | GO:0005198,GO:0006                                                                             | transport                                                                                                                                           |                                          | structural molecule activity                      |
| ug1907     | 920                  | GO:0008150                                                                                     | biological_process                                                                                                                                  |                                          |                                                   |
| ug1908     | 846                  | GO:0006810                                                                                     | transport                                                                                                                                           |                                          |                                                   |
| ug1909     | 551                  | GO:0005840,GO:0005198,GO:0006412,GO:0005730,GO:0005                                            | translation                                                                                                                                         | ribosome                                 | structural molecule activity                      |
| ug1910     | 809                  | 198,GO:0000003,GO:0009791,GO:0009790,GO:0005840,GO:0005829,GO:0006412,GO:0009                  | reproduction,post-embryonic development,embryonic development,translation                                                                           | nucleolus,ribosome,cytosol,mitochondrion | structural molecule activity                      |
| ug1911     | 716                  | 579,GO:0006091,GO:0015979,GO:0009536                                                           | generation of precursor metabolites and energy,photosynthesis                                                                                       | membrane,thylakoid,plastid               |                                                   |
| ug1912     | 1084                 | GO:0009579,GO:0009536,GO:0006091,GO:0015979,GO:0005488,GO:0009628,GO:001602                    | generation of precursor metabolites and energy,photosynthesis,response to abiotic stimulus                                                          | thylakoid,plastid,membrane               | binding                                           |
| ug1913     | 733                  | GO:0016787,GO:0005840,GO:0005198,GO:0009058,GO:0005975,GO:0009987,GO:000662                    | biosynthetic process,carbohydrate metabolic process,cellular process,lipid metabolic process,translation                                            | ribosome                                 | hydrolase activity,structural molecule activity   |
| ug1914     | 749                  | GO:0019725,GO:0005829,GO:0003824                                                               | cellular homeostasis                                                                                                                                | cytosol                                  | catalytic activity                                |
| ug1915     | 1419                 | GO:0005737,GO:0005634,GO:0006464                                                               | protein modification process                                                                                                                        | cytoplasm,nucleus                        |                                                   |
| ug1916     | 916                  | GO:0016020,GO:0009579,GO:0005488,GO:0005198,GO:0009                                            | photosynthesis                                                                                                                                      | membrane,thylakoid                       | binding                                           |
| ug1917     | 577                  | 987,GO:0005840,GO:0005829,GO:0005488,GO:0006412,GO:000372                                      | cellular process,translation                                                                                                                        | ribosome,cytosol                         | structural molecule activity,binding,RNA binding  |
| ug1918     | 549                  | GO:0005737,GO:0008152,GO:0003824,GO:0                                                          | metabolic process                                                                                                                                   | cytoplasm                                | catalytic activity,binding                        |
| ug1919     | 819                  |                                                                                                |                                                                                                                                                     |                                          |                                                   |
| ug1920     | 643                  | GO:0005840,GO:0005198,GO:0006412                                                               | translation                                                                                                                                         | ribosome                                 | structural molecule activity                      |
| ug1921     | 1433                 | GO:0005840,GO:0005198,GO:0009987,GO:0006412,GO:0009                                            | cellular process,translation                                                                                                                        | ribosome                                 | structural molecule activity                      |
| ug1922     | 702                  | GO:0016020,GO:0009579,GO:0005515,GO:0                                                          | photosynthesis                                                                                                                                      | membrane,thylakoid                       | protein binding                                   |
| ug1923     | 1035                 | GO:0006950                                                                                     | response to stress                                                                                                                                  |                                          |                                                   |
| ug1924     | 770                  |                                                                                                |                                                                                                                                                     |                                          |                                                   |
| ug1925     | 1137                 | GO:0006950,GO:0009579,GO:0005773,GO:0006810,GO:0005886,GO:0016020,GO:000521                    | response to stress,response to abiotic stimulus,transport                                                                                           | vacuole,plasma membrane,membrane,plastid | transporter activity                              |
| ug1926     | 803                  | GO:0005622,GO:0003677,GO:0016043,GO:0009987,GO:0005634                                         | cellular component organization,cellular process                                                                                                    | intracellular,nucleus                    | DNA binding                                       |
| ug1927     | 855                  |                                                                                                |                                                                                                                                                     |                                          |                                                   |
| ug1928     | 753                  | GO:0016020,GO:0009579,GO:0009536,GO:0                                                          | photosynthesis                                                                                                                                      | membrane,thylakoid,plastid               |                                                   |
| ug1929     | 725                  |                                                                                                |                                                                                                                                                     |                                          |                                                   |
| ug1930     | 1036                 | GO:0005488,GO:0008152,GO:0006950,GO:0009987,GO:0005739,GO:0005840,GO:0006                      | metabolic process,response to stress,cellular process                                                                                               | mitochondrion                            | binding,catalytic activity                        |
| ug1931     | 431                  | 464,GO:0005198,GO:0005634,GO:0006412                                                           | protein modification process,translation                                                                                                            | ribosome,nucleus                         | structural molecule activity                      |
| ug1932     | 725                  | GO:0006810                                                                                     | transport                                                                                                                                           |                                          |                                                   |
| ug1933     | 692                  | GO:0005840,GO:0005198,GO:0006412                                                               | translation                                                                                                                                         | ribosome                                 | structural molecule activity                      |
| ug1934     | 755                  | GO:0006412,GO:0008135                                                                          | translation                                                                                                                                         |                                          | translation factor activity, nucleic acid binding |
| ug1935     | 696                  | GO:0005215,GO:0016020,GO:0005739,GO:0006810,GO:0006091,GO:0006139,GO:0009058,GO:0008289,GO:000 | transport,generation of precursor metabolites and energy,nucleobase, nucleoside, nucleotide and nucleic acid metabolic process,biosynthetic process | membrane,mitochondrion,intracellular ar  | transporter activity,lipid binding                |
| ug1936     | 741                  | GO:0005840,GO:0005198,GO:0006412                                                               | translation                                                                                                                                         | ribosome                                 | structural molecule activity                      |
| ug1937     | 1050                 | GO:0005488                                                                                     |                                                                                                                                                     |                                          | binding                                           |
| ug1938     | 661                  |                                                                                                |                                                                                                                                                     |                                          |                                                   |





| Unigene ID | sequence length (bp) | GO-ID                                                                                                                                                               | Biological process                                                                                                                                                                                                                                                                        | Cellular component                       | Molecular function                                         |
|------------|----------------------|---------------------------------------------------------------------------------------------------------------------------------------------------------------------|-------------------------------------------------------------------------------------------------------------------------------------------------------------------------------------------------------------------------------------------------------------------------------------------|------------------------------------------|------------------------------------------------------------|
| ug2019_1   | 449                  | GO:000166,GO:0009058,GO:0009987,GO:006629,GO:0008152,GO:0016020,GO:0006139,GO:0003824,GO:00016020,GO:0008152,GO:0009058,GO:0009987,GO:0006629,GO:0006139,GO:0003824 | biosynthetic process,cellular process,lipid metabolic process,metabolic process,nucleobase, nucleoside, nucleotide and nucleic acid metabolic process,biosynthetic process,cellular process,lipid metabolic process,nucleobase, nucleoside, nucleotide and nucleic acid metabolic process | membrane,endoplasmic reticulum           | nucleotide binding,catalytic activity                      |
| ug2019_2   | 436                  | GO:0009987,GO:0006629,GO:0006139,GO:0003824                                                                                                                         | metabolic process,nucleobase, nucleoside, nucleotide and nucleic acid metabolic process                                                                                                                                                                                                   | membrane                                 | nucleotide binding,catalytic activity                      |
| ug2020     | 453                  | GO:0000166                                                                                                                                                          |                                                                                                                                                                                                                                                                                           |                                          | nucleotide binding                                         |
| ug2021     | 443                  |                                                                                                                                                                     |                                                                                                                                                                                                                                                                                           |                                          |                                                            |
| ug2022     | 427                  |                                                                                                                                                                     |                                                                                                                                                                                                                                                                                           |                                          |                                                            |
| ug2023     | 448                  |                                                                                                                                                                     |                                                                                                                                                                                                                                                                                           |                                          |                                                            |
| ug2024     | 437                  |                                                                                                                                                                     |                                                                                                                                                                                                                                                                                           |                                          |                                                            |
| ug2025     | 485                  |                                                                                                                                                                     |                                                                                                                                                                                                                                                                                           |                                          |                                                            |
| ug2026     | 444                  | GO:0016020,GO:0005773,GO:0006810,GO:006091,GO:0006139,GO:0009058,GO:0016787,GO:0005215,GO:0006519,GO:0019748,GO:0009653,GO:0016043,GO:0016049,GO:0009               | transport,generation of precursor metabolites and energy,nucleobase, nucleoside, nucleotide and nucleic acid metabolic process,biosynthetic process,cellular amino acid and derivative metabolic process,secondary metabolic process,anatomical structure mo...                           | membrane,vacuole,plastid,plasma membrane | hydrolase activity,transporter activity                    |
| ug2027     | 460                  |                                                                                                                                                                     |                                                                                                                                                                                                                                                                                           |                                          |                                                            |
| ug2028     | 455                  |                                                                                                                                                                     |                                                                                                                                                                                                                                                                                           |                                          |                                                            |
| ug2029     | 434                  |                                                                                                                                                                     |                                                                                                                                                                                                                                                                                           |                                          |                                                            |
| ug2030     | 452                  |                                                                                                                                                                     |                                                                                                                                                                                                                                                                                           |                                          |                                                            |
| ug2031     | 468                  |                                                                                                                                                                     |                                                                                                                                                                                                                                                                                           |                                          |                                                            |
| ug2032     | 455                  | GO:0003676,GO:0000166                                                                                                                                               |                                                                                                                                                                                                                                                                                           |                                          | nucleic acid binding,nucleotide binding                    |
| ug2033     | 464                  | GO:0005488                                                                                                                                                          |                                                                                                                                                                                                                                                                                           |                                          | binding                                                    |
| ug2034     | 413                  |                                                                                                                                                                     |                                                                                                                                                                                                                                                                                           |                                          |                                                            |
| ug2035     | 382                  |                                                                                                                                                                     |                                                                                                                                                                                                                                                                                           |                                          |                                                            |
| ug2036     | 448                  |                                                                                                                                                                     |                                                                                                                                                                                                                                                                                           |                                          |                                                            |
| ug2037     | 455                  |                                                                                                                                                                     |                                                                                                                                                                                                                                                                                           |                                          |                                                            |
| ug2038     | 452                  |                                                                                                                                                                     |                                                                                                                                                                                                                                                                                           |                                          |                                                            |
| ug2039     | 480                  | GO:0009719,GO:0009628                                                                                                                                               | response to endogenous stimulus,response to abiotic                                                                                                                                                                                                                                       |                                          |                                                            |
| ug2040     | 399                  | GO:0005737,GO:0019538,GO:0009056,GO:0009987,GO:0006810                                                                                                              | protein metabolic process,catabolic process,cellular process,transport                                                                                                                                                                                                                    | cytoplasm                                |                                                            |
| ug2041     | 413                  | GO:0005737,GO:0019538,GO:0009056,GO:0009987,GO:0006810                                                                                                              | protein metabolic process,catabolic process,cellular process,transport                                                                                                                                                                                                                    | cytoplasm                                |                                                            |
| ug2042     | 431                  |                                                                                                                                                                     |                                                                                                                                                                                                                                                                                           |                                          |                                                            |
| ug2043     | 354                  |                                                                                                                                                                     |                                                                                                                                                                                                                                                                                           |                                          |                                                            |
| ug2044     | 309                  |                                                                                                                                                                     |                                                                                                                                                                                                                                                                                           |                                          |                                                            |
| ug2045     | 405                  |                                                                                                                                                                     |                                                                                                                                                                                                                                                                                           |                                          |                                                            |
| ug2046     | 422                  | GO:0005488,GO:0008152,GO:0003824,GO:0003674,GO:0006950                                                                                                              | metabolic process,response to stress                                                                                                                                                                                                                                                      |                                          | binding,catalytic activity,molecular_function              |
| ug2047     | 459                  | GO:0005623,GO:0003824,GO:0005488                                                                                                                                    |                                                                                                                                                                                                                                                                                           | cell                                     | catalytic activity,binding                                 |
| ug2048     | 500                  |                                                                                                                                                                     |                                                                                                                                                                                                                                                                                           |                                          |                                                            |
| ug2049     | 441                  | GO:0005739,GO:0016506                                                                                                                                               |                                                                                                                                                                                                                                                                                           | mitochondrion,membrane                   |                                                            |
| ug2050     | 506                  | GO:0016787                                                                                                                                                          |                                                                                                                                                                                                                                                                                           |                                          | hydrolase activity                                         |
| ug2051     | 433                  |                                                                                                                                                                     |                                                                                                                                                                                                                                                                                           |                                          |                                                            |
| ug2052     | 529                  |                                                                                                                                                                     |                                                                                                                                                                                                                                                                                           |                                          |                                                            |
| ug2053     | 456                  |                                                                                                                                                                     |                                                                                                                                                                                                                                                                                           |                                          |                                                            |
| ug2054     | 359                  |                                                                                                                                                                     |                                                                                                                                                                                                                                                                                           |                                          |                                                            |
| ug2055     | 448                  |                                                                                                                                                                     |                                                                                                                                                                                                                                                                                           |                                          |                                                            |
| ug2056     | 515                  | GO:0005730,GO:0003450                                                                                                                                               |                                                                                                                                                                                                                                                                                           | nucleolus                                | catalytic activity                                         |
| ug2057     | 488                  |                                                                                                                                                                     |                                                                                                                                                                                                                                                                                           |                                          |                                                            |
| ug2058     | 455                  |                                                                                                                                                                     |                                                                                                                                                                                                                                                                                           |                                          |                                                            |
| ug2059_1   | 268                  |                                                                                                                                                                     |                                                                                                                                                                                                                                                                                           |                                          |                                                            |
| ug2059_2   | 444                  | GO:0009536                                                                                                                                                          |                                                                                                                                                                                                                                                                                           | plastid                                  |                                                            |
| ug2060     | 309                  |                                                                                                                                                                     |                                                                                                                                                                                                                                                                                           |                                          |                                                            |
| ug2061     | 296                  |                                                                                                                                                                     |                                                                                                                                                                                                                                                                                           |                                          |                                                            |
| ug2062     | 456                  |                                                                                                                                                                     |                                                                                                                                                                                                                                                                                           |                                          |                                                            |
| ug2063     | 396                  | GO:0016787,GO:0000166,GO:0009536,GO:0005886                                                                                                                         |                                                                                                                                                                                                                                                                                           | plastid                                  | hydrolase activity,nucleotide binding,transporter activity |
| ug2064     | 451                  | GO:0005886                                                                                                                                                          |                                                                                                                                                                                                                                                                                           | plasma membrane                          |                                                            |
| ug2065     | 385                  |                                                                                                                                                                     |                                                                                                                                                                                                                                                                                           |                                          |                                                            |
| ug2066     |                      | GO:0005515,GO:0007275,GO:0006464,GO:0019538,GO:0009056,GO:0009987,GO:0003824,GO:0005634,GO:000                                                                      | multicellular organismal development,protein modification process,protein metabolic process,catabolic process,cellular process                                                                                                                                                            | nucleus                                  | protein binding,catalytic activity,binding                 |



| Unigene ID | sequence length (bp) | GO-ID                                                                                                                                                                                                                | Biological process                                                                                                | Cellular component                                                | Molecular function                                       |
|------------|----------------------|----------------------------------------------------------------------------------------------------------------------------------------------------------------------------------------------------------------------|-------------------------------------------------------------------------------------------------------------------|-------------------------------------------------------------------|----------------------------------------------------------|
| ug2104_1   | 253                  |                                                                                                                                                                                                                      |                                                                                                                   |                                                                   |                                                          |
| ug2104_2   | 497                  | GO:0005488,GO:0006139,GO:0016740,GO:0030528,GO:0006350,GO:0005634                                                                                                                                                    | nucleobase, nucleoside, nucleotide and nucleic acid metabolic process                                             | mitochondrion                                                     | binding,transferase activity                             |
| ug2105_1   | 510                  |                                                                                                                                                                                                                      | transcription                                                                                                     | nucleus                                                           | transcription regulator activity                         |
| ug2105_2   | 433                  |                                                                                                                                                                                                                      |                                                                                                                   |                                                                   |                                                          |
| ug2106_1   | 530                  |                                                                                                                                                                                                                      |                                                                                                                   |                                                                   |                                                          |
| ug2106_2   | 556                  |                                                                                                                                                                                                                      |                                                                                                                   |                                                                   |                                                          |
| ug2107_1   | 420                  |                                                                                                                                                                                                                      |                                                                                                                   |                                                                   |                                                          |
| ug2107_2   | 476                  |                                                                                                                                                                                                                      |                                                                                                                   |                                                                   |                                                          |
| ug2108_1   | 420                  |                                                                                                                                                                                                                      |                                                                                                                   |                                                                   |                                                          |
| ug2108_2   | 562                  |                                                                                                                                                                                                                      |                                                                                                                   |                                                                   |                                                          |
| ug2109_1   | 423                  |                                                                                                                                                                                                                      |                                                                                                                   |                                                                   |                                                          |
| ug2109_2   | 538                  |                                                                                                                                                                                                                      |                                                                                                                   |                                                                   |                                                          |
| ug2110_1   | 425                  |                                                                                                                                                                                                                      |                                                                                                                   |                                                                   |                                                          |
| ug2110_2   | 525                  |                                                                                                                                                                                                                      |                                                                                                                   |                                                                   |                                                          |
| ug2111_1   | 431                  | GO:0008152,GO:0003824,GO:0016020,GO:000166,GO:0006139                                                                                                                                                                | metabolic process,nucleobase, nucleoside, nucleotide and nucleic acid metabolic process                           | membrane                                                          | catalytic activity,nucleotide binding                    |
| ug2111_2   | 494                  |                                                                                                                                                                                                                      |                                                                                                                   |                                                                   |                                                          |
| ug2112_1   | 420                  | GO:0009058,GO:000987,GO:0009536,GO:0009058,GO:000987,GO:0005488,GO:016043,GO:0009536,GO:0000166,GO:0008152,GO:0003824,GO:0005840,GO:0003824,GO:0005777,GO:0003674,GO:0000166,GO:0008152,GO:0009536,GO:0016020,GO:000 | biosynthetic process,cellular process                                                                             | plastid                                                           | structural molecule activity                             |
| ug2112_2   | 527                  |                                                                                                                                                                                                                      | biosynthetic process,cellular process,cellular component organization                                             | plastid                                                           | binding,structural molecule activity                     |
| ug2113_1   | 309                  |                                                                                                                                                                                                                      | metabolic process                                                                                                 |                                                                   | nucleotide binding,catalytic activity,molecular_function |
| ug2113_2   | 514                  |                                                                                                                                                                                                                      | metabolic process                                                                                                 | ribosome,peroxisome,plastid,membrane,nucleus,extracellular region | catalytic activity,molecular_function,nucleotide binding |
| ug2114_1   | 261                  |                                                                                                                                                                                                                      |                                                                                                                   |                                                                   |                                                          |
| ug2114_2   | 292                  |                                                                                                                                                                                                                      |                                                                                                                   |                                                                   |                                                          |
| ug2115_1   | 272                  |                                                                                                                                                                                                                      |                                                                                                                   |                                                                   |                                                          |
| ug2115_2   | 503                  |                                                                                                                                                                                                                      |                                                                                                                   |                                                                   |                                                          |
| ug2116_1   | 215                  |                                                                                                                                                                                                                      |                                                                                                                   |                                                                   |                                                          |
| ug2116_2   | 516                  | GO:0005794                                                                                                                                                                                                           |                                                                                                                   | Golgi apparatus                                                   |                                                          |
| ug2117_1   | 428                  | GO:0006950,GO:0009835,GO:0006350,GO:0003700,GO:0005634,GO:0007165,GO:0009710,GO:0006950,GO:0009835,GO:0006350,GO:0003700,GO:0005634,GO:0007165,GO:0009710                                                            | response to stress,ripening,transcription,signal transduction,response to endogenous stimulus                     | nucleus                                                           | transcription factor activity                            |
| ug2117_2   | 506                  |                                                                                                                                                                                                                      | stress,ripening,transcription,signal transduction,response to endogenous stimulus                                 | nucleus                                                           | transcription factor activity                            |
| ug2118_1   | 415                  |                                                                                                                                                                                                                      |                                                                                                                   |                                                                   |                                                          |
| ug2118_2   | 344                  |                                                                                                                                                                                                                      |                                                                                                                   |                                                                   |                                                          |
| ug2119_1   | 421                  |                                                                                                                                                                                                                      |                                                                                                                   |                                                                   |                                                          |
| ug2119_2   | 572                  |                                                                                                                                                                                                                      |                                                                                                                   |                                                                   |                                                          |
| ug2120_1   | 413                  |                                                                                                                                                                                                                      |                                                                                                                   |                                                                   |                                                          |
| ug2120_2   | 443                  |                                                                                                                                                                                                                      |                                                                                                                   |                                                                   |                                                          |
| ug2121_1   | 164                  |                                                                                                                                                                                                                      |                                                                                                                   |                                                                   |                                                          |
| ug2121_2   | 512                  | GO:0006091,GO:0016020,GO:0005739,GO:0003824,GO:0005215                                                                                                                                                               | generation of precursor metabolites and energy                                                                    | membrane,mitochondrion                                            | catalytic activity,transporter activity                  |
| ug2122_1   | 381                  |                                                                                                                                                                                                                      |                                                                                                                   |                                                                   |                                                          |
| ug2122_2   | 551                  | GO:0004872,GO:0008152,GO:0016787                                                                                                                                                                                     | metabolic process                                                                                                 |                                                                   | receptor activity,hydrolase activity                     |
| ug2123_1   | 427                  | GO:0008152,GO:0016787,GO:0009536                                                                                                                                                                                     | metabolic process                                                                                                 | plastid                                                           | hydrolase activity                                       |
| ug2123_2   | 563                  |                                                                                                                                                                                                                      | metabolic process                                                                                                 | plastid                                                           | hydrolase activity                                       |
| ug2124_1   | 397                  |                                                                                                                                                                                                                      |                                                                                                                   |                                                                   |                                                          |
| ug2124_2   | 598                  |                                                                                                                                                                                                                      |                                                                                                                   |                                                                   |                                                          |
| ug2125_1   | 433                  |                                                                                                                                                                                                                      |                                                                                                                   |                                                                   |                                                          |
| ug2125_2   | 492                  |                                                                                                                                                                                                                      |                                                                                                                   |                                                                   |                                                          |
| ug2126_1   | 401                  | GO:0006464,GO:0016301,GO:0000166                                                                                                                                                                                     | protein modification process                                                                                      |                                                                   | kinase activity,nucleotide binding                       |
| ug2126_2   | 518                  |                                                                                                                                                                                                                      | protein modification process                                                                                      |                                                                   | kinase activity,nucleotide binding                       |
| ug2127_1   | 402                  |                                                                                                                                                                                                                      |                                                                                                                   |                                                                   |                                                          |
| ug2127_2   | 543                  | GO:0009058,GO:0006519,GO:0016301                                                                                                                                                                                     | biosynthetic process,cellular amino acid and derivative metabolic response to abiotic stimulus,response to stress |                                                                   | kinase activity                                          |
| ug2128_1   | 427                  |                                                                                                                                                                                                                      |                                                                                                                   |                                                                   |                                                          |
| ug2128_2   | 507                  |                                                                                                                                                                                                                      |                                                                                                                   |                                                                   |                                                          |
| ug2129_1   | 413                  |                                                                                                                                                                                                                      |                                                                                                                   |                                                                   |                                                          |
| ug2129_2   | 627                  | GO:0005488,GO:0003824                                                                                                                                                                                                |                                                                                                                   |                                                                   | binding,nucleic acid binding                             |



| Unigene ID | sequence length (bp) | GO-ID                                                                                                                                                                                                                                                                                                                              | Biological process                                                                                                                                                                                                                                                                                                                                                            | Cellular component                                  | Molecular function                                                         |
|------------|----------------------|------------------------------------------------------------------------------------------------------------------------------------------------------------------------------------------------------------------------------------------------------------------------------------------------------------------------------------|-------------------------------------------------------------------------------------------------------------------------------------------------------------------------------------------------------------------------------------------------------------------------------------------------------------------------------------------------------------------------------|-----------------------------------------------------|----------------------------------------------------------------------------|
| ug2130_1   | 430                  | GO:0003723,GO:0016740,GO:0006139                                                                                                                                                                                                                                                                                                   | nucleobase, nucleoside, nucleotide and nucleic acid metabolic process                                                                                                                                                                                                                                                                                                         |                                                     | RNA binding,transferase activity                                           |
| ug2130_2   | 460                  | GO:0003723,GO:0016740,GO:0006139,GO:0                                                                                                                                                                                                                                                                                              | nucleobase, nucleoside, nucleotide and nucleic acid metabolic process                                                                                                                                                                                                                                                                                                         | plastid                                             | RNA binding,transferase activity                                           |
| ug2131_1   | 416                  |                                                                                                                                                                                                                                                                                                                                    |                                                                                                                                                                                                                                                                                                                                                                               |                                                     |                                                                            |
| ug2131_2   | 188                  |                                                                                                                                                                                                                                                                                                                                    |                                                                                                                                                                                                                                                                                                                                                                               |                                                     |                                                                            |
| ug2132_1   | 435                  |                                                                                                                                                                                                                                                                                                                                    |                                                                                                                                                                                                                                                                                                                                                                               |                                                     |                                                                            |
| ug2132_2   | 580                  |                                                                                                                                                                                                                                                                                                                                    |                                                                                                                                                                                                                                                                                                                                                                               |                                                     |                                                                            |
| ug2133_1   | 426                  | GO:0006139,GO:0009056,GO:0016787,GO:0005829                                                                                                                                                                                                                                                                                        | nucleobase, nucleoside, nucleotide and nucleic acid metabolic process,catabolic process                                                                                                                                                                                                                                                                                       | cytosol                                             | hydrolase activity                                                         |
| ug2133_2   | 520                  | GO:0006139,GO:0009056,GO:0016787,GO:0005829                                                                                                                                                                                                                                                                                        | nucleobase, nucleoside, nucleotide and nucleic acid metabolic process,catabolic process                                                                                                                                                                                                                                                                                       | cytosol                                             | hydrolase activity                                                         |
| ug2134_1   | 404                  | GO:0005737,GO:0016043,GO:0009987,GO:0005515,GO:0016049,GO:0005737,GO:0016                                                                                                                                                                                                                                                          | cellular component organization,cellular process,cell growth                                                                                                                                                                                                                                                                                                                  | cytoplasm,nucleus                                   | protein binding                                                            |
| ug2134_2   | 421                  | GO:0005737,GO:0016043,GO:0009987,GO:0005515,GO:0016049,GO                                                                                                                                                                                                                                                                          | cellular component organization,cellular process,cell growth                                                                                                                                                                                                                                                                                                                  | cytoplasm,nucleus                                   | protein binding                                                            |
| ug2135_1   | 446                  |                                                                                                                                                                                                                                                                                                                                    |                                                                                                                                                                                                                                                                                                                                                                               |                                                     |                                                                            |
| ug2135_2   | 529                  | GO:0005488                                                                                                                                                                                                                                                                                                                         |                                                                                                                                                                                                                                                                                                                                                                               |                                                     | binding                                                                    |
| ug2136_1   | 426                  |                                                                                                                                                                                                                                                                                                                                    |                                                                                                                                                                                                                                                                                                                                                                               |                                                     |                                                                            |
| ug2136_2   | 580                  |                                                                                                                                                                                                                                                                                                                                    |                                                                                                                                                                                                                                                                                                                                                                               |                                                     |                                                                            |
| ug2137_1   | 433                  | GO:0003824                                                                                                                                                                                                                                                                                                                         |                                                                                                                                                                                                                                                                                                                                                                               |                                                     | catalytic activity                                                         |
| ug2137_2   | 600                  | GO:0003824                                                                                                                                                                                                                                                                                                                         |                                                                                                                                                                                                                                                                                                                                                                               |                                                     | catalytic activity                                                         |
| ug2138_1   | 421                  | GO:0005576,GO:0000043,GO:0005618,GO:0016043,GO:0009987,GO:0009653,GO:0016049,GO:0005576,GO:0000000,GO:0004871,GO:0009                                                                                                                                                                                                              | reproduction cellular component organization,cellular process,anatomical structure morphogenesis,cell response to abiotic stimulus,tropism                                                                                                                                                                                                                                    | extracellular region cell wall,extracellular region |                                                                            |
| ug2138_2   | 547                  | GO:0005576,GO:0000000,GO:0004871,GO:0009                                                                                                                                                                                                                                                                                           | reproduction cellular component organization,cellular process,anatomical structure morphogenesis,cell response to abiotic stimulus,tropism                                                                                                                                                                                                                                    | extracellular region cell wall,extracellular region |                                                                            |
| ug2139_1   | 414                  | GO:0005634,GO:0005515,GO:0004871,GO:0009                                                                                                                                                                                                                                                                                           | response to abiotic stimulus,tropism                                                                                                                                                                                                                                                                                                                                          | nucleus                                             | signal transducer activity,protein binding                                 |
| ug2139_2   | 602                  | GO:0005634,GO:0005515,GO:0004871,GO:0009                                                                                                                                                                                                                                                                                           | response to abiotic stimulus,tropism                                                                                                                                                                                                                                                                                                                                          | nucleus                                             | signal transducer activity,protein binding                                 |
| ug2140_1   | 430                  |                                                                                                                                                                                                                                                                                                                                    |                                                                                                                                                                                                                                                                                                                                                                               |                                                     |                                                                            |
| ug2140_2   | 495                  |                                                                                                                                                                                                                                                                                                                                    |                                                                                                                                                                                                                                                                                                                                                                               |                                                     |                                                                            |
| ug2141_1   | 413                  | GO:0003674,GO:0009058,GO:0009987,GO:0006629,GO:0003824,GO:0005488,GO:0009628,GO:0008152,GO:0006519,GO:0019748,GO:0016020,GO:0005576,GO:0009058,GO:0009987,GO:0006629,GO:0003824,GO:0009628,GO:0005488,GO:0008152,GO:0006519,GO:0019748,GO:0016020,GO:                                                                              | biosynthetic process,cellular process,lipid metabolic process,response to abiotic stimulus,metabolic process,cellular amino acid and derivative metabolic process,secondary metabolic process biosynthetic process,cellular process,lipid metabolic process,response to abiotic stimulus,metabolic process,cellular amino acid and derivative metabolic process,secondary     | membrane,extracellular region,endoplasmic reticulum | molecular_function,catalytic activity,protein binding                      |
| ug2141_2   | 523                  | GO:0003674,GO:0009058,GO:0009987,GO:0006629,GO:0003824,GO:0009628,GO:0005488,GO:0008152,GO:0006519,GO:0019748,GO:0016020,GO:                                                                                                                                                                                                       | biosynthetic process,cellular process,lipid metabolic process,response to abiotic stimulus,metabolic process,cellular amino acid and derivative metabolic process,secondary                                                                                                                                                                                                   | membrane,endoplasmic reticulum                      | catalytic activity,protein binding                                         |
| ug2142_1   | 423                  |                                                                                                                                                                                                                                                                                                                                    |                                                                                                                                                                                                                                                                                                                                                                               |                                                     |                                                                            |
| ug2142_2   | 507                  |                                                                                                                                                                                                                                                                                                                                    |                                                                                                                                                                                                                                                                                                                                                                               |                                                     |                                                                            |
| ug2143_1   | 407                  | GO:0003824,GO:0005488,GO:0009058,GO:0009987,GO:0009628,GO:0009791,GO:0008152,GO:0009056,GO:0006519,GO:0016787,GO:0005739,GO:0016740,GO:0003824,GO:0005488,GO:0009058,GO:0009987,GO:0009628,GO:0009791,GO:0008152,GO:0009056,GO:0006519,GO:0016787,GO:0005739,GO:0016740,GO:0003824,GO:0005488,GO:0009058,GO:0009987,GO:0009628,GO: | biosynthetic process,cellular process,response to abiotic stimulus,post-embryonic development,metabolic process,catabolic process,cellular amino acid and derivative metabolic process biosynthetic process,cellular process,response to abiotic stimulus,post-embryonic development,metabolic process,catabolic process,cellular amino acid and derivative metabolic process | mitochondrion,membrane,nucleus                      | catalytic activity,protein binding,hydrolase activity,transferase activity |
| ug2143_2   | 597                  | GO:0009791,GO:0008152,GO:0009056,GO:0006519,GO:0016787,GO:0005739,GO:0016740,GO:0003824,GO:0005488,GO:0009058,GO:0009987,GO:0009628,GO:                                                                                                                                                                                            | development,metabolic process,catabolic process,cellular amino acid and derivative metabolic process biosynthetic process,cellular process,response to abiotic stimulus,post-embryonic development,metabolic process,catabolic process,cellular amino acid and derivative metabolic process                                                                                   | mitochondrion,nucleus                               | catalytic activity,protein binding,hydrolase activity,transferase activity |
| ug2144_1   | 391                  |                                                                                                                                                                                                                                                                                                                                    |                                                                                                                                                                                                                                                                                                                                                                               |                                                     |                                                                            |
| ug2144_2   | 575                  | GO:0005739                                                                                                                                                                                                                                                                                                                         |                                                                                                                                                                                                                                                                                                                                                                               | mitochondrion                                       |                                                                            |
| ug2145_1   | 419                  | GO:0006810,GO:0009987,GO:0016020,GO:0016043,GO:0005515,GO:0006810,GO:0009                                                                                                                                                                                                                                                          | transport,cellular process,cellular component organization                                                                                                                                                                                                                                                                                                                    | membrane                                            | protein binding                                                            |
| ug2145_2   | 539                  | GO:0006810,GO:0009987,GO:0016020,GO:0016043,GO:0005515,GO:0007165,GO:0006629,GO:0016787                                                                                                                                                                                                                                            | transport,cellular process,cellular component organization signal transduction,lipid metabolic process                                                                                                                                                                                                                                                                        | membrane                                            | protein binding                                                            |
| ug2146_1   | 378                  | GO:0007165,GO:0006629,GO:0016787                                                                                                                                                                                                                                                                                                   | signal transduction,lipid metabolic process                                                                                                                                                                                                                                                                                                                                   |                                                     | hydrolase activity                                                         |
| ug2146_2   | 444                  |                                                                                                                                                                                                                                                                                                                                    |                                                                                                                                                                                                                                                                                                                                                                               |                                                     |                                                                            |
| ug2147_1   | 408                  |                                                                                                                                                                                                                                                                                                                                    |                                                                                                                                                                                                                                                                                                                                                                               |                                                     |                                                                            |

| Unigene ID | sequence length (bp) | GO-ID                                                                        | Biological process                                                           | Cellular component               | Molecular function                                        |
|------------|----------------------|------------------------------------------------------------------------------|------------------------------------------------------------------------------|----------------------------------|-----------------------------------------------------------|
| ug2147_2   | 593                  | GO:0016043,GO:0009987,GO:0005856,GO:0005515,GO:0000166,GO:0005737,GO:000563  | cellular component organization,cellular process                             | cytoskeleton,cytoplasm,nucleus   | protein binding,nucleotide binding                        |
| ug2148_1   | 126                  |                                                                              |                                                                              |                                  |                                                           |
| ug2148_2   | 583                  | GO:0016020                                                                   |                                                                              | membrane                         |                                                           |
| ug2149_1   | 439                  |                                                                              |                                                                              |                                  |                                                           |
| ug2149_2   | 557                  |                                                                              |                                                                              |                                  |                                                           |
| ug2150_1   | 356                  |                                                                              |                                                                              |                                  |                                                           |
| ug2150_2   | 386                  | GO:0003700,GO:0005634,GO:0006350                                             | transcription                                                                | nucleus                          | transcription factor activity                             |
| ug2151_1   | 456                  | GO:0003824,GO:0008152,GO:0006519,GO:0003824,GO:0008152,GO:0006519,GO:000     | metabolic process,cellular amino acid and derivative metabolic               |                                  | catalytic activity,binding                                |
| ug2151_2   | 558                  | GO:0003824,GO:0008152,GO:0006519,GO:000                                      | metabolic process,cellular amino acid and derivative metabolic               |                                  | catalytic activity,binding                                |
| ug2152_1   | 277                  |                                                                              |                                                                              |                                  |                                                           |
| ug2152_2   | 498                  | GO:0009536                                                                   |                                                                              | plastid                          |                                                           |
| ug2153_1   | 322                  |                                                                              |                                                                              |                                  |                                                           |
| ug2153_2   | 617                  |                                                                              |                                                                              |                                  |                                                           |
| ug2154_1   | 428                  |                                                                              |                                                                              |                                  |                                                           |
| ug2154_2   | 498                  |                                                                              |                                                                              |                                  |                                                           |
| ug2155_1   | 299                  | GO:0005515                                                                   |                                                                              |                                  | protein binding                                           |
| ug2155_2   | 450                  |                                                                              |                                                                              |                                  |                                                           |
| ug2156_1   | 493                  | GO:0005773,GO:0006810,GO:0005215,GO:0005773,GO:0006810,GO:0005215,GO:0016020 | transport                                                                    | vacuole,membrane                 | transporter activity                                      |
| ug2156_2   | 372                  | 810,GO:0005886,GO:0005215,GO:0016020                                         | transport                                                                    | vacuole,plasma membrane,membrane | transporter activity                                      |
| ug2157_1   | 527                  | GO:0016787,GO:0019538,GO:0009056                                             | protein metabolic process,catabolic process                                  |                                  | hydrolase activity                                        |
| ug2157_2   | 382                  | GO:0016787,GO:0005737,GO:0019538,GO:000                                      | protein metabolic process,catabolic process                                  | cytoplasm                        | hydrolase activity                                        |
| ug2158_1   | 523                  |                                                                              |                                                                              |                                  |                                                           |
| ug2158_2   | 117                  |                                                                              |                                                                              |                                  |                                                           |
| ug2159_1   | 498                  | GO:0005737,GO:0006464,GO:0005515                                             | protein modification process                                                 | cytoplasm                        | protein binding                                           |
| ug2159_2   | 391                  |                                                                              |                                                                              |                                  |                                                           |
| ug2160_1   | 498                  | GO:0005515                                                                   |                                                                              |                                  | protein binding                                           |
| ug2160_2   | 395                  | GO:0005515                                                                   |                                                                              |                                  | protein binding                                           |
| ug2161_1   | 515                  |                                                                              |                                                                              |                                  |                                                           |
| ug2161_2   | 376                  | GO:0003677,GO:0003700,GO:0005634,GO:000                                      | transcription                                                                | nucleus                          | DNA binding,transcription factor activity                 |
| ug2162_1   | 473                  |                                                                              |                                                                              |                                  |                                                           |
| ug2162_2   | 392                  | GO:0016020,GO:0016740,GO:0009058,GO:0009987,GO:0006629,GO:0005737,GO:0006    | biosynthetic process,cellular process,lipid metabolic process                | membrane                         | transferase activity                                      |
| ug2163_1   | 500                  | 412,GO:0008135,GO:0005634,GO:0005488,GO:0005737,GO:0006                      | translation                                                                  | cytoplasm,nucleus                | translation factor activity, nucleic acid binding,binding |
| ug2163_2   | 355                  | 412,GO:0008135,GO:0005634,GO:0005488                                         | translation                                                                  | cytoplasm,nucleus                | translation factor activity, nucleic acid binding,binding |
| ug2164_1   | 484                  |                                                                              |                                                                              |                                  |                                                           |
| ug2164_2   | 504                  |                                                                              |                                                                              |                                  |                                                           |
| ug2165_1   | 259                  |                                                                              |                                                                              |                                  |                                                           |
| ug2165_2   | 423                  |                                                                              |                                                                              |                                  |                                                           |
| ug2166_1   | 423                  | GO:0008289                                                                   |                                                                              |                                  | lipid binding                                             |
| ug2166_2   | 529                  | GO:0008289                                                                   |                                                                              |                                  | lipid binding                                             |
| ug2167_1   | 279                  |                                                                              |                                                                              |                                  |                                                           |
| ug2167_2   | 468                  | GO:0016020,GO:0006519,GO:0006629,GO:0005488,GO:0016787                       | cellular amino acid and derivative metabolic process,lipid metabolic process | membrane                         | binding,hydrolase activity                                |
| ug2168_1   | 427                  |                                                                              |                                                                              |                                  |                                                           |
| ug2168_2   | 542                  | GO:0005737                                                                   |                                                                              | cytoplasm                        |                                                           |
| ug2169_1   | 372                  | GO:0005488,GO:0008152,GO:0003824,GO:000                                      | metabolic process                                                            |                                  | binding,catalytic activity,molecular_function             |
| ug2169_2   | 148                  |                                                                              |                                                                              |                                  |                                                           |
| ug2170_1   | 470                  | GO:0003677,GO:0003700,GO:0005634,GO:000                                      | transcription                                                                | nucleus                          | DNA binding,transcription factor activity                 |
| ug2170_2   | 587                  | GO:0003677,GO:0006                                                           | transcription                                                                |                                  | DNA binding                                               |
| ug2171_1   | 437                  |                                                                              |                                                                              |                                  |                                                           |
| ug2171_2   | 546                  |                                                                              |                                                                              |                                  |                                                           |
| ug2172_1   | 123                  |                                                                              |                                                                              |                                  |                                                           |
| ug2172_2   | 487                  |                                                                              |                                                                              |                                  |                                                           |
| ug2173_1   | 409                  | GO:0005488,GO:0006519,GO:0003824                                             | cellular amino acid and derivative metabolic process                         |                                  | binding,catalytic activity                                |
| ug2173_2   | 460                  |                                                                              |                                                                              |                                  |                                                           |
| ug2174_1   | 433                  |                                                                              |                                                                              |                                  |                                                           |
| ug2174_2   | 396                  |                                                                              |                                                                              |                                  |                                                           |
| ug2175_1   | 239                  |                                                                              |                                                                              |                                  |                                                           |

| Unigene ID | sequence length (bp) | GO-ID                                                                       | Biological process                                                                        | Cellular component              | Molecular function                                                     |
|------------|----------------------|-----------------------------------------------------------------------------|-------------------------------------------------------------------------------------------|---------------------------------|------------------------------------------------------------------------|
| ug2175_2   | 578                  |                                                                             |                                                                                           |                                 |                                                                        |
| ug2176_1   | 443                  |                                                                             |                                                                                           |                                 |                                                                        |
| ug2176_2   | 597                  | GO:0003677,GO:000515,GO:0003700,GO:0005634,GO:0006350                       | transcription                                                                             | nucleus                         | DNA binding,protein binding,transcription factor activity              |
| ug2177_1   | 514                  | GO:0016301,GO:0004871,GO:0006464,GO:000166,GO:0007165,GO:0016301,GO:0004    | protein modification process,signal transduction                                          | mitochondrion                   | kinase activity,signal transducer activity,nucleotide binding          |
| ug2177_2   | 546                  | GO:0016301,GO:0004871,GO:0006464,GO:000166,GO:0007165                       | protein modification process,signal transduction                                          |                                 | kinase activity,signal transducer activity,nucleotide binding          |
| ug2178_1   | 464                  |                                                                             |                                                                                           |                                 |                                                                        |
| ug2178_2   | 605                  |                                                                             |                                                                                           |                                 |                                                                        |
| ug2179_1   | 255                  |                                                                             |                                                                                           |                                 |                                                                        |
| ug2179_2   | 247                  |                                                                             |                                                                                           |                                 |                                                                        |
| ug2180_1   | 401                  |                                                                             |                                                                                           |                                 |                                                                        |
| ug2180_2   | 549                  | GO:0005488,GO:0019538,GO:0009056,GO:0009987,GO:0006464,GO:0003824,GO:000562 | protein metabolic process,catabolic process,cellular process,protein modification process | intracellular                   | binding,catalytic activity                                             |
| ug2181_1   | 350                  |                                                                             |                                                                                           |                                 |                                                                        |
| ug2181_2   | 488                  | GO:0003677,GO:000515,GO:0003700,GO:0005634,GO:0006350                       | transcription                                                                             | nucleus                         | DNA binding,protein binding,transcription factor activity              |
| ug2182_1   | 106                  |                                                                             |                                                                                           |                                 |                                                                        |
| ug2182_2   | 494                  | GO:0005488,GO:0008150,GO:0006950,GO:0                                       | biological_process,response to stress                                                     |                                 | binding,protein binding                                                |
| ug2183_1   | 243                  |                                                                             |                                                                                           |                                 |                                                                        |
| ug2183_2   | 544                  | GO:0005773                                                                  |                                                                                           | vacuole                         |                                                                        |
| ug2184_1   | 417                  | GO:0005488,GO:0016787,GO:0006412,GO:0009536,GO:0005739                      | translation                                                                               | plastid,mitochondrion           | binding,hydrolase activity                                             |
| ug2184_2   | 575                  | GO:0006464,GO:0005618,GO:0005488,GO:0016787,GO:0009536,GO:0006412,GO:000573 | protein modification process,translation                                                  | cell wall,plastid,mitochondrion | binding,hydrolase activity                                             |
| ug2185_1   | 598                  |                                                                             |                                                                                           |                                 |                                                                        |
| ug2185_2   | 549                  |                                                                             |                                                                                           |                                 |                                                                        |
| ug2186_1   | 608                  | GO:0005739,GO:0005                                                          |                                                                                           | mitochondrion,endoplasmic       |                                                                        |
| ug2186_2   | 574                  | GO:0005739,GO:0005                                                          |                                                                                           | mitochondrion,endoplasmic       |                                                                        |
| ug2187_1   | 637                  | GO:0008152,GO:0003                                                          | metabolic process                                                                         |                                 | catalytic activity                                                     |
| ug2187_2   | 566                  |                                                                             |                                                                                           |                                 |                                                                        |
| ug2188_1   | 609                  | GO:0016740,GO:0008                                                          | metabolic process                                                                         |                                 | transferase activity                                                   |
| ug2188_2   | 191                  |                                                                             |                                                                                           |                                 |                                                                        |
| ug2189_1   | 597                  | GO:0003824,GO:0005                                                          |                                                                                           |                                 | catalytic activity,protein binding                                     |
| ug2189_2   | 552                  | GO:0003824,GO:0005                                                          |                                                                                           |                                 | catalytic activity,protein binding                                     |
| ug2190_1   | 535                  | GO:0008152,GO:0003824,GO:0005488                                            | metabolic process                                                                         |                                 | catalytic activity,protein binding                                     |
| ug2190_2   | 376                  | GO:0008152,GO:0003824,GO:0005488                                            | metabolic process                                                                         |                                 | catalytic activity,protein binding                                     |
| ug2191_1   | 497                  | GO:0005622,GO:0000166,GO:0007165                                            | signal transduction                                                                       | intracellular                   | nucleotide binding                                                     |
| ug2191_2   | 407                  |                                                                             |                                                                                           |                                 |                                                                        |
| ug2192_1   | 474                  |                                                                             |                                                                                           |                                 |                                                                        |
| ug2192_2   | 421                  | GO:0016020                                                                  |                                                                                           | membrane                        |                                                                        |
| ug2193_1   | 467                  |                                                                             |                                                                                           |                                 |                                                                        |
| ug2193_2   | 375                  |                                                                             |                                                                                           |                                 |                                                                        |
| ug2194_1   | 442                  |                                                                             |                                                                                           |                                 |                                                                        |
| ug2194_2   | 345                  | GO:0005515                                                                  |                                                                                           |                                 | protein binding                                                        |
| ug2195_1   | 519                  | GO:0005654,GO:0030528,GO:0016043,GO:0006350,GO:0000166,G                    | cellular component organization,transcription                                             | nucleoplasm                     | transcription regulator activity,nucleotide binding,catalytic activity |
| ug2195_2   | 399                  |                                                                             |                                                                                           |                                 |                                                                        |
| ug2196_1   | 476                  |                                                                             |                                                                                           |                                 |                                                                        |
| ug2196_2   | 396                  |                                                                             |                                                                                           |                                 |                                                                        |
| ug2197_1   | 447                  | GO:0003723,GO:0008152,GO:0003824,GO:0016740,GO:0000166,GO:0006259,GO:000905 | metabolic process,DNA metabolic process,biosynthetic process                              |                                 | RNA binding,catalytic activity,transferase activity,nucleotide binding |
| ug2197_2   | 412                  | GO:0008152,GO:0003676,GO:0003824,GO:0003824,GO:0019                         | metabolic process                                                                         |                                 | nucleic acid binding,catalytic activity,nucleotide binding             |
| ug2198_1   | 599                  | GO:0005488,GO:0009056,GO:0009987,GO:0005515                                 | protein metabolic process,catabolic process,cellular process                              |                                 | catalytic activity,protein binding                                     |
| ug2198_2   | 394                  | GO:0003824,GO:0005739,GO:0003723,GO:0005                                    |                                                                                           | mitochondrion                   | catalytic activity                                                     |
| ug2199_1   | 488                  | GO:0006412,GO:0005739,GO:0005634,GO:0000166                                 | nucleobase, nucleoside, nucleotide and nucleic acid metabolic process                     | cytoplasm,nucleus               | RNA binding,nucleotide binding                                         |
| ug2199_2   | 262                  |                                                                             |                                                                                           |                                 |                                                                        |
| ug2200_1   | 488                  |                                                                             |                                                                                           |                                 |                                                                        |

| Unigene ID | sequence length (bp) | GO-ID                                                                        | Biological process                                                                                                     | Cellular component            | Molecular function                               |
|------------|----------------------|------------------------------------------------------------------------------|------------------------------------------------------------------------------------------------------------------------|-------------------------------|--------------------------------------------------|
| ug2200_2   | 434                  |                                                                              |                                                                                                                        |                               |                                                  |
| ug2201_1   | 415                  | GO:0005515                                                                   |                                                                                                                        |                               | protein binding                                  |
| ug2201_2   | 427                  |                                                                              |                                                                                                                        |                               |                                                  |
| ug2202_1   | 427                  | GO:0005783,GO:0006810,GO:0009987                                             | transport,cellular process                                                                                             | endoplasmic reticulum         |                                                  |
| ug2202_2   | 445                  | GO:0005783,GO:0006810,GO:0009987                                             | transport,cellular process                                                                                             | endoplasmic reticulum         |                                                  |
| ug2203_1   | 561                  | GO:0009536                                                                   |                                                                                                                        | plastid                       |                                                  |
| ug2203_2   | 463                  |                                                                              |                                                                                                                        |                               |                                                  |
| ug2204_1   | 568                  | GO:0005488,GO:0008152,GO:0003824,GO:0005488                                  | metabolic process                                                                                                      |                               | binding,catalytic activity,molecular_function    |
| ug2204_2   | 468                  | GO:0003824,GO:0005488                                                        |                                                                                                                        |                               | catalytic activity,binding                       |
| ug2205_1   | 550                  | GO:0005488,GO:0008152,GO:0003824                                             | metabolic process                                                                                                      |                               | binding,catalytic activity                       |
| ug2205_2   | 459                  |                                                                              |                                                                                                                        |                               |                                                  |
| ug2206_1   | 524                  | GO:0006412,GO:0008135,GO:0016020                                             | translation                                                                                                            | membrane                      | translation factor activity,nucleic acid binding |
| ug2206_2   | 461                  | GO:0005488                                                                   |                                                                                                                        |                               | binding                                          |
| ug2207_1   | 495                  |                                                                              |                                                                                                                        |                               |                                                  |
| ug2207_2   | 454                  | GO:0003824,GO:0009536,GO:0009058,GO:0005488                                  | biosynthetic process,cellular process                                                                                  | plastid                       | catalytic activity                               |
| ug2208_1   | 449                  | GO:0005634,GO:0005488                                                        |                                                                                                                        | nucleus,mitochondrion         |                                                  |
| ug2208_2   | 483                  | GO:0005634,GO:0005488                                                        |                                                                                                                        | nucleus,mitochondrion         |                                                  |
| ug2209_1   | 447                  |                                                                              |                                                                                                                        |                               |                                                  |
| ug2209_2   | 441                  | GO:0005488                                                                   |                                                                                                                        |                               | binding                                          |
| ug2210_1   | 440                  | GO:0007165,GO:0005794,GO:0005515                                             | signal transduction                                                                                                    | Golgi apparatus               | protein binding                                  |
| ug2210_2   | 482                  | GO:0007165,GO:0005794,GO:0005515                                             | signal transduction                                                                                                    | Golgi apparatus               | protein binding                                  |
| ug2211_1   | 427                  |                                                                              |                                                                                                                        |                               |                                                  |
| ug2211_2   | 468                  | GO:0003677                                                                   |                                                                                                                        |                               | DNA binding                                      |
| ug2212_1   | 461                  |                                                                              |                                                                                                                        |                               |                                                  |
| ug2212_2   | 190                  |                                                                              |                                                                                                                        |                               |                                                  |
| ug2213_1   | 473                  | GO:0003824,GO:0008152                                                        | metabolic process                                                                                                      |                               | catalytic activity                               |
| ug2213_2   | 460                  | GO:0003824,GO:0008152                                                        | metabolic process                                                                                                      |                               | catalytic activity                               |
| ug2214_1   | 458                  | GO:0005488,GO:0016740,GO:0005515                                             |                                                                                                                        |                               | binding,transferase activity,protein binding     |
| ug2214_2   | 493                  | GO:0005488,GO:0005488                                                        |                                                                                                                        |                               | binding,protein binding                          |
| ug2215_1   | 454                  |                                                                              |                                                                                                                        |                               |                                                  |
| ug2215_2   | 470                  |                                                                              |                                                                                                                        |                               |                                                  |
| ug2216_1   | 474                  |                                                                              |                                                                                                                        |                               |                                                  |
| ug2216_2   | 440                  |                                                                              |                                                                                                                        |                               |                                                  |
| ug2217_1   | 430                  |                                                                              |                                                                                                                        |                               |                                                  |
| ug2217_2   | 397                  |                                                                              |                                                                                                                        |                               |                                                  |
| ug2218_1   | 450                  |                                                                              |                                                                                                                        |                               |                                                  |
| ug2218_2   | 454                  |                                                                              |                                                                                                                        |                               |                                                  |
| ug2219_1   | 598                  | GO:0009056,GO:0006519,GO:0016740,GO:0005488                                  | catabolic process,cellular amino acid and derivative metabolic                                                         | plastid                       | transferase activity                             |
| ug2219_2   | 469                  |                                                                              |                                                                                                                        |                               |                                                  |
| ug2220_1   | 530                  | GO:0009790,GO:0009908,GO:0006350                                             | embryonic development,flower development,transcription                                                                 |                               |                                                  |
| ug2220_2   | 431                  |                                                                              |                                                                                                                        |                               |                                                  |
| ug2221_1   | 433                  |                                                                              |                                                                                                                        |                               |                                                  |
| ug2221_2   | 404                  |                                                                              |                                                                                                                        |                               |                                                  |
| ug2222_1   | 322                  |                                                                              |                                                                                                                        |                               |                                                  |
| ug2222_2   | 443                  | GO:0006810,GO:0016020,GO:0005215                                             | transport                                                                                                              | membrane                      | transporter activity                             |
| ug2223_1   | 412                  | GO:0003824,GO:0005886,GO:0006519,GO:0008152,GO:000166,GO:0006950,GO:000962   | cellular amino acid and derivative metabolic process,metabolic process,response to stress,response to abiotic stimulus | plasma membrane,mitochondrion | catalytic activity,nucleotide binding            |
| ug2223_2   | 483                  | GO:0003824,GO:0005886,GO:0006519,GO:0008152,GO:000166,GO:0006950,GO:000962   | cellular amino acid and derivative metabolic process,metabolic process,response to stress,response to abiotic stimulus | plasma membrane,mitochondrion | catalytic activity,nucleotide binding            |
| ug2224_1   | 407                  | GO:0006950,GO:0003824,GO:0008152,GO:0005488                                  | response to stress,metabolic process                                                                                   | plastid                       | catalytic activity                               |
| ug2224_2   | 373                  |                                                                              |                                                                                                                        |                               |                                                  |
| ug2225_1   | 428                  |                                                                              |                                                                                                                        |                               |                                                  |
| ug2225_2   | 537                  |                                                                              |                                                                                                                        |                               |                                                  |
| ug2226_1   | 506                  | GO:0006950,GO:0009628,GO:0009987,GO:0006810,GO:0005623,GO:0005488,GO:0005515 | response to stress,response to abiotic stimulus,cellular process,transport                                             | cell,plasma membrane          | binding,protein binding                          |
| ug2226_2   | 200                  |                                                                              |                                                                                                                        |                               |                                                  |
| ug2227_1   | 475                  |                                                                              |                                                                                                                        |                               |                                                  |
| ug2227_2   | 432                  |                                                                              |                                                                                                                        |                               |                                                  |
| ug2228_1   | 479                  |                                                                              |                                                                                                                        |                               |                                                  |
| ug2228_2   | 411                  |                                                                              |                                                                                                                        |                               |                                                  |

| Unigene ID | sequence length (bp) | GO-ID                                                                        | Biological process                                                                                                                                        | Cellular component             | Molecular function                                                                    |
|------------|----------------------|------------------------------------------------------------------------------|-----------------------------------------------------------------------------------------------------------------------------------------------------------|--------------------------------|---------------------------------------------------------------------------------------|
| ug2229_1   | 464                  | GO:0006810,GO:0009987,GO:0005215                                             | transport,cellular process                                                                                                                                |                                | transporter activity                                                                  |
| ug2229_2   | 267                  |                                                                              |                                                                                                                                                           |                                |                                                                                       |
| ug2230_1   | 426                  |                                                                              |                                                                                                                                                           |                                |                                                                                       |
| ug2230_2   | 457                  |                                                                              |                                                                                                                                                           |                                |                                                                                       |
| ug2231_1   | 494                  | GO:0005975,GO:0006950,GO:0005576,GO:0016787,GO:0005488                       | carbohydrate metabolic process,response to stress                                                                                                         | extracellular region           | hydrolase activity,binding                                                            |
| ug2231_2   | 432                  | GO:0005975,GO:0016787,GO:0005488                                             | carbohydrate metabolic process                                                                                                                            |                                | hydrolase activity,binding                                                            |
| ug2232_1   | 502                  | GO:0006810,GO:0005259                                                        | transport                                                                                                                                                 |                                | binding                                                                               |
| ug2232_2   | 259                  |                                                                              |                                                                                                                                                           |                                |                                                                                       |
| ug2233_1   | 412                  |                                                                              |                                                                                                                                                           |                                |                                                                                       |
| ug2233_2   | 413                  |                                                                              |                                                                                                                                                           |                                |                                                                                       |
| ug2234_1   | 447                  | GO:0005488,GO:0003824,GO:0009058,GO:000444                                   | biosynthetic process                                                                                                                                      |                                | binding,catalytic activity,transferase activity                                       |
| ug2234_2   | 444                  |                                                                              |                                                                                                                                                           |                                |                                                                                       |
| ug2235_1   | 435                  |                                                                              |                                                                                                                                                           |                                |                                                                                       |
| ug2235_2   | 447                  |                                                                              |                                                                                                                                                           |                                |                                                                                       |
| ug2236_1   | 481                  | GO:0005783                                                                   |                                                                                                                                                           | endoplasmic reticulum          |                                                                                       |
| ug2236_2   | 444                  | GO:0016020,GO:0005056,GO:0019538,GO:0009056,GO:0009987,GO:0006464,GO:0003824 | protein metabolic process,catabolic process,cellular process,protein modification process                                                                 | membrane,endoplasmic reticulum | catalytic activity                                                                    |
| ug2237_1   | 483                  | GO:0019538,GO:0009056,GO:0009987,GO:0006464,GO:0003824                       | protein metabolic process,catabolic process,cellular process,protein modification process                                                                 |                                | catalytic activity                                                                    |
| ug2237_2   | 354                  | GO:0019538,GO:0009056,GO:0009987,GO:0003824,GO:0006464                       | protein metabolic process,catabolic process,cellular process,protein modification process                                                                 |                                | catalytic activity                                                                    |
| ug2238_1   | 430                  |                                                                              |                                                                                                                                                           |                                |                                                                                       |
| ug2238_2   | 461                  |                                                                              |                                                                                                                                                           |                                |                                                                                       |
| ug2239_1   | 387                  |                                                                              |                                                                                                                                                           |                                |                                                                                       |
| ug2239_2   | 378                  |                                                                              |                                                                                                                                                           |                                |                                                                                       |
| ug2240_1   | 870                  |                                                                              |                                                                                                                                                           |                                |                                                                                       |
| ug2240_2   | 395                  | GO:0005488,GO:0008152,GO:0003824,GO:000563                                   | metabolic process                                                                                                                                         |                                | binding,catalytic activity,molecular_function                                         |
| ug2241_1   | 563                  |                                                                              |                                                                                                                                                           |                                |                                                                                       |
| ug2241_2   | 492                  | GO:0005634,GO:0003676,GO:0005622,GO:0005215,GO:0009056                       |                                                                                                                                                           | nucleus,intracellular          | nucleic acid binding                                                                  |
| ug2242_1   | 864                  | GO:0006810,GO:0009536,GO:0016020,GO:0005737                                  | response to biotic stimulus,transport                                                                                                                     | plastid,membrane,mitochondrion | transporter activity                                                                  |
| ug2242_2   | 855                  | GO:0005737                                                                   |                                                                                                                                                           | cytoplasm                      |                                                                                       |
| ug2243_1   | 591                  |                                                                              |                                                                                                                                                           |                                |                                                                                       |
| ug2243_2   | 466                  | GO:0005488,GO:0008152,GO:0003824,GO:0003674,GO:0005757                       | metabolic process                                                                                                                                         | endoplasmic reticulum          | binding,catalytic activity,molecular_function,oxygen binding                          |
| ug2244_1   | 757                  |                                                                              |                                                                                                                                                           |                                |                                                                                       |
| ug2244_2   | 944                  |                                                                              |                                                                                                                                                           |                                |                                                                                       |
| ug2245_1   | 100                  |                                                                              |                                                                                                                                                           |                                |                                                                                       |
| ug2245_2   | 851                  | GO:0009536                                                                   |                                                                                                                                                           | plastid                        |                                                                                       |
| ug2246_1   | 150                  |                                                                              |                                                                                                                                                           |                                |                                                                                       |
| ug2246_2   | 342                  |                                                                              |                                                                                                                                                           |                                |                                                                                       |
| ug2247_1   | 668                  |                                                                              |                                                                                                                                                           |                                |                                                                                       |
| ug2247_2   | 482                  |                                                                              |                                                                                                                                                           |                                |                                                                                       |
| ug2248_1   | 285                  |                                                                              |                                                                                                                                                           |                                |                                                                                       |
| ug2248_2   | 828                  | GO:0005623,GO:0006950,GO:0009058,GO:0006519,GO:0019748                       | response to stress,biosynthetic process,cellular amino acid and derivative metabolic process,secondary metabolic process                                  | cell                           |                                                                                       |
| ug2249_1   | 295                  |                                                                              |                                                                                                                                                           |                                |                                                                                       |
| ug2249_2   | 716                  | GO:0005840,GO:0005198,GO:0006412                                             | translation                                                                                                                                               | ribosome                       | structural molecule activity                                                          |
| ug2250_1   | 192                  |                                                                              |                                                                                                                                                           |                                |                                                                                       |
| ug2250_2   | 282                  |                                                                              |                                                                                                                                                           |                                |                                                                                       |
| ug2251_1   | 138                  |                                                                              |                                                                                                                                                           |                                |                                                                                       |
| ug2251_2   | 308                  | GO:0008150,GO:0000166,GO:0005829,GO:0006139,GO:0006412,GO:0006519,GO:0003824 | biological_process,nucleobase, nucleoside, nucleotide and nucleic acid metabolic process,translation,cellular amino acid and derivative metabolic process | cytosol                        | nucleotide binding,catalytic activity                                                 |
| ug2252_1   | 113                  | GO:0005622,GO:0003723,GO:0005515                                             |                                                                                                                                                           | intracellular                  | RNA binding,protein binding                                                           |
| ug2252_2   | 167                  | GO:0016787,GO:0005975,GO:0016043,GO:0009987                                  | carbohydrate metabolic process,cellular component organization,cellular process                                                                           |                                | hydrolase activity                                                                    |
| ug2253_1   | 712                  | GO:0005623,GO:000488,GO:0003676,GO:0008152,GO:0003824,GO:0003674,GO:000016   | metabolic process,response to stress                                                                                                                      | cell                           | binding,nucleic acid binding,catalytic activity,molecular_function,nucleotide binding |
| ug2253_2   | 265                  |                                                                              |                                                                                                                                                           |                                |                                                                                       |
| ug2254_1   | 727                  | GO:0016740                                                                   |                                                                                                                                                           |                                | transferase activity                                                                  |

| Unigene ID | sequence length (bp) | GO-ID                                                                        | Biological process                                                                           | Cellular component               | Molecular function                                      |
|------------|----------------------|------------------------------------------------------------------------------|----------------------------------------------------------------------------------------------|----------------------------------|---------------------------------------------------------|
| ug2254_2   | 206                  | GO:0016787,GO:0030234                                                        |                                                                                              |                                  | hydrolase activity,enzyme regulator activity            |
| ug2255_1   | 141                  |                                                                              |                                                                                              |                                  |                                                         |
| ug2255_2   | 297                  | GO:0000003,GO:0009791,GO:0009790                                             | reproduction,post-embryonic development,embryonic                                            |                                  |                                                         |
| ug2256_1   | 240                  |                                                                              |                                                                                              |                                  |                                                         |
| ug2256_2   | 432                  | GO:0009987,GO:000019538,GO:0009056,GO:0005622,GO:0005488,GO:0009987,G        | cellular process<br>protein metabolic process,catabolic process,cellular process             | intracellular                    | nucleotide binding<br>binding,enzyme regulator activity |
| ug2257_2   | 127                  |                                                                              |                                                                                              |                                  |                                                         |
| ug2258_1   | 710                  | GO:0009536                                                                   |                                                                                              | plastid                          |                                                         |
| ug2258_2   | 411                  |                                                                              |                                                                                              |                                  |                                                         |
| ug2259_1   | 377                  | GO:0003676                                                                   |                                                                                              |                                  | nucleic acid binding                                    |
| ug2259_2   | 248                  |                                                                              |                                                                                              |                                  |                                                         |
| ug2260_1   | 655                  | GO:0005515                                                                   |                                                                                              |                                  | protein binding                                         |
| ug2260_2   | 360                  |                                                                              |                                                                                              |                                  |                                                         |
| ug2261_1   | 323                  |                                                                              |                                                                                              |                                  |                                                         |
| ug2261_2   | 674                  |                                                                              |                                                                                              |                                  |                                                         |
| ug2262_1   | 480                  |                                                                              |                                                                                              |                                  |                                                         |
| ug2262_2   | 525                  |                                                                              |                                                                                              |                                  |                                                         |
| ug2263_1   | 744                  | GO:0006412,GO:0005622,GO:0005198,GO:0009987,GO:0005737,GO:0000166,GO:0016020 | translation,cellular process                                                                 | intracellular,cytoplasm,membrane | structural molecule activity,nucleotide binding         |
| ug2263_2   | 351                  | GO:0016301,GO:0000125                                                        |                                                                                              |                                  | kinase activity,nucleotide                              |
| ug2264_1   | 125                  |                                                                              |                                                                                              |                                  |                                                         |
| ug2264_2   | 516                  |                                                                              |                                                                                              |                                  |                                                         |
| ug2265_1   | 250                  | GO:0016020,GO:0019538,GO:0009056,GO:000538                                   | protein metabolic process,catabolic process                                                  | membrane                         | hydrolase activity                                      |
| ug2265_2   | 443                  |                                                                              |                                                                                              |                                  |                                                         |
| ug2266_1   | 778                  |                                                                              |                                                                                              |                                  |                                                         |
| ug2266_2   | 285                  |                                                                              |                                                                                              |                                  |                                                         |
| ug2267_1   | 196                  |                                                                              |                                                                                              |                                  |                                                         |
| ug2267_2   | 144                  |                                                                              |                                                                                              |                                  |                                                         |
| ug2268_1   | 163                  |                                                                              |                                                                                              |                                  |                                                         |
| ug2268_2   | 131                  |                                                                              |                                                                                              |                                  |                                                         |
| ug2269_1   | 184                  |                                                                              |                                                                                              |                                  |                                                         |
| ug2269_2   | 100                  |                                                                              |                                                                                              |                                  |                                                         |
| ug2270_1   | 192                  |                                                                              |                                                                                              |                                  |                                                         |
| ug2270_2   | 187                  | GO:0009719,GO:0005155,GO:0005739,GO:0009628,GO:0005886                       | response to endogenous stimulus,response to abiotic stimulus                                 | mitochondrion,plasma membrane    | protein binding                                         |
| ug2271_1   | 188                  |                                                                              |                                                                                              |                                  |                                                         |
| ug2271_2   | 155                  | GO:0005488,GO:0008152,GO:0003824                                             | metabolic process                                                                            |                                  | binding,catalytic activity                              |
| ug2272_1   | 180                  |                                                                              |                                                                                              |                                  |                                                         |
| ug2272_2   | 151                  |                                                                              |                                                                                              |                                  |                                                         |
| ug2273_1   | 215                  |                                                                              |                                                                                              |                                  |                                                         |
| ug2273_2   | 180                  |                                                                              |                                                                                              |                                  |                                                         |
| ug2274_1   | 191                  |                                                                              |                                                                                              |                                  |                                                         |
| ug2274_2   | 220                  |                                                                              |                                                                                              |                                  |                                                         |
| ug2275_1   | 198                  |                                                                              |                                                                                              |                                  |                                                         |
| ug2275_2   | 133                  |                                                                              |                                                                                              |                                  |                                                         |
| ug2276_1   | 173                  |                                                                              |                                                                                              |                                  |                                                         |
| ug2276_2   | 127                  |                                                                              |                                                                                              |                                  |                                                         |
| ug2277_1   | 143                  |                                                                              |                                                                                              |                                  |                                                         |
| ug2277_2   | 151                  |                                                                              |                                                                                              |                                  |                                                         |
| ug2278_1   | 192                  |                                                                              |                                                                                              |                                  |                                                         |
| ug2278_2   | 331                  |                                                                              |                                                                                              |                                  |                                                         |
| ug2279_1   | 121                  |                                                                              |                                                                                              |                                  |                                                         |
| ug2279_2   | 314                  |                                                                              |                                                                                              |                                  |                                                         |
| ug2280_1   | 682                  |                                                                              |                                                                                              |                                  |                                                         |
| ug2280_2   | 161                  |                                                                              |                                                                                              |                                  |                                                         |
| ug2281_1   | 713                  |                                                                              |                                                                                              |                                  |                                                         |
| ug2281_2   | 714                  | GO:0009058,GO:0005975,GO:0009987,GO:0006629,GO:0016740,GO:0009536,GO:000573  | biosynthetic process,carbohydrate metabolic process,cellular process,lipid metabolic process | plastid,mitochondrion            | transferase activity                                    |
| ug2282_1   | 336                  |                                                                              |                                                                                              |                                  |                                                         |
| ug2282_2   | 694                  | GO:0019538,GO:0009056,GO:0009987,GO:0003824,GO:0006464                       | protein metabolic process,catabolic process,cellular process,protein modification process    |                                  | catalytic activity                                      |
| ug2283_1   | 199                  |                                                                              |                                                                                              |                                  |                                                         |
| ug2283_2   | 749                  | GO:0008152,GO:0016740,GO:0009536                                             | metabolic process                                                                            | plastid                          | transferase activity                                    |
| ug2284_1   | 193                  |                                                                              |                                                                                              |                                  |                                                         |
| ug2284_2   | 377                  |                                                                              |                                                                                              |                                  |                                                         |

| Unigene ID | sequence length (bp) | GO-ID                                                                                             | Biological process                                                                                                 | Cellular component       | Molecular function                                                                                  |
|------------|----------------------|---------------------------------------------------------------------------------------------------|--------------------------------------------------------------------------------------------------------------------|--------------------------|-----------------------------------------------------------------------------------------------------|
| ug2285_1   | 658                  | GO:0016787,GO:0003723,GO:0000166,GO:008135,GO:0006412                                             | translation                                                                                                        |                          | hydrolase activity,RNA binding,nucleotide binding,translation factor activity, nucleic acid binding |
| ug2285_2   | 467                  |                                                                                                   |                                                                                                                    |                          |                                                                                                     |
| ug2286_1   | 393                  |                                                                                                   |                                                                                                                    |                          |                                                                                                     |
| ug2286_2   | 247                  |                                                                                                   |                                                                                                                    |                          |                                                                                                     |
| ug2287_1   | 295                  |                                                                                                   |                                                                                                                    |                          |                                                                                                     |
| ug2287_2   | 177                  |                                                                                                   |                                                                                                                    |                          |                                                                                                     |
| ug2288_1   | 307                  | GO:0005783                                                                                        |                                                                                                                    | endoplasmic reticulum    |                                                                                                     |
| ug2288_2   | 227                  |                                                                                                   |                                                                                                                    |                          |                                                                                                     |
| ug2289_1   | 296                  |                                                                                                   |                                                                                                                    |                          |                                                                                                     |
| ug2289_2   | 188                  | GO:0005488,GO:0016                                                                                |                                                                                                                    | membrane                 | binding                                                                                             |
| ug2290_1   | 159                  |                                                                                                   |                                                                                                                    |                          |                                                                                                     |
| ug2290_2   | 427                  |                                                                                                   |                                                                                                                    |                          |                                                                                                     |
| ug2291_1   | 620                  | GO:0005515,GO:0003                                                                                |                                                                                                                    |                          | protein binding,DNA binding                                                                         |
| ug2291_2   | 793                  | GO:0005737,GO:0005488,GO:0006950,GO:003824,GO:0005975,GO:0006091,GO:000905                        | response to stress,carbohydrate metabolic process,generation of precursor metabolites and energy,catabolic process | cytoplasm                | binding,catalytic activity                                                                          |
| ug2292_1   | 213                  |                                                                                                   |                                                                                                                    |                          |                                                                                                     |
| ug2292_2   | 287                  |                                                                                                   |                                                                                                                    |                          |                                                                                                     |
| ug2293_1   | 300                  |                                                                                                   |                                                                                                                    |                          |                                                                                                     |
| ug2293_2   | 131                  | GO:0005488,GO:0016                                                                                |                                                                                                                    |                          | binding,transferase activity                                                                        |
| ug2294     | 204                  |                                                                                                   |                                                                                                                    |                          |                                                                                                     |
| ug2295     | 230                  | GO:0005488,GO:000515,GO:0003824                                                                   |                                                                                                                    |                          | binding,protein binding,catalytic activity                                                          |
| ug2296     | 142                  |                                                                                                   |                                                                                                                    |                          |                                                                                                     |
| ug2297     | 128                  |                                                                                                   |                                                                                                                    |                          |                                                                                                     |
| ug2298     | 198                  | GO:0006464,GO:0005886,GO:0016301,GO:0                                                             | protein modification process                                                                                       | plasma membrane          | kinase activity,nucleotide binding                                                                  |
| ug2299     | 330                  |                                                                                                   |                                                                                                                    |                          |                                                                                                     |
| ug2300     | 124                  |                                                                                                   |                                                                                                                    |                          |                                                                                                     |
| ug2301     | 305                  | GO:0008152,GO:000987,GO:0003824,GO:00016787,GO:0005975,GO:0009056,GO:008150,GO:0009987,GO:0030246 | metabolic process,cellular process                                                                                 |                          | catalytic activity,binding                                                                          |
| ug2302     | 275                  |                                                                                                   | carbohydrate metabolic process,catabolic process,biological_process,cellular process                               |                          | hydrolase activity,carbohydrate binding                                                             |
| ug2303     | 181                  |                                                                                                   |                                                                                                                    |                          |                                                                                                     |
| ug2304     | 225                  |                                                                                                   |                                                                                                                    |                          |                                                                                                     |
| ug2305     | 194                  |                                                                                                   |                                                                                                                    |                          |                                                                                                     |
| ug2306     | 166                  |                                                                                                   |                                                                                                                    |                          |                                                                                                     |
| ug2307     | 298                  | GO:0006464,GO:0000166,GO:0016301                                                                  | protein modification process                                                                                       |                          | nucleotide binding,kinase activity                                                                  |
| ug2308     | 559                  | GO:0006091,GO:0009056,GO:0003824,GO:0008152,GO:0003                                               | generation of precursor metabolites and energy,catabolic process,metabolic process                                 |                          | catalytic activity                                                                                  |
| ug2309     | 254                  | GO:0008152,GO:0003824,GO:0005488,GO:0030528                                                       | metabolic process                                                                                                  |                          | catalytic activity,binding,transcription regulator activity                                         |
| ug2310     | 201                  |                                                                                                   |                                                                                                                    |                          |                                                                                                     |
| ug2311     | 230                  |                                                                                                   |                                                                                                                    |                          |                                                                                                     |
| ug2312     | 158                  | GO:0004872,GO:0006464,GO:0006950,GO:0005886,GO:0005515,GO:0000166,GO:0016020,GO:0008289,GO:001    | protein modification process,response to stress                                                                    | plasma membrane,membrane | receptor activity,protein binding,nucleotide binding,lipid binding,kinase activity                  |
| ug2313     | 202                  |                                                                                                   |                                                                                                                    |                          |                                                                                                     |
| ug2314     | 157                  |                                                                                                   |                                                                                                                    |                          |                                                                                                     |
| ug2315     | 400                  |                                                                                                   |                                                                                                                    |                          |                                                                                                     |
| ug2316     | 245                  |                                                                                                   |                                                                                                                    |                          |                                                                                                     |
| ug2317     | 300                  |                                                                                                   |                                                                                                                    |                          |                                                                                                     |
| ug2318     | 240                  |                                                                                                   |                                                                                                                    |                          |                                                                                                     |
| ug2319     | 313                  |                                                                                                   |                                                                                                                    |                          |                                                                                                     |
| ug2320     | 645                  |                                                                                                   |                                                                                                                    |                          |                                                                                                     |
| ug2321     | 274                  |                                                                                                   |                                                                                                                    |                          |                                                                                                     |
| ug2322     | 597                  |                                                                                                   |                                                                                                                    |                          |                                                                                                     |
| ug2323     | 302                  | GO:0003676                                                                                        |                                                                                                                    |                          | nucleic acid binding                                                                                |
| ug2324     | 413                  |                                                                                                   |                                                                                                                    |                          |                                                                                                     |
| ug2325     | 516                  |                                                                                                   |                                                                                                                    |                          |                                                                                                     |
| ug2326     | 524                  | GO:0006810,GO:0005829,GO:0008289                                                                  | transport                                                                                                          | cytosol                  | lipid binding                                                                                       |
| ug2327     | 336                  |                                                                                                   |                                                                                                                    |                          |                                                                                                     |
| ug2328     | 632                  | GO:0005488                                                                                        |                                                                                                                    |                          | binding                                                                                             |
| ug2329     | 825                  |                                                                                                   |                                                                                                                    |                          |                                                                                                     |
| ug2330     | 769                  | GO:0005623,GO:0004518,GO:0003723                                                                  |                                                                                                                    | cell                     | nuclease activity,RNA binding                                                                       |

| Unigene ID | sequence length (bp) | GO-ID                                                                                          | Biological process                                                                                                      | Cellular component                                             | Molecular function                                             |
|------------|----------------------|------------------------------------------------------------------------------------------------|-------------------------------------------------------------------------------------------------------------------------|----------------------------------------------------------------|----------------------------------------------------------------|
| ug2331     | 428                  | GO:0005737,GO:0003824,GO:0006519,GO:019748,GO:0009058,GO:0009056                               | cellular amino acid and derivative metabolic process,secondary metabolic process,biosynthetic process,catabolic process | cytoplasm                                                      | catalytic activity                                             |
| ug2332     | 554                  | GO:0005488,GO:0019538,GO:0009056,GO:009987,GO:0005886,GO:0006464,GO:000382                     | protein metabolic process,catabolic process,cellular process,protein modification process                               | plasma membrane,intracellular                                  | binding,catalytic activity                                     |
| ug2333     | 326                  | GO:0003677,GO:0005488,GO:0006259                                                               | DNA metabolic process                                                                                                   |                                                                | DNA binding,binding                                            |
| ug2334     | 111                  |                                                                                                |                                                                                                                         |                                                                |                                                                |
| ug2335     | 159                  |                                                                                                |                                                                                                                         |                                                                |                                                                |
| ug2336     | 662                  |                                                                                                |                                                                                                                         |                                                                |                                                                |
| ug2337     | 105                  |                                                                                                |                                                                                                                         |                                                                |                                                                |
| ug2338     | 270                  |                                                                                                |                                                                                                                         |                                                                |                                                                |
| ug2339     | 615                  |                                                                                                |                                                                                                                         |                                                                |                                                                |
| ug2340     | 442                  | GO:0016740                                                                                     |                                                                                                                         |                                                                | transferase activity                                           |
| ug2341     | 619                  | GO:0016020,GO:0005215,GO:0006810,GO:009607,GO:0005886                                          | transport,response to biotic stimulus                                                                                   | membrane,plasma membrane                                       | transporter activity                                           |
| ug2342     | 380                  | GO:0005488                                                                                     |                                                                                                                         |                                                                | binding                                                        |
| ug2343     | 490                  |                                                                                                |                                                                                                                         |                                                                |                                                                |
| ug2344     | 102                  |                                                                                                |                                                                                                                         |                                                                |                                                                |
| ug2345     | 638                  |                                                                                                |                                                                                                                         |                                                                |                                                                |
| ug2346     | 412                  | GO:0009987,GO:0009425                                                                          | cellular process,catabolic process                                                                                      |                                                                |                                                                |
| ug2347     | 425                  |                                                                                                |                                                                                                                         |                                                                |                                                                |
| ug2348     | 760                  |                                                                                                |                                                                                                                         |                                                                |                                                                |
| ug2349     | 816                  | GO:0005618,GO:0016043,GO:0009987,GO:0005794,GO:0005886,GO:0009058,GO:0005975,GO:0005576,GO:001 | cellular component organization,cellular process,biosynthetic process,carbohydrate metabolic process                    | cell wall,Golgi apparatus,plasma membrane,extracellular region | transferase activity                                           |
| ug2350     | 243                  |                                                                                                |                                                                                                                         |                                                                |                                                                |
| ug2351     | 564                  | GO:0005515,GO:0000003,GO:0009791,GO:0                                                          | reproduction,post-embryonic development,embryonic                                                                       |                                                                | protein binding                                                |
| ug2352     | 671                  |                                                                                                |                                                                                                                         |                                                                |                                                                |
| ug2353     | 418                  |                                                                                                |                                                                                                                         |                                                                |                                                                |
| ug2354     | 726                  | GO:0005840,GO:0005198,GO:0006412                                                               | translation                                                                                                             | ribosome                                                       | structural molecule activity                                   |
| ug2355     | 342                  |                                                                                                |                                                                                                                         |                                                                |                                                                |
| ug2356     | 302                  |                                                                                                |                                                                                                                         |                                                                |                                                                |
| ug2357     | 341                  |                                                                                                |                                                                                                                         |                                                                |                                                                |
| ug2358     | 321                  | GO:0005622,GO:0016787,GO:0019538,GO:009056,GO:0009987,GO:0000166,GO:000563                     | protein metabolic process,catabolic process,cellular process                                                            | intracellular,nucleus,cytosol                                  | hydrolase activity,nucleotide binding                          |
| ug2359     | 211                  |                                                                                                |                                                                                                                         |                                                                |                                                                |
| ug2360     | 851                  |                                                                                                |                                                                                                                         |                                                                |                                                                |
| ug2361     | 482                  | GO:0006950,GO:0006259,GO:0003824,GO:0                                                          | response to stress,DNA metabolic process                                                                                | plastid                                                        | catalytic activity                                             |
| ug2362     | 327                  |                                                                                                |                                                                                                                         |                                                                |                                                                |
| ug2363     | 104                  |                                                                                                |                                                                                                                         |                                                                |                                                                |
| ug2364     | 705                  | GO:0005622,GO:0000916                                                                          |                                                                                                                         | intracellular                                                  | nucleotide binding                                             |
| ug2365     | 916                  |                                                                                                |                                                                                                                         |                                                                |                                                                |
| ug2366     | 485                  | GO:0030246,GO:0006464,GO:0000166,GO:0                                                          | protein modification process                                                                                            |                                                                | carbohydrate binding,nucleotide                                |
| ug2367     | 440                  |                                                                                                |                                                                                                                         |                                                                |                                                                |
| ug2368     | 427                  | GO:0005737                                                                                     |                                                                                                                         | cytoplasm                                                      |                                                                |
| ug2369     | 822                  |                                                                                                |                                                                                                                         |                                                                |                                                                |
| ug2370     | 428                  | GO:0003824,GO:0016740,GO:000515                                                                |                                                                                                                         | membrane                                                       | catalytic activity transferase activity,protein binding        |
| ug2371     | 216                  |                                                                                                |                                                                                                                         |                                                                |                                                                |
| ug2372     | 418                  | GO:0008152,GO:0009987,GO:0003824,GO:0003824,GO:0008                                            | metabolic process,cellular process                                                                                      |                                                                | catalytic activity,binding                                     |
| ug2373     | 810                  | GO:0005739,GO:0005488,GO:0016020,GO                                                            | biological_process,generation of precursor metabolites and energy                                                       | mitochondrion,membrane                                         | catalytic activity,binding                                     |
| ug2374     | 114                  |                                                                                                |                                                                                                                         |                                                                |                                                                |
| ug2375     | 188                  |                                                                                                |                                                                                                                         |                                                                |                                                                |
| ug2376     | 151                  |                                                                                                |                                                                                                                         |                                                                |                                                                |
| ug2377     | 395                  |                                                                                                |                                                                                                                         |                                                                |                                                                |
| ug2378     | 343                  | GO:0016787,GO:0005975,GO:0005618,GO:0005840,GO:0005488                                         | carbohydrate metabolic process                                                                                          | cell wall,ribosome                                             | hydrolase activity,binding                                     |
| ug2379     | 243                  |                                                                                                |                                                                                                                         |                                                                |                                                                |
| ug2380     | 264                  | GO:0005488                                                                                     |                                                                                                                         |                                                                | binding                                                        |
| ug2381     | 475                  | GO:0005623                                                                                     |                                                                                                                         | cell                                                           |                                                                |
| ug2382     | 715                  | GO:0030528,GO:0003700,GO:0016043,GO:0006350,GO:0005634                                         | cellular component organization,transcription                                                                           | nucleus                                                        | transcription regulator activity,transcription factor activity |



| Unigene ID | sequence length (bp) | GO-ID                                                                                                                                                                     | Biological process                                                                                                        | Cellular component                   | Molecular function                            |
|------------|----------------------|---------------------------------------------------------------------------------------------------------------------------------------------------------------------------|---------------------------------------------------------------------------------------------------------------------------|--------------------------------------|-----------------------------------------------|
| ug2383     | 554                  | GO:0005488,GO:0008152,GO:0003824,GO:0003674,GO:0006950                                                                                                                    | metabolic process,response to stress                                                                                      |                                      | binding,catalytic activity,molecular_function |
| ug2384     | 468                  |                                                                                                                                                                           |                                                                                                                           |                                      |                                               |
| ug2385     | 876                  |                                                                                                                                                                           |                                                                                                                           |                                      |                                               |
| ug2386     | 252                  |                                                                                                                                                                           |                                                                                                                           |                                      |                                               |
| ug2387     | 192                  |                                                                                                                                                                           |                                                                                                                           |                                      |                                               |
| ug2388     | 405                  | GO:0009058,GO:0006519,GO:0016301,GO:0                                                                                                                                     | biosynthetic process,cellular amino acid and derivative metabolic                                                         | plastid                              | kinase activity                               |
| ug2389     | 255                  |                                                                                                                                                                           |                                                                                                                           |                                      |                                               |
| ug2390     | 101                  |                                                                                                                                                                           |                                                                                                                           |                                      |                                               |
| ug2391     | 469                  |                                                                                                                                                                           |                                                                                                                           |                                      |                                               |
| ug2392     | 772                  | GO:0009719,GO:0006350,GO:0003700,GO:0                                                                                                                                     | response to endogenous stimulus,transcription                                                                             | nucleus                              | transcription factor activity                 |
| ug2393     | 945                  |                                                                                                                                                                           |                                                                                                                           |                                      |                                               |
| ug2394     | 261                  |                                                                                                                                                                           |                                                                                                                           |                                      |                                               |
| ug2395     | 214                  |                                                                                                                                                                           |                                                                                                                           |                                      |                                               |
| ug2396     | 773                  | GO:0019538,GO:0009987,GO:0005515                                                                                                                                          | protein metabolic process,cellular process                                                                                |                                      | protein binding                               |
| ug2397     | 562                  |                                                                                                                                                                           |                                                                                                                           |                                      |                                               |
| ug2398     | 185                  |                                                                                                                                                                           |                                                                                                                           |                                      |                                               |
| ug2399     | 716                  |                                                                                                                                                                           |                                                                                                                           |                                      |                                               |
| ug2400     | 637                  | GO:0006091,GO:0000166,GO:0016020,GO:0005622,GO:0003824,GO:0005488,GO:0005730,GO:0005488,GO:0016787,GO:0019538,GO:0009056,GO:0009536                                       | generation of precursor metabolites and energy                                                                            | membrane,intracellular,mitochondrion | nucleotide binding,catalytic activity,binding |
| ug2401     | 567                  | GO:0019538,GO:0009056,GO:0009536                                                                                                                                          | protein metabolic process,catabolic process                                                                               | plastid                              | binding,hydrolase activity                    |
| ug2402     | 226                  |                                                                                                                                                                           |                                                                                                                           |                                      |                                               |
| ug2403     | 752                  |                                                                                                                                                                           |                                                                                                                           |                                      |                                               |
| ug2404     | 833                  | GO:0030246,GO:0005757                                                                                                                                                     |                                                                                                                           | cell                                 | carbohydrate binding                          |
| ug2405     | 757                  |                                                                                                                                                                           |                                                                                                                           |                                      |                                               |
| ug2406     | 615                  | GO:0008152,GO:0003401,GO:0005634                                                                                                                                          | metabolic process                                                                                                         | nucleus                              | catalytic activity                            |
| ug2407     | 401                  |                                                                                                                                                                           |                                                                                                                           |                                      |                                               |
| ug2408     | 265                  |                                                                                                                                                                           |                                                                                                                           |                                      |                                               |
| ug2409     | 266                  |                                                                                                                                                                           |                                                                                                                           |                                      |                                               |
| ug2410     | 105                  |                                                                                                                                                                           |                                                                                                                           |                                      |                                               |
| ug2411     | 555                  |                                                                                                                                                                           |                                                                                                                           |                                      |                                               |
| ug2412     | 727                  | GO:0016740,GO:0009058,GO:0006519,GO:0                                                                                                                                     | biosynthetic process,cellular amino acid and derivative metabolic                                                         |                                      | transferase activity,binding                  |
| ug2413     | 131                  |                                                                                                                                                                           |                                                                                                                           |                                      |                                               |
| ug2414     | 612                  |                                                                                                                                                                           |                                                                                                                           |                                      |                                               |
| ug2415     | 929                  |                                                                                                                                                                           |                                                                                                                           |                                      |                                               |
| ug2416     | 665                  | GO:0009536,GO:0016740,GO:0009058,GO:0005975,GO:0009987                                                                                                                    | biosynthetic process,carbohydrate metabolic process,cellular process                                                      | plastid                              | transferase activity                          |
| ug2417     | 185                  |                                                                                                                                                                           |                                                                                                                           |                                      |                                               |
| ug2418     | 409                  |                                                                                                                                                                           |                                                                                                                           |                                      |                                               |
| ug2419     | 575                  |                                                                                                                                                                           |                                                                                                                           |                                      |                                               |
| ug2420     | 150                  |                                                                                                                                                                           |                                                                                                                           |                                      |                                               |
| ug2421     | 679                  |                                                                                                                                                                           |                                                                                                                           |                                      |                                               |
| ug2422     | 321                  |                                                                                                                                                                           |                                                                                                                           |                                      |                                               |
| ug2423     | 609                  | GO:0005975,GO:0016787,GO:0005488                                                                                                                                          | carbohydrate metabolic process                                                                                            |                                      | hydrolase activity,binding                    |
| ug2424     | 540                  |                                                                                                                                                                           |                                                                                                                           |                                      |                                               |
| ug2425     | 708                  | GO:0006464,GO:0016020,GO:0016787                                                                                                                                          | protein modification process                                                                                              | membrane                             | hydrolase activity                            |
| ug2426     | 468                  |                                                                                                                                                                           |                                                                                                                           |                                      |                                               |
| ug2427     | 708                  | GO:0016740,GO:0009058,GO:0009987,GO:0005488,GO:0009058,GO:0009987,GO:0                                                                                                    | biosynthetic process,cellular process,lipid metabolic process                                                             |                                      | transferase activity                          |
| ug2428     | 608                  | GO:0006629,GO:0005886,GO:0003824,GO:0000003,GO:0030154,GO:000                                                                                                             | process,reproduction,cell differentiation,multicellular organismal development                                            | plasma membrane                      | binding,catalytic activity                    |
| ug2429     | 852                  |                                                                                                                                                                           |                                                                                                                           |                                      |                                               |
| ug2430     | 342                  |                                                                                                                                                                           |                                                                                                                           |                                      |                                               |
| ug2431     | 205                  |                                                                                                                                                                           |                                                                                                                           |                                      |                                               |
| ug2432     | 250                  |                                                                                                                                                                           |                                                                                                                           |                                      |                                               |
| ug2433     | 671                  |                                                                                                                                                                           |                                                                                                                           |                                      |                                               |
| ug2434     | 831                  | GO:0009791,GO:0003723,GO:0003677,GO:0006950,GO:0009628,GO:0005739,GO:0000160,GO:0009605,GO:0006950,GO:0008150,GO:0005215,GO:0006810,GO:0019538,GO:0009056,GO:0016787,GO:0 | post-embryonic development,response to stress,response to abiotic stimulus                                                | mitochondrion                        | RNA binding,DNA binding,nucleotide binding    |
| ug2435     | 909                  | GO:0009605,GO:0006950,GO:0008150,GO:0005215,GO:0006810,GO:0019538,GO:0009056,GO:0016787,GO:0                                                                              | response to external stimulus,response to stress,biological_process,transport protein metabolic process,catabolic process |                                      | transporter activity                          |
| ug2436     | 754                  | GO:0019538,GO:0009056,GO:0016787,GO:0                                                                                                                                     | protein metabolic process,catabolic process                                                                               |                                      | hydrolase activity,protein binding            |











| Unigene ID | sequence length (bp) | GO-ID                                                                                                                    | Biological process                                                                                                                                  | Cellular component                   | Molecular function                                                 |
|------------|----------------------|--------------------------------------------------------------------------------------------------------------------------|-----------------------------------------------------------------------------------------------------------------------------------------------------|--------------------------------------|--------------------------------------------------------------------|
| ug2714     | 628                  | GO:0006464,GO:0000166,GO:0003824,GO:0016301,GO:0005622                                                                   | protein modification process                                                                                                                        | intracellular                        | nucleotide binding,catalytic activity,kinase activity              |
| ug2715     | 796                  |                                                                                                                          |                                                                                                                                                     |                                      |                                                                    |
| ug2716     | 532                  |                                                                                                                          |                                                                                                                                                     |                                      |                                                                    |
| ug2717     | 293                  |                                                                                                                          |                                                                                                                                                     |                                      |                                                                    |
| ug2718     | 748                  | GO:0005737,GO:0006810,GO:0005215,GO:0008289,GO:0008150,GO:0008219,GO:0006950                                             | transport,biological_process,cell death,response to stress,response to biotic stimulus                                                              | cytoplasm                            | transporter activity,lipid binding                                 |
| ug2719     | 312                  | GO:0016740                                                                                                               |                                                                                                                                                     |                                      | transferase activity                                               |
| ug2720     | 111                  |                                                                                                                          |                                                                                                                                                     |                                      |                                                                    |
| ug2721     | 864                  | GO:0016020,GO:0005622,GO:0016787,GO:0005215,GO:0006810,GO:0006091,GO:0006139,GO:0009058,GO:0005305,GO:0005634,GO:0000000 | transport,generation of precursor metabolites and energy,nucleobase, nucleoside, nucleotide and nucleic acid metabolic process,biosynthetic process | membrane,intracellular               | hydrolase activity,transporter activity,nucleotide binding         |
| ug2722     | 332                  | GO:0030528,GO:0006350,GO:0005634,GO:0000000                                                                              | transcription                                                                                                                                       | nucleus,mitochondrion                | transcription regulator activity                                   |
| ug2723     | 302                  |                                                                                                                          |                                                                                                                                                     |                                      |                                                                    |
| ug2724     | 863                  | GO:0016740                                                                                                               |                                                                                                                                                     |                                      | transferase activity                                               |
| ug2725     | 772                  | GO:0006412,GO:0008135                                                                                                    | translation                                                                                                                                         |                                      | translation factor activity, nucleic acid binding                  |
| ug2726     | 442                  |                                                                                                                          |                                                                                                                                                     |                                      |                                                                    |
| ug2727     | 221                  |                                                                                                                          |                                                                                                                                                     |                                      |                                                                    |
| ug2728     | 281                  |                                                                                                                          |                                                                                                                                                     |                                      |                                                                    |
| ug2729     | 846                  | GO:0016787,GO:0019538,GO:0009056,GO:0001166,GO:0016020,GO:0005488,GO:0009539                                             | protein metabolic process,catabolic process                                                                                                         | membrane,plastid,mitochondrion       | hydrolase activity,nucleotide binding,binding                      |
| ug2730     | 212                  |                                                                                                                          |                                                                                                                                                     |                                      |                                                                    |
| ug2731     | 862                  | GO:0009058,GO:0005975,GO:0005737,GO:0003666                                                                              | biosynthetic process,carbohydrate metabolic process                                                                                                 | cytoplasm                            | transferase activity                                               |
| ug2732     | 366                  |                                                                                                                          |                                                                                                                                                     |                                      |                                                                    |
| ug2733     | 793                  | GO:0016787,GO:0000003,GO:0009791,GO:0009790,GO:0009058,GO:0006519                                                        | reproduction,post-embryonic development,embryonic development,biosynthetic process,cellular amino acid and derivative metabolic process             |                                      | hydrolase activity                                                 |
| ug2734     | 680                  | GO:0006139                                                                                                               | nucleobase, nucleoside, nucleotide and nucleic acid metabolic process                                                                               |                                      |                                                                    |
| ug2735     | 730                  | GO:0005840,GO:0009536,GO:0005198,GO:0003723,GO:0006412                                                                   | translation                                                                                                                                         | ribosome,plastid                     | structural molecule activity,RNA binding                           |
| ug2736     | 820                  | GO:0003676,GO:0004518                                                                                                    |                                                                                                                                                     |                                      | nucleic acid binding,nuclease activity                             |
| ug2737     | 891                  | GO:0016740                                                                                                               |                                                                                                                                                     |                                      | transferase activity                                               |
| ug2738     | 874                  |                                                                                                                          |                                                                                                                                                     |                                      |                                                                    |
| ug2739     | 519                  |                                                                                                                          |                                                                                                                                                     |                                      |                                                                    |
| ug2740     | 933                  |                                                                                                                          |                                                                                                                                                     |                                      |                                                                    |
| ug2741     | 907                  | GO:0005576,GO:0009812                                                                                                    |                                                                                                                                                     | extracellular region,plastid         |                                                                    |
| ug2742     | 812                  |                                                                                                                          |                                                                                                                                                     |                                      |                                                                    |
| ug2743     | 105                  |                                                                                                                          |                                                                                                                                                     |                                      |                                                                    |
| ug2744     | 126                  |                                                                                                                          |                                                                                                                                                     |                                      |                                                                    |
| ug2745     | 109                  |                                                                                                                          |                                                                                                                                                     |                                      |                                                                    |
| ug2746     | 461                  | GO:0005515,GO:0009719,GO:0007165,GO:0005634,GO:0006350                                                                   | response to endogenous stimulus,signal transduction,transcription                                                                                   | nucleus                              | protein binding                                                    |
| ug2747     | 748                  |                                                                                                                          |                                                                                                                                                     |                                      |                                                                    |
| ug2748     | 822                  | GO:0003676                                                                                                               |                                                                                                                                                     |                                      | nucleic acid binding                                               |
| ug2749     | 897                  | GO:0016020,GO:0005739,GO:0005622,GO:0003674,GO:0003824,GO:0005488,GO:0006810                                             | transport,generation of precursor metabolites and energy                                                                                            | membrane,mitochondrion,intracellular | molecular_function,catalytic activity,binding                      |
| ug2750     | 784                  |                                                                                                                          |                                                                                                                                                     |                                      |                                                                    |
| ug2751     | 229                  |                                                                                                                          |                                                                                                                                                     |                                      |                                                                    |
| ug2752     | 450                  |                                                                                                                          |                                                                                                                                                     |                                      |                                                                    |
| ug2753     | 629                  | GO:0016020                                                                                                               |                                                                                                                                                     | membrane                             |                                                                    |
| ug2754     | 727                  |                                                                                                                          |                                                                                                                                                     |                                      |                                                                    |
| ug2755     | 621                  |                                                                                                                          |                                                                                                                                                     |                                      |                                                                    |
| ug2756     | 565                  | GO:0016020,GO:0005739,GO:0005488,GO:0003674,GO:0006810,GO:0006091,GO:0003824                                             | transport,generation of precursor metabolites and energy                                                                                            | membrane,mitochondrion               | binding,molecular_function,catalytic activity,transporter activity |
| ug2757     | 853                  | GO:0009536                                                                                                               |                                                                                                                                                     | plastid                              |                                                                    |
| ug2758     | 701                  | GO:0005488,GO:0008152,GO:0003824                                                                                         | metabolic process                                                                                                                                   |                                      | binding,catalytic activity                                         |
| ug2759     | 590                  | GO:0005488,GO:0003676,GO:0005622                                                                                         |                                                                                                                                                     | intracellular                        | binding,nucleic acid binding                                       |





| Unigene ID | sequence length (bp) | GO-ID                                                                                              | Biological process                                                                               | Cellular component    | Molecular function                                          |
|------------|----------------------|----------------------------------------------------------------------------------------------------|--------------------------------------------------------------------------------------------------|-----------------------|-------------------------------------------------------------|
| ug2810     | 369                  | GO:0019538,GO:0009                                                                                 | protein metabolic process,catabolic                                                              |                       |                                                             |
| ug2811     | 454                  | 056,GO:0009987,GO:0003824,GO:0006464                                                               | process,cellular process,protein modification process                                            |                       | catalytic activity                                          |
| ug2812     | 867                  | GO:0005975,GO:0016787,GO:0009536                                                                   | carbohydrate metabolic process                                                                   | plastid               | hydrolase activity                                          |
| ug2813     | 282                  |                                                                                                    |                                                                                                  |                       |                                                             |
| ug2814     | 916                  | GO:0003824,GO:0009536,GO:0006950                                                                   | response to stress                                                                               | plastid               | catalytic activity                                          |
| ug2815     | 873                  | GO:0009536,GO:0003824,GO:0005515                                                                   |                                                                                                  | plastid               | catalytic activity,protein binding                          |
| ug2816     | 157                  |                                                                                                    |                                                                                                  |                       |                                                             |
| ug2817     | 709                  | GO:0005886                                                                                         |                                                                                                  | plasma membrane       |                                                             |
| ug2818     | 596                  |                                                                                                    |                                                                                                  |                       |                                                             |
| ug2819     | 459                  | GO:0005488                                                                                         |                                                                                                  |                       | binding                                                     |
| ug2820     | 839                  | GO:0005488,GO:0005                                                                                 |                                                                                                  |                       | binding,protein binding                                     |
| ug2821     | 114                  |                                                                                                    |                                                                                                  |                       |                                                             |
| ug2822     | 335                  |                                                                                                    |                                                                                                  |                       |                                                             |
| ug2823     | 771                  | GO:0005739                                                                                         |                                                                                                  | mitochondrion         |                                                             |
| ug2824     | 757                  | GO:0008152,GO:0003824,GO:0009536                                                                   | metabolic process                                                                                | plastid               | catalytic activity                                          |
| ug2825     | 716                  | GO:0016787,GO:0008152,GO:0016020,GO:000166,GO:0005215                                              | metabolic process                                                                                | membrane              | hydrolase activity,nucleotide binding,transporter activity  |
| ug2826     | 792                  | GO:0005488                                                                                         |                                                                                                  |                       | binding                                                     |
| ug2827     | 754                  | GO:0006139,GO:0030234                                                                              | nucleobase, nucleoside, nucleotide and nucleic acid metabolic process                            |                       | enzyme regulator activity                                   |
| ug2828     | 719                  |                                                                                                    |                                                                                                  |                       |                                                             |
| ug2829     | 196                  |                                                                                                    |                                                                                                  |                       |                                                             |
| ug2830     | 646                  | GO:0016020,GO:0016043,GO:0009987,GO:0009056,GO:0009                                                | cellular component organization,cellular process                                                 | membrane,plastid      |                                                             |
| ug2831     | 810                  | 987,GO:0005488,GO:0016787,GO:0005739                                                               | catabolic process,cellular process                                                               | mitochondrion         | binding,hydrolase activity                                  |
| ug2832     | 606                  |                                                                                                    |                                                                                                  |                       |                                                             |
| ug2833     | 513                  |                                                                                                    |                                                                                                  |                       |                                                             |
| ug2834     | 119                  |                                                                                                    |                                                                                                  |                       |                                                             |
| ug2835     | 577                  | GO:0005623                                                                                         |                                                                                                  | cell                  |                                                             |
| ug2836     | 803                  | GO:0005488                                                                                         |                                                                                                  |                       | binding                                                     |
| ug2837     | 243                  | GO:0005886,GO:0016740,GO:0009058,GO:0005975,GO:0009987                                             | biosynthetic process,carbohydrate metabolic process,cellular process                             | plasma membrane       | transferase activity                                        |
| ug2838     | 457                  | GO:0004872,GO:0016020,GO:0003824                                                                   |                                                                                                  | membrane              | receptor activity,catalytic activity                        |
| ug2839     | 776                  |                                                                                                    |                                                                                                  |                       |                                                             |
| ug2840     | 764                  | GO:0009536                                                                                         |                                                                                                  | plastid               |                                                             |
| ug2841     | 566                  |                                                                                                    |                                                                                                  |                       |                                                             |
| ug2842     | 578                  |                                                                                                    |                                                                                                  |                       |                                                             |
| ug2843     | 166                  |                                                                                                    |                                                                                                  |                       |                                                             |
| ug2844     | 642                  |                                                                                                    |                                                                                                  |                       |                                                             |
| ug2845     | 713                  | GO:0008152,GO:0005488,GO:0030528,GO:0005623                                                        | metabolic process                                                                                | cell                  | binding,transcription regulator activity,catalytic activity |
| ug2846     | 385                  | GO:0005623                                                                                         |                                                                                                  |                       |                                                             |
| ug2847     | 153                  |                                                                                                    |                                                                                                  |                       |                                                             |
| ug2848     | 467                  |                                                                                                    |                                                                                                  |                       |                                                             |
| ug2849     | 460                  | GO:0003677,GO:0006                                                                                 | transcription                                                                                    |                       | DNA binding                                                 |
| ug2850     | 718                  | GO:0005840,GO:0005198,GO:0006412                                                                   | translation                                                                                      | ribosome              | structural molecule activity                                |
| ug2851     | 346                  | GO:0003676,GO:0005622,GO:0009536                                                                   |                                                                                                  | intracellular,plastid | nucleic acid binding                                        |
| ug2852     | 931                  | GO:0016787                                                                                         |                                                                                                  |                       | hydrolase activity                                          |
| ug2853     | 101                  |                                                                                                    |                                                                                                  |                       |                                                             |
| ug2854     | 841                  |                                                                                                    |                                                                                                  |                       |                                                             |
| ug2855     | 699                  | GO:0005737,GO:0016740,GO:0006464,GO:0016787,GO:0005623                                             | protein modification process                                                                     | cytoplasm,membrane    | hydrolase activity                                          |
| ug2856     | 281                  | GO:0016740,GO:0016787,GO:0005623                                                                   |                                                                                                  | cell                  |                                                             |
| ug2857     | 718                  | GO:0009058,GO:000166,GO:0009536                                                                    | biosynthetic process                                                                             | plastid               | transferase activity,kinase activity,nucleotide binding     |
| ug2858     | 816                  | GO:0005773,GO:0005515,GO:0016787,GO:0006519,GO:0019538,GO:0005737,GO:0005515,GO:0006810,GO:0008135 | cellular amino acid and derivative metabolic process,protein metabolic process,catabolic process | vacuole               | protein binding,hydrolase activity                          |
| ug2859     | 596                  | GO:0005737,GO:0005515,GO:0006810,GO:0008135                                                        | transport,cellular process                                                                       | cytoplasm             | protein binding                                             |
| ug2860     | 636                  | GO:0008135                                                                                         |                                                                                                  |                       | translation factor activity, nucleic acid binding           |
| ug2861     | 687                  | GO:0003723,GO:0004518,GO:0008150,GO:0005623                                                        | biological_process                                                                               | intracellular         | RNA binding,nuclease activity                               |
| ug2862     | 701                  |                                                                                                    |                                                                                                  |                       |                                                             |
| ug2863     | 682                  |                                                                                                    |                                                                                                  |                       |                                                             |

| Unigene ID | sequence length (bp) | GO-ID                                                                                                                                                                     | Biological process                                                                                                                                                                               | Cellular component                                 | Molecular function                                                                      |
|------------|----------------------|---------------------------------------------------------------------------------------------------------------------------------------------------------------------------|--------------------------------------------------------------------------------------------------------------------------------------------------------------------------------------------------|----------------------------------------------------|-----------------------------------------------------------------------------------------|
| ug2864     | 280                  | GO:0000166,GO:0008141                                                                                                                                                     | cell death                                                                                                                                                                                       |                                                    | nucleotide binding                                                                      |
| ug2865     | 141                  |                                                                                                                                                                           |                                                                                                                                                                                                  |                                                    |                                                                                         |
| ug2866     | 865                  | GO:0005623                                                                                                                                                                |                                                                                                                                                                                                  | cell                                               |                                                                                         |
| ug2867     | 500                  |                                                                                                                                                                           |                                                                                                                                                                                                  |                                                    |                                                                                         |
| ug2868     | 771                  | GO:0005488,GO:0005737,GO:0008152,GO:0009987,GO:0000166,GO:0006810,GO:0009                                                                                                 | metabolic process,cellular process                                                                                                                                                               | cytoplasm                                          | binding,nucleotide binding,catalytic activity                                           |
| ug2869     | 884                  |                                                                                                                                                                           |                                                                                                                                                                                                  |                                                    |                                                                                         |
| ug2870     | 618                  | GO:0006810,GO:000987,GO:0016020,GO:0005739,GO:0005488                                                                                                                     | transport,cellular process                                                                                                                                                                       | membrane,mitochondrion                             | binding                                                                                 |
| ug2871     | 804                  |                                                                                                                                                                           |                                                                                                                                                                                                  |                                                    |                                                                                         |
| ug2872     | 881                  |                                                                                                                                                                           |                                                                                                                                                                                                  |                                                    |                                                                                         |
| ug2873     | 571                  | GO:0005488,GO:001020,GO:0005739,GO:0006810,GO:0009987,GO:0009536,GO:000521                                                                                                | transport,cellular process                                                                                                                                                                       | membrane,mitochondrion,plastid                     | binding,transporter activity                                                            |
| ug2874     | 863                  | GO:0005737                                                                                                                                                                |                                                                                                                                                                                                  | cytoplasm                                          |                                                                                         |
| ug2875     | 479                  | GO:0019538,GO:000987,GO:0005488,GO:0003674,GO:0005515,GO:0005737,GO:0003                                                                                                  | protein metabolic process,cellular process                                                                                                                                                       | plastid                                            | binding,molecular_function,protein binding                                              |
| ug2876     | 474                  |                                                                                                                                                                           |                                                                                                                                                                                                  |                                                    |                                                                                         |
| ug2877     | 725                  |                                                                                                                                                                           |                                                                                                                                                                                                  |                                                    |                                                                                         |
| ug2878     | 732                  | GO:0005623,GO:0005                                                                                                                                                        |                                                                                                                                                                                                  | cell,cytoplasm                                     |                                                                                         |
| ug2879     | 497                  | GO:0003676,GO:0000166                                                                                                                                                     |                                                                                                                                                                                                  |                                                    | nucleic acid binding,nucleotide binding                                                 |
| ug2880     | 343                  | GO:0005488,GO:001740,GO:0009058,GO:0006519,GO:0003824,GO:0016020,GO:0009                                                                                                  | biosynthetic process,cellular amino acid and derivative metabolic process                                                                                                                        | plastid                                            | binding,transferase activity,catalytic activity                                         |
| ug2881     | 880                  | GO:0006091,GO:0015979,GO:0005488,GO:0005622,GO:000953                                                                                                                     | generation of precursor metabolites and energy,photosynthesis                                                                                                                                    | membrane,thylakoid,intracellular,plastid           | binding                                                                                 |
| ug2882     | 905                  | GO:0005515,GO:0009                                                                                                                                                        |                                                                                                                                                                                                  | plastid                                            | protein binding                                                                         |
| ug2883     | 425                  |                                                                                                                                                                           |                                                                                                                                                                                                  |                                                    |                                                                                         |
| ug2884     | 463                  | GO:0005737,GO:0003824,GO:0006139,GO:006412,GO:0006519,GO:0000166                                                                                                          | nucleobase, nucleoside, nucleotide and nucleic acid metabolic process,translation,cellular amino acid and derivative metabolic                                                                   | cytoplasm                                          | catalytic activity,nucleotide binding                                                   |
| ug2885     | 728                  |                                                                                                                                                                           |                                                                                                                                                                                                  |                                                    |                                                                                         |
| ug2886     | 488                  | GO:0016020,GO:0005215,GO:0009607,GO:0006810,GO:0005886                                                                                                                    | response to biotic stimulus,transport                                                                                                                                                            | membrane,plasma membrane                           | transporter activity                                                                    |
| ug2887     | 644                  |                                                                                                                                                                           |                                                                                                                                                                                                  |                                                    |                                                                                         |
| ug2888     | 818                  | GO:0005623                                                                                                                                                                |                                                                                                                                                                                                  | cell                                               |                                                                                         |
| ug2889     | 416                  |                                                                                                                                                                           |                                                                                                                                                                                                  |                                                    |                                                                                         |
| ug2890     | 207                  |                                                                                                                                                                           |                                                                                                                                                                                                  |                                                    |                                                                                         |
| ug2891     | 798                  |                                                                                                                                                                           |                                                                                                                                                                                                  |                                                    |                                                                                         |
| ug2892     | 772                  | GO:0005622,GO:000987,GO:0009056,GO:0005975,GO:0005                                                                                                                        | cellular process,catabolic process                                                                                                                                                               | intracellular                                      | hydrolase activity                                                                      |
| ug2893     | 131                  |                                                                                                                                                                           |                                                                                                                                                                                                  |                                                    |                                                                                         |
| ug2894     | 349                  | GO:0005737,GO:0005576,GO:0016787,GO:0030246,GO:0009536,GO:0016                                                                                                            | carbohydrate metabolic process                                                                                                                                                                   | cellular_component,extracellular region            | hydrolase activity,carbohydrate binding,binding                                         |
| ug2895     | 536                  | GO:0019538,GO:000987,GO:0009987,GO:0005488,GO:0003824                                                                                                                     | protein metabolic process,catabolic process,cellular process,protein modification process                                                                                                        | plastid,membrane                                   |                                                                                         |
| ug2896     | 453                  | GO:0009536                                                                                                                                                                |                                                                                                                                                                                                  |                                                    | catalytic activity                                                                      |
| ug2897     | 441                  | GO:0009536                                                                                                                                                                |                                                                                                                                                                                                  | plastid                                            |                                                                                         |
| ug2898     | 366                  |                                                                                                                                                                           |                                                                                                                                                                                                  |                                                    |                                                                                         |
| ug2899     | 757                  | GO:0005618,GO:0006950,GO:0006259,GO:0005739,GO:0016787,GO:0003677,GO:0016043,GO:0009987,GO:0019538,GO:0000166,GO:0016020,GO:0009536,GO:0005515,GO:0009579,GO:0009058,GO:0 | response to stress,DNA metabolic process,cellular component organization,cellular process,protein metabolic process,biosynthetic process,transport                                               | cell wall,mitochondrion,membrane,plastid,thylakoid | hydrolase activity,DNA binding,nucleotide binding,protein binding,nuclease activity     |
| ug2900     | 710                  |                                                                                                                                                                           |                                                                                                                                                                                                  |                                                    |                                                                                         |
| ug2901     | 496                  |                                                                                                                                                                           |                                                                                                                                                                                                  |                                                    |                                                                                         |
| ug2902     | 628                  |                                                                                                                                                                           |                                                                                                                                                                                                  |                                                    |                                                                                         |
| ug2903     | 549                  | GO:0016787,GO:0016301,GO:0007275,GO:0040007,GO:0004872,GO:0005975,GO:0009987,GO:0009056,GO:0009653,GO:0007165,GO:0000166,GO:0005515,GO:0030154,GO:0009                    | multicellular organismal development,growth,carbohydrate metabolic process,cellular process,catabolic process,anatomical structure morphogenesis,signal transduction,cell differentiation,flower |                                                    | hydrolase activity,kinase activity,receptor activity,nucleotide binding,protein binding |

| Unigene ID | sequence length (bp) | GO-ID                                                                                                                               | Biological process                                                                                                                                                                                                   | Cellular component         | Molecular function                                                           |
|------------|----------------------|-------------------------------------------------------------------------------------------------------------------------------------|----------------------------------------------------------------------------------------------------------------------------------------------------------------------------------------------------------------------|----------------------------|------------------------------------------------------------------------------|
| ug2904     | 155                  |                                                                                                                                     |                                                                                                                                                                                                                      |                            |                                                                              |
| ug2905     | 334                  | GO:0003723,GO:0006139,GO:0005515,GO:0                                                                                               | nucleobase, nucleoside, nucleotide and nucleic acid metabolic process                                                                                                                                                |                            | RNA binding,protein binding,catalytic activity                               |
| ug2906     | 354                  |                                                                                                                                     |                                                                                                                                                                                                                      |                            |                                                                              |
| ug2907     | 722                  | GO:0005840,GO:0005198,GO:0006412                                                                                                    | translation                                                                                                                                                                                                          | ribosome                   | structural molecule activity                                                 |
| ug2908     | 360                  |                                                                                                                                     |                                                                                                                                                                                                                      |                            |                                                                              |
| ug2909     | 373                  |                                                                                                                                     |                                                                                                                                                                                                                      |                            |                                                                              |
| ug2910     | 380                  |                                                                                                                                     |                                                                                                                                                                                                                      |                            |                                                                              |
| ug2911     | 586                  | GO:0016020,GO:0009                                                                                                                  |                                                                                                                                                                                                                      | membrane,plastid           |                                                                              |
| ug2912     | 858                  |                                                                                                                                     |                                                                                                                                                                                                                      |                            |                                                                              |
| ug2913     | 459                  | GO:0016787                                                                                                                          |                                                                                                                                                                                                                      |                            | hydrolase activity                                                           |
| ug2914     | 774                  | GO:0009536,GO:0016020,GO:0009579                                                                                                    |                                                                                                                                                                                                                      | plastid,membrane,thylakoid |                                                                              |
| ug2915     | 820                  |                                                                                                                                     |                                                                                                                                                                                                                      |                            |                                                                              |
| ug2916     | 703                  | GO:0005515                                                                                                                          |                                                                                                                                                                                                                      |                            | protein binding                                                              |
| ug2917     | 628                  |                                                                                                                                     |                                                                                                                                                                                                                      |                            |                                                                              |
| ug2918     | 731                  |                                                                                                                                     |                                                                                                                                                                                                                      |                            |                                                                              |
| ug2919     | 570                  | GO:0006350,GO:0040007,GO:0005634                                                                                                    | transcription,growth                                                                                                                                                                                                 | nucleus                    |                                                                              |
| ug2920     | 369                  |                                                                                                                                     |                                                                                                                                                                                                                      |                            |                                                                              |
| ug2921     | 799                  | GO:0030234,GO:0008152,GO:0009987,GO:0006139,GO:0009058,GO:0019748,GO:0008150,GO:0005488,GO:0006091,GO:0003824,GO:0005515,GO:0009536 | metabolic process,cellular process,nucleobase, nucleoside, nucleotide and nucleic acid metabolic process,biosynthetic process,secondary metabolic process,biological_process,generation of precursor metabolites and | plastid                    | enzyme regulator activity,protein binding,catalytic activity,protein binding |
| ug2922     | 164                  |                                                                                                                                     |                                                                                                                                                                                                                      |                            |                                                                              |
| ug2923     | 540                  |                                                                                                                                     |                                                                                                                                                                                                                      |                            |                                                                              |
| ug2924     | 339                  |                                                                                                                                     |                                                                                                                                                                                                                      |                            |                                                                              |
| ug2925     | 542                  | GO:0008152,GO:0003824,GO:0005488                                                                                                    | metabolic process                                                                                                                                                                                                    |                            | catalytic activity,protein binding                                           |
| ug2926     | 727                  |                                                                                                                                     |                                                                                                                                                                                                                      |                            |                                                                              |
| ug2927     | 712                  |                                                                                                                                     |                                                                                                                                                                                                                      |                            |                                                                              |
| ug2928     | 412                  |                                                                                                                                     |                                                                                                                                                                                                                      |                            |                                                                              |
| ug2929     | 696                  | GO:0016020,GO:0009579,GO:0009536,GO:0005886,GO:0006810,GO:0016787                                                                   | photosynthesis                                                                                                                                                                                                       | membrane,thylakoid,plastid |                                                                              |
| ug2930     | 450                  | GO:0005886,GO:0006810,GO:0016787                                                                                                    | transport                                                                                                                                                                                                            | plasma membrane            | hydrolase activity                                                           |
| ug2931     | 141                  |                                                                                                                                     |                                                                                                                                                                                                                      |                            |                                                                              |
| ug2932     | 348                  | GO:0009058,GO:000987,GO:0009536,GO:0006464                                                                                          | biosynthetic process,cellular process                                                                                                                                                                                | plastid                    | catalytic activity                                                           |
| ug2933     | 767                  | GO:0006464                                                                                                                          | protein modification process                                                                                                                                                                                         |                            |                                                                              |
| ug2934     | 180                  |                                                                                                                                     |                                                                                                                                                                                                                      |                            |                                                                              |
| ug2935     | 772                  | GO:0005515,GO:0005                                                                                                                  |                                                                                                                                                                                                                      | intracellular              | protein binding                                                              |
| ug2936     | 455                  |                                                                                                                                     |                                                                                                                                                                                                                      |                            |                                                                              |
| ug2937     | 719                  | GO:0009536,GO:0003824,GO:0016740,GO:0003677,GO:0006350,GO:0                                                                         | transcription                                                                                                                                                                                                        | mitochondrion              | catalytic activity,transferase activity,DNA binding                          |
| ug2938     | 156                  |                                                                                                                                     |                                                                                                                                                                                                                      |                            |                                                                              |
| ug2939     | 435                  |                                                                                                                                     |                                                                                                                                                                                                                      |                            |                                                                              |
| ug2940     | 719                  | GO:0016020,GO:0009536,GO:0009579                                                                                                    |                                                                                                                                                                                                                      | membrane,plastid,thylakoid |                                                                              |
| ug2941     | 841                  | GO:0005773,GO:0005                                                                                                                  |                                                                                                                                                                                                                      | vacuole,plasma membrane    |                                                                              |
| ug2942     | 676                  |                                                                                                                                     |                                                                                                                                                                                                                      |                            |                                                                              |
| ug2943     | 379                  |                                                                                                                                     |                                                                                                                                                                                                                      |                            |                                                                              |
| ug2944     | 820                  | GO:0009536,GO:0006950,GO:0009628,GO:0005488,GO:0008152,GO:0016020,GO:000957                                                         | response to stress,response to abiotic stimulus,metabolic process                                                                                                                                                    | plastid,membrane,thylakoid | binding                                                                      |
| ug2945     | 711                  | GO:0016787,GO:0003824,GO:0006139,GO:0005840,GO:0005198,GO:0006412                                                                   | nucleobase, nucleoside, nucleotide and nucleic acid metabolic process                                                                                                                                                |                            | hydrolase activity,catalytic activity,kinase activity                        |
| ug2946     | 846                  | GO:0005840,GO:0005198,GO:0006412                                                                                                    | translation                                                                                                                                                                                                          | ribosome                   | structural molecule activity                                                 |
| ug2947     | 659                  | GO:0003824,GO:0008152,GO:0005488                                                                                                    | metabolic process                                                                                                                                                                                                    |                            | catalytic activity,protein binding                                           |
| ug2948     | 854                  |                                                                                                                                     |                                                                                                                                                                                                                      |                            |                                                                              |
| ug2949     | 860                  | GO:0016020,GO:0009536,GO:0006091,GO:0                                                                                               | generation of precursor metabolites and energy,photosynthesis                                                                                                                                                        | membrane,plastid           |                                                                              |
| ug2950     | 525                  |                                                                                                                                     |                                                                                                                                                                                                                      |                            |                                                                              |
| ug2951     | 638                  | GO:0008152,GO:0016740,GO:0009536                                                                                                    | metabolic process                                                                                                                                                                                                    | plastid                    | transferase activity                                                         |
| ug2952     | 681                  | GO:0003676                                                                                                                          |                                                                                                                                                                                                                      |                            | nucleic acid binding                                                         |
| ug2953     | 346                  |                                                                                                                                     |                                                                                                                                                                                                                      |                            |                                                                              |
| ug2954     | 573                  | GO:0005488,GO:0005886,GO:0016301,GO:0                                                                                               | cellular process                                                                                                                                                                                                     | plasma membrane            | binding,kinase activity                                                      |
| ug2955     | 125                  |                                                                                                                                     |                                                                                                                                                                                                                      |                            |                                                                              |
| ug2956     | 830                  |                                                                                                                                     |                                                                                                                                                                                                                      |                            |                                                                              |
| ug2957     | 827                  | GO:0016020,GO:0009536,GO:0009579                                                                                                    |                                                                                                                                                                                                                      | membrane,plastid,thylakoid |                                                                              |

| Unigene ID | sequence length (bp) | GO-ID                                                                                          | Biological process                                                                                   | Cellular component             | Molecular function                                                 |
|------------|----------------------|------------------------------------------------------------------------------------------------|------------------------------------------------------------------------------------------------------|--------------------------------|--------------------------------------------------------------------|
| ug2958     | 872                  |                                                                                                |                                                                                                      |                                |                                                                    |
| ug2959     | 421                  | GO:0016787,GO:0003676,GO:0005622,GO:0005488,GO:0000166                                         |                                                                                                      | intracellular                  | hydrolase activity,nucleic acid binding,binding,nucleotide         |
| ug2960     | 446                  | GO:0016787,GO:0005215,GO:0016020,GO:0006139,GO:0009058,GO:0000166,GO:0005488,GO:0006810,GO:000 | nucleobase, nucleoside, nucleotide and nucleic acid metabolic process,biosynthetic process,transport | membrane,plasma membrane       | hydrolase activity,transporter activity,nucleotide binding,binding |
| ug2961     | 517                  |                                                                                                |                                                                                                      |                                |                                                                    |
| ug2962     | 351                  |                                                                                                |                                                                                                      |                                |                                                                    |
| ug2963     | 855                  | GO:0003824,GO:0003677,GO:0006259                                                               | DNA metabolic process                                                                                |                                | catalytic activity,DNA binding                                     |
| ug2964     | 716                  | GO:0003677,GO:0005488,GO:0005515,GO:0                                                          |                                                                                                      | plastid                        | DNA binding,binding,protein binding                                |
| ug2965     | 491                  |                                                                                                |                                                                                                      |                                |                                                                    |
| ug2966     | 705                  | GO:0009719,GO:0005618,GO:0005488,GO:0000003,GO:0009791,GO:0005886,GO:000727                    | response to endogenous stimulus,reproduction,post-embryonic development,multicellular                | cell wall,plasma membrane      | binding                                                            |
| ug2967     | 111                  |                                                                                                |                                                                                                      |                                |                                                                    |
| ug2968     | 728                  | GO:0019725,GO:0003824,GO:0008152,GO:0                                                          | cellular homeostasis,metabolic process                                                               | mitochondrion                  | catalytic activity                                                 |
| ug2969     | 736                  | GO:0003677,GO:0008                                                                             | cell death                                                                                           |                                | DNA binding                                                        |
| ug2970     | 251                  |                                                                                                |                                                                                                      |                                |                                                                    |
| ug2971     | 793                  |                                                                                                |                                                                                                      |                                |                                                                    |
| ug2972     | 627                  |                                                                                                |                                                                                                      |                                |                                                                    |
| ug2973     | 485                  |                                                                                                |                                                                                                      |                                |                                                                    |
| ug2974     | 488                  | GO:0005488,GO:0003824,GO:0009058,GO:00005737,GO:0006                                           | biosynthetic process protein modification                                                            |                                | binding,catalytic activity,transferase activity                    |
| ug2975     | 685                  | GO:0005515,GO:0009719,GO:0005634                                                               | process,response to endogenous stimulus                                                              | cytoplasm,nucleus              | protein binding                                                    |
| ug2976     | 354                  |                                                                                                |                                                                                                      |                                |                                                                    |
| ug2977     | 109                  |                                                                                                |                                                                                                      |                                |                                                                    |
| ug2978     | 449                  |                                                                                                |                                                                                                      |                                |                                                                    |
| ug2979     | 802                  |                                                                                                |                                                                                                      |                                |                                                                    |
| ug2980     | 600                  | GO:0005198,GO:0005840,GO:0006412,GO:0                                                          | translation                                                                                          | ribosome,mitochondrion         | structural molecule activity                                       |
| ug2981     | 611                  |                                                                                                |                                                                                                      |                                |                                                                    |
| ug2982     | 522                  | GO:0016020,GO:0005                                                                             |                                                                                                      | membrane,plasma membrane       |                                                                    |
| ug2983     | 150                  | GO:0005215,GO:0019725,GO:0006810                                                               | cellular homeostasis,transport                                                                       |                                | transporter activity                                               |
| ug2984     | 565                  | GO:0005739                                                                                     |                                                                                                      | mitochondrion                  |                                                                    |
| ug2985     | 640                  |                                                                                                |                                                                                                      |                                |                                                                    |
| ug2986     | 160                  |                                                                                                |                                                                                                      |                                |                                                                    |
| ug2987     | 755                  | GO:0006464,GO:0019538,GO:0009056,GO:0009987,GO:0003824,GO:0016020,GO:0009                      | protein modification process,protein metabolic process,catabolic process,cellular                    |                                | catalytic activity                                                 |
| ug2988     | 660                  | GO:0005739,GO:0008152,GO:0003824                                                               | metabolic process                                                                                    | membrane,plastid,thylakoid     | catalytic activity                                                 |
| ug2989     | 392                  |                                                                                                |                                                                                                      |                                |                                                                    |
| ug2990     | 757                  |                                                                                                |                                                                                                      |                                |                                                                    |
| ug2991     | 125                  |                                                                                                |                                                                                                      |                                |                                                                    |
| ug2992     | 792                  |                                                                                                |                                                                                                      |                                |                                                                    |
| ug2993     | 534                  | GO:0005515,GO:0005975,GO:0006091,GO:0009056,GO:0003824,GO:0009536                              | carbohydrate metabolic process,generation of precursor metabolites and energy,catabolic process      | plastid                        | protein binding,catalytic activity                                 |
| ug2994     | 786                  | GO:0005739,GO:0016020,GO:0009536                                                               |                                                                                                      | mitochondrion,membrane,plastid |                                                                    |
| ug2995     | 484                  |                                                                                                |                                                                                                      |                                |                                                                    |
| ug2996     | 822                  | GO:0006810,GO:0009                                                                             | transport,cellular process                                                                           |                                |                                                                    |
| ug2997     | 415                  |                                                                                                |                                                                                                      |                                |                                                                    |
| ug2998     | 804                  | GO:0005739                                                                                     |                                                                                                      | mitochondrion                  |                                                                    |
| ug2999     | 512                  |                                                                                                |                                                                                                      |                                |                                                                    |
| ug3000     | 574                  | GO:0005623                                                                                     |                                                                                                      | cell                           |                                                                    |
| ug3001     | 460                  |                                                                                                |                                                                                                      |                                |                                                                    |
| ug3002     | 573                  | GO:0009058,GO:0009987,GO:0009536,GO:0                                                          | biosynthetic process,cellular process                                                                | plastid                        | catalytic activity                                                 |
| ug3003     | 253                  |                                                                                                |                                                                                                      |                                |                                                                    |
| ug3004     | 890                  | GO:0009536                                                                                     |                                                                                                      | plastid                        |                                                                    |
| ug3005     | 691                  | GO:0009579,GO:0005488,GO:0009536                                                               |                                                                                                      | thylakoid,plastid              | binding                                                            |
| ug3006     | 680                  |                                                                                                |                                                                                                      |                                |                                                                    |
| ug3007     | 412                  |                                                                                                |                                                                                                      |                                |                                                                    |

| Unigene ID | sequence length (bp) | GO-ID                                                                                                       | Biological process                                                                                                | Cellular component                       | Molecular function                                                                         |
|------------|----------------------|-------------------------------------------------------------------------------------------------------------|-------------------------------------------------------------------------------------------------------------------|------------------------------------------|--------------------------------------------------------------------------------------------|
| ug3008     | 870                  | GO:0006464,GO:0005618,GO:0005886,GO:0005515,GO:0016301,GO:0000166,GO:000716                                 | protein modification process,signal transduction                                                                  | cell wall,plasma membrane                | protein binding,kinase activity,nucleotide binding                                         |
| ug3009     | 191                  |                                                                                                             |                                                                                                                   |                                          |                                                                                            |
| ug3010     | 393                  | GO:0005739,GO:0006091                                                                                       | generation of precursor metabolites and energy                                                                    | mitochondrion                            |                                                                                            |
| ug3011     | 709                  | GO:0005488                                                                                                  |                                                                                                                   |                                          | binding                                                                                    |
| ug3012     | 671                  | GO:0009719                                                                                                  | response to endogenous stimulus                                                                                   |                                          |                                                                                            |
| ug3013     | 763                  | GO:0005622                                                                                                  |                                                                                                                   | intracellular                            |                                                                                            |
| ug3014     | 879                  | GO:0005488,GO:0008152,GO:0003824,GO:0                                                                       | metabolic process                                                                                                 |                                          | binding,catalytic activity,molecular_function                                              |
| ug3015     | 741                  | GO:0006810                                                                                                  | transport                                                                                                         |                                          |                                                                                            |
| ug3016     | 160                  |                                                                                                             |                                                                                                                   |                                          |                                                                                            |
| ug3017     | 676                  |                                                                                                             |                                                                                                                   |                                          |                                                                                            |
| ug3018     | 522                  |                                                                                                             |                                                                                                                   |                                          |                                                                                            |
| ug3019     | 636                  | GO:0016020,GO:0009536,GO:0009579,GO:00019538,GO:0009                                                        |                                                                                                                   | membrane,plastid,thylakoid,mitochondrion |                                                                                            |
| ug3020     | 812                  | 987,GO:0005515,GO:0007275,GO:0016020,GO:0009536,GO:000957                                                   | protein metabolic process,cellular process,multicellular organismal development                                   | membrane,plastid,thylakoid               | protein binding                                                                            |
| ug3021     | 796                  | GO:0016043,GO:0009987,GO:0005515,GO:0                                                                       | cellular component organization,cellular process                                                                  | cytoskeleton                             | protein binding                                                                            |
| ug3022     | 812                  | GO:0005488,GO:0005                                                                                          |                                                                                                                   | intracellular                            | binding                                                                                    |
| ug3023     | 445                  | GO:0005737,GO:0016                                                                                          |                                                                                                                   | cytoplasm,membrane                       |                                                                                            |
| ug3024     | 771                  | GO:0005886                                                                                                  |                                                                                                                   | plasma membrane                          |                                                                                            |
| ug3025     | 170                  |                                                                                                             |                                                                                                                   |                                          |                                                                                            |
| ug3026     | 397                  |                                                                                                             |                                                                                                                   |                                          |                                                                                            |
| ug3027     | 877                  |                                                                                                             |                                                                                                                   |                                          |                                                                                            |
| ug3028     | 284                  |                                                                                                             |                                                                                                                   |                                          |                                                                                            |
| ug3029     | 394                  |                                                                                                             |                                                                                                                   |                                          |                                                                                            |
| ug3030     | 519                  | GO:0005488,GO:0008152,GO:0009987,GO:0006519,GO:0016740,GO:0008                                              | metabolic process,cellular process,cellular amino acid and derivative metabolic process                           | mitochondrion                            | binding,transferase activity                                                               |
| ug3031     | 182                  | GO:0016740,GO:0008                                                                                          | metabolic process                                                                                                 |                                          | transferase activity                                                                       |
| ug3032     | 240                  |                                                                                                             |                                                                                                                   |                                          |                                                                                            |
| ug3033     | 807                  | GO:0005737                                                                                                  |                                                                                                                   | cytoplasm                                |                                                                                            |
| ug3034     | 476                  |                                                                                                             |                                                                                                                   |                                          |                                                                                            |
| ug3035     | 872                  |                                                                                                             |                                                                                                                   |                                          |                                                                                            |
| ug3036     | 722                  |                                                                                                             |                                                                                                                   |                                          |                                                                                            |
| ug3037     | 801                  | GO:0005623,GO:0005                                                                                          |                                                                                                                   | cell,cytoplasm                           |                                                                                            |
| ug3038     | 548                  |                                                                                                             |                                                                                                                   |                                          |                                                                                            |
| ug3039     | 482                  |                                                                                                             |                                                                                                                   |                                          |                                                                                            |
| ug3040     | 724                  |                                                                                                             |                                                                                                                   |                                          |                                                                                            |
| ug3041     | 616                  |                                                                                                             |                                                                                                                   |                                          |                                                                                            |
| ug3042     | 414                  |                                                                                                             |                                                                                                                   |                                          |                                                                                            |
| ug3043     | 506                  |                                                                                                             |                                                                                                                   |                                          |                                                                                            |
| ug3044     | 779                  | GO:0005623,GO:0005                                                                                          |                                                                                                                   | cell,cytoplasm                           |                                                                                            |
| ug3045     | 521                  |                                                                                                             |                                                                                                                   |                                          |                                                                                            |
| ug3046     | 751                  |                                                                                                             |                                                                                                                   |                                          |                                                                                            |
| ug3047     | 799                  | GO:0016787                                                                                                  |                                                                                                                   |                                          | hydrolase activity                                                                         |
| ug3048     | 772                  |                                                                                                             |                                                                                                                   |                                          |                                                                                            |
| ug3049     | 671                  | GO:0016043,GO:0005515,GO:0005215,GO:0006810,GO:0009987,GO:00016020,GO:000573                                | cellular component organization,transport,cellular process                                                        | membrane,mitochondrion                   | protein binding,transporter activity                                                       |
| ug3050     | 805                  | GO:0005515                                                                                                  |                                                                                                                   |                                          | protein binding                                                                            |
| ug3051     | 339                  |                                                                                                             |                                                                                                                   |                                          |                                                                                            |
| ug3052     | 460                  | GO:0006950,GO:0009628,GO:0005730,GO:0003677,GO:0009719,GO:0003700,GO:0030528,GO:0005515,GO:00019538,GO:0009 | response to stress,response to abiotic stimulus,response to endogenous stimulus,transcription,signal transduction | nucleolus                                | DNA binding,transcription factor activity,transcription regulator activity,protein binding |
| ug3053     | 667                  | 987,GO:0005515                                                                                              | protein metabolic process,cellular process                                                                        |                                          | protein binding                                                                            |
| ug3054     | 252                  |                                                                                                             |                                                                                                                   |                                          |                                                                                            |
| ug3055     | 552                  |                                                                                                             |                                                                                                                   |                                          |                                                                                            |
| ug3056     | 845                  |                                                                                                             |                                                                                                                   |                                          |                                                                                            |
| ug3057     | 930                  |                                                                                                             |                                                                                                                   |                                          |                                                                                            |
| ug3058     | 902                  |                                                                                                             |                                                                                                                   |                                          |                                                                                            |
| ug3059     | 761                  |                                                                                                             |                                                                                                                   |                                          |                                                                                            |
| ug3060     | 759                  | GO:0009536,GO:0003824,GO:0003674,GO:0008152,GO:0005488,GO:00016020,GO:000957                                | metabolic process                                                                                                 | plastid,membrane,thylakoid               | catalytic activity,molecular_function,binding                                              |
| ug3061     | 723                  | GO:0005773,GO:0016                                                                                          |                                                                                                                   | vacuole                                  | transferase activity                                                                       |
| ug3062     | 625                  |                                                                                                             |                                                                                                                   |                                          |                                                                                            |
| ug3063     | 561                  | GO:0005488,GO:0005515,GO:0005886                                                                            |                                                                                                                   | plasma membrane                          | binding,protein binding                                                                    |

| Unigene ID | sequence length (bp) | GO-ID                                                                                                                                      | Biological process                                                                                                                          | Cellular component                                                                    | Molecular function                                                          |
|------------|----------------------|--------------------------------------------------------------------------------------------------------------------------------------------|---------------------------------------------------------------------------------------------------------------------------------------------|---------------------------------------------------------------------------------------|-----------------------------------------------------------------------------|
| ug3064     | 545                  |                                                                                                                                            |                                                                                                                                             |                                                                                       |                                                                             |
| ug3065     | 703                  |                                                                                                                                            |                                                                                                                                             |                                                                                       |                                                                             |
| ug3066     | 383                  | GO:0005739                                                                                                                                 |                                                                                                                                             | mitochondrion                                                                         |                                                                             |
| ug3067     | 571                  |                                                                                                                                            |                                                                                                                                             |                                                                                       |                                                                             |
| ug3068     | 479                  |                                                                                                                                            |                                                                                                                                             |                                                                                       |                                                                             |
| ug3069     | 859                  | GO:0009579,GO:0009536,GO:0005515,GO:0                                                                                                      |                                                                                                                                             | thylakoid,plastid,membrane                                                            | protein binding                                                             |
| ug3070     | 373                  |                                                                                                                                            |                                                                                                                                             |                                                                                       |                                                                             |
| ug3071     | 164                  |                                                                                                                                            |                                                                                                                                             |                                                                                       |                                                                             |
| ug3072     | 171                  |                                                                                                                                            |                                                                                                                                             |                                                                                       |                                                                             |
|            |                      | GO:0006950,GO:0009628,GO:0005488,GO:0                                                                                                      | response to stress,response to abiotic stimulus,protein                                                                                     |                                                                                       |                                                                             |
| ug3073     | 453                  | 006464,GO:0019538,GO:0009056,GO:0009987,GO:0008152,GO:0008150,GO:0003824,GO:                                                               | modification process,protein metabolic process,catabolic process,cellular process,metabolic process,biological process                      | cytosol,intracellular                                                                 | binding,catalytic activity                                                  |
| ug3074     | 468                  |                                                                                                                                            |                                                                                                                                             |                                                                                       |                                                                             |
| ug3075     | 450                  | GO:0006810,GO:000987,GO:0016020,GO:0                                                                                                       | transport,cellular process                                                                                                                  | membrane,endosome                                                                     |                                                                             |
| ug3076     | 131                  |                                                                                                                                            |                                                                                                                                             |                                                                                       |                                                                             |
|            |                      | GO:0006810,GO:000987,GO:0005623,GO:016020,GO:0005515                                                                                       | transport,cellular process                                                                                                                  | cell,membrane                                                                         | protein binding                                                             |
| ug3078     | 304                  |                                                                                                                                            |                                                                                                                                             |                                                                                       |                                                                             |
| ug3079     | 400                  |                                                                                                                                            |                                                                                                                                             |                                                                                       |                                                                             |
| ug3080     | 388                  |                                                                                                                                            |                                                                                                                                             |                                                                                       |                                                                             |
| ug3081     | 314                  | GO:0003824,GO:0000166                                                                                                                      |                                                                                                                                             |                                                                                       | catalytic activity,nucleotide binding                                       |
| ug3082     | 265                  | GO:0003677,GO:0006350,GO:0005634                                                                                                           | transcription                                                                                                                               | nucleus                                                                               | DNA binding                                                                 |
| ug3083     | 195                  |                                                                                                                                            |                                                                                                                                             |                                                                                       |                                                                             |
| ug3084     | 313                  |                                                                                                                                            |                                                                                                                                             |                                                                                       |                                                                             |
| ug3085     | 399                  | GO:0008150                                                                                                                                 | biological_process                                                                                                                          |                                                                                       |                                                                             |
| ug3086     | 457                  | GO:0005488                                                                                                                                 |                                                                                                                                             |                                                                                       | binding                                                                     |
| ug3087     | 238                  |                                                                                                                                            |                                                                                                                                             |                                                                                       |                                                                             |
| ug3088     | 372                  | GO:0005488                                                                                                                                 |                                                                                                                                             |                                                                                       | binding                                                                     |
| ug3089     | 295                  |                                                                                                                                            |                                                                                                                                             |                                                                                       |                                                                             |
| ug3090     | 458                  | GO:0016787                                                                                                                                 |                                                                                                                                             |                                                                                       | hydrolase activity                                                          |
| ug3091     | 443                  |                                                                                                                                            |                                                                                                                                             |                                                                                       |                                                                             |
|            |                      | GO:0007165,GO:0009719,GO:0030528,GO:004871,GO:0005515,GO:0005634,GO:000635                                                                 | signal transduction,response to endogenous stimulus,transcription                                                                           | nucleus                                                                               | transcription regulator activity,signal transducer activity,protein binding |
| ug3092     | 412                  |                                                                                                                                            |                                                                                                                                             |                                                                                       |                                                                             |
| ug3093     | 465                  | GO:0005576                                                                                                                                 |                                                                                                                                             | extracellular region                                                                  |                                                                             |
| ug3094     | 404                  | GO:0005623,GO:0019538,GO:0009056,GO:0009653,GO:0030154,GO:0007275,GO:0                                                                     | protein metabolic process,catabolic process,cellular process anatomical structure morphogenesis,cell                                        | cell                                                                                  |                                                                             |
| ug3095     | 479                  | 005794,GO:0016043,GO:0016049,GO:0016020,GO:0005783                                                                                         | differentiation,multicellular organismal development,cellular component organization,cell                                                   | Golgi apparatus,membrane,endoplasmic reticulum                                        |                                                                             |
| ug3096     | 444                  |                                                                                                                                            |                                                                                                                                             |                                                                                       |                                                                             |
| ug3097     | 145                  |                                                                                                                                            |                                                                                                                                             |                                                                                       |                                                                             |
| ug3098     | 478                  |                                                                                                                                            |                                                                                                                                             |                                                                                       |                                                                             |
| ug3099     | 430                  | GO:0009536                                                                                                                                 |                                                                                                                                             | plastid                                                                               |                                                                             |
| ug3100     | 462                  |                                                                                                                                            |                                                                                                                                             |                                                                                       |                                                                             |
| ug3101     | 432                  |                                                                                                                                            |                                                                                                                                             |                                                                                       |                                                                             |
| ug3102     | 390                  |                                                                                                                                            |                                                                                                                                             |                                                                                       |                                                                             |
| ug3103     | 379                  |                                                                                                                                            |                                                                                                                                             |                                                                                       |                                                                             |
| ug3104     | 428                  |                                                                                                                                            |                                                                                                                                             |                                                                                       |                                                                             |
| ug3105     | 427                  |                                                                                                                                            |                                                                                                                                             |                                                                                       |                                                                             |
| ug3106     | 461                  | GO:0005975,GO:0005618,GO:0016787,GO:00016020,GO:0005635,GO:0005768,GO:0                                                                    | carbohydrate metabolic process                                                                                                              | cell wall,membrane                                                                    | hydrolase activity                                                          |
| ug3107     | 457                  | 000166,GO:0006810,GO:0009987,GO:0005886,GO:0009719,GO:0005623,GO:0005829,GO:0006810,GO:0006091,GO:0006139,GO:0009058,GO:0016020,GO:0005215 | transport,cellular process,response to endogenous stimulus                                                                                  | membrane,nuclear envelope,endosome,plasma membrane,cell,cytosol,endoplasmic reticulum | nucleotide binding                                                          |
| ug3108     | 445                  | GO:0005618,GO:0005576,GO:0005618,GO:0005576                                                                                                | transport,generation of precursor metabolites and energy,nucleobase, nucleoside, nucleotide and nucleic acid metabolic process,biosynthetic | membrane                                                                              | transporter activity                                                        |
| ug3109     | 483                  | 576,GO:0019538,GO:0009056,GO:0016787                                                                                                       | protein metabolic process,catabolic process                                                                                                 | cell wall,extracellular region                                                        | hydrolase activity                                                          |
| ug3110     | 468                  |                                                                                                                                            |                                                                                                                                             |                                                                                       |                                                                             |

| Unigene ID | sequence length (bp) | GO-ID                                                                                                        | Biological process                                                                                                                  | Cellular component             | Molecular function                                                         |
|------------|----------------------|--------------------------------------------------------------------------------------------------------------|-------------------------------------------------------------------------------------------------------------------------------------|--------------------------------|----------------------------------------------------------------------------|
| ug3111     | 438                  | GO:0005515,GO:0005215,GO:0016020,GO:0006810,GO:0009987,GO:0016043,GO:000953                                  | transport,cellular process,cellular component organization                                                                          | membrane,plastid,thylakoid     | protein binding,transporter activity                                       |
| ug3112     | 330                  |                                                                                                              |                                                                                                                                     |                                |                                                                            |
| ug3113     | 234                  |                                                                                                              |                                                                                                                                     |                                |                                                                            |
| ug3114     | 361                  | GO:0006810,GO:0016020,GO:0005215                                                                             | transport                                                                                                                           | membrane                       | transporter activity                                                       |
| ug3115     | 475                  |                                                                                                              |                                                                                                                                     |                                |                                                                            |
| ug3116     | 203                  |                                                                                                              |                                                                                                                                     |                                |                                                                            |
| ug3117     | 149                  |                                                                                                              |                                                                                                                                     |                                |                                                                            |
| ug3118     | 344                  |                                                                                                              |                                                                                                                                     |                                |                                                                            |
| ug3119     | 476                  |                                                                                                              |                                                                                                                                     |                                |                                                                            |
| ug3120     | 285                  |                                                                                                              |                                                                                                                                     |                                |                                                                            |
| ug3121     | 515                  | GO:0005975,GO:000987,GO:0016787,GO:0005576,GO:0005618,G                                                      | carbohydrate metabolic process,cellular process                                                                                     | extracellular region,cell wall | hydrolase activity,transferase activity                                    |
| ug3122     | 169                  |                                                                                                              |                                                                                                                                     |                                |                                                                            |
| ug3123     | 397                  | GO:0016301,GO:0005829,GO:0000166,GO:0005975,GO:0006091,GO:0009056                                            | carbohydrate metabolic process,generation of precursor metabolites and energy,catabolic process                                     | cytosol                        | kinase activity,nucleotide binding                                         |
| ug3124     | 113                  |                                                                                                              |                                                                                                                                     |                                |                                                                            |
| ug3125     | 473                  |                                                                                                              |                                                                                                                                     |                                |                                                                            |
| ug3126     | 443                  | GO:0003824,GO:0009446,GO:0005773                                                                             |                                                                                                                                     | plastid vacuole                | catalytic activity                                                         |
| ug3127     | 454                  | GO:0003824,GO:0005829,GO:0016787,GO:0016740,GO:0005975,GO:0                                                  | carbohydrate metabolic process                                                                                                      |                                | catalytic activity,binding hydrolase activity,transferase activity,binding |
| ug3128     | 343                  |                                                                                                              |                                                                                                                                     |                                |                                                                            |
| ug3129     | 407                  |                                                                                                              |                                                                                                                                     |                                |                                                                            |
| ug3130     | 407                  |                                                                                                              |                                                                                                                                     |                                |                                                                            |
| ug3131     | 407                  |                                                                                                              |                                                                                                                                     |                                |                                                                            |
| ug3132     | 385                  | GO:0005975,GO:000987,GO:0008150,GO:0016740,GO:0005739,GO:0000166,GO:0006091,GO:0009056,GO:0005975,GO:0003824 | carbohydrate metabolic process,cellular process,biological_process,generation of precursor metabolites and energy,catabolic process | mitochondrion,plastid          | transferase activity,nucleotide binding,catalytic activity                 |
| ug3133     | 414                  | GO:0003824                                                                                                   |                                                                                                                                     |                                | catalytic activity                                                         |
| ug3134     | 567                  |                                                                                                              |                                                                                                                                     |                                |                                                                            |
| ug3135     | 456                  |                                                                                                              |                                                                                                                                     |                                |                                                                            |
| ug3136     | 557                  |                                                                                                              |                                                                                                                                     |                                |                                                                            |
| ug3137     | 313                  |                                                                                                              |                                                                                                                                     |                                |                                                                            |
| ug3138     | 400                  | GO:0005488,GO:0008515,GO:0005488,GO:0005376                                                                  | biological_process                                                                                                                  |                                | binding                                                                    |
| ug3139     | 515                  |                                                                                                              |                                                                                                                                     |                                | binding,protein binding                                                    |
| ug3140     | 376                  |                                                                                                              |                                                                                                                                     |                                |                                                                            |
| ug3141     | 372                  | GO:0009987,GO:000987,GO:0003674,GO:0006519,GO:0005739                                                        | cellular process,catabolic process,cellular amino acid and derivative metabolic process                                             | mitochondrion                  | molecular_function                                                         |
| ug3142     | 458                  |                                                                                                              |                                                                                                                                     |                                |                                                                            |
| ug3143     | 497                  | GO:0016020,GO:0005125                                                                                        |                                                                                                                                     | membrane                       | binding                                                                    |
| ug3144     | 125                  |                                                                                                              |                                                                                                                                     |                                |                                                                            |
| ug3145     | 410                  |                                                                                                              |                                                                                                                                     |                                |                                                                            |
| ug3146     | 386                  |                                                                                                              |                                                                                                                                     |                                |                                                                            |
| ug3147     | 525                  |                                                                                                              |                                                                                                                                     |                                |                                                                            |
| ug3148     | 529                  |                                                                                                              |                                                                                                                                     |                                |                                                                            |
| ug3149     | 136                  |                                                                                                              |                                                                                                                                     |                                |                                                                            |
| ug3150     | 558                  | GO:0006464,GO:0005488,GO:0000166,GO:0005886                                                                  | protein modification process                                                                                                        | plasma membrane                | binding,nucleotide binding,kinase activity                                 |
| ug3151     | 367                  |                                                                                                              |                                                                                                                                     |                                |                                                                            |
| ug3152     | 600                  | GO:0009058,GO:000987,GO:0006629,GO:0005488,GO:0008152,GO:0003824,GO:000578                                   | biosynthetic process,cellular process,lipid metabolic process,metabolic process                                                     | endoplasmic reticulum          | binding,catalytic activity                                                 |
| ug3153     | 113                  |                                                                                                              |                                                                                                                                     |                                |                                                                            |
| ug3154     | 519                  |                                                                                                              |                                                                                                                                     |                                |                                                                            |
| ug3155     | 455                  | GO:0008289,GO:0006508                                                                                        | transport                                                                                                                           |                                | lipid binding                                                              |
| ug3156     | 508                  |                                                                                                              |                                                                                                                                     |                                |                                                                            |
| ug3157     | 433                  |                                                                                                              |                                                                                                                                     |                                |                                                                            |
| ug3158     | 374                  |                                                                                                              |                                                                                                                                     |                                |                                                                            |
| ug3159     | 218                  |                                                                                                              |                                                                                                                                     |                                |                                                                            |
| ug3160     | 100                  |                                                                                                              |                                                                                                                                     |                                |                                                                            |
| ug3161     | 118                  |                                                                                                              |                                                                                                                                     |                                |                                                                            |
| ug3162     | 424                  | GO:0008135,GO:0006412,GO:0030528,GO:0005488,GO:0016043,GO:0006350,GO:000565                                  | translation,cellular component organization,transcription                                                                           | nucleoplasm                    | translation factor activity, nucleic acid binding,transcription regulator  |
| ug3163     | 228                  |                                                                                                              |                                                                                                                                     |                                |                                                                            |
| ug3164     | 279                  |                                                                                                              |                                                                                                                                     |                                |                                                                            |
| ug3165     | 217                  |                                                                                                              |                                                                                                                                     |                                |                                                                            |
| ug3166     | 430                  |                                                                                                              |                                                                                                                                     |                                |                                                                            |
| ug3167     | 365                  |                                                                                                              |                                                                                                                                     |                                |                                                                            |

| Unigene ID | sequence length (bp) | GO-ID                                                                                                                                                                           | Biological process                                                                                                                                                                                 | Cellular component                                  | Molecular function                                                 |
|------------|----------------------|---------------------------------------------------------------------------------------------------------------------------------------------------------------------------------|----------------------------------------------------------------------------------------------------------------------------------------------------------------------------------------------------|-----------------------------------------------------|--------------------------------------------------------------------|
| ug3168     | 476                  | GO:0005737,GO:0005198,GO:0009987,GO:000166,GO:0005856,GO:0016043,GO:0006950,GO:0009628,GO:001                                                                                   | cellular process,cellular component organization,response to stress,response to abiotic stimulus                                                                                                   | cytoplasm,cytoskeleton                              | structural molecule activity,nucleotide binding,hydrolase activity |
| ug3170     | 519                  |                                                                                                                                                                                 |                                                                                                                                                                                                    |                                                     |                                                                    |
| ug3171     | 511                  |                                                                                                                                                                                 |                                                                                                                                                                                                    |                                                     |                                                                    |
| ug3172     | 142                  |                                                                                                                                                                                 |                                                                                                                                                                                                    |                                                     |                                                                    |
| ug3173     | 123                  |                                                                                                                                                                                 |                                                                                                                                                                                                    |                                                     |                                                                    |
| ug3174     | 577                  | GO:0005515,GO:0009000003,GO:0009653,GO:0009791,GO:0009790                                                                                                                       | reproduction,anatomical structure morphogenesis,post-embryonic development,embryonic                                                                                                               | plastid                                             | protein binding                                                    |
| ug3175     | 570                  |                                                                                                                                                                                 |                                                                                                                                                                                                    |                                                     |                                                                    |
| ug3176     | 152                  |                                                                                                                                                                                 |                                                                                                                                                                                                    |                                                     |                                                                    |
| ug3177     | 577                  |                                                                                                                                                                                 |                                                                                                                                                                                                    |                                                     |                                                                    |
| ug3178     | 407                  | GO:0016301                                                                                                                                                                      |                                                                                                                                                                                                    |                                                     | kinase activity                                                    |
| ug3179     | 408                  |                                                                                                                                                                                 |                                                                                                                                                                                                    |                                                     |                                                                    |
| ug3180     | 192                  |                                                                                                                                                                                 |                                                                                                                                                                                                    |                                                     |                                                                    |
| ug3181     | 574                  | GO:0006950,GO:000886,GO:0019725,GO:003824,GO:0005783,G                                                                                                                          | response to stress,cellular homeostasis                                                                                                                                                            | plasma membrane,endoplasmic reticulum,mitochondrion | catalytic activity                                                 |
| ug3182     | 543                  |                                                                                                                                                                                 |                                                                                                                                                                                                    |                                                     |                                                                    |
| ug3183     | 303                  |                                                                                                                                                                                 |                                                                                                                                                                                                    |                                                     |                                                                    |
| ug3184     | 507                  |                                                                                                                                                                                 |                                                                                                                                                                                                    |                                                     |                                                                    |
| ug3185     | 456                  | GO:0016020,GO:0005618,GO:0019538,GO:0009056,GO:0016787                                                                                                                          | protein metabolic process,catabolic process                                                                                                                                                        | membrane,cell wall                                  | hydrolase activity                                                 |
| ug3186     | 585                  |                                                                                                                                                                                 |                                                                                                                                                                                                    |                                                     |                                                                    |
| ug3187     | 194                  |                                                                                                                                                                                 |                                                                                                                                                                                                    |                                                     |                                                                    |
| ug3188     | 455                  |                                                                                                                                                                                 |                                                                                                                                                                                                    |                                                     |                                                                    |
| ug3189     | 535                  | GO:0005829,GO:0005488,GO:0006950,GO:00019725                                                                                                                                    | response to stress,response to abiotic stimulus cellular homeostasis                                                                                                                               | cytosol                                             | binding                                                            |
| ug3190     | 400                  |                                                                                                                                                                                 |                                                                                                                                                                                                    |                                                     |                                                                    |
| ug3191     | 516                  |                                                                                                                                                                                 |                                                                                                                                                                                                    |                                                     |                                                                    |
| ug3192     | 129                  |                                                                                                                                                                                 |                                                                                                                                                                                                    |                                                     |                                                                    |
| ug3193     | 579                  | GO:0008152,GO:0005739,GO:0000166,GO:000                                                                                                                                         | metabolic process                                                                                                                                                                                  | mitochondrion                                       | nucleotide binding,catalytic activity                              |
| ug3194     | 452                  |                                                                                                                                                                                 |                                                                                                                                                                                                    |                                                     |                                                                    |
| ug3195     | 501                  | GO:0005737,GO:0009058,GO:0009987,GO:0006629,GO:0003824,GO:0008150,GO:0016020,GO:0006950,GO:0009628,GO:0008150,GO:0003824,GO:0008152,GO:0000166,GO:0009530,GO:0016301,GO:0016740 | biosynthetic process,cellular process,lipid metabolic process,biological_process,response to abiotic stimulus response to stress,response to abiotic stimulus,biological_process,metabolic process | cytoplasm,membrane                                  | catalytic activity                                                 |
| ug3196     | 504                  |                                                                                                                                                                                 |                                                                                                                                                                                                    |                                                     |                                                                    |
| ug3197     | 459                  |                                                                                                                                                                                 |                                                                                                                                                                                                    |                                                     |                                                                    |
| ug3198     | 387                  | GO:0030246                                                                                                                                                                      |                                                                                                                                                                                                    |                                                     | kinase activity,transferase activity carbohydrate binding          |
| ug3199     | 540                  | GO:0003700,GO:0005634,GO:0006350                                                                                                                                                | transcription                                                                                                                                                                                      | nucleus                                             | transcription factor activity                                      |
| ug3200     | 568                  |                                                                                                                                                                                 |                                                                                                                                                                                                    |                                                     |                                                                    |
| ug3201     | 108                  |                                                                                                                                                                                 |                                                                                                                                                                                                    |                                                     |                                                                    |
| ug3202     | 392                  |                                                                                                                                                                                 |                                                                                                                                                                                                    |                                                     |                                                                    |
| ug3203     | 275                  |                                                                                                                                                                                 |                                                                                                                                                                                                    |                                                     |                                                                    |
| ug3204     | 346                  |                                                                                                                                                                                 |                                                                                                                                                                                                    |                                                     |                                                                    |
| ug3205     | 414                  | GO:0005618,GO:0005151,GO:0005886,GO:0009536,GO:0005634,GO:0009719,GO:000716                                                                                                     | response to endogenous stimulus,signal transduction                                                                                                                                                | cell wall,plasma membrane,plastid,nucleus           | protein binding                                                    |
| ug3206     | 490                  |                                                                                                                                                                                 |                                                                                                                                                                                                    |                                                     |                                                                    |
| ug3207     | 393                  |                                                                                                                                                                                 |                                                                                                                                                                                                    |                                                     |                                                                    |
| ug3208     | 380                  |                                                                                                                                                                                 |                                                                                                                                                                                                    |                                                     |                                                                    |
| ug3209     | 410                  | GO:0004872,GO:001020,GO:0005783,GO:0005488,GO:0009987,G                                                                                                                         | cellular process,transport                                                                                                                                                                         | membrane,endoplasmic reticulum                      | receptor activity,binding                                          |
| ug3210     | 547                  |                                                                                                                                                                                 |                                                                                                                                                                                                    |                                                     |                                                                    |
| ug3211     | 429                  | GO:0008152,GO:0003824,GO:0008150                                                                                                                                                | metabolic process,biological_process                                                                                                                                                               |                                                     | catalytic activity                                                 |
| ug3212     | 423                  |                                                                                                                                                                                 |                                                                                                                                                                                                    |                                                     |                                                                    |
| ug3213     | 357                  |                                                                                                                                                                                 |                                                                                                                                                                                                    |                                                     |                                                                    |
| ug3214     | 203                  |                                                                                                                                                                                 |                                                                                                                                                                                                    |                                                     |                                                                    |
| ug3215     | 262                  |                                                                                                                                                                                 |                                                                                                                                                                                                    |                                                     |                                                                    |
| ug3216     | 429                  |                                                                                                                                                                                 |                                                                                                                                                                                                    |                                                     |                                                                    |
| ug3217     | 413                  | GO:0003677,GO:0006350,GO:0005634                                                                                                                                                | transcription                                                                                                                                                                                      | nucleus                                             | DNA binding                                                        |
| ug3218     | 430                  | GO:0005737,GO:0005111                                                                                                                                                           |                                                                                                                                                                                                    | cytoplasm,cell wall                                 |                                                                    |
| ug3219     | 111                  |                                                                                                                                                                                 |                                                                                                                                                                                                    |                                                     |                                                                    |
| ug3220     | 369                  |                                                                                                                                                                                 |                                                                                                                                                                                                    |                                                     |                                                                    |



| Unigene ID | sequence length (bp) | GO-ID                                                                                                                           | Biological process                                                                                                                                             | Cellular component                            | Molecular function                                                           |
|------------|----------------------|---------------------------------------------------------------------------------------------------------------------------------|----------------------------------------------------------------------------------------------------------------------------------------------------------------|-----------------------------------------------|------------------------------------------------------------------------------|
| ug3221     | 578                  |                                                                                                                                 |                                                                                                                                                                |                                               |                                                                              |
| ug3222     | 107                  |                                                                                                                                 |                                                                                                                                                                |                                               |                                                                              |
| ug3223     | 187                  |                                                                                                                                 |                                                                                                                                                                |                                               |                                                                              |
| ug3224     | 114                  |                                                                                                                                 |                                                                                                                                                                |                                               |                                                                              |
| ug3225     | 423                  |                                                                                                                                 |                                                                                                                                                                |                                               |                                                                              |
| ug3226     | 491                  | GO:0019725,GO:0003824,GO:0005488,GO:0005622,GO:0005886,GO:0019538,GO:0009056,GO:0009987,GO:0005634,GO:0005829,GO:0016787,GO:000 | cellular homeostasis,transport<br>protein metabolic process,catabolic process,cellular process,response to stress,response to abiotic stimulus                 | intracellular,plasma membrane,nucleus,cytosol | catalytic activity,binding<br>hydrolase activity                             |
| ug3227     | 281                  |                                                                                                                                 |                                                                                                                                                                |                                               |                                                                              |
| ug3228     | 109                  |                                                                                                                                 |                                                                                                                                                                |                                               |                                                                              |
| ug3229     | 162                  |                                                                                                                                 |                                                                                                                                                                |                                               |                                                                              |
| ug3230     | 421                  | GO:0019725,GO:0005783,GO:0003824,GO:0006091,GO:0009                                                                             | cellular homeostasis<br>generation of precursor metabolites and energy,catabolic process                                                                       | endoplasmic reticulum                         | catalytic activity<br>catalytic activity,binding,transferase activity        |
| ug3231     | 441                  | 056,GO:0003824,GO:0005488,GO:0016740                                                                                            |                                                                                                                                                                |                                               |                                                                              |
| ug3232     | 501                  | GO:0009058,GO:0006139,GO:0016301                                                                                                | biosynthetic process,nucleobase, nucleoside, nucleotide and nucleic acid metabolic process                                                                     |                                               | kinase activity                                                              |
| ug3233     | 389                  |                                                                                                                                 |                                                                                                                                                                |                                               |                                                                              |
| ug3234     | 404                  |                                                                                                                                 |                                                                                                                                                                |                                               |                                                                              |
| ug3235     | 457                  |                                                                                                                                 |                                                                                                                                                                |                                               |                                                                              |
| ug3236     | 498                  | GO:0005488,GO:0008488,GO:0008152,GO:0003824,GO:0009058,GO:0006091,GO:0009056,GO:000166,GO:0009536                               | metabolic process,biosynthetic process,cellular amino acid and derivative metabolic process,generation of precursor metabolites and energy,catabolic process   | mitochondrion,plastid                         | binding,lipid binding<br>binding,catalytic activity,nucleotide binding       |
| ug3237     | 411                  |                                                                                                                                 |                                                                                                                                                                |                                               |                                                                              |
| ug3238     | 414                  |                                                                                                                                 |                                                                                                                                                                |                                               |                                                                              |
| ug3239     | 415                  | GO:0009605,GO:0006950,GO:0006350,GO:0016301,GO:0005515,GO:0007165,GO:000960                                                     | response to external stimulus,response to stress,transcription,signal transduction,response to biotic stimulus,protein modification                            | mitochondrion                                 | kinase activity,protein binding,enzyme regulator activity,nucleotide binding |
| ug3240     | 378                  | 7,GO:0030234,GO:0006464,GO:0009058,GO:0006519,GO:0009987,GO:0019748,GO:0009628,GO:0006810,GO:000                                | process,cellular amino acid and derivative metabolic process,cellular process,secondary cellular amino acid and derivative metabolic process,metabolic process |                                               |                                                                              |
| ug3241     | 539                  | GO:0005488,GO:0006519,GO:0016740,GO:0008152,GO:0009987,GO:0009987,GO:0005                                                       |                                                                                                                                                                |                                               |                                                                              |
| ug3242     | 498                  |                                                                                                                                 |                                                                                                                                                                |                                               |                                                                              |
| ug3243     | 412                  | 575,GO:0000166,GO:0016043,GO:0005198,GO:0016787,GO:000585                                                                       | cellular process,cellular component organization                                                                                                               | cellular_component,cytoskeleton               | nucleotide binding,structural molecule activity,hydrolase activity           |
| ug3244     | 183                  | GO:0005886                                                                                                                      |                                                                                                                                                                | plasma membrane                               |                                                                              |
| ug3245     | 591                  | GO:0016740                                                                                                                      |                                                                                                                                                                |                                               | transferase activity                                                         |
| ug3246     | 246                  |                                                                                                                                 |                                                                                                                                                                |                                               |                                                                              |
| ug3247     | 389                  | GO:0016787,GO:0005634,GO:0006464                                                                                                | protein modification process                                                                                                                                   | nucleus                                       | hydrolase activity                                                           |
| ug3248     | 412                  | GO:0005737,GO:0005488,GO:0005515                                                                                                |                                                                                                                                                                | cytoplasm                                     | binding,protein binding                                                      |
| ug3249     | 386                  | GO:0005623                                                                                                                      |                                                                                                                                                                | cell                                          |                                                                              |
| ug3250     | 504                  | GO:0005840,GO:0005198,GO:0006412,GO:000                                                                                         | translation                                                                                                                                                    | ribosome                                      | structural molecule activity,nucleotide binding                              |
| ug3251     | 254                  |                                                                                                                                 |                                                                                                                                                                |                                               |                                                                              |
| ug3252     | 270                  |                                                                                                                                 |                                                                                                                                                                |                                               |                                                                              |
| ug3253     | 394                  |                                                                                                                                 |                                                                                                                                                                |                                               |                                                                              |
| ug3254     | 391                  | GO:0005737,GO:0005488,GO:0008152,GO:0003824                                                                                     | metabolic process                                                                                                                                              | cytoplasm,plasma membrane                     | binding,catalytic activity                                                   |
| ug3255     | 442                  |                                                                                                                                 |                                                                                                                                                                |                                               |                                                                              |
| ug3256     | 299                  |                                                                                                                                 |                                                                                                                                                                |                                               |                                                                              |
| ug3257     | 155                  |                                                                                                                                 |                                                                                                                                                                |                                               |                                                                              |
| ug3258     | 511                  | GO:0016301,GO:0005829,GO:0000166,GO:0005975,GO:0006091,GO:0009056                                                               | carbohydrate metabolic process,generation of precursor metabolites and energy,catabolic process                                                                | cytosol                                       | kinase activity,nucleotide binding                                           |
| ug3259     | 323                  | GO:0016787                                                                                                                      |                                                                                                                                                                |                                               | hydrolase activity                                                           |
| ug3260     | 183                  |                                                                                                                                 |                                                                                                                                                                |                                               |                                                                              |
| ug3261     | 353                  | GO:0016301,GO:0005515,GO:0007275,GO:000                                                                                         | multicellular organismal development,cell cycle                                                                                                                |                                               | kinase activity,protein binding                                              |
| ug3262     | 232                  |                                                                                                                                 |                                                                                                                                                                |                                               |                                                                              |
| ug3263     | 491                  |                                                                                                                                 |                                                                                                                                                                |                                               |                                                                              |



| Unigene ID | sequence length (bp) | GO-ID                                                                                  | Biological process                                                                           | Cellular component             | Molecular function                                               |
|------------|----------------------|----------------------------------------------------------------------------------------|----------------------------------------------------------------------------------------------|--------------------------------|------------------------------------------------------------------|
| ug3318     | 477                  |                                                                                        |                                                                                              |                                |                                                                  |
| ug3319     | 401                  |                                                                                        |                                                                                              |                                |                                                                  |
| ug3320     | 488                  |                                                                                        |                                                                                              |                                |                                                                  |
| ug3321     | 283                  |                                                                                        |                                                                                              |                                |                                                                  |
| ug3322     | 479                  |                                                                                        |                                                                                              |                                |                                                                  |
| ug3323     | 488                  | GO:0016020,GO:0006810,GO:0005215                                                       | transport                                                                                    | membrane                       | transporter activity                                             |
| ug3324     | 468                  | GO:0000166,GO:0016020,GO:0008152,GO:0005488,GO:0003824,GO:0003674,GO:000588            | metabolic process                                                                            | membrane,plasma membrane       | nucleotide binding,binding,catalytic activity,molecular_function |
| ug3325     | 474                  |                                                                                        |                                                                                              |                                |                                                                  |
| ug3326     | 455                  |                                                                                        |                                                                                              |                                |                                                                  |
| ug3327     | 498                  | GO:0005488                                                                             |                                                                                              |                                | binding                                                          |
| ug3328     | 384                  |                                                                                        |                                                                                              |                                |                                                                  |
| ug3329     | 507                  | GO:0006350,GO:0003700,GO:0005488                                                       | transcription                                                                                |                                | transcription factor activity,binding                            |
| ug3330     | 424                  |                                                                                        |                                                                                              |                                |                                                                  |
| ug3331     | 450                  | GO:0016301,GO:0006350,GO:0009058,GO:0005975,GO:0009987,GO:0005488                      | transcription,biosynthetic process,carbohydrate metabolic process,cellular process           | nucleus                        | kinase activity                                                  |
| ug3332     | 455                  |                                                                                        |                                                                                              |                                |                                                                  |
| ug3333     | 355                  |                                                                                        |                                                                                              |                                |                                                                  |
| ug3334     | 482                  | GO:0030246,GO:0005975,GO:0009987,GO:0005488                                            | carbohydrate metabolic process,cellular process                                              |                                | carbohydrate binding,catalytic activity                          |
| ug3335     | 448                  |                                                                                        |                                                                                              |                                |                                                                  |
| ug3336     | 425                  | GO:0008150,GO:0005488,GO:0005777,GO:0016740,GO:0006519,GO:0009058,GO:001602            | biological_process,cellular amino acid and derivative metabolic process,biosynthetic process | peroxisome,membrane,plastid    | binding,transferase activity                                     |
| ug3337     | 432                  |                                                                                        |                                                                                              |                                |                                                                  |
| ug3338     | 359                  | GO:0003824,GO:0000166                                                                  |                                                                                              |                                | catalytic activity,nucleotide binding                            |
| ug3339     | 455                  |                                                                                        |                                                                                              |                                |                                                                  |
| ug3340     | 134                  |                                                                                        |                                                                                              |                                |                                                                  |
| ug3341     | 348                  |                                                                                        |                                                                                              |                                |                                                                  |
| ug3342     | 469                  | GO:0016020,GO:0006810,GO:0005215                                                       | transport                                                                                    | membrane                       | transporter activity                                             |
| ug3343     | 487                  | GO:0016020,GO:0003824,GO:0005488                                                       |                                                                                              | membrane                       | catalytic activity,binding                                       |
| ug3344     | 139                  |                                                                                        |                                                                                              |                                |                                                                  |
| ug3345     | 502                  |                                                                                        |                                                                                              |                                |                                                                  |
| ug3346     | 514                  |                                                                                        |                                                                                              |                                |                                                                  |
| ug3347     | 464                  |                                                                                        |                                                                                              |                                |                                                                  |
| ug3348     | 466                  |                                                                                        |                                                                                              |                                |                                                                  |
| ug3349     | 172                  |                                                                                        |                                                                                              |                                |                                                                  |
| ug3350     | 486                  |                                                                                        |                                                                                              |                                |                                                                  |
| ug3351     | 485                  |                                                                                        |                                                                                              |                                |                                                                  |
| ug3352     | 441                  | GO:0003676,GO:0000166,GO:0016787                                                       |                                                                                              |                                | nucleic acid binding,nucleotide                                  |
| ug3353     | 482                  |                                                                                        |                                                                                              |                                |                                                                  |
| ug3354     | 474                  | GO:0016740                                                                             |                                                                                              |                                | transferase activity                                             |
| ug3355     | 473                  |                                                                                        |                                                                                              |                                |                                                                  |
| ug3356     | 432                  | GO:0003824,GO:0005488,GO:0009536                                                       |                                                                                              | plastid                        | catalytic activity,binding                                       |
| ug3357     | 416                  |                                                                                        |                                                                                              |                                |                                                                  |
| ug3358     | 469                  |                                                                                        |                                                                                              |                                |                                                                  |
| ug3359     | 441                  | GO:0006950,GO:0009056,GO:0009987,GO:0005777,GO:0005488,GO:0008152,GO:000382            | response to stress,catabolic process,cellular process,metabolic process                      | peroxisome                     | binding,catalytic activity                                       |
| ug3360     | 294                  |                                                                                        |                                                                                              |                                |                                                                  |
| ug3361     | 472                  | GO:0003824,GO:0005488,GO:0005783,GO:00006810,GO:0005215,GO:0016020                     |                                                                                              | endoplasmic reticulum,membrane | catalytic activity,binding                                       |
| ug3362     | 453                  | GO:0006810,GO:0005215,GO:0016020                                                       | transport                                                                                    | membrane                       | transporter activity                                             |
| ug3363     | 476                  |                                                                                        |                                                                                              |                                |                                                                  |
| ug3364     | 507                  |                                                                                        |                                                                                              |                                |                                                                  |
| ug3365     | 164                  |                                                                                        |                                                                                              |                                |                                                                  |
| ug3366     | 479                  |                                                                                        |                                                                                              |                                |                                                                  |
| ug3367     | 583                  | GO:0005975,GO:0016000,GO:0005975,GO:0009987,GO:0005777,GO:0005488,GO:0008152,GO:000382 | carbohydrate metabolic process                                                               |                                | hydrolase activity                                               |
| ug3368     | 455                  | GO:0005975,GO:0016787,GO:0005576,GO:0005618,GO:0003824,GO:0005                         | carbohydrate metabolic process,cellular process                                              | extracellular region,cell wall | hydrolase activity,transferase activity                          |
| ug3369     | 659                  | GO:0003824,GO:0005                                                                     |                                                                                              |                                | catalytic activity,binding                                       |
| ug3370     | 642                  |                                                                                        |                                                                                              |                                |                                                                  |













| Unigene ID | sequence length (bp) | GO-ID                                                                                                                                | Biological process                                                                                                                                                            | Cellular component                                           | Molecular function                                                                         |
|------------|----------------------|--------------------------------------------------------------------------------------------------------------------------------------|-------------------------------------------------------------------------------------------------------------------------------------------------------------------------------|--------------------------------------------------------------|--------------------------------------------------------------------------------------------|
| ug3610     | 153                  |                                                                                                                                      |                                                                                                                                                                               |                                                              |                                                                                            |
| ug3611     | 693                  |                                                                                                                                      |                                                                                                                                                                               |                                                              |                                                                                            |
| ug3612     | 539                  |                                                                                                                                      |                                                                                                                                                                               |                                                              |                                                                                            |
|            |                      | GO:0005618,GO:0006950,GO:0006259,GO:0005739,GO:0016787,GO:0003677,GO:001604                                                          | response to stress,DNA metabolic process,cellular component organization,cellular                                                                                             | cell wall,mitochondrion,membrane,plastid,thylakoid           | hydrolase activity,DNA binding,nucleotide binding,protein binding,nuclease activity        |
| ug3613     | 774                  | 3,GO:0009987,GO:0019538,GO:0000166,GO:0016020,GO:0009536,GO:0005515,GO:0009579,GO:0009058,GO:0                                       | process,protein metabolic process,biosynthetic process,transport                                                                                                              |                                                              |                                                                                            |
| ug3614     | 410                  | GO:0006091,GO:0015                                                                                                                   | generation of precursor metabolites and                                                                                                                                       | membrane,plastid,thylakoid                                   | catalytic activity,molecular_function                                                      |
| ug3615     | 413                  | 979,GO:0003824,GO:0003674,GO:0006810,GO:0016020,GO:000953                                                                            | energy,photosynthesis,transport                                                                                                                                               |                                                              |                                                                                            |
| ug3616     | 747                  | GO:0016043,GO:0007049,GO:0005515,GO:0                                                                                                | cellular component organization,cell cycle                                                                                                                                    | nucleus                                                      | protein binding                                                                            |
| ug3617     | 192                  |                                                                                                                                      |                                                                                                                                                                               |                                                              |                                                                                            |
| ug3618     | 527                  | GO:0006810                                                                                                                           | transport                                                                                                                                                                     |                                                              |                                                                                            |
| ug3619     | 741                  | GO:0005622                                                                                                                           |                                                                                                                                                                               | intracellular                                                |                                                                                            |
| ug3620     | 663                  | GO:0005623,GO:0005737,GO:0016787,GO:0                                                                                                |                                                                                                                                                                               | cell,cytoplasm                                               | hydrolase activity,binding                                                                 |
| ug3621     | 812                  | GO:0003676,GO:0000166,GO:0009536                                                                                                     |                                                                                                                                                                               | plastid                                                      | nucleic acid binding,nucleotide binding                                                    |
| ug3622     | 315                  |                                                                                                                                      |                                                                                                                                                                               |                                                              |                                                                                            |
| ug3623     | 203                  |                                                                                                                                      |                                                                                                                                                                               |                                                              |                                                                                            |
| ug3624     | 197                  |                                                                                                                                      |                                                                                                                                                                               |                                                              |                                                                                            |
| ug3625     | 740                  | GO:0009058,GO:000987,GO:0019748,GO:0006629,GO:0005515,GO:0016043                                                                     | biosynthetic process,cellular process,secondary metabolic process,lipid metabolic process,cellular component                                                                  |                                                              | protein binding                                                                            |
| ug3626     | 793                  |                                                                                                                                      |                                                                                                                                                                               |                                                              |                                                                                            |
| ug3627     | 498                  | GO:0008150,GO:0005773,GO:0005576,GO:0005634,GO:0009536,GO:0005886,GO:000551                                                          | biological_process                                                                                                                                                            | vacuole,extracellular region,nucleus,plastid,plasma membrane | protein binding                                                                            |
| ug3628     | 617                  | GO:0019538,GO:000987,GO:0009628,GO:0003676,GO:0004871,GO:0000166,GO:000548                                                           | protein metabolic process,cellular process,response to abiotic stimulus                                                                                                       |                                                              | nucleic acid binding,signal transducer activity,nucleotide binding,binding,protein binding |
| ug3629     | 311                  |                                                                                                                                      |                                                                                                                                                                               |                                                              |                                                                                            |
| ug3630     | 648                  | GO:0009536                                                                                                                           |                                                                                                                                                                               | plastid                                                      |                                                                                            |
| ug3631     | 435                  | GO:0016787,GO:0005737,GO:0019538,GO:0009987,GO:0016020,GO                                                                            | protein metabolic process,cellular process                                                                                                                                    | cytoplasm,membrane,endoplasmic reticulum                     | hydrolase activity                                                                         |
| ug3632     | 468                  |                                                                                                                                      |                                                                                                                                                                               |                                                              |                                                                                            |
| ug3633     | 679                  |                                                                                                                                      |                                                                                                                                                                               |                                                              |                                                                                            |
| ug3634     | 410                  |                                                                                                                                      |                                                                                                                                                                               |                                                              |                                                                                            |
| ug3635     | 697                  | GO:0016020,GO:0003824,GO:0009536,GO:000003,GO:0009791,GO:0016740,GO:0006350,GO:0009536                                               | reproduction,post-embryonic development,embryonic development                                                                                                                 | membrane,plastid                                             | catalytic activity                                                                         |
| ug3636     | 768                  | GO:0016740,GO:0006350,GO:0009536                                                                                                     | transcription                                                                                                                                                                 | plastid                                                      | transferase activity                                                                       |
| ug3637     | 428                  | GO:0008152,GO:0016787,GO:0009536                                                                                                     | metabolic process                                                                                                                                                             | plastid                                                      | hydrolase activity                                                                         |
| ug3638     | 731                  | GO:0009058,GO:000987,GO:0003824,GO:0006950,GO:0009628,GO:0005783,GO:0009536,GO:0005886                                               | biosynthetic process,cellular process,response to stress,response to abiotic stimulus                                                                                         |                                                              | catalytic activity                                                                         |
| ug3639     | 823                  |                                                                                                                                      |                                                                                                                                                                               | endoplasmic reticulum,plastid,plasma membrane                |                                                                                            |
| ug3640     | 811                  |                                                                                                                                      |                                                                                                                                                                               |                                                              |                                                                                            |
| ug3641     | 313                  |                                                                                                                                      |                                                                                                                                                                               |                                                              |                                                                                            |
| ug3642     | 625                  | GO:0006810,GO:0009628,GO:0009606,GO:0016020,GO:0016787,GO:0005215,GO:0009791,GO:0009719,GO:0008150,GO:0000166,GO:0009605,GO:0005515, | transport,response to abiotic stimulus,tropism,post-embryonic development,response to endogenous stimulus,biological_process,response to external stimulus,flower development | membrane,plasma membrane                                     | hydrolase activity,transporter activity,nucleotide binding,protein binding                 |
| ug3643     | 505                  |                                                                                                                                      |                                                                                                                                                                               |                                                              |                                                                                            |
| ug3644     | 902                  | GO:0008150,GO:0009                                                                                                                   | biological_process                                                                                                                                                            | plastid                                                      |                                                                                            |
| ug3645     | 440                  |                                                                                                                                      |                                                                                                                                                                               |                                                              |                                                                                            |
| ug3646     | 247                  |                                                                                                                                      |                                                                                                                                                                               |                                                              |                                                                                            |
| ug3647     | 286                  | GO:0016020                                                                                                                           |                                                                                                                                                                               | membrane                                                     |                                                                                            |
| ug3648     | 411                  |                                                                                                                                      |                                                                                                                                                                               |                                                              |                                                                                            |
| ug3649     | 554                  |                                                                                                                                      |                                                                                                                                                                               |                                                              |                                                                                            |
| ug3650     | 385                  |                                                                                                                                      |                                                                                                                                                                               |                                                              |                                                                                            |
| ug3651     | 173                  |                                                                                                                                      |                                                                                                                                                                               |                                                              |                                                                                            |

| Unigene ID | sequence length (bp) | GO-ID                                                                                                                                                                     | Biological process                                                                                                                                                                                                                                | Cellular component                                   | Molecular function                                                                  |
|------------|----------------------|---------------------------------------------------------------------------------------------------------------------------------------------------------------------------|---------------------------------------------------------------------------------------------------------------------------------------------------------------------------------------------------------------------------------------------------|------------------------------------------------------|-------------------------------------------------------------------------------------|
| ug3652     | 295                  |                                                                                                                                                                           |                                                                                                                                                                                                                                                   |                                                      |                                                                                     |
| ug3653     | 350                  |                                                                                                                                                                           |                                                                                                                                                                                                                                                   |                                                      |                                                                                     |
| ug3654     | 290                  |                                                                                                                                                                           |                                                                                                                                                                                                                                                   |                                                      |                                                                                     |
| ug3655     | 830                  | GO:0030246,GO:0005618,GO:0005975,GO:0005773,GO:0005488,GO:0005886,GO:001678                                                                                               | carbohydrate metabolic process                                                                                                                                                                                                                    | cell wall,vacuole,plasma membrane,cellular_component | carbohydrate binding,kinase,hydrolase activity                                      |
| ug3656     | 745                  |                                                                                                                                                                           |                                                                                                                                                                                                                                                   |                                                      |                                                                                     |
| ug3657     | 176                  |                                                                                                                                                                           |                                                                                                                                                                                                                                                   |                                                      |                                                                                     |
| ug3658     | 483                  |                                                                                                                                                                           |                                                                                                                                                                                                                                                   |                                                      |                                                                                     |
| ug3659     | 184                  |                                                                                                                                                                           |                                                                                                                                                                                                                                                   |                                                      |                                                                                     |
| ug3660     | 632                  |                                                                                                                                                                           |                                                                                                                                                                                                                                                   |                                                      |                                                                                     |
| ug3661     | 777                  | GO:0003677,GO:0006                                                                                                                                                        | transcription                                                                                                                                                                                                                                     |                                                      | DNA binding                                                                         |
| ug3662     | 871                  | GO:0005488,GO:0008152,GO:0003824,GO:0                                                                                                                                     | metabolic process                                                                                                                                                                                                                                 |                                                      | binding,catalytic activity,molecular_function                                       |
| ug3663     | 226                  |                                                                                                                                                                           |                                                                                                                                                                                                                                                   |                                                      |                                                                                     |
| ug3664     | 473                  |                                                                                                                                                                           |                                                                                                                                                                                                                                                   |                                                      |                                                                                     |
| ug3665     | 155                  |                                                                                                                                                                           |                                                                                                                                                                                                                                                   |                                                      |                                                                                     |
| ug3666     | 354                  |                                                                                                                                                                           |                                                                                                                                                                                                                                                   |                                                      |                                                                                     |
| ug3667     | 275                  |                                                                                                                                                                           |                                                                                                                                                                                                                                                   |                                                      |                                                                                     |
| ug3668     | 418                  |                                                                                                                                                                           |                                                                                                                                                                                                                                                   |                                                      |                                                                                     |
| ug3669     | 306                  | GO:0016301,GO:0006139,GO:0007275,GO:000166,GO:0009536,GO:0009058,GO:0006519,GO:0005634                                                                                    | nucleobase, nucleoside, nucleotide and nucleic acid metabolic process,multicellular organismal development,biosynthetic process,cellular amino acid and derivative metabolic process                                                              | plastid,nucleus                                      | kinase activity,nucleotide binding                                                  |
| ug3670     | 324                  | GO:0008152,GO:0003824,GO:0006950                                                                                                                                          | metabolic process,response to stress                                                                                                                                                                                                              |                                                      | catalytic activity                                                                  |
| ug3671     | 253                  |                                                                                                                                                                           |                                                                                                                                                                                                                                                   |                                                      |                                                                                     |
| ug3672     | 144                  |                                                                                                                                                                           |                                                                                                                                                                                                                                                   |                                                      |                                                                                     |
| ug3673     | 124                  |                                                                                                                                                                           |                                                                                                                                                                                                                                                   |                                                      |                                                                                     |
| ug3674     | 626                  |                                                                                                                                                                           |                                                                                                                                                                                                                                                   |                                                      |                                                                                     |
| ug3675     | 215                  |                                                                                                                                                                           |                                                                                                                                                                                                                                                   |                                                      |                                                                                     |
| ug3676     | 485                  |                                                                                                                                                                           |                                                                                                                                                                                                                                                   |                                                      |                                                                                     |
| ug3677     | 164                  |                                                                                                                                                                           |                                                                                                                                                                                                                                                   |                                                      |                                                                                     |
| ug3678     | 453                  |                                                                                                                                                                           |                                                                                                                                                                                                                                                   |                                                      |                                                                                     |
| ug3679     | 794                  | GO:0006464,GO:0005886,GO:0005515,GO:0016301,GO:0000166,GO                                                                                                                 | protein modification process,signal transduction                                                                                                                                                                                                  | plasma membrane                                      | protein binding,kinase activity,nucleotide binding                                  |
| ug3680     | 473                  |                                                                                                                                                                           |                                                                                                                                                                                                                                                   |                                                      |                                                                                     |
| ug3681     | 348                  |                                                                                                                                                                           |                                                                                                                                                                                                                                                   |                                                      |                                                                                     |
| ug3682     | 459                  |                                                                                                                                                                           |                                                                                                                                                                                                                                                   |                                                      |                                                                                     |
| ug3683     | 534                  | GO:0007049,GO:0005634,GO:0030234,GO:0005515,GO:0009987                                                                                                                    | cell cycle,cellular process                                                                                                                                                                                                                       | nucleus                                              | enzyme regulator activity,protein binding                                           |
| ug3684     | 571                  |                                                                                                                                                                           |                                                                                                                                                                                                                                                   |                                                      |                                                                                     |
| ug3685     | 451                  | GO:0003723,GO:0006139,GO:0009058,GO:0005739,GO:0000003,GO:0009791,GO:0009790,GO:0003824,GO:0008152,GO:0006259,GO:0016043,GO:0009987,GO:0000166,GO:0005515,GO:0005737,GO:0 | nucleobase, nucleoside, nucleotide and nucleic acid metabolic process,biosynthetic process,reproduction,post-embryonic development,embryonic development,metabolic process,DNA metabolic process,cellular component organization,cellular process | mitochondrion,cytoplasm,plastid                      | RNA binding,catalytic activity,nucleotide binding,protein binding,nuclease activity |
| ug3686     | 104                  |                                                                                                                                                                           |                                                                                                                                                                                                                                                   |                                                      |                                                                                     |
| ug3687     | 673                  | GO:0005794,GO:0009653,GO:0016043,GO:0016049,GO:0009987,GO:0016787                                                                                                         | anatomical structure morphogenesis,cellular component organization,cell growth,cellular process                                                                                                                                                   | Golgi apparatus                                      | hydrolase activity                                                                  |
| ug3688     | 481                  |                                                                                                                                                                           |                                                                                                                                                                                                                                                   |                                                      |                                                                                     |
| ug3689     | 680                  |                                                                                                                                                                           |                                                                                                                                                                                                                                                   |                                                      |                                                                                     |
| ug3690     | 284                  | GO:0016787,GO:0005975,GO:0005737,GO:0                                                                                                                                     | carbohydrate metabolic process                                                                                                                                                                                                                    | cytoplasm                                            | hydrolase activity,kinase activity                                                  |
| ug3691     | 573                  | GO:0003676,GO:0000166                                                                                                                                                     |                                                                                                                                                                                                                                                   |                                                      | nucleic acid binding,nucleotide binding                                             |
| ug3692     | 627                  |                                                                                                                                                                           |                                                                                                                                                                                                                                                   |                                                      |                                                                                     |
| ug3693     | 489                  |                                                                                                                                                                           |                                                                                                                                                                                                                                                   |                                                      |                                                                                     |
| ug3694     | 294                  | GO:0003676                                                                                                                                                                |                                                                                                                                                                                                                                                   |                                                      | nucleic acid binding                                                                |
| ug3695     | 444                  |                                                                                                                                                                           |                                                                                                                                                                                                                                                   |                                                      |                                                                                     |
| ug3696     | 352                  |                                                                                                                                                                           |                                                                                                                                                                                                                                                   |                                                      |                                                                                     |
| ug3697     | 327                  | GO:0006464,GO:0005886,GO:0005515,GO:0000166,GO:0016301                                                                                                                    | protein modification process                                                                                                                                                                                                                      | plasma membrane                                      | protein binding,nucleotide binding,kinase activity                                  |
| ug3698     | 411                  | GO:0009058,GO:0009                                                                                                                                                        | biosynthetic process,cellular                                                                                                                                                                                                                     |                                                      |                                                                                     |
| ug3699     | 879                  | GO:0005737,GO:0005                                                                                                                                                        |                                                                                                                                                                                                                                                   | cytoplasm,intracellular                              |                                                                                     |
| ug3700     | 383                  |                                                                                                                                                                           |                                                                                                                                                                                                                                                   |                                                      |                                                                                     |
| ug3701     | 774                  |                                                                                                                                                                           |                                                                                                                                                                                                                                                   |                                                      |                                                                                     |
| ug3702     | 807                  | GO:0016740,GO:0008                                                                                                                                                        | metabolic process                                                                                                                                                                                                                                 |                                                      | transferase activity                                                                |

| Unigene ID | sequence length (bp) | GO-ID                                                                                                                                                       | Biological process                                                                                                                                                                             | Cellular component                     | Molecular function                                                               |
|------------|----------------------|-------------------------------------------------------------------------------------------------------------------------------------------------------------|------------------------------------------------------------------------------------------------------------------------------------------------------------------------------------------------|----------------------------------------|----------------------------------------------------------------------------------|
| ug3703     | 136                  |                                                                                                                                                             |                                                                                                                                                                                                |                                        |                                                                                  |
| ug3704     | 596                  |                                                                                                                                                             |                                                                                                                                                                                                |                                        |                                                                                  |
| ug3705     | 115                  |                                                                                                                                                             |                                                                                                                                                                                                |                                        |                                                                                  |
| ug3706     | 272                  |                                                                                                                                                             |                                                                                                                                                                                                |                                        |                                                                                  |
| ug3707     | 401                  |                                                                                                                                                             |                                                                                                                                                                                                |                                        |                                                                                  |
| ug3708     | 791                  | GO:0007165,GO:0004                                                                                                                                          | signal transduction                                                                                                                                                                            |                                        | signal transducer activity                                                       |
| ug3709     | 341                  | GO:0005623                                                                                                                                                  |                                                                                                                                                                                                | cell                                   |                                                                                  |
| ug3710     | 175                  |                                                                                                                                                             |                                                                                                                                                                                                |                                        |                                                                                  |
| ug3711     | 543                  |                                                                                                                                                             |                                                                                                                                                                                                |                                        |                                                                                  |
| ug3712     | 460                  | GO:0009536                                                                                                                                                  |                                                                                                                                                                                                | plastid                                |                                                                                  |
|            |                      |                                                                                                                                                             | biosynthetic process,carbohydrate                                                                                                                                                              |                                        |                                                                                  |
|            |                      |                                                                                                                                                             | metabolic process,cellular                                                                                                                                                                     |                                        |                                                                                  |
| ug3713     | 685                  | GO:0005737,GO:0009<br>058,GO:0005975,GO:0<br>009987,GO:0006629,G<br>O:0003824,GO:000613<br>9,GO:0009056,GO:001<br>9748,GO:0006091                           | process,lipid metabolic<br>process,nucleobase, nucleoside,<br>nucleotide and nucleic acid<br>metabolic process,catabolic<br>process,secondary metabolic<br>process,generation of precursor     | cytoplasm                              | catalytic activity                                                               |
| ug3714     | 920                  | GO:0005618,GO:0016<br>787,GO:0009536,GO:0<br>019538,GO:0009056,G                                                                                            | protein metabolic process,catabolic<br>process                                                                                                                                                 | cell wall,plastid,extracellular region | hydrolase activity                                                               |
| ug3715     | 211                  | GO:0005576                                                                                                                                                  |                                                                                                                                                                                                | extracellular region                   |                                                                                  |
| ug3716     | 879                  | GO:0009058,GO:0009<br>987,GO:0006629,GO:0                                                                                                                   | biosynthetic process,cellular<br>process,lipid metabolic process                                                                                                                               |                                        | transporter activity                                                             |
| ug3717     | 412                  |                                                                                                                                                             |                                                                                                                                                                                                |                                        |                                                                                  |
| ug3718     | 356                  |                                                                                                                                                             |                                                                                                                                                                                                |                                        |                                                                                  |
| ug3719     | 939                  |                                                                                                                                                             |                                                                                                                                                                                                |                                        |                                                                                  |
| ug3720     | 596                  | GO:0005634,GO:0007<br>049,GO:0009987                                                                                                                        | cell cycle,cellular process                                                                                                                                                                    | nucleus                                |                                                                                  |
| ug3721     | 135                  |                                                                                                                                                             |                                                                                                                                                                                                |                                        |                                                                                  |
| ug3722     | 727                  | GO:0005794                                                                                                                                                  |                                                                                                                                                                                                | Golgi apparatus                        |                                                                                  |
| ug3723     | 242                  |                                                                                                                                                             |                                                                                                                                                                                                |                                        |                                                                                  |
| ug3724     | 887                  | GO:0005856,GO:0005<br>737,GO:0000166,GO:0                                                                                                                   |                                                                                                                                                                                                | cytoskeleton,cytoplasm                 | nucleotide binding,protein<br>binding                                            |
| ug3725     | 343                  |                                                                                                                                                             |                                                                                                                                                                                                |                                        |                                                                                  |
| ug3726     | 766                  | GO:0006950,GO:0009<br>628,GO:0016740,GO:0<br>016787,GO:0006139,G<br>O:0009058,GO:000953                                                                     | response to stress,response to<br>abiotic stimulus,nucleobase,<br>nucleoside, nucleotide and nucleic<br>acid metabolic process,biosynthetic                                                    | plastid                                | transferase activity,hydrolase<br>activity                                       |
| ug3727     | 147                  |                                                                                                                                                             |                                                                                                                                                                                                |                                        |                                                                                  |
| ug3728     | 861                  |                                                                                                                                                             |                                                                                                                                                                                                |                                        |                                                                                  |
| ug3729     | 741                  |                                                                                                                                                             |                                                                                                                                                                                                |                                        |                                                                                  |
| ug3730     | 898                  | GO:0005622,GO:0006<br>810,GO:0005215                                                                                                                        | transport                                                                                                                                                                                      | intracellular                          | transporter activity                                                             |
| ug3731     | 794                  | GO:0016787                                                                                                                                                  |                                                                                                                                                                                                |                                        | hydrolase activity                                                               |
| ug3732     | 429                  |                                                                                                                                                             |                                                                                                                                                                                                |                                        |                                                                                  |
| ug3733     | 260                  |                                                                                                                                                             |                                                                                                                                                                                                |                                        |                                                                                  |
| ug3734     | 893                  |                                                                                                                                                             |                                                                                                                                                                                                |                                        |                                                                                  |
| ug3735     | 297                  |                                                                                                                                                             |                                                                                                                                                                                                |                                        |                                                                                  |
| ug3736     | 525                  | GO:0006259,GO:0009<br>058,GO:0005515,GO:0<br>016043,GO:0009987,G<br>O:0009536,GO:000563                                                                     | DNA metabolic<br>process,biosynthetic<br>process,cellular component<br>organization,cellular process                                                                                           | plastid,nucleus                        | protein binding,kinase<br>activity                                               |
| ug3737     | 456                  |                                                                                                                                                             |                                                                                                                                                                                                |                                        |                                                                                  |
| ug3738     | 108                  |                                                                                                                                                             |                                                                                                                                                                                                |                                        |                                                                                  |
| ug3739     | 340                  |                                                                                                                                                             |                                                                                                                                                                                                |                                        |                                                                                  |
| ug3740     | 236                  |                                                                                                                                                             |                                                                                                                                                                                                |                                        |                                                                                  |
| ug3741     | 547                  |                                                                                                                                                             |                                                                                                                                                                                                |                                        |                                                                                  |
| ug3742     | 163                  |                                                                                                                                                             |                                                                                                                                                                                                |                                        |                                                                                  |
| ug3743     | 883                  | GO:0005737,GO:0016<br>787,GO:0009536                                                                                                                        |                                                                                                                                                                                                | cytoplasm,plastid                      | hydrolase activity                                                               |
| ug3744     | 391                  |                                                                                                                                                             |                                                                                                                                                                                                |                                        |                                                                                  |
| ug3745     | 753                  | GO:0005737,GO:0005<br>634,GO:0005488,GO:0                                                                                                                   | protein modification process                                                                                                                                                                   | cytoplasm,nucleus                      | binding                                                                          |
| ug3746     | 585                  |                                                                                                                                                             |                                                                                                                                                                                                |                                        |                                                                                  |
| ug3747     | 951                  | GO:0006810,GO:0016<br>043,GO:0009987,GO:0<br>005737,GO:0016020,G<br>O:0005777,GO:000551<br>5,GO:0009056,GO:000                                              | transport,cellular component<br>organization,cellular<br>process,catabolic process,lipid<br>metabolic process                                                                                  | cytoplasm,membrane,peroxisome          | protein binding                                                                  |
| ug3748     | 576                  | GO:0003723,GO:0006<br>139,GO:0005634,GO:0<br>GO:0003676,GO:0005<br>515,GO:0000003,GO:0<br>009628,GO:0009791,G<br>O:0009605,GO:000716<br>5,GO:0003824,GO:000 | nucleobase, nucleoside, nucleotide<br>and nucleic acid metabolic process<br>reproduction,response to abiotic<br>stimulus,post-embryonic<br>development,response to external<br>stimulus,signal | nucleus                                | RNA binding,nucleotide<br>binding                                                |
| ug3749     | 575                  | GO:0003824,GO:000<br>7275,GO:0005634,GO:                                                                                                                    | transduction,multicellular<br>organismal development                                                                                                                                           | nucleus                                | nucleic acid binding,protein<br>binding,catalytic<br>activity,nucleotide binding |
| ug3750     | 884                  |                                                                                                                                                             |                                                                                                                                                                                                |                                        |                                                                                  |

| Unigene ID | sequence length (bp) | GO-ID                                                                                               | Biological process                                                                                   | Cellular component              | Molecular function                                                            |
|------------|----------------------|-----------------------------------------------------------------------------------------------------|------------------------------------------------------------------------------------------------------|---------------------------------|-------------------------------------------------------------------------------|
| ug3751     | 536                  | GO:0007049,GO:0016301,GO:0005515                                                                    | cell cycle                                                                                           |                                 | kinase activity,protein binding                                               |
| ug3752     | 236                  | GO:0016787,GO:0000166,GO:0009536                                                                    |                                                                                                      | plastid                         | hydrolase activity,nucleotide binding                                         |
| ug3753     | 372                  |                                                                                                     |                                                                                                      |                                 |                                                                               |
| ug3754     | 367                  | GO:0016020,GO:0005280                                                                               |                                                                                                      | membrane,endosome               |                                                                               |
| ug3755     | 280                  |                                                                                                     |                                                                                                      |                                 |                                                                               |
| ug3756     | 824                  | GO:0016787                                                                                          |                                                                                                      |                                 | hydrolase activity                                                            |
| ug3757     | 454                  | GO:0005739,GO:0009536,GO:0016020                                                                    |                                                                                                      | mitochondrion,plastid,membrane  |                                                                               |
| ug3758     | 783                  | GO:0005488                                                                                          |                                                                                                      |                                 | binding                                                                       |
| ug3759     | 892                  |                                                                                                     |                                                                                                      |                                 |                                                                               |
| ug3760     | 243                  |                                                                                                     |                                                                                                      |                                 |                                                                               |
| ug3761     | 715                  |                                                                                                     |                                                                                                      |                                 |                                                                               |
| ug3762     | 930                  | GO:0005623,GO:000810,GO:0009987,GO:0016020,GO:0005768                                               | transport,cellular process                                                                           | cell,membrane,endosome          |                                                                               |
| ug3763     | 301                  |                                                                                                     |                                                                                                      |                                 |                                                                               |
| ug3764     | 102                  |                                                                                                     |                                                                                                      |                                 |                                                                               |
| ug3765     | 800                  | GO:0003677                                                                                          |                                                                                                      |                                 | DNA binding                                                                   |
| ug3766     | 551                  | GO:0007275                                                                                          | multicellular organismal                                                                             |                                 |                                                                               |
| ug3767     | 280                  |                                                                                                     |                                                                                                      |                                 |                                                                               |
| ug3768     | 838                  |                                                                                                     |                                                                                                      |                                 |                                                                               |
| ug3769     | 869                  | GO:0019725                                                                                          | cellular homeostasis                                                                                 |                                 |                                                                               |
| ug3770     | 429                  |                                                                                                     |                                                                                                      |                                 |                                                                               |
| ug3771     | 269                  |                                                                                                     |                                                                                                      |                                 |                                                                               |
| ug3772     | 410                  |                                                                                                     |                                                                                                      |                                 |                                                                               |
| ug3773     | 803                  |                                                                                                     |                                                                                                      |                                 |                                                                               |
| ug3774     | 341                  |                                                                                                     |                                                                                                      |                                 |                                                                               |
| ug3775     | 761                  | GO:0005515,GO:0009628,GO:0004871                                                                    | response to abiotic stimulus                                                                         |                                 | protein binding,signal transducer activity                                    |
| ug3776     | 709                  |                                                                                                     |                                                                                                      |                                 |                                                                               |
| ug3777     | 724                  |                                                                                                     |                                                                                                      |                                 |                                                                               |
| ug3778     | 292                  |                                                                                                     |                                                                                                      |                                 |                                                                               |
| ug3779     | 837                  |                                                                                                     |                                                                                                      |                                 |                                                                               |
| ug3780     | 174                  |                                                                                                     |                                                                                                      |                                 |                                                                               |
| ug3781     | 482                  |                                                                                                     |                                                                                                      |                                 |                                                                               |
| ug3782     | 467                  |                                                                                                     |                                                                                                      |                                 |                                                                               |
| ug3783     | 572                  |                                                                                                     |                                                                                                      |                                 |                                                                               |
| ug3784     | 396                  |                                                                                                     |                                                                                                      |                                 |                                                                               |
| ug3785     | 118                  |                                                                                                     |                                                                                                      |                                 |                                                                               |
| ug3786     | 600                  |                                                                                                     |                                                                                                      |                                 |                                                                               |
| ug3787     | 634                  | GO:0005840                                                                                          |                                                                                                      | ribosome                        |                                                                               |
| ug3788     | 869                  | GO:0005488,GO:000515,GO:0003677                                                                     |                                                                                                      |                                 | binding,protein binding,DNA binding                                           |
| ug3789     | 765                  | GO:0005488                                                                                          |                                                                                                      |                                 | binding                                                                       |
| ug3790     | 538                  | GO:0005488                                                                                          |                                                                                                      |                                 | binding                                                                       |
| ug3791     | 674                  |                                                                                                     |                                                                                                      |                                 |                                                                               |
| ug3792     | 699                  |                                                                                                     |                                                                                                      |                                 |                                                                               |
| ug3793     | 164                  |                                                                                                     |                                                                                                      |                                 |                                                                               |
| ug3794     | 419                  | GO:0005886,GO:0005275,GO:0009653,GO:0007008,GO:0006350,GO:0008289,GO:0003677,GO:00030154,GO:0003700 | anatomical structure morphogenesis,multicellular organismal development,transcription,cell           | plasma membrane,vacuole nucleus | lipid binding,DNA binding,transcription factor activity                       |
| ug3796     | 716                  |                                                                                                     |                                                                                                      |                                 |                                                                               |
| ug3797     | 374                  |                                                                                                     |                                                                                                      |                                 |                                                                               |
| ug3798     | 194                  |                                                                                                     |                                                                                                      |                                 |                                                                               |
| ug3799     | 621                  | GO:0004518,GO:001740,GO:0003677,GO:0016787,GO:0009987,GO:0005488,GO:0006250                         | cellular process,DNA metabolic process                                                               |                                 | nuclease activity,transferase activity,DNA binding,hydrolase activity,binding |
| ug3800     | 138                  |                                                                                                     |                                                                                                      |                                 |                                                                               |
| ug3801     | 695                  | GO:0005215,GO:000886,GO:0006810                                                                     | transport                                                                                            | plasma membrane                 | transporter activity                                                          |
| ug3802     | 317                  | GO:0009058,GO:0006139,GO:0000166,GO:0006810,GO:0016020,GO:0016787,GO:0005210                        | biosynthetic process,nucleobase, nucleoside, nucleotide and nucleic acid metabolic process,transport | membrane                        | nucleotide binding,hydrolase activity,transporter activity                    |
| ug3803     | 506                  | GO:0005488                                                                                          |                                                                                                      |                                 | binding                                                                       |
| ug3804     | 575                  | GO:0005840,GO:0009099,GO:0005198,GO:0009987,GO:0006412                                              | cellular process,translation                                                                         | ribosome,plastid                | structural molecule activity                                                  |
| ug3805     | 272                  |                                                                                                     |                                                                                                      |                                 |                                                                               |
| ug3806     | 346                  |                                                                                                     |                                                                                                      |                                 |                                                                               |
| ug3807     | 748                  | GO:0016020,GO:0009536,GO:0009579                                                                    |                                                                                                      | membrane,plastid,thylakoid      |                                                                               |
| ug3808     | 833                  | GO:0016020,GO:000886,GO:0030246                                                                     |                                                                                                      | membrane,plasma membrane        | carbohydrate binding                                                          |
| ug3809     | 573                  |                                                                                                     |                                                                                                      |                                 |                                                                               |

| Unigene ID | sequence length (bp) | GO-ID                                                    | Biological process                                                               | Cellular component                                        | Molecular function                                 |
|------------|----------------------|----------------------------------------------------------|----------------------------------------------------------------------------------|-----------------------------------------------------------|----------------------------------------------------|
| ug3810     | 284                  | GO:0003677,GO:0006                                       | DNA metabolic process                                                            |                                                           | DNA binding                                        |
| ug3811     | 720                  | GO:0019538,GO:0009056,GO:0009987,GO:0                    | protein metabolic process,catabolic process,cellular process                     |                                                           | protein binding                                    |
| ug3812     | 158                  |                                                          |                                                                                  |                                                           |                                                    |
| ug3813     | 175                  |                                                          |                                                                                  |                                                           |                                                    |
| ug3814     | 175                  |                                                          |                                                                                  |                                                           |                                                    |
| ug3815     | 608                  | GO:0003677,GO:0005151,GO:0007165,GO:0009719,GO:0005634,G | signal transduction,response to endogenous stimulus,transcription                | nucleus                                                   | DNA binding,protein binding                        |
| ug3816     | 611                  |                                                          |                                                                                  |                                                           |                                                    |
| ug3817     | 726                  |                                                          |                                                                                  |                                                           |                                                    |
| ug3818     | 777                  | GO:0006139,GO:0003824                                    | nucleobase, nucleoside, nucleotide and nucleic acid metabolic process            |                                                           | catalytic activity                                 |
| ug3819     | 538                  | GO:0005488                                               |                                                                                  |                                                           | binding                                            |
| ug3820     | 328                  | GO:0016787,GO:0005737,GO:0007165,GO:0                    | signal transduction                                                              | cytoplasm,nucleus                                         | hydrolase activity                                 |
| ug3821     | 333                  | GO:0019725                                               | cellular homeostasis                                                             |                                                           |                                                    |
| ug3822     | 538                  |                                                          |                                                                                  |                                                           |                                                    |
| ug3823     | 905                  | GO:0008152,GO:0009987,GO:0005488,GO:0                    | metabolic process,cellular process                                               |                                                           | binding,catalytic activity                         |
| ug3824     | 301                  |                                                          |                                                                                  |                                                           |                                                    |
| ug3825     | 281                  |                                                          |                                                                                  |                                                           |                                                    |
| ug3826     | 669                  |                                                          |                                                                                  |                                                           |                                                    |
| ug3827     | 844                  | GO:0005488,GO:0005                                       |                                                                                  | Golgi apparatus                                           | binding                                            |
| ug3828     | 240                  |                                                          |                                                                                  |                                                           |                                                    |
| ug3829     | 115                  |                                                          |                                                                                  |                                                           |                                                    |
| ug3830     | 352                  |                                                          |                                                                                  |                                                           |                                                    |
| ug3831     | 532                  | GO:0005618,GO:0009987,GO:0008152,GO:0003824,GO:0005739   | response to endogenous stimulus metabolic process                                | cell wall mitochondrion                                   | catalytic activity                                 |
| ug3832     | 657                  | GO:0005730,GO:0005                                       |                                                                                  |                                                           |                                                    |
| ug3833     | 678                  | GO:0005622,GO:0005634,GO:0006139,G                       | nucleobase, nucleoside, nucleotide and nucleic acid metabolic process            | nucleolus,nucleoplasm,intracellular,nucleus,mitochondrion |                                                    |
| ug3834     | 268                  | GO:0000166,GO:0006139,GO:0016301                         | nucleobase, nucleoside, nucleotide and nucleic acid metabolic process            |                                                           | nucleotide binding,kinase activity                 |
| ug3835     | 181                  |                                                          |                                                                                  |                                                           |                                                    |
| ug3836     | 380                  |                                                          |                                                                                  |                                                           |                                                    |
| ug3837     | 711                  |                                                          |                                                                                  |                                                           |                                                    |
| ug3838     | 373                  | GO:0016787,GO:0016043,GO:0009987                         | cellular component organization,cellular process                                 |                                                           | hydrolase activity                                 |
| ug3839     | 347                  |                                                          |                                                                                  |                                                           |                                                    |
| ug3840     | 626                  |                                                          |                                                                                  |                                                           |                                                    |
| ug3841     | 174                  |                                                          |                                                                                  |                                                           |                                                    |
| ug3842     | 371                  | GO:0005575,GO:0019538,GO:0009056,GO:000166,GO:0016787,G  | protein metabolic process,catabolic process                                      | cellular_component,nucleus,cytosol                        | nucleotide binding,hydrolase activity              |
| ug3843     | 239                  | O:0005634,GO:000582                                      |                                                                                  |                                                           |                                                    |
| ug3844     | 779                  |                                                          |                                                                                  |                                                           |                                                    |
| ug3845     | 167                  |                                                          |                                                                                  |                                                           |                                                    |
| ug3846     | 224                  |                                                          |                                                                                  |                                                           |                                                    |
| ug3847     | 141                  |                                                          |                                                                                  |                                                           |                                                    |
| ug3848     | 157                  |                                                          |                                                                                  |                                                           |                                                    |
| ug3849     | 429                  |                                                          |                                                                                  |                                                           |                                                    |
| ug3850     | 257                  |                                                          |                                                                                  |                                                           |                                                    |
| ug3851     | 801                  |                                                          |                                                                                  |                                                           |                                                    |
| ug3852     | 541                  |                                                          |                                                                                  |                                                           |                                                    |
| ug3853     | 435                  |                                                          |                                                                                  |                                                           |                                                    |
| ug3854     | 671                  | GO:0009536                                               |                                                                                  | plastid                                                   |                                                    |
| ug3855     | 638                  |                                                          |                                                                                  |                                                           |                                                    |
| ug3856     | 176                  |                                                          |                                                                                  |                                                           |                                                    |
| ug3857     | 310                  |                                                          |                                                                                  |                                                           |                                                    |
| ug3858     | 268                  |                                                          |                                                                                  |                                                           |                                                    |
| ug3859     | 441                  |                                                          |                                                                                  |                                                           |                                                    |
| ug3860     | 192                  |                                                          |                                                                                  |                                                           |                                                    |
| ug3861     | 652                  | GO:0016787,GO:0009987,GO:0003824,GO:0009536              | biosynthetic process,cellular process                                            | plastid                                                   | hydrolase activity,catalytic activity              |
| ug3862     | 504                  |                                                          |                                                                                  |                                                           |                                                    |
| ug3863     | 574                  | GO:0005488,GO:0008152,GO:0003824,GO:0                    | metabolic process                                                                |                                                           | binding,catalytic activity,molecular_function      |
| ug3864     | 270                  |                                                          |                                                                                  |                                                           |                                                    |
| ug3865     | 792                  | GO:0006464,GO:0005773,GO:0005886,GO:0005515,GO:0016301,G | protein modification process,response to endogenous stimulus,signal transduction | vacuole,plasma membrane                                   | protein binding,kinase activity,nucleotide binding |
| ug3866     | 704                  | O:0000166,GO:000971                                      |                                                                                  |                                                           |                                                    |
| ug3867     | 801                  | GO:0005488,GO:0008152,GO:0003824,GO:0003674,GO:0006950   | metabolic process,response to stress                                             |                                                           | binding,catalytic activity,molecular_function      |

| Unigene ID | sequence length (bp) | GO-ID                                                                                          | Biological process                                                                                                | Cellular component                          | Molecular function                                            |
|------------|----------------------|------------------------------------------------------------------------------------------------|-------------------------------------------------------------------------------------------------------------------|---------------------------------------------|---------------------------------------------------------------|
| ug3868     | 570                  | GO:0009058,GO:0009                                                                             | biosynthetic process,cellular                                                                                     |                                             |                                                               |
| ug3869     | 782                  | 987,GO:0006950,GO:0009607,GO:0016020,G                                                         | process,response to stress,response to biotic stimulus                                                            | membrane,plastid                            |                                                               |
| ug3870     | 255                  |                                                                                                |                                                                                                                   |                                             |                                                               |
| ug3871     | 340                  |                                                                                                |                                                                                                                   |                                             |                                                               |
| ug3872     | 531                  | GO:0005488                                                                                     |                                                                                                                   |                                             | binding                                                       |
|            |                      | GO:0005488,GO:0016787,GO:0016301,GO:0007275,GO:0040007,G                                       | multicellular organismal development,growth,carbohydrate metabolic process,cellular process,catabolic             |                                             |                                                               |
| ug3873     | 487                  | O:0005975,GO:0009987,GO:0009056,GO:0009653,GO:0007165,GO:0000166,GO:0030154,GO:0009908,GO:0006 | process,anatomical structure morphogenesis,signal transduction,cell differentiation,flower                        |                                             | binding,hydrolase activity,kinase activity,nucleotide binding |
| ug3874     | 313                  |                                                                                                |                                                                                                                   |                                             |                                                               |
| ug3875     | 805                  |                                                                                                |                                                                                                                   |                                             |                                                               |
| ug3876     | 810                  | GO:0006810,GO:0009987,GO:0005622,GO:0                                                          | transport,cellular process                                                                                        | intracellular                               | transporter activity                                          |
| ug3877     | 170                  |                                                                                                |                                                                                                                   |                                             |                                                               |
| ug3878     | 882                  |                                                                                                |                                                                                                                   |                                             |                                                               |
| ug3879     | 429                  | GO:0005840,GO:0005198,GO:0009536,GO:0                                                          | translation                                                                                                       | ribosome,plastid                            | structural molecule activity                                  |
| ug3880     | 464                  | GO:0006464,GO:0000166,GO:0007165,GO:0                                                          | protein modification process,signal transduction                                                                  |                                             | nucleotide binding,kinase activity                            |
| ug3881     | 360                  |                                                                                                |                                                                                                                   |                                             |                                                               |
| ug3882     | 860                  | GO:0006464,GO:0005488,GO:0000166,GO:0                                                          | protein modification process                                                                                      |                                             | binding,nucleotide binding,kinase activity                    |
| ug3883     | 194                  |                                                                                                |                                                                                                                   |                                             |                                                               |
| ug3884     | 525                  |                                                                                                |                                                                                                                   |                                             |                                                               |
| ug3885     | 381                  |                                                                                                |                                                                                                                   |                                             |                                                               |
| ug3886     | 771                  |                                                                                                |                                                                                                                   |                                             |                                                               |
| ug3887     | 882                  | GO:0006950,GO:0006259,GO:0003824                                                               | response to stress,DNA metabolic process                                                                          |                                             | catalytic activity                                            |
|            |                      | GO:0006139,GO:0005975,GO:0005622,GO:0009058,GO:0009653,G                                       | nucleobase, nucleoside, nucleotide and nucleic acid metabolic process,carbohydrate metabolic process,biosynthetic |                                             |                                                               |
| ug3888     | 378                  | O:0016043,GO:0016049,GO:0003824,GO:0005488                                                     | process,anatomical structure morphogenesis,cellular component organization,cell growth                            | intracellular                               | catalytic activity,binding                                    |
| ug3889     | 278                  |                                                                                                |                                                                                                                   |                                             |                                                               |
| ug3890     | 335                  |                                                                                                |                                                                                                                   |                                             |                                                               |
| ug3891     | 261                  |                                                                                                |                                                                                                                   |                                             |                                                               |
|            |                      | GO:0005730,GO:0005773,GO:0005198,GO:0005840,GO:0005829,G                                       | translation                                                                                                       | nucleolus,vacuole,ribosome,cytosol,membrane | structural molecule activity                                  |
| ug3892     | 913                  | O:0016020,GO:000641                                                                            |                                                                                                                   |                                             |                                                               |
| ug3893     | 557                  |                                                                                                |                                                                                                                   |                                             |                                                               |
| ug3894     | 107                  |                                                                                                |                                                                                                                   |                                             |                                                               |
|            |                      | GO:0030246,GO:0019538,GO:0009987,GO:0                                                          | protein metabolic process,cellular process,response to stress,response to abiotic stimulus                        | vacuole,endoplasmic reticulum,mitochondrion | carbohydrate binding,protein binding                          |
| ug3895     | 571                  | 005773,GO:0005783,GO:0006950,GO:0005488,GO:0005515,GO:000                                      | carbohydrate metabolic process,cellular process,catabolic                                                         |                                             |                                                               |
| ug3896     | 852                  | 787,GO:0005576,GO:0005975,GO:0009987,G                                                         | process,cellular process,catabolic process                                                                        | cell wall,extracellular region              | hydrolase activity                                            |
|            |                      | GO:0004871,GO:0007165,GO:0005488,GO:0006629,GO:0016787                                         | signal transduction,lipid metabolic process                                                                       |                                             | signal transducer activity,protein binding,hydrolase activity |
| ug3897     | 706                  |                                                                                                |                                                                                                                   |                                             |                                                               |
| ug3898     | 364                  | GO:0016020,GO:0005                                                                             |                                                                                                                   | membrane,cell                               |                                                               |
| ug3899     | 294                  |                                                                                                |                                                                                                                   |                                             |                                                               |
| ug3900     | 654                  |                                                                                                |                                                                                                                   |                                             |                                                               |
| ug3901     | 121                  |                                                                                                |                                                                                                                   |                                             |                                                               |
| ug3902     | 874                  | GO:0006950,GO:0006259,GO:0030528,GO:0                                                          | response to stress,DNA metabolic process                                                                          |                                             | transcription regulator activity,protein binding              |
| ug3903     | 512                  |                                                                                                |                                                                                                                   |                                             |                                                               |
| ug3904     | 565                  | GO:0016020                                                                                     |                                                                                                                   | membrane                                    |                                                               |
| ug3905     | 792                  | GO:0006259,GO:0003676,GO:0005622,GO:0                                                          | DNA metabolic process                                                                                             | intracellular                               | nucleic acid binding,catalytic activity                       |
| ug3906     | 900                  | GO:0019538,GO:0009056,GO:0016787                                                               | protein metabolic process,catabolic process                                                                       |                                             | hydrolase activity                                            |
| ug3907     | 789                  | GO:0008152,GO:0009987,GO:0003824,GO:0                                                          | metabolic process,cellular process                                                                                |                                             | catalytic activity,protein binding                            |
|            |                      | GO:0016020,GO:0005                                                                             |                                                                                                                   |                                             |                                                               |
| ug3908     | 735                  | 515,GO:0005215,GO:0006810,GO:0009987,G                                                         | transport,cellular process                                                                                        | membrane,plasma membrane                    | protein binding,transporter activity                          |

| Unigene ID | sequence length (bp) | GO-ID                                                                                                                                                   | Biological process                                                                         | Cellular component                                                      | Molecular function                                                                      |
|------------|----------------------|---------------------------------------------------------------------------------------------------------------------------------------------------------|--------------------------------------------------------------------------------------------|-------------------------------------------------------------------------|-----------------------------------------------------------------------------------------|
| ug3909     | 622                  | GO:0009628,GO:0016787,GO:0005515,GO:000166,GO:0006950,GO:0019538,GO:000998                                                                              | response to abiotic stimulus,response to stress,protein metabolic process,cellular process |                                                                         | hydrolase activity,protein binding,nucleotide binding                                   |
| ug3910     | 664                  |                                                                                                                                                         |                                                                                            |                                                                         |                                                                                         |
| ug3911     | 781                  | GO:0005623,GO:000987,GO:0009056                                                                                                                         | cellular process,catabolic process                                                         | cell                                                                    |                                                                                         |
| ug3912     | 306                  |                                                                                                                                                         |                                                                                            |                                                                         |                                                                                         |
| ug3913     | 175                  |                                                                                                                                                         |                                                                                            |                                                                         |                                                                                         |
| ug3914     | 119                  |                                                                                                                                                         |                                                                                            |                                                                         |                                                                                         |
| ug3915     | 768                  |                                                                                                                                                         |                                                                                            |                                                                         |                                                                                         |
| ug3916     | 182                  |                                                                                                                                                         |                                                                                            |                                                                         |                                                                                         |
| ug3917     | 630                  |                                                                                                                                                         |                                                                                            |                                                                         |                                                                                         |
| ug3918     | 169                  |                                                                                                                                                         |                                                                                            |                                                                         |                                                                                         |
| ug3919     | 432                  |                                                                                                                                                         |                                                                                            |                                                                         |                                                                                         |
| ug3920     | 422                  | GO:0009536                                                                                                                                              |                                                                                            | plastid                                                                 |                                                                                         |
| ug3921     | 353                  | GO:0009058,GO:000987,GO:0006629                                                                                                                         | biosynthetic process,cellular process,lipid metabolic process                              |                                                                         |                                                                                         |
| ug3922     | 216                  | GO:0016020,GO:0009                                                                                                                                      |                                                                                            | membrane,plastid                                                        |                                                                                         |
| ug3923     | 591                  |                                                                                                                                                         |                                                                                            |                                                                         |                                                                                         |
| ug3924     | 757                  | GO:0019538,GO:000987,GO:0005829,GO:0                                                                                                                    | protein metabolic process,cellular process                                                 | cytosol                                                                 | protein binding                                                                         |
| ug3925     | 763                  |                                                                                                                                                         |                                                                                            |                                                                         |                                                                                         |
| ug3926     | 804                  | GO:0003676,GO:0000166                                                                                                                                   |                                                                                            |                                                                         | nucleic acid binding,nucleotide binding                                                 |
| ug3927     | 629                  | GO:0003723,GO:000908,GO:0005634                                                                                                                         | flower development                                                                         | nucleus                                                                 | RNA binding                                                                             |
| ug3928     | 809                  | GO:0006350                                                                                                                                              | transcription                                                                              |                                                                         |                                                                                         |
| ug3929     | 532                  | GO:0016020,GO:0005777,GO:0016043,GO:00008135,GO:0005622,GO:0005730,GO:0                                                                                 | cellular component organization,cellular process                                           | membrane,peroxisome                                                     |                                                                                         |
| ug3930     | 435                  | 006412,GO:0016020,GO:0009536,GO:0009579,GO:0016787,GO:0005773,GO:0005                                                                                   | translation                                                                                | intracellular,nucleolus,membrane,plastid,thylakoid,extracellular region | translation factor activity, nucleic acid binding,hydrolase activity,nucleotide binding |
| ug3931     | 148                  | 886,GO:0005215,GO:0006810,GO:0016020                                                                                                                    | transport                                                                                  | vacuole,plasma membrane,membrane                                        | transporter activity                                                                    |
| ug3932     | 226                  |                                                                                                                                                         |                                                                                            |                                                                         |                                                                                         |
| ug3933     | 241                  |                                                                                                                                                         |                                                                                            |                                                                         |                                                                                         |
| ug3934     | 813                  | GO:0008152,GO:0003824,GO:0005488,GO:0009536,GO:0030528,GO:0005622,GO:0003                                                                               | metabolic process                                                                          | plastid                                                                 | catalytic activity,binding,transcription regulator activity                             |
| ug3935     | 635                  | 677,GO:0016043,GO:0009987,GO:0009536,G                                                                                                                  | cellular component organization,cellular process                                           | intracellular,plastid,nucleus                                           | DNA binding                                                                             |
| ug3936     | 719                  |                                                                                                                                                         |                                                                                            |                                                                         |                                                                                         |
| ug3937     | 892                  | GO:0016740,GO:0009515,GO:0006810,GO:0                                                                                                                   |                                                                                            | plastid                                                                 | transferase activity                                                                    |
| ug3938     | 831                  | 009987,GO:0005635,GO:0030234,GO:0005783,GO:0006950,GO:000                                                                                               | transport,cellular process,response to stress,response to abiotic stimulus                 | plasma membrane,nuclear envelope,endoplasmic reticulum                  | protein binding,enzyme regulator activity                                               |
| ug3939     | 188                  |                                                                                                                                                         |                                                                                            |                                                                         |                                                                                         |
| ug3940     | 539                  | GO:0016020,GO:0006950,GO:0005576,GO:0007165,GO:0005618,GO:0005515,GO:000953,GO:0005515,GO:0016020,GO:0005737,GO:0005215,GO:0006810,GO:0009987,GO:000573 | response to stress,signal transduction                                                     | membrane,extracellular region,cell wall,plastid                         | protein binding                                                                         |
| ug3941     | 805                  |                                                                                                                                                         | transport,cellular process                                                                 | membrane,cytoplasm,mitochondrion                                        | protein binding,transporter activity                                                    |
| ug3942     | 204                  |                                                                                                                                                         |                                                                                            |                                                                         |                                                                                         |
| ug3943     | 555                  |                                                                                                                                                         |                                                                                            |                                                                         |                                                                                         |
| ug3944     | 754                  | GO:0016301,GO:0004871,GO:0006464,GO:000166,GO:0007165                                                                                                   | protein modification process,signal transduction                                           |                                                                         | kinase activity,signal transducer activity,nucleotide binding                           |
| ug3945     | 825                  | GO:0016787                                                                                                                                              |                                                                                            |                                                                         | hydrolase activity                                                                      |
| ug3946     | 210                  |                                                                                                                                                         |                                                                                            |                                                                         |                                                                                         |
| ug3947     | 671                  |                                                                                                                                                         |                                                                                            |                                                                         |                                                                                         |
| ug3948     | 775                  |                                                                                                                                                         |                                                                                            |                                                                         |                                                                                         |
| ug3949     | 869                  | GO:0016020,GO:0005737,GO:0006810,GO:0                                                                                                                   | transport,cellular process                                                                 | membrane,cytoplasm                                                      |                                                                                         |
| ug3950     | 274                  |                                                                                                                                                         |                                                                                            |                                                                         |                                                                                         |
| ug3951     | 752                  | GO:0019538,GO:000987,GO:0005515,GO:000166,GO:0009536                                                                                                    | protein metabolic process,cellular process                                                 | plastid                                                                 | protein binding,nucleotide binding                                                      |
| ug3952     | 547                  |                                                                                                                                                         |                                                                                            |                                                                         |                                                                                         |
| ug3953     | 100                  |                                                                                                                                                         |                                                                                            |                                                                         |                                                                                         |

| Unigene ID | sequence length (bp) | GO-ID                                                                                                                                                                      | Biological process                                                                                                                                     | Cellular component                                      | Molecular function                                                 |
|------------|----------------------|----------------------------------------------------------------------------------------------------------------------------------------------------------------------------|--------------------------------------------------------------------------------------------------------------------------------------------------------|---------------------------------------------------------|--------------------------------------------------------------------|
| ug3954     | 335                  | GO:0009987,GO:000575,GO:0000166,GO:016043,GO:0005198,GO:0016787,GO:000585                                                                                                  | cellular process,cellular component organization                                                                                                       | cellular_component,cytoskeleton                         | nucleotide binding,structural molecule activity,hydrolase activity |
| ug3955     | 209                  | GO:0016740,GO:0007267,GO:0040029,GO:0006139,GO:0003677,GO:0016043,GO:0006350,GO:0009987,GO:0005634                                                                         | cell-cell signaling,regulation of gene expression, epigenetic,nucleobase, nucleoside, nucleotide and nucleic acid metabolic process,cellular component | nucleus                                                 | transferase activity,DNA binding                                   |
| ug3956     | 287                  |                                                                                                                                                                            |                                                                                                                                                        |                                                         |                                                                    |
| ug3957     | 715                  |                                                                                                                                                                            |                                                                                                                                                        |                                                         |                                                                    |
| ug3958     | 776                  |                                                                                                                                                                            |                                                                                                                                                        |                                                         |                                                                    |
| ug3959     | 319                  |                                                                                                                                                                            |                                                                                                                                                        |                                                         |                                                                    |
| ug3960     | 881                  | GO:0019538,GO:0009056,GO:0009987,GO:0003824,GO:0006464                                                                                                                     | protein metabolic process,catabolic process,cellular process,protein modification process                                                              |                                                         | catalytic activity                                                 |
| ug3961     | 664                  |                                                                                                                                                                            |                                                                                                                                                        |                                                         |                                                                    |
| ug3962     | 107                  |                                                                                                                                                                            |                                                                                                                                                        |                                                         |                                                                    |
| ug3963     | 322                  |                                                                                                                                                                            |                                                                                                                                                        |                                                         |                                                                    |
| ug3964     | 803                  |                                                                                                                                                                            |                                                                                                                                                        |                                                         |                                                                    |
| ug3965     | 534                  |                                                                                                                                                                            |                                                                                                                                                        |                                                         |                                                                    |
| ug3966     | 183                  |                                                                                                                                                                            |                                                                                                                                                        |                                                         |                                                                    |
| ug3967     | 137                  |                                                                                                                                                                            |                                                                                                                                                        |                                                         |                                                                    |
| ug3968     | 147                  |                                                                                                                                                                            |                                                                                                                                                        |                                                         |                                                                    |
| ug3969     | 709                  | GO:0005622,GO:0003677,GO:0016043,GO:0009987,GO:0005634                                                                                                                     | cellular component organization,cellular process                                                                                                       | intracellular,nucleus                                   | DNA binding                                                        |
| ug3970     | 202                  |                                                                                                                                                                            |                                                                                                                                                        |                                                         |                                                                    |
| ug3971     | 460                  | GO:0006464,GO:0000166,GO:0016301                                                                                                                                           | protein modification process                                                                                                                           |                                                         | nucleotide binding,kinase activity                                 |
| ug3972     | 464                  |                                                                                                                                                                            |                                                                                                                                                        |                                                         |                                                                    |
| ug3973     | 645                  | GO:0008152,GO:0005737,GO:0003824,GO:0005618,GO:0003824,GO:0005488,GO:000824,GO:0005488,GO:0005886,GO:0009653,GO:0016043,GO:0016049,GO:0016020,GO:000604,GO:0016020,GO:0009 | metabolic process                                                                                                                                      | cytoplasm                                               | catalytic activity                                                 |
| ug3974     | 909                  | GO:0005886,GO:0009653,GO:0016043,GO:0016049,GO:0016020,GO:000604,GO:0016020,GO:0009                                                                                        | anatomical structure morphogenesis,cellular component organization,cell growth                                                                         | cell wall,plasma membrane,membrane,extracellular region | catalytic activity,binding                                         |
| ug3975     | 604                  | GO:0016020,GO:0009                                                                                                                                                         | response to biotic stimulus                                                                                                                            | membrane                                                |                                                                    |
| ug3976     | 257                  |                                                                                                                                                                            |                                                                                                                                                        |                                                         |                                                                    |
| ug3977     | 356                  |                                                                                                                                                                            |                                                                                                                                                        |                                                         |                                                                    |
| ug3978     | 911                  | GO:0005886                                                                                                                                                                 |                                                                                                                                                        | plasma membrane                                         |                                                                    |
| ug3979     | 248                  |                                                                                                                                                                            |                                                                                                                                                        |                                                         |                                                                    |
| ug3980     | 494                  |                                                                                                                                                                            |                                                                                                                                                        |                                                         |                                                                    |
| ug3981     | 422                  |                                                                                                                                                                            |                                                                                                                                                        |                                                         |                                                                    |
| ug3982     | 771                  |                                                                                                                                                                            |                                                                                                                                                        |                                                         |                                                                    |
| ug3983     | 238                  |                                                                                                                                                                            |                                                                                                                                                        |                                                         |                                                                    |
| ug3984     | 374                  |                                                                                                                                                                            |                                                                                                                                                        |                                                         |                                                                    |
| ug3985     | 481                  |                                                                                                                                                                            |                                                                                                                                                        |                                                         |                                                                    |
| ug3986     | 854                  | GO:0005737,GO:0016                                                                                                                                                         |                                                                                                                                                        | cytoplasm                                               | hydrolase activity                                                 |
| ug3987     | 414                  |                                                                                                                                                                            |                                                                                                                                                        |                                                         |                                                                    |
| ug3988     | 606                  |                                                                                                                                                                            |                                                                                                                                                        |                                                         |                                                                    |
| ug3989     | 202                  |                                                                                                                                                                            |                                                                                                                                                        |                                                         |                                                                    |
| ug3990     | 683                  |                                                                                                                                                                            |                                                                                                                                                        |                                                         |                                                                    |
| ug3991     | 791                  | GO:0003677,GO:0005634,GO:0006350                                                                                                                                           | transcription                                                                                                                                          | nucleus                                                 | DNA binding                                                        |
| ug3992     | 886                  |                                                                                                                                                                            |                                                                                                                                                        |                                                         |                                                                    |
| ug3993     | 304                  |                                                                                                                                                                            |                                                                                                                                                        |                                                         |                                                                    |
| ug3994     | 362                  |                                                                                                                                                                            |                                                                                                                                                        |                                                         |                                                                    |
| ug3995     | 133                  |                                                                                                                                                                            |                                                                                                                                                        |                                                         |                                                                    |
| ug3996     | 508                  |                                                                                                                                                                            |                                                                                                                                                        |                                                         |                                                                    |
| ug3997     | 578                  |                                                                                                                                                                            |                                                                                                                                                        |                                                         |                                                                    |
| ug3998     | 532                  | GO:0005739                                                                                                                                                                 |                                                                                                                                                        | mitochondrion                                           |                                                                    |
| ug3999     | 543                  |                                                                                                                                                                            |                                                                                                                                                        |                                                         |                                                                    |
| ug4000     | 791                  | GO:0005840,GO:0005198,GO:0009536,GO:0006412,GO:0003723                                                                                                                     | translation                                                                                                                                            | ribosome,plastid                                        | structural molecule activity,RNA binding                           |
| ug4001     | 843                  | GO:0009058,GO:0009987,GO:0006629,GO:000                                                                                                                                    | biosynthetic process,cellular process,lipid metabolic process                                                                                          |                                                         | transferase activity                                               |
| ug4002     | 274                  |                                                                                                                                                                            |                                                                                                                                                        |                                                         |                                                                    |
| ug4003     | 428                  | GO:0009719                                                                                                                                                                 | response to endogenous stimulus                                                                                                                        |                                                         |                                                                    |
| ug4004     | 313                  |                                                                                                                                                                            |                                                                                                                                                        |                                                         |                                                                    |
| ug4005     | 208                  |                                                                                                                                                                            |                                                                                                                                                        |                                                         |                                                                    |
| ug4006     | 206                  |                                                                                                                                                                            |                                                                                                                                                        |                                                         |                                                                    |
| ug4007     | 854                  | GO:0016020,GO:0005886,GO:0005886,GO:0005                                                                                                                                   |                                                                                                                                                        | membrane,cell                                           |                                                                    |
| ug4008     | 757                  | GO:0016020,GO:0005215,GO:0006810                                                                                                                                           | transport                                                                                                                                              | plasma membrane,vacuole,membrane                        | transporter activity                                               |
| ug4009     | 829                  |                                                                                                                                                                            |                                                                                                                                                        |                                                         |                                                                    |



| Unigene ID | sequence length (bp) | GO-ID                                                                                                                                                                         | Biological process                                                                                                                                  | Cellular component                   | Molecular function                                                 |
|------------|----------------------|-------------------------------------------------------------------------------------------------------------------------------------------------------------------------------|-----------------------------------------------------------------------------------------------------------------------------------------------------|--------------------------------------|--------------------------------------------------------------------|
| ug4010     | 848                  | GO:0006464,GO:0005886,GO:0005515,GO:000166,GO:0016301                                                                                                                         | protein modification process                                                                                                                        | plasma membrane                      | protein binding,nucleotide binding,kinase activity                 |
| ug4011     | 566                  |                                                                                                                                                                               |                                                                                                                                                     |                                      |                                                                    |
| ug4012     | 503                  |                                                                                                                                                                               |                                                                                                                                                     |                                      |                                                                    |
| ug4013     | 512                  |                                                                                                                                                                               |                                                                                                                                                     |                                      |                                                                    |
| ug4014     | 279                  |                                                                                                                                                                               |                                                                                                                                                     |                                      |                                                                    |
| ug4015     | 881                  | GO:0009536                                                                                                                                                                    |                                                                                                                                                     | plastid                              |                                                                    |
| ug4016     | 740                  |                                                                                                                                                                               |                                                                                                                                                     |                                      |                                                                    |
| ug4017     | 672                  |                                                                                                                                                                               |                                                                                                                                                     |                                      |                                                                    |
| ug4018     | 595                  | GO:0005515                                                                                                                                                                    |                                                                                                                                                     |                                      | protein binding                                                    |
| ug4019     | 699                  |                                                                                                                                                                               |                                                                                                                                                     |                                      |                                                                    |
| ug4020     | 736                  | GO:0016787,GO:0005670                                                                                                                                                         |                                                                                                                                                     | cell wall                            | hydrolase activity                                                 |
| ug4021     | 670                  |                                                                                                                                                                               |                                                                                                                                                     |                                      |                                                                    |
| ug4022     | 650                  |                                                                                                                                                                               |                                                                                                                                                     |                                      |                                                                    |
| ug4023     | 339                  | GO:0008152,GO:0016737,GO:0003824                                                                                                                                              | metabolic process                                                                                                                                   |                                      | hydrolase activity                                                 |
| ug4024     | 376                  | GO:0019725,GO:0005515,GO:0003824                                                                                                                                              | cellular homeostasis                                                                                                                                | cytoplasm                            | catalytic activity                                                 |
| ug4025     | 706                  | GO:0005215,GO:0006810,GO:0008152,GO:000336                                                                                                                                    | transport,metabolic process                                                                                                                         | plasma membrane                      | transporter activity                                               |
| ug4026     | 336                  |                                                                                                                                                                               |                                                                                                                                                     |                                      |                                                                    |
| ug4027     | 236                  | GO:0005488,GO:0009058,GO:0009987,GO:0003824,GO:0015979                                                                                                                        | biosynthetic process,cellular process,photosynthesis                                                                                                |                                      | binding,catalytic activity                                         |
| ug4028     | 754                  |                                                                                                                                                                               |                                                                                                                                                     |                                      |                                                                    |
| ug4029     | 707                  | GO:0003824,GO:0009058,GO:0009987,GO:000659                                                                                                                                    | biosynthetic process,cellular process                                                                                                               | plastid                              | catalytic activity                                                 |
| ug4030     | 659                  |                                                                                                                                                                               |                                                                                                                                                     |                                      |                                                                    |
| ug4031     | 763                  | GO:0006350,GO:0003700,GO:0005634                                                                                                                                              | transcription                                                                                                                                       | nucleus                              | transcription factor activity                                      |
| ug4032     | 789                  | GO:0000003,GO:0009791,GO:0009790,GO:0009536,GO:0006410,GO:0016740,GO:0009606                                                                                                  | reproduction,post-embryonic development,embryonic development,translation                                                                           | ribosome,plastid                     | structural molecule activity                                       |
| ug4033     | 606                  | GO:0005975,GO:0009987,GO:0016020                                                                                                                                              | biosynthetic process,carbohydrate metabolic process,cellular process                                                                                | membrane                             | transferase activity                                               |
| ug4034     | 507                  | GO:0016740,GO:0009058,GO:0005975,GO:000689                                                                                                                                    | biosynthetic process,carbohydrate metabolic process,cellular process                                                                                |                                      | transferase activity                                               |
| ug4035     | 689                  |                                                                                                                                                                               |                                                                                                                                                     |                                      |                                                                    |
| ug4036     | 842                  |                                                                                                                                                                               |                                                                                                                                                     |                                      |                                                                    |
| ug4037     | 507                  | GO:0005488,GO:0005515,GO:0005215,GO:00016020,GO:0005739,GO:0006810,GO:001604                                                                                                  | transport,cellular component organization,cellular process                                                                                          | membrane,mitochondrion               | binding,protein binding,transporter activity                       |
| ug4038     | 738                  |                                                                                                                                                                               |                                                                                                                                                     |                                      |                                                                    |
| ug4039     | 840                  | GO:0008152,GO:0016737,GO:0016020,GO:0005739,GO:0003824,GO:0005215,GO:0016787,GO:0006810,GO:0019538,GO:0009056,GO:000691                                                       | metabolic process                                                                                                                                   |                                      | hydrolase activity                                                 |
| ug4040     | 483                  | GO:0008152,GO:0016737,GO:0005215,GO:0016787,GO:0006810,GO:0019538,GO:0009056,GO:000691                                                                                        | transport,protein metabolic process,catabolic process,generation of precursor metabolites and energy                                                | membrane,mitochondrion               | catalytic activity,transporter activity,hydrolase activity,binding |
| ug4041     | 691                  | GO:0005739                                                                                                                                                                    |                                                                                                                                                     | mitochondrion                        |                                                                    |
| ug4042     | 535                  | GO:0009058,GO:0009987,GO:0006629,GO:000604                                                                                                                                    | biosynthetic process,cellular process,lipid metabolic process                                                                                       |                                      | transferase activity                                               |
| ug4043     | 604                  |                                                                                                                                                                               |                                                                                                                                                     |                                      |                                                                    |
| ug4044     | 631                  |                                                                                                                                                                               |                                                                                                                                                     |                                      |                                                                    |
| ug4045     | 730                  |                                                                                                                                                                               |                                                                                                                                                     |                                      |                                                                    |
| ug4046     | 304                  |                                                                                                                                                                               |                                                                                                                                                     |                                      |                                                                    |
| ug4047     | 261                  |                                                                                                                                                                               |                                                                                                                                                     |                                      |                                                                    |
| ug4048     | 751                  | GO:0005739                                                                                                                                                                    |                                                                                                                                                     | mitochondrion                        |                                                                    |
| ug4049     | 645                  | GO:0005215,GO:0005739,GO:000739,GO:0016020,GO:0006810,GO:0009058,GO:0006091,GO:0006139,GO:0008289,GO:0005488,GO:0005215,GO:0005739,GO:0003674,GO:0006091,GO:0009056,GO:000016 | transport,biosynthetic process,generation of precursor metabolites and energy,nucleobase, nucleoside, nucleotide and nucleic acid metabolic process | mitochondrion,membrane,intracellular | transporter activity,lipid binding                                 |
| ug4050     | 733                  | GO:0005488,GO:0005215,GO:0005739,GO:0006091                                                                                                                                   |                                                                                                                                                     | intracellular                        | binding                                                            |
| ug4051     | 901                  |                                                                                                                                                                               |                                                                                                                                                     |                                      |                                                                    |
| ug4052     | 526                  |                                                                                                                                                                               |                                                                                                                                                     |                                      |                                                                    |
| ug4053     | 894                  |                                                                                                                                                                               |                                                                                                                                                     |                                      |                                                                    |
| ug4054     | 605                  | GO:0016020,GO:0008152                                                                                                                                                         | cell death                                                                                                                                          | membrane                             |                                                                    |
| ug4055     | 379                  |                                                                                                                                                                               |                                                                                                                                                     |                                      |                                                                    |
| ug4056     | 213                  |                                                                                                                                                                               |                                                                                                                                                     |                                      |                                                                    |
| ug4057     | 106                  |                                                                                                                                                                               |                                                                                                                                                     |                                      |                                                                    |
| ug4058     | 513                  | GO:0005618,GO:0016020,GO:0005739,GO:0003674,GO:0006091,GO:0009056,GO:000016                                                                                                   | generation of precursor metabolites and energy,catabolic process                                                                                    | cell wall,membrane,mitochondrion     | molecular_function,nucleotide binding,catalytic activity           |
| ug4059     | 526                  | GO:0016787,GO:0009281                                                                                                                                                         |                                                                                                                                                     | plastid                              | hydrolase activity                                                 |
| ug4060     | 281                  |                                                                                                                                                                               |                                                                                                                                                     |                                      |                                                                    |

| Unigene ID | sequence length (bp) | GO-ID                                                                                                         | Biological process                                                                                                                                                                               | Cellular component                                               | Molecular function                                                         |
|------------|----------------------|---------------------------------------------------------------------------------------------------------------|--------------------------------------------------------------------------------------------------------------------------------------------------------------------------------------------------|------------------------------------------------------------------|----------------------------------------------------------------------------|
| ug4061     | 858                  |                                                                                                               |                                                                                                                                                                                                  |                                                                  |                                                                            |
| ug4062     | 546                  | GO:0008152,GO:0008152                                                                                         | metabolic process,biological_process                                                                                                                                                             |                                                                  | catalytic activity,binding                                                 |
| ug4063     | 225                  | GO:0005515                                                                                                    |                                                                                                                                                                                                  |                                                                  | protein binding                                                            |
| ug4064     | 853                  | GO:0005739                                                                                                    |                                                                                                                                                                                                  | mitochondrion                                                    |                                                                            |
| ug4065     | 898                  | GO:0005737,GO:0005152,GO:006810,GO:0009987,G                                                                  | transport,cellular process                                                                                                                                                                       | cytoplasm,membrane                                               | protein binding,transporter activity                                       |
| ug4066     | 816                  |                                                                                                               |                                                                                                                                                                                                  |                                                                  |                                                                            |
| ug4067     | 662                  | GO:0005488,GO:0008152,GO:0009536,GO:016740,GO:0009058,G                                                       | biological_process,biosynthetic process,cellular amino acid and derivative metabolic process                                                                                                     | plastid                                                          | binding,transferase activity                                               |
| ug4068     | 357                  |                                                                                                               |                                                                                                                                                                                                  |                                                                  |                                                                            |
| ug4069     | 771                  |                                                                                                               |                                                                                                                                                                                                  |                                                                  |                                                                            |
| ug4070     | 667                  | GO:0005488,GO:000824,GO:0008152,GO:0009058,GO:0009987,GO:0009536,GO:001597                                    | metabolic process,biosynthetic process,cellular process,photosynthesis                                                                                                                           | plastid                                                          | binding,catalytic activity                                                 |
| ug4071     | 341                  |                                                                                                               |                                                                                                                                                                                                  |                                                                  |                                                                            |
| ug4072     | 325                  |                                                                                                               |                                                                                                                                                                                                  |                                                                  |                                                                            |
| ug4073     | 195                  |                                                                                                               |                                                                                                                                                                                                  |                                                                  |                                                                            |
| ug4074     | 863                  | GO:0005739,GO:0009                                                                                            |                                                                                                                                                                                                  | mitochondrion,plastid                                            |                                                                            |
| ug4075     | 379                  |                                                                                                               |                                                                                                                                                                                                  |                                                                  |                                                                            |
| ug4076     | 197                  |                                                                                                               |                                                                                                                                                                                                  |                                                                  |                                                                            |
| ug4077     | 698                  | GO:0016740,GO:0005794,GO:0009058,GO:006464,GO:0005975,GO:0016020,GO:000573                                    | biosynthetic process,protein modification process,carbohydrate metabolic process                                                                                                                 | Golgi apparatus,membrane,mitochondrion                           | transferase activity                                                       |
| ug4078     | 575                  |                                                                                                               |                                                                                                                                                                                                  |                                                                  |                                                                            |
| ug4079     | 797                  | GO:0016740                                                                                                    |                                                                                                                                                                                                  |                                                                  | transferase activity                                                       |
| ug4080     | 167                  |                                                                                                               |                                                                                                                                                                                                  |                                                                  |                                                                            |
| ug4081     | 196                  |                                                                                                               |                                                                                                                                                                                                  |                                                                  |                                                                            |
| ug4082     | 663                  | GO:0009536                                                                                                    |                                                                                                                                                                                                  | plastid                                                          |                                                                            |
| ug4083     | 140                  |                                                                                                               |                                                                                                                                                                                                  |                                                                  |                                                                            |
| ug4084     | 799                  | GO:0005739,GO:0005975,GO:0009987,GO:0009536,GO:0016301,GO:0005622,GO:0003                                     | carbohydrate metabolic process,cellular process                                                                                                                                                  | mitochondrion,plastid                                            | kinase activity                                                            |
| ug4085     | 604                  | GO:0016043,GO:0009987,GO:0005634,GO:0016020,GO:0005                                                           | cellular component organization,cellular process                                                                                                                                                 | intracellular,nucleus                                            | DNA binding                                                                |
| ug4086     | 720                  | GO:0016020,GO:0005215,GO:0006810,GO:0                                                                         | transport,cellular process                                                                                                                                                                       | membrane                                                         | transporter activity                                                       |
| ug4087     | 878                  | GO:0000166,GO:0005777,GO:0008152,GO:0006139,GO:0005975,GO:0009056,GO:0019748,GO:0003824,GO:0006950,GO:0009628 | metabolic process,nucleobase, nucleoside, nucleotide and nucleic acid metabolic process,carbohydrate metabolic process,catabolic process,secondary metabolic process,response to stress,response | peroxisome                                                       | nucleotide binding,catalytic activity                                      |
| ug4088     | 144                  |                                                                                                               |                                                                                                                                                                                                  |                                                                  |                                                                            |
| ug4089     | 816                  |                                                                                                               |                                                                                                                                                                                                  |                                                                  |                                                                            |
| ug4090     | 267                  |                                                                                                               |                                                                                                                                                                                                  |                                                                  |                                                                            |
| ug4091     | 510                  | GO:0006950,GO:0009607                                                                                         | response to stress,response to biotic stimulus                                                                                                                                                   |                                                                  |                                                                            |
| ug4092     | 405                  |                                                                                                               |                                                                                                                                                                                                  |                                                                  |                                                                            |
| ug4093     | 819                  | GO:0016020                                                                                                    |                                                                                                                                                                                                  | membrane                                                         |                                                                            |
| ug4094     | 745                  |                                                                                                               |                                                                                                                                                                                                  |                                                                  |                                                                            |
| ug4095     | 274                  |                                                                                                               |                                                                                                                                                                                                  |                                                                  |                                                                            |
| ug4096     | 406                  | GO:0005739                                                                                                    |                                                                                                                                                                                                  | mitochondrion                                                    |                                                                            |
| ug4097     | 699                  | GO:0003824,GO:0005737,GO:0005618,GO:0006091,GO:0005783,G                                                      | generation of precursor metabolites and energy                                                                                                                                                   | cytoplasm,cell wall,endoplasmic reticulum                        | catalytic activity,molecular_function                                      |
| ug4098     | 339                  |                                                                                                               |                                                                                                                                                                                                  |                                                                  |                                                                            |
| ug4099     | 431                  | GO:0003824,GO:0008152,GO:0005975,GO:0006091,GO:0009056,GO:0009536,GO:0009058,GO:0009                          | metabolic process,carbohydrate metabolic process,generation of precursor metabolites and energy,catabolic process                                                                                | plastid                                                          | catalytic activity                                                         |
| ug4100     | 533                  | GO:0016020,GO:0005739,GO:0005622,GO:0016787,GO:0005215,GO:0005515,GO:0                                        | biosynthetic process,cellular process                                                                                                                                                            | membrane,mitochondrion,intracellular                             |                                                                            |
| ug4101     | 898                  | GO:0003824,GO:0005737,GO:0016020,GO:0009536,GO:0005783,GO:000                                                 |                                                                                                                                                                                                  | cytoplasm,membrane,plastid,endoplasmic reticulum,plasma membrane | hydrolase activity,transporter activity,protein binding,catalytic activity |
| ug4102     | 546                  |                                                                                                               |                                                                                                                                                                                                  |                                                                  |                                                                            |
| ug4103     | 689                  | GO:0016787,GO:0005                                                                                            |                                                                                                                                                                                                  |                                                                  | hydrolase activity,binding                                                 |
| ug4104     | 663                  |                                                                                                               |                                                                                                                                                                                                  |                                                                  |                                                                            |
| ug4105     | 277                  |                                                                                                               |                                                                                                                                                                                                  |                                                                  |                                                                            |
| ug4106     | 173                  |                                                                                                               |                                                                                                                                                                                                  |                                                                  |                                                                            |

| Unigene ID | sequence length (bp) | GO-ID                                                    | Biological process                                                                                        | Cellular component                                      | Molecular function                       |
|------------|----------------------|----------------------------------------------------------|-----------------------------------------------------------------------------------------------------------|---------------------------------------------------------|------------------------------------------|
| ug4107     | 520                  | GO:0005576,GO:0016043,GO:0009987,GO:0                    | cellular component<br>organization,cellular process                                                       | extracellular region,membrane                           |                                          |
| ug4108     | 372                  |                                                          |                                                                                                           |                                                         |                                          |
| ug4109     | 321                  |                                                          |                                                                                                           |                                                         |                                          |
| ug4110     | 621                  |                                                          |                                                                                                           |                                                         |                                          |
| ug4111     | 342                  |                                                          |                                                                                                           |                                                         |                                          |
| ug4112     | 488                  |                                                          |                                                                                                           |                                                         |                                          |
| ug4113     | 806                  |                                                          |                                                                                                           |                                                         |                                          |
| ug4114     | 841                  | GO:0005737,GO:0016                                       |                                                                                                           | cytoplasm,membrane                                      |                                          |
| ug4115     | 473                  | GO:0005488,GO:0006950,GO:0009628                         | response to stress,response to<br>abiotic stimulus                                                        |                                                         | binding                                  |
| ug4116     | 677                  |                                                          |                                                                                                           |                                                         |                                          |
| ug4117     | 916                  |                                                          |                                                                                                           |                                                         |                                          |
| ug4118     | 864                  | GO:0003824,GO:0019538,GO:0009056,GO:0009987,GO:0005515   | protein metabolic process,catabolic<br>process,cellular process                                           |                                                         | catalytic activity,protein<br>binding    |
| ug4119     | 460                  | GO:0016787                                               |                                                                                                           |                                                         | hydrolase activity                       |
| ug4120     | 176                  |                                                          |                                                                                                           |                                                         |                                          |
| ug4121     | 506                  |                                                          |                                                                                                           |                                                         |                                          |
| ug4122     | 829                  | GO:0009536                                               |                                                                                                           | plastid                                                 |                                          |
| ug4123     | 460                  | GO:0005488,GO:0008150,GO:0009536,GO:0016740,GO:0009058,G | biological_process,biosynthetic<br>process,cellular amino acid and<br>derivative metabolic process        | plastid                                                 | binding,transferase activity             |
| ug4124     | 787                  |                                                          |                                                                                                           |                                                         |                                          |
| ug4125     | 191                  |                                                          |                                                                                                           |                                                         |                                          |
| ug4126     | 151                  |                                                          |                                                                                                           |                                                         |                                          |
| ug4127     | 531                  |                                                          |                                                                                                           |                                                         |                                          |
| ug4128     | 527                  |                                                          |                                                                                                           |                                                         |                                          |
| ug4129     | 880                  | GO:0006259,GO:0009058,GO:0005515,GO:0005634,GO:0008152,G | DNA metabolic<br>process,biosynthetic<br>process,metabolic process,cellular<br>process,response to stress | nucleus                                                 | protein binding                          |
| ug4130     | 181                  |                                                          |                                                                                                           |                                                         |                                          |
| ug4131     | 396                  | GO:0009536                                               |                                                                                                           | plastid                                                 |                                          |
| ug4132     | 274                  |                                                          |                                                                                                           |                                                         |                                          |
| ug4133     | 549                  | GO:0016020,GO:0009                                       |                                                                                                           | membrane,plastid                                        |                                          |
| ug4134     | 109                  |                                                          |                                                                                                           |                                                         |                                          |
| ug4135     | 534                  |                                                          |                                                                                                           |                                                         |                                          |
| ug4136     | 456                  | GO:0005488,GO:0003674,GO:0009536                         |                                                                                                           | plastid                                                 | binding,molecular_function               |
| ug4137     | 856                  | GO:0005622,GO:0019538,GO:0009056,GO:0009987,GO:0005634,G | protein metabolic process,catabolic<br>process,cellular process                                           | intracellular,nucleus,cytosol                           | hydrolase activity                       |
| ug4138     | 189                  |                                                          |                                                                                                           |                                                         |                                          |
| ug4139     | 176                  |                                                          |                                                                                                           |                                                         |                                          |
| ug4140     | 703                  |                                                          |                                                                                                           |                                                         |                                          |
| ug4141     | 805                  | GO:0003700,GO:0005634,GO:0005488,GO:0                    | transcription                                                                                             | nucleus                                                 | transcription factor<br>activity,binding |
| ug4142     | 799                  | GO:0005840,GO:0005198,GO:0006412,GO:0                    | translation                                                                                               | ribosome,plastid                                        | structural molecule activity             |
| ug4143     | 660                  | GO:0005488                                               |                                                                                                           |                                                         | binding                                  |
| ug4144     | 758                  | GO:0016787                                               |                                                                                                           |                                                         | hydrolase activity                       |
| ug4145     | 855                  | GO:0016301,GO:0005634,GO:0005488,GO:0                    |                                                                                                           | nucleus,plasma membrane                                 | kinase activity,binding                  |
| ug4146     | 609                  | GO:0005886,GO:0005622,GO:0006810,GO:0009987,GO:0016020,G | transport,cellular process                                                                                | plasma<br>membrane,intracellular,membrane,G             |                                          |
| ug4147     | 837                  | GO:0005515,GO:0005737,GO:0003723                         |                                                                                                           | cytoplasm                                               | protein binding,RNA binding              |
| ug4148     | 302                  |                                                          |                                                                                                           |                                                         |                                          |
| ug4149     | 103                  |                                                          |                                                                                                           |                                                         |                                          |
| ug4150     | 563                  | GO:0005515                                               |                                                                                                           |                                                         | protein binding                          |
| ug4151     | 837                  | GO:0006091,GO:0015979,GO:0016020,GO:0009579,GO:0005488,G | generation of precursor metabolites<br>and energy,photosynthesis,protein<br>modification process          | membrane,thylakoid,plastid                              | binding                                  |
| ug4152     | 824                  | GO:0005515,GO:00050009058,GO:0005975,GO:0015979,GO:0     |                                                                                                           | mitochondrion                                           | protein binding                          |
| ug4153     | 676                  | GO:0003824,GO:0005515,G                                  | biosynthetic process,carbohydrate<br>metabolic process,photosynthesis                                     | plastid,thylakoid,extracellular<br>region,mitochondrion | catalytic activity,protein<br>binding    |
| ug4154     | 353                  |                                                          |                                                                                                           |                                                         |                                          |
| ug4155     | 589                  | GO:0003677,GO:0006350,GO:0005634                         | transcription                                                                                             | nucleus                                                 | DNA binding                              |
| ug4156     | 857                  | GO:0000166                                               |                                                                                                           |                                                         | nucleotide binding                       |
| ug4157     | 629                  | GO:0006412,GO:0009                                       | translation                                                                                               | plastid                                                 |                                          |
| ug4158     | 333                  |                                                          |                                                                                                           |                                                         |                                          |
| ug4159     | 297                  |                                                          |                                                                                                           |                                                         |                                          |

| <b>Unigene ID</b> | <b>sequence length (bp)</b> | <b>GO-ID</b>                                                                                                                                                                     | <b>Biological process</b>                                                                 | <b>Cellular component</b>              | <b>Molecular function</b>                                         |
|-------------------|-----------------------------|----------------------------------------------------------------------------------------------------------------------------------------------------------------------------------|-------------------------------------------------------------------------------------------|----------------------------------------|-------------------------------------------------------------------|
| ug4160            | 704                         | GO:0003676                                                                                                                                                                       |                                                                                           |                                        | nucleic acid binding                                              |
| ug4161            | 523                         | GO:0005886                                                                                                                                                                       |                                                                                           | plasma membrane                        |                                                                   |
| ug4162            | 861                         |                                                                                                                                                                                  |                                                                                           |                                        |                                                                   |
| ug4163            | 868                         | GO:0005737,GO:0005773,GO:0005886                                                                                                                                                 |                                                                                           | cytoplasm,vacuole,plasma membrane      |                                                                   |
| ug4164            | 353                         |                                                                                                                                                                                  |                                                                                           |                                        |                                                                   |
| ug4165            | 787                         |                                                                                                                                                                                  |                                                                                           |                                        |                                                                   |
| ug4166            | 434                         |                                                                                                                                                                                  |                                                                                           |                                        |                                                                   |
| ug4167            | 473                         | GO:0016787,GO:000987,GO:0009056                                                                                                                                                  | cellular process,catabolic process                                                        |                                        | hydrolase activity                                                |
| ug4168            | 638                         | GO:0000166,GO:0005737,GO:0003824,GO:0008152,GO:000166,GO:0005739                                                                                                                 |                                                                                           | intracellular                          | nucleotide binding                                                |
| ug4169            | 474                         | GO:0003824,GO:0008152,GO:0005488                                                                                                                                                 | metabolic process                                                                         |                                        | catalytic activity,binding                                        |
| ug4170            | 744                         |                                                                                                                                                                                  |                                                                                           |                                        |                                                                   |
| ug4171            | 231                         | GO:0003824,GO:0008152,GO:000166,GO:0005739                                                                                                                                       | biological_process,metabolic process                                                      | mitochondrion                          | catalytic activity,nucleotide binding                             |
| ug4172            | 210                         | GO:0009536                                                                                                                                                                       |                                                                                           | plastid                                |                                                                   |
| ug4173            | 800                         | GO:0016020,GO:000635,GO:0005488,GO:0006810,GO:0016043,GO:0009987,GO:0005739                                                                                                      | transport,cellular component organization,cellular process                                | membrane,nuclear envelope,cytoplasm    | binding,transporter activity                                      |
| ug4174            | 611                         |                                                                                                                                                                                  |                                                                                           |                                        |                                                                   |
| ug4175            | 671                         | GO:0005840,GO:000198,GO:0006412                                                                                                                                                  | translation                                                                               | ribosome                               | structural molecule activity                                      |
| ug4176            | 301                         |                                                                                                                                                                                  |                                                                                           |                                        |                                                                   |
| ug4177            | 438                         | GO:0005737                                                                                                                                                                       |                                                                                           | cytoplasm                              |                                                                   |
| ug4178            | 399                         |                                                                                                                                                                                  |                                                                                           |                                        |                                                                   |
| ug4179            | 477                         | GO:0005515,GO:000165,GO:0009719,GO:0003723                                                                                                                                       | signal transduction,response to endogenous stimulus                                       | mitochondrion                          | protein binding                                                   |
| ug4180            | 773                         |                                                                                                                                                                                  |                                                                                           |                                        |                                                                   |
| ug4181            | 255                         |                                                                                                                                                                                  |                                                                                           |                                        |                                                                   |
| ug4182            | 696                         | GO:0005622,GO:000677,GO:0016043,GO:0009987,GO:0009536,GO:0003676,GO:0005737,GO:0005622                                                                                           | cellular component organization,cellular process                                          | intracellular,plastid,nucleus          | DNA binding                                                       |
| ug4183            | 428                         |                                                                                                                                                                                  |                                                                                           | cytoplasm,intracellular                | nucleic acid binding                                              |
| ug4184            | 915                         |                                                                                                                                                                                  |                                                                                           |                                        |                                                                   |
| ug4185            | 310                         |                                                                                                                                                                                  |                                                                                           |                                        |                                                                   |
| ug4186            | 111                         |                                                                                                                                                                                  |                                                                                           |                                        |                                                                   |
| ug4187            | 525                         |                                                                                                                                                                                  |                                                                                           |                                        |                                                                   |
| ug4188            | 882                         | GO:0003723                                                                                                                                                                       |                                                                                           |                                        | RNA binding                                                       |
| ug4189            | 876                         | GO:0006464,GO:0000166,GO:0016301                                                                                                                                                 | protein modification process                                                              |                                        | nucleotide binding,kinase activity                                |
| ug4190            | 612                         | GO:0040029,GO:000259,GO:0003677,GO:0003677,GO:0030                                                                                                                               | regulation of gene expression, epigenetic,DNA metabolic process                           |                                        | DNA binding                                                       |
| ug4191            | 715                         | 528,GO:0005654,GO:0003700,GO:0006350,GO:0009058,GO:000987,GO:0006629,GO:000003,GO:0008289,GO:0005737,GO:0006464,GO:0005515,GO:0019538,GO:0009056,GO:0009987,GO:000563            | transcription                                                                             | nucleoplasm                            | DNA binding,transcription regulator activity,transcription factor |
| ug4192            | 324                         |                                                                                                                                                                                  | biosynthetic process,cellular process,lipid metabolic process,reproduction                |                                        | lipid binding                                                     |
| ug4193            | 805                         |                                                                                                                                                                                  | protein modification process,protein metabolic process,catabolic process,cellular process | cytoplasm,nucleus                      | protein binding                                                   |
| ug4194            | 744                         |                                                                                                                                                                                  |                                                                                           |                                        |                                                                   |
| ug4195            | 828                         |                                                                                                                                                                                  |                                                                                           |                                        |                                                                   |
| ug4196            | 862                         | GO:0005634,GO:0003676,GO:0005737,GO:0005739                                                                                                                                      |                                                                                           | nucleus                                | DNA binding                                                       |
| ug4197            | 631                         |                                                                                                                                                                                  |                                                                                           |                                        |                                                                   |
| ug4198            | 564                         |                                                                                                                                                                                  |                                                                                           |                                        |                                                                   |
| ug4199            | 605                         |                                                                                                                                                                                  |                                                                                           |                                        |                                                                   |
| ug4200            | 654                         | GO:0005840,GO:000198,GO:0006412,GO:0005515,GO:0006810,GO:0016787,GO:0009987,GO:0016020,GO:0009536,GO:000578,GO:0019538,GO:000987,GO:0005634,GO:000622                            | translation                                                                               | ribosome                               | structural molecule activity                                      |
| ug4201            | 792                         |                                                                                                                                                                                  | transport,cellular process                                                                | membrane,plastid,endoplasmic reticulum | protein binding,hydrolase activity,nucleotide binding             |
| ug4202            | 879                         | 056,GO:0030234,GO:0005622,GO:0005634,GO:0005515,GO:0006412,GO:0005515,GO:0006810,GO:0016787,GO:0009987,GO:0016020,GO:0009536,GO:000578,GO:0019538,GO:000987,GO:0005634,GO:000622 | protein metabolic process,catabolic process                                               | intracellular,nucleus,cytosol          | enzyme regulator activity                                         |
| ug4203            | 309                         |                                                                                                                                                                                  |                                                                                           |                                        |                                                                   |
| ug4204            | 104                         |                                                                                                                                                                                  |                                                                                           |                                        |                                                                   |
| ug4205            | 402                         |                                                                                                                                                                                  |                                                                                           |                                        |                                                                   |
| ug4206            | 386                         |                                                                                                                                                                                  |                                                                                           |                                        |                                                                   |
| ug4207            | 814                         |                                                                                                                                                                                  |                                                                                           |                                        |                                                                   |
| ug4208            | 739                         |                                                                                                                                                                                  |                                                                                           |                                        |                                                                   |
| ug4209            | 883                         | GO:0006629,GO:000576,GO:0016787                                                                                                                                                  | lipid metabolic process                                                                   | extracellular region                   | hydrolase activity                                                |
| ug4210            | 218                         |                                                                                                                                                                                  |                                                                                           |                                        |                                                                   |

| Unigene ID | sequence length (bp) | GO-ID                                                                                                                    | Biological process                                                                                                                                                        | Cellular component                       | Molecular function                                         |
|------------|----------------------|--------------------------------------------------------------------------------------------------------------------------|---------------------------------------------------------------------------------------------------------------------------------------------------------------------------|------------------------------------------|------------------------------------------------------------|
| ug4211     | 476                  | GO:0005623                                                                                                               |                                                                                                                                                                           | cell                                     |                                                            |
| ug4212     | 487                  |                                                                                                                          |                                                                                                                                                                           |                                          |                                                            |
| ug4213     | 129                  |                                                                                                                          |                                                                                                                                                                           |                                          |                                                            |
| ug4214     | 171                  |                                                                                                                          |                                                                                                                                                                           |                                          |                                                            |
| ug4215     | 313                  |                                                                                                                          |                                                                                                                                                                           |                                          |                                                            |
| ug4216     | 450                  | GO:0016020,GO:0009                                                                                                       |                                                                                                                                                                           |                                          |                                                            |
| ug4217     | 351                  | 579,GO:0009536,GO:005488,GO:0015979                                                                                      | photosynthesis                                                                                                                                                            | membrane,thylakoid,plastid               | binding                                                    |
| ug4218     | 526                  | GO:0003723,GO:0016740,GO:0006259,GO:0692                                                                                 | DNA metabolic process, biosynthetic process                                                                                                                               |                                          | RNA binding,transferase activity                           |
| ug4219     | 692                  |                                                                                                                          |                                                                                                                                                                           |                                          |                                                            |
| ug4220     | 413                  |                                                                                                                          |                                                                                                                                                                           |                                          |                                                            |
| ug4221     | 818                  |                                                                                                                          |                                                                                                                                                                           |                                          |                                                            |
| ug4222     | 353                  |                                                                                                                          |                                                                                                                                                                           |                                          |                                                            |
| ug4223     | 550                  | GO:0016020                                                                                                               |                                                                                                                                                                           | membrane                                 |                                                            |
| ug4224     | 927                  | GO:0016043,GO:0009987,GO:0016020,GO:0005623,GO:0006950,GO:0009058,GO:0006519,GO:0019748                                  | cellular component organization,cellular process response to stress,biosynthetic process,cellular amino acid and derivative metabolic process,secondary metabolic process | membrane                                 | protein binding                                            |
| ug4225     | 426                  | 950,GO:0009058,GO:0006519,GO:0019748                                                                                     |                                                                                                                                                                           | cell                                     |                                                            |
| ug4226     | 348                  |                                                                                                                          |                                                                                                                                                                           |                                          |                                                            |
| ug4227     | 562                  |                                                                                                                          |                                                                                                                                                                           |                                          |                                                            |
| ug4228     | 814                  | GO:0009536                                                                                                               |                                                                                                                                                                           | plastid                                  |                                                            |
| ug4229     | 349                  | GO:0003723                                                                                                               |                                                                                                                                                                           |                                          | RNA binding                                                |
| ug4230     | 739                  |                                                                                                                          |                                                                                                                                                                           |                                          |                                                            |
| ug4231     | 799                  |                                                                                                                          |                                                                                                                                                                           |                                          |                                                            |
| ug4232     | 774                  | GO:0016020,GO:0005737,GO:0009987,GO:0009987,GO:0009987                                                                   | cellular process                                                                                                                                                          | membrane,cytoplasm                       | transferase activity                                       |
| ug4233     | 677                  | GO:0016020,GO:0009536,GO:0016043,GO:0005488,GO:0016740,GO:0009058,GO:0006519,GO:0000166                                  | cellular component organization,cellular process biosynthetic process,cellular amino acid and derivative metabolic process                                                | membrane,plastid                         |                                                            |
| ug4234     | 753                  |                                                                                                                          |                                                                                                                                                                           |                                          | binding,transferase activity,nucleotide binding            |
| ug4235     | 496                  |                                                                                                                          |                                                                                                                                                                           |                                          |                                                            |
| ug4236     | 363                  |                                                                                                                          |                                                                                                                                                                           |                                          |                                                            |
| ug4237     | 572                  |                                                                                                                          |                                                                                                                                                                           |                                          |                                                            |
| ug4238     | 294                  |                                                                                                                          |                                                                                                                                                                           |                                          |                                                            |
| ug4239     | 565                  | GO:0003824,GO:0009058,GO:0006629,GO:0003674,GO:0016740                                                                   | biosynthetic process,lipid metabolic process                                                                                                                              |                                          | catalytic activity,molecular_function,transferase activity |
| ug4240     | 200                  |                                                                                                                          |                                                                                                                                                                           |                                          |                                                            |
| ug4241     | 906                  | GO:0016787,GO:0009536,GO:0005739,GO:0019538,GO:0009056,GO:0016020,GO:0009570,GO:0005515,GO:0006464,GO:0000166,GO:0009536 | protein metabolic process,catabolic process                                                                                                                               | plastid,mitochondrion,membrane,thylakoid | hydrolase activity                                         |
| ug4242     | 871                  | GO:0005515,GO:0006464,GO:0000166,GO:0009536                                                                              | protein modification process                                                                                                                                              |                                          | protein binding,nucleotide binding,kinase activity         |
| ug4243     | 902                  |                                                                                                                          |                                                                                                                                                                           |                                          |                                                            |
| ug4244     | 477                  | GO:0009536                                                                                                               |                                                                                                                                                                           | plastid                                  |                                                            |
| ug4245     | 215                  |                                                                                                                          |                                                                                                                                                                           |                                          |                                                            |
| ug4246     | 855                  | GO:0009536                                                                                                               |                                                                                                                                                                           | plastid                                  |                                                            |
| ug4247     | 834                  | GO:0019538,GO:0009987,GO:0005737,GO:0005515,GO:0000166                                                                   | protein metabolic process,cellular process                                                                                                                                | cytoplasm                                | protein binding,nucleotide binding                         |
| ug4248     | 177                  |                                                                                                                          |                                                                                                                                                                           |                                          |                                                            |
| ug4249     | 882                  | GO:0005576,GO:0005757                                                                                                    |                                                                                                                                                                           | extracellular region,cytoplasm           |                                                            |
| ug4250     | 757                  |                                                                                                                          |                                                                                                                                                                           |                                          |                                                            |
| ug4251     | 834                  |                                                                                                                          |                                                                                                                                                                           |                                          |                                                            |
| ug4252     | 238                  | GO:0016740,GO:0006350,GO:0003677,GO:0009536                                                                              | transcription                                                                                                                                                             | plastid                                  | transferase activity,DNA binding                           |
| ug4253     | 104                  |                                                                                                                          |                                                                                                                                                                           |                                          |                                                            |
| ug4254     | 124                  |                                                                                                                          |                                                                                                                                                                           |                                          |                                                            |
| ug4255     | 123                  |                                                                                                                          |                                                                                                                                                                           |                                          |                                                            |
| ug4256     | 878                  | GO:0016020,GO:0006810,GO:0005215,GO:0009536                                                                              | transport                                                                                                                                                                 | membrane,plasma membrane                 | transporter activity                                       |
| ug4257     | 875                  |                                                                                                                          |                                                                                                                                                                           |                                          |                                                            |
| ug4258     | 194                  |                                                                                                                          |                                                                                                                                                                           |                                          |                                                            |
| ug4259     | 831                  | GO:0016787,GO:0016740,GO:0009579,GO:0009536,GO:0016020                                                                   |                                                                                                                                                                           | membrane                                 | hydrolase activity                                         |
| ug4260     | 301                  |                                                                                                                          |                                                                                                                                                                           | thylakoid,plastid,membrane               |                                                            |
| ug4261     | 842                  | GO:0003676,GO:0000166,GO:0005622                                                                                         |                                                                                                                                                                           | intracellular                            | nucleic acid binding,nucleotide binding                    |
| ug4262     | 271                  |                                                                                                                          |                                                                                                                                                                           |                                          |                                                            |
| ug4263     | 790                  | GO:0005623,GO:0005786,GO:0007275,GO:0005698,GO:0005488,GO:0005433                                                        | multicellular organismal                                                                                                                                                  | cell,cytoplasm                           | binding                                                    |
| ug4264     | 786                  |                                                                                                                          |                                                                                                                                                                           |                                          | binding,protein binding                                    |
| ug4265     | 698                  |                                                                                                                          |                                                                                                                                                                           |                                          |                                                            |
| ug4266     | 433                  |                                                                                                                          |                                                                                                                                                                           |                                          |                                                            |
| ug4267     | 138                  |                                                                                                                          |                                                                                                                                                                           |                                          |                                                            |

| Unigene ID | sequence length (bp) | GO-ID                                                                                                                              | Biological process                                                                                       | Cellular component         | Molecular function                                           |
|------------|----------------------|------------------------------------------------------------------------------------------------------------------------------------|----------------------------------------------------------------------------------------------------------|----------------------------|--------------------------------------------------------------|
| ug4268     | 113                  |                                                                                                                                    |                                                                                                          |                            |                                                              |
| ug4269     | 156                  |                                                                                                                                    |                                                                                                          |                            |                                                              |
| ug4270     | 199                  |                                                                                                                                    |                                                                                                          |                            |                                                              |
| ug4271     | 226                  |                                                                                                                                    |                                                                                                          |                            |                                                              |
| ug4272     | 540                  |                                                                                                                                    |                                                                                                          |                            |                                                              |
| ug4273     | 548                  | GO:0016020,GO:0009536,GO:0009579,GO:00009                                                                                          |                                                                                                          | membrane,plastid,thylakoid | protein binding                                              |
| ug4274     | 283                  |                                                                                                                                    |                                                                                                          |                            |                                                              |
| ug4275     | 610                  | GO:0016740                                                                                                                         |                                                                                                          |                            | transferase activity                                         |
| ug4276     | 104                  |                                                                                                                                    |                                                                                                          |                            |                                                              |
| ug4277     | 375                  |                                                                                                                                    |                                                                                                          |                            |                                                              |
| ug4278     | 239                  |                                                                                                                                    |                                                                                                          |                            |                                                              |
| ug4279     | 198                  | GO:0005886                                                                                                                         |                                                                                                          | plasma membrane            |                                                              |
| ug4280     | 546                  |                                                                                                                                    |                                                                                                          |                            |                                                              |
| ug4281     | 937                  | GO:0005488,GO:0003824,GO:0009058,GO:00009                                                                                          | biosynthetic process                                                                                     |                            | binding,catalytic activity,transferase activity              |
| ug4282     | 248                  |                                                                                                                                    |                                                                                                          |                            |                                                              |
| ug4283     | 325                  |                                                                                                                                    |                                                                                                          |                            |                                                              |
| ug4284     | 848                  |                                                                                                                                    |                                                                                                          |                            |                                                              |
| ug4285     | 882                  |                                                                                                                                    |                                                                                                          |                            |                                                              |
| ug4286     | 460                  |                                                                                                                                    |                                                                                                          |                            |                                                              |
| ug4287     | 605                  | GO:0003677,GO:0005737,GO:0006810,GO:0009987,GO:0006259,GO:00009                                                                    | transport,cellular process,DNA metabolic process                                                         | cytoplasm                  | DNA binding,RNA binding                                      |
| ug4288     | 159                  |                                                                                                                                    |                                                                                                          |                            |                                                              |
| ug4289     | 883                  | GO:0003674,GO:0005488,GO:0006810,GO:0006464,GO:0016020,GO:0009536,GO:0009579,GO:0009058,GO:0006810,GO:0016020,GO:0005215           | transport,protein modification process,photosynthesis,generation of precursor metabolites and energy     | membrane,plastid,thylakoid | molecular_function,binding                                   |
| ug4290     | 379                  | GO:0006810,GO:0016020,GO:0005215                                                                                                   | transport                                                                                                | membrane                   | transporter activity                                         |
| ug4291     | 766                  | GO:0008152,GO:0016020,GO:0005634                                                                                                   | metabolic process                                                                                        |                            | transferase activity                                         |
| ug4292     | 885                  | GO:0005634                                                                                                                         |                                                                                                          | nucleus                    |                                                              |
| ug4293     | 700                  | GO:0005488,GO:0003824                                                                                                              |                                                                                                          |                            | binding,nucleic acid binding                                 |
| ug4294     | 734                  |                                                                                                                                    |                                                                                                          |                            |                                                              |
| ug4295     | 225                  |                                                                                                                                    |                                                                                                          |                            |                                                              |
| ug4296     | 391                  | GO:0009058,GO:0009987,GO:0003824,GO:0005488,GO:0009536                                                                             | biosynthetic process,cellular process                                                                    | plastid                    | catalytic activity,binding                                   |
| ug4297     | 240                  | GO:0016740                                                                                                                         |                                                                                                          |                            | transferase activity                                         |
| ug4298     | 936                  | GO:0005737                                                                                                                         |                                                                                                          | cytoplasm                  |                                                              |
| ug4299     | 322                  |                                                                                                                                    |                                                                                                          |                            |                                                              |
| ug4300     | 454                  |                                                                                                                                    |                                                                                                          |                            |                                                              |
| ug4301     | 808                  | GO:0000166,GO:0005515,GO:0006810,GO:0009987,GO:0007165,GO:0005634,GO:001678                                                        | transport,cellular process,signal transduction                                                           | nucleus                    | nucleotide binding,protein binding,hydrolase activity        |
| ug4302     | 575                  |                                                                                                                                    |                                                                                                          |                            |                                                              |
| ug4303     | 344                  |                                                                                                                                    |                                                                                                          |                            |                                                              |
| ug4304     | 390                  |                                                                                                                                    |                                                                                                          |                            |                                                              |
| ug4305     | 368                  |                                                                                                                                    |                                                                                                          |                            |                                                              |
| ug4306     | 838                  | GO:0016020,GO:0009536,GO:0009579,GO:00019538,GO:0009987,GO:0005515,GO:0000003,GO:0009791,GO:0009790,GO:0030234,GO:0000166,GO:00009 | protein metabolic process,cellular process,reproduction,post-embryonic development,embryonic development | membrane,plastid,thylakoid | protein binding                                              |
| ug4307     | 687                  | 000003,GO:0009791,GO:0009790,GO:0030234,GO:0000166,GO:00009                                                                        | protein metabolic process,cellular process,reproduction,post-embryonic development,embryonic development | plastid,thylakoid          | protein binding,enzyme regulator activity,nucleotide binding |
| ug4308     | 742                  |                                                                                                                                    |                                                                                                          |                            |                                                              |
| ug4309     | 577                  |                                                                                                                                    |                                                                                                          |                            |                                                              |
| ug4310     | 425                  |                                                                                                                                    |                                                                                                          |                            |                                                              |
| ug4311     | 891                  |                                                                                                                                    |                                                                                                          |                            |                                                              |
| ug4312     | 527                  |                                                                                                                                    |                                                                                                          |                            |                                                              |
| ug4313     | 404                  |                                                                                                                                    |                                                                                                          |                            |                                                              |
| ug4314     | 351                  | GO:0005515                                                                                                                         |                                                                                                          |                            | protein binding                                              |
| ug4315     | 152                  |                                                                                                                                    |                                                                                                          |                            |                                                              |
| ug4316     | 161                  |                                                                                                                                    |                                                                                                          |                            |                                                              |
| ug4317     | 170                  |                                                                                                                                    |                                                                                                          |                            |                                                              |
| ug4318     | 853                  |                                                                                                                                    |                                                                                                          |                            |                                                              |
| ug4319     | 367                  |                                                                                                                                    |                                                                                                          |                            |                                                              |
| ug4320     | 107                  |                                                                                                                                    |                                                                                                          |                            |                                                              |
| ug4321     | 101                  |                                                                                                                                    |                                                                                                          |                            |                                                              |
| ug4322     | 795                  | GO:0005840,GO:0005198,GO:0006412                                                                                                   | translation                                                                                              | ribosome                   | structural molecule activity                                 |
| ug4323     | 751                  |                                                                                                                                    |                                                                                                          |                            |                                                              |
| ug4324     | 745                  | GO:0016020,GO:0006139,GO:0019748,GO:0016787                                                                                        | nucleobase, nucleoside, nucleotide and nucleic acid metabolic process,secondary metabolic                | membrane                   | hydrolase activity                                           |
| ug4325     | 157                  |                                                                                                                                    |                                                                                                          |                            |                                                              |

| Unigene ID | sequence length (bp) | GO-ID                                                                                                                                                                          | Biological process                                                                                                                                  | Cellular component                                   | Molecular function                        |
|------------|----------------------|--------------------------------------------------------------------------------------------------------------------------------------------------------------------------------|-----------------------------------------------------------------------------------------------------------------------------------------------------|------------------------------------------------------|-------------------------------------------|
| ug4326     | 914                  | GO:0003824                                                                                                                                                                     |                                                                                                                                                     |                                                      | catalytic activity                        |
| ug4327     | 177                  | GO:0016740,GO:0006259,GO:0009058,GO:0003723,GO:0009628,GO:0009058,GO:000987,GO:0016020,GO:0005739,GO:0005886,GO:0006810,GO:0009058,GO:0006091,GO:0006139,GO:0016020,GO:0005215 | DNA metabolic process,biosynthetic process,response to abiotic process                                                                              |                                                      | transferase activity,RNA binding,binding  |
| ug4328     | 102                  |                                                                                                                                                                                |                                                                                                                                                     |                                                      |                                           |
| ug4329     | 710                  | GO:0009058,GO:000987,GO:0016020,GO:0005739,GO:0005886,GO:0006810,GO:0009058,GO:0006091,GO:0006139,GO:0016020,GO:0005215                                                        | biosynthetic process,cellular process                                                                                                               | membrane,mitochondrion,plasma membrane,intracellular |                                           |
| ug4330     | 208                  |                                                                                                                                                                                |                                                                                                                                                     |                                                      |                                           |
| ug4331     | 254                  |                                                                                                                                                                                |                                                                                                                                                     |                                                      |                                           |
| ug4332     | 582                  |                                                                                                                                                                                |                                                                                                                                                     |                                                      |                                           |
| ug4333     | 248                  |                                                                                                                                                                                |                                                                                                                                                     |                                                      |                                           |
| ug4334     | 419                  |                                                                                                                                                                                |                                                                                                                                                     |                                                      |                                           |
| ug4335     | 312                  | GO:0016787                                                                                                                                                                     |                                                                                                                                                     |                                                      | hydrolase activity                        |
| ug4336     | 409                  | GO:0005623                                                                                                                                                                     |                                                                                                                                                     | cell                                                 |                                           |
| ug4337     | 703                  | GO:0003824                                                                                                                                                                     |                                                                                                                                                     |                                                      | catalytic activity                        |
| ug4338     | 500                  |                                                                                                                                                                                |                                                                                                                                                     |                                                      |                                           |
| ug4339     | 345                  |                                                                                                                                                                                |                                                                                                                                                     |                                                      |                                           |
| ug4340     | 540                  |                                                                                                                                                                                |                                                                                                                                                     |                                                      |                                           |
| ug4341     | 626                  | GO:0006810,GO:0009058,GO:0006091,GO:0006139,GO:0016020,GO:0005215                                                                                                              | transport,biosynthetic process,generation of precursor metabolites and energy,nucleobase, nucleoside, nucleotide and nucleic acid metabolic process | membrane                                             | transporter activity                      |
| ug4342     | 743                  |                                                                                                                                                                                |                                                                                                                                                     |                                                      |                                           |
| ug4343     | 282                  |                                                                                                                                                                                |                                                                                                                                                     |                                                      |                                           |
| ug4344     | 874                  | GO:0003723,GO:0004518,GO:0009536,GO:0005975,GO:000987,GO:0016787,GO:0005576,GO:0005618,GO:0005777,GO:0005739,GO:0005515,GO:0016043,GO:0009987                                  | nucleobase, nucleoside, nucleotide and nucleic acid metabolic process                                                                               | plastid                                              | RNA binding,nuclease activity             |
| ug4345     | 230                  |                                                                                                                                                                                |                                                                                                                                                     |                                                      |                                           |
| ug4346     | 212                  |                                                                                                                                                                                |                                                                                                                                                     |                                                      |                                           |
| ug4347     | 819                  | GO:0005975,GO:000987,GO:0016787,GO:0005576,GO:0005618,GO:0005777,GO:0005739,GO:0005515,GO:0016043,GO:0009987                                                                   | carbohydrate metabolic process,cellular process                                                                                                     | extracellular region,cell wall                       | hydrolase activity,transferase activity   |
| ug4348     | 173                  |                                                                                                                                                                                |                                                                                                                                                     |                                                      |                                           |
| ug4349     | 297                  |                                                                                                                                                                                |                                                                                                                                                     |                                                      |                                           |
| ug4350     | 116                  |                                                                                                                                                                                |                                                                                                                                                     |                                                      |                                           |
| ug4351     | 222                  |                                                                                                                                                                                |                                                                                                                                                     |                                                      |                                           |
| ug4352     | 778                  | GO:0005488,GO:0005318,GO:0005716,GO:0005759,GO:0005181,GO:0005333,GO:0005115,GO:0005334,GO:0005321                                                                             |                                                                                                                                                     |                                                      | binding,protein binding                   |
| ug4353     | 318                  |                                                                                                                                                                                |                                                                                                                                                     |                                                      |                                           |
| ug4354     | 716                  |                                                                                                                                                                                |                                                                                                                                                     |                                                      |                                           |
| ug4355     | 759                  |                                                                                                                                                                                |                                                                                                                                                     |                                                      |                                           |
| ug4356     | 181                  |                                                                                                                                                                                |                                                                                                                                                     |                                                      |                                           |
| ug4357     | 333                  |                                                                                                                                                                                |                                                                                                                                                     |                                                      |                                           |
| ug4358     | 115                  |                                                                                                                                                                                |                                                                                                                                                     |                                                      |                                           |
| ug4359     | 334                  |                                                                                                                                                                                |                                                                                                                                                     |                                                      |                                           |
| ug4360     | 321                  |                                                                                                                                                                                |                                                                                                                                                     |                                                      |                                           |
| ug4361     | 412                  | GO:0005777,GO:0005739,GO:0005515,GO:0016043,GO:0009987                                                                                                                         | cellular component organization,cellular process                                                                                                    | peroxisome,mitochondrion                             | protein binding                           |
| ug4362     | 252                  |                                                                                                                                                                                |                                                                                                                                                     |                                                      |                                           |
| ug4363     | 122                  |                                                                                                                                                                                |                                                                                                                                                     |                                                      |                                           |
| ug4364     | 336                  |                                                                                                                                                                                |                                                                                                                                                     |                                                      |                                           |
| ug4365     | 595                  | GO:0016787,GO:0006950,GO:0006259                                                                                                                                               | response to stress,DNA metabolic process                                                                                                            |                                                      | hydrolase activity                        |
| ug4366     | 424                  |                                                                                                                                                                                |                                                                                                                                                     |                                                      |                                           |
| ug4367     | 552                  |                                                                                                                                                                                |                                                                                                                                                     |                                                      |                                           |
| ug4368     | 441                  | GO:0005886                                                                                                                                                                     |                                                                                                                                                     | plasma membrane                                      |                                           |
| ug4369     | 730                  | GO:0016740,GO:0006950,GO:0009628,GO:0005794,GO:0009058,GO:0005975,GO:0009987,GO:0016020,GO:0006139,GO:0009058,GO:0006519,GO:000166,GO:0003824                                  | response to stress,response to abiotic stimulus,biosynthetic process,carbohydrate metabolic process,cellular process                                | Golgi apparatus,membrane,endoplasmic reticulum       | transferase activity                      |
| ug4370     | 498                  | GO:0006139,GO:0009058,GO:0006519,GO:000166,GO:0003824                                                                                                                          | nucleobase, nucleoside, nucleotide and nucleic acid metabolic process,biosynthetic process,cellular amino acid and derivative metabolic process     |                                                      | nucleotide binding,catalytic activity     |
| ug4371     | 698                  | GO:0006139,GO:0009058,GO:00019748,GO:0009536,GO:0016787                                                                                                                        | nucleobase, nucleoside, nucleotide and nucleic acid metabolic process,carbohydrate metabolic process,catabolic process,secondary metabolic process  | plastid                                              | hydrolase activity                        |
| ug4372     | 722                  | GO:0008289,GO:0005423                                                                                                                                                          |                                                                                                                                                     | plasma membrane                                      | lipid binding                             |
| ug4373     | 423                  |                                                                                                                                                                                |                                                                                                                                                     |                                                      |                                           |
| ug4374     | 160                  |                                                                                                                                                                                |                                                                                                                                                     |                                                      |                                           |
| ug4375     | 244                  |                                                                                                                                                                                |                                                                                                                                                     |                                                      |                                           |
| ug4376     | 800                  | GO:0000166                                                                                                                                                                     |                                                                                                                                                     |                                                      | nucleotide binding                        |
| ug4377     | 705                  | GO:0005975,GO:000987,GO:0006629,GO:0030246,GO:0016740                                                                                                                          | carbohydrate metabolic process,cellular process,lipid metabolic process                                                                             |                                                      | carbohydrate binding,transferase activity |

| Unigene ID | sequence length (bp) | GO-ID                                                                                                                                          | Biological process                                                                                                                                                                                                                                            | Cellular component                        | Molecular function                                               |
|------------|----------------------|------------------------------------------------------------------------------------------------------------------------------------------------|---------------------------------------------------------------------------------------------------------------------------------------------------------------------------------------------------------------------------------------------------------------|-------------------------------------------|------------------------------------------------------------------|
| ug4378     | 358                  |                                                                                                                                                |                                                                                                                                                                                                                                                               |                                           |                                                                  |
| ug4379     | 795                  |                                                                                                                                                |                                                                                                                                                                                                                                                               |                                           |                                                                  |
| ug4380     | 676                  |                                                                                                                                                |                                                                                                                                                                                                                                                               |                                           |                                                                  |
| ug4381     | 594                  |                                                                                                                                                |                                                                                                                                                                                                                                                               |                                           |                                                                  |
| ug4382     | 559                  | GO:0007165,GO:0009719,GO:0016043,GO:0006412,GO:0005737,GO:0004872,GO:0007165,GO:0009719,GO:0009653,GO:0009908,GO:0009058,GO:0005975,GO:0016787 | signal transduction,response to endogenous stimulus,cellular component organization,translation signal transduction,response to endogenous stimulus,anatomical structure morphogenesis,flower development,biosynthetic process,carbohydrate metabolic process | cytoplasm                                 | protein binding                                                  |
| ug4383     | 610                  | GO:0005840,GO:0005198,GO:0006412                                                                                                               | translation                                                                                                                                                                                                                                                   | ribosome                                  | receptor activity,hydrolase activity                             |
| ug4384     | 415                  |                                                                                                                                                |                                                                                                                                                                                                                                                               |                                           | structural molecule activity                                     |
| ug4385     | 234                  |                                                                                                                                                |                                                                                                                                                                                                                                                               |                                           |                                                                  |
| ug4386     | 759                  | GO:0005737,GO:000856,GO:0016043,GO:0009987,GO:0005623,GO:0005515,GO:000562GO:0005515,GO:000562                                                 | cellular component organization,cellular process                                                                                                                                                                                                              | cytoplasm,cytoskeleton,cell,intracellular | protein binding                                                  |
| ug4387     | 776                  | GO:0006464,GO:0016009056,GO:0009987                                                                                                            | protein metabolic process,catabolic process,cellular process                                                                                                                                                                                                  | intracellular                             | protein binding                                                  |
| ug4388     | 803                  | GO:0006464,GO:001301,GO:0000166,GO:00005488,GO:0000166,GO:0008152,GO:0003824,GO:0003674                                                        | protein modification process                                                                                                                                                                                                                                  | mitochondrion                             | kinase activity,nucleotide binding                               |
| ug4389     | 172                  |                                                                                                                                                |                                                                                                                                                                                                                                                               |                                           | binding,nucleotide binding,catalytic activity,molecular_function |
| ug4390     | 390                  | GO:0005488,GO:0000166,GO:0008152,GO:0003824,GO:0003674                                                                                         | metabolic process                                                                                                                                                                                                                                             |                                           |                                                                  |
| ug4391     | 169                  |                                                                                                                                                |                                                                                                                                                                                                                                                               |                                           |                                                                  |
| ug4392     | 369                  |                                                                                                                                                |                                                                                                                                                                                                                                                               |                                           |                                                                  |
| ug4393     | 423                  |                                                                                                                                                |                                                                                                                                                                                                                                                               |                                           |                                                                  |
| ug4394     | 769                  | GO:0006464,GO:001538,GO:0009056,GO:0009987,GO:0003824,GO:0000166,GO:0016005488,GO:0000166,GO:0008152,GO:0003824,GO:0003674                     | protein modification process,protein metabolic process,catabolic process,cellular                                                                                                                                                                             |                                           | catalytic activity                                               |
| ug4395     | 316                  | GO:0006464,GO:001787,GO:0003677,GO:0005488,GO:0005515                                                                                          | protein modification process,protein metabolic process,catabolic process,cellular                                                                                                                                                                             |                                           | nucleotide binding,hydrolase activity,DNA binding,protein        |
| ug4396     | 356                  |                                                                                                                                                |                                                                                                                                                                                                                                                               |                                           |                                                                  |
| ug4397     | 440                  | GO:0005840,GO:0005198,GO:0006412                                                                                                               | translation                                                                                                                                                                                                                                                   | ribosome                                  | structural molecule activity                                     |
| ug4398     | 192                  |                                                                                                                                                |                                                                                                                                                                                                                                                               |                                           |                                                                  |
| ug4399     | 233                  |                                                                                                                                                |                                                                                                                                                                                                                                                               |                                           |                                                                  |
| ug4400     | 201                  |                                                                                                                                                |                                                                                                                                                                                                                                                               |                                           |                                                                  |
| ug4401     | 342                  |                                                                                                                                                |                                                                                                                                                                                                                                                               |                                           |                                                                  |
| ug4402     | 802                  |                                                                                                                                                |                                                                                                                                                                                                                                                               |                                           |                                                                  |
| ug4403     | 486                  |                                                                                                                                                |                                                                                                                                                                                                                                                               |                                           |                                                                  |
| ug4404     | 223                  |                                                                                                                                                |                                                                                                                                                                                                                                                               |                                           |                                                                  |
| ug4405     | 261                  |                                                                                                                                                |                                                                                                                                                                                                                                                               |                                           |                                                                  |
| ug4406     | 741                  | GO:0005515,GO:000810,GO:0009987,GO:0005488,GO:0005739                                                                                          | transport,cellular process                                                                                                                                                                                                                                    | mitochondrion                             | protein binding,protein binding                                  |
| ug4407     | 141                  |                                                                                                                                                |                                                                                                                                                                                                                                                               |                                           |                                                                  |
| ug4408     | 843                  | GO:0005622,GO:0000166,GO:0007165                                                                                                               | signal transduction                                                                                                                                                                                                                                           | intracellular                             | nucleotide binding                                               |
| ug4409     | 557                  |                                                                                                                                                |                                                                                                                                                                                                                                                               |                                           |                                                                  |
| ug4410     | 314                  |                                                                                                                                                |                                                                                                                                                                                                                                                               |                                           |                                                                  |
| ug4411     | 387                  |                                                                                                                                                |                                                                                                                                                                                                                                                               |                                           |                                                                  |
| ug4412     | 142                  | GO:0005215,GO:0016020,GO:0005739,GO:0006810,GO:0009058,GO:0006091,GO:0006139,GO:0016787                                                        | transport,biosynthetic process,generation of precursor metabolites and energy,nucleobase, nucleoside, nucleotide and nucleic acid metabolic process                                                                                                           | membrane,mitochondrion                    | transporter activity,hydrolase activity                          |
| ug4413     | 497                  |                                                                                                                                                |                                                                                                                                                                                                                                                               |                                           |                                                                  |
| ug4414     | 607                  | GO:0016787                                                                                                                                     |                                                                                                                                                                                                                                                               |                                           | hydrolase activity                                               |
| ug4415     | 648                  |                                                                                                                                                |                                                                                                                                                                                                                                                               |                                           |                                                                  |
| ug4416     | 166                  |                                                                                                                                                |                                                                                                                                                                                                                                                               |                                           |                                                                  |
| ug4417     | 452                  |                                                                                                                                                |                                                                                                                                                                                                                                                               |                                           |                                                                  |
| ug4418     | 413                  | GO:0005840,GO:0005198,GO:0006412                                                                                                               | translation                                                                                                                                                                                                                                                   | ribosome                                  | structural molecule activity                                     |
| ug4419     | 296                  | GO:0000003,GO:0009791,GO:0006464,GO:0016787,GO:0019538,GO:0009056,GO:0005634,GO:0006950,GO:000019725,GO:0003824,GO:0008152                     | reproduction,post-embryonic development,protein metabolic process,protein metabolic process,catabolic process,response to stress,response to abiotic cellular homeostasis,metabolic process                                                                   | nucleus                                   | hydrolase activity                                               |
| ug4420     | 375                  |                                                                                                                                                |                                                                                                                                                                                                                                                               |                                           |                                                                  |
| ug4421     | 707                  | GO:0019725,GO:0003824,GO:0008152                                                                                                               | cellular homeostasis,metabolic process                                                                                                                                                                                                                        |                                           | catalytic activity                                               |
| ug4422     | 851                  | GO:0003676,GO:0000166                                                                                                                          |                                                                                                                                                                                                                                                               |                                           | nucleic acid binding,nucleotide binding                          |



| Unigene ID | sequence length (bp) | GO-ID                                                                                     | Biological process                                                    | Cellular component                             | Molecular function                                                                                    |
|------------|----------------------|-------------------------------------------------------------------------------------------|-----------------------------------------------------------------------|------------------------------------------------|-------------------------------------------------------------------------------------------------------|
| ug4423     | 246                  |                                                                                           |                                                                       |                                                |                                                                                                       |
| ug4424     | 715                  | GO:0005840,GO:0005198,GO:0006412                                                          | translation                                                           | ribosome                                       | structural molecule activity                                                                          |
| ug4425     | 271                  | GO:0016787,GO:0005215,GO:0005886,GO:0006810,GO:0000166,G                                  | transport                                                             | plasma membrane,membrane                       | hydrolase activity,transporter activity,nucleotide binding                                            |
| ug4426     | 570                  |                                                                                           |                                                                       |                                                |                                                                                                       |
| ug4427     | 104                  |                                                                                           |                                                                       |                                                |                                                                                                       |
| ug4428     | 147                  |                                                                                           |                                                                       |                                                |                                                                                                       |
| ug4429     | 520                  | GO:0005840,GO:0005198,GO:0006412,GO:0006350,GO:0008135,GO:0003677,GO:0030528,GO:0005515,G | translation                                                           | ribosome,mitochondrion                         | structural molecule activity                                                                          |
| ug4430     | 727                  | GO:0005634,GO:0005480                                                                     | transcription                                                         | nucleus                                        | translation factor activity,nucleic acid binding,DNA binding,transcription regulator activity,protein |
| ug4431     | 545                  |                                                                                           |                                                                       |                                                |                                                                                                       |
| ug4432     | 860                  | GO:0005622,GO:0019538,GO:0009056,GO:0009987,GO:0005634,G                                  | protein metabolic process,catabolic process,cellular process          | intracellular,nucleus,cytosol                  | hydrolase activity                                                                                    |
| ug4433     | 424                  |                                                                                           |                                                                       |                                                |                                                                                                       |
| ug4434     | 445                  |                                                                                           |                                                                       |                                                |                                                                                                       |
| ug4435     | 606                  |                                                                                           |                                                                       |                                                |                                                                                                       |
| ug4436     | 484                  | GO:0009536                                                                                |                                                                       | plastid                                        |                                                                                                       |
| ug4437     | 714                  |                                                                                           |                                                                       |                                                |                                                                                                       |
| ug4438     | 443                  | GO:0009536                                                                                |                                                                       | plastid                                        |                                                                                                       |
| ug4439     | 331                  |                                                                                           |                                                                       |                                                |                                                                                                       |
| ug4440     | 146                  |                                                                                           |                                                                       |                                                |                                                                                                       |
| ug4441     | 332                  |                                                                                           |                                                                       |                                                |                                                                                                       |
| ug4442     | 697                  |                                                                                           |                                                                       |                                                |                                                                                                       |
| ug4443     | 843                  | GO:0009058,GO:000987,GO:0006629,GO:0003824,GO:0016740,G                                   | biosynthetic process,cellular process,lipid metabolic process         | membrane,endoplasmic reticulum,plasma membrane | catalytic activity,transferase activity                                                               |
| ug4444     | 840                  | GO:0005488                                                                                |                                                                       |                                                | binding                                                                                               |
| ug4445     | 446                  | GO:0005730,GO:0006139,GO:0005634,GO:0005622,GO:0003723                                    | nucleobase, nucleoside, nucleotide and nucleic acid metabolic process | nucleolus,nucleus,intracellular                | RNA binding                                                                                           |
| ug4446     | 117                  |                                                                                           |                                                                       |                                                |                                                                                                       |
| ug4447     | 738                  |                                                                                           |                                                                       |                                                |                                                                                                       |
| ug4448     | 379                  |                                                                                           |                                                                       |                                                |                                                                                                       |
| ug4449     | 388                  |                                                                                           |                                                                       |                                                |                                                                                                       |
| ug4450     | 157                  |                                                                                           |                                                                       |                                                |                                                                                                       |
| ug4451     | 269                  |                                                                                           |                                                                       |                                                |                                                                                                       |
| ug4452     | 438                  |                                                                                           |                                                                       |                                                |                                                                                                       |
| ug4453     | 748                  | GO:0005739                                                                                |                                                                       | mitochondrion                                  |                                                                                                       |
| ug4454     | 421                  |                                                                                           |                                                                       |                                                |                                                                                                       |
| ug4455     | 594                  | GO:0005773,GO:0005886,GO:0016787,GO:0005215,GO:0006810,G                                  | transport                                                             | vacuole,plasma membrane,membrane               | hydrolase activity,transporter activity,nucleotide binding                                            |
| ug4456     | 673                  |                                                                                           |                                                                       |                                                |                                                                                                       |
| ug4457     | 483                  | GO:0005737,GO:0009628,GO:0009606,GO:0005515,GO:0005856,G                                  | response to abiotic stimulus,tropism                                  | cytoplasm,cytoskeleton,nucleus                 | protein binding                                                                                       |
| ug4458     | 164                  |                                                                                           |                                                                       |                                                |                                                                                                       |
| ug4459     | 831                  | GO:0016787,GO:0000166,GO:0005215                                                          |                                                                       |                                                | hydrolase activity,nucleotide binding,transporter activity                                            |
| ug4460     | 698                  |                                                                                           |                                                                       |                                                |                                                                                                       |
| ug4461     | 337                  |                                                                                           |                                                                       |                                                |                                                                                                       |
| ug4462     | 638                  | GO:0005856,GO:0005515,GO:0016043,GO:0000159                                               | cellular component organization,cellular process                      | cytoskeleton                                   | protein binding                                                                                       |
| ug4463     | 159                  |                                                                                           |                                                                       |                                                |                                                                                                       |
| ug4464     | 420                  |                                                                                           |                                                                       |                                                |                                                                                                       |
| ug4465     | 360                  |                                                                                           |                                                                       |                                                |                                                                                                       |
| ug4466     | 652                  | GO:0003824,GO:0005488,GO:0005515,GO:0006950,GO:0008219,G                                  | response to stress,cell death                                         | plasma membrane                                | catalytic activity,activity,protein binding                                                           |
| ug4467     | 118                  |                                                                                           |                                                                       |                                                |                                                                                                       |
| ug4468     | 119                  |                                                                                           |                                                                       |                                                |                                                                                                       |
| ug4469     | 690                  |                                                                                           |                                                                       |                                                |                                                                                                       |
| ug4470     | 347                  | GO:0003824,GO:0008135,GO:0006810,GO:000987,GO:0005215,GO:0019725,GO:0016020               | metabolic process                                                     |                                                | catalytic activity                                                                                    |
| ug4471     | 822                  | GO:0019538,GO:000987,GO:0003824,GO:0000159                                                | transport,cellular process,cellular homeostasis                       | membrane                                       | transporter activity                                                                                  |
| ug4472     | 507                  |                                                                                           |                                                                       |                                                |                                                                                                       |
| ug4473     | 171                  |                                                                                           |                                                                       |                                                |                                                                                                       |
| ug4474     | 726                  | GO:0005198,GO:0009058,GO:0009987,GO:0000159                                               | biosynthetic process,cellular process                                 |                                                | structural molecule activity,protein binding                                                          |

| Unigene ID | sequence length (bp) | GO-ID                                                                                                                                | Biological process                                                                                                                                         | Cellular component                             | Molecular function                                                                                                                           |
|------------|----------------------|--------------------------------------------------------------------------------------------------------------------------------------|------------------------------------------------------------------------------------------------------------------------------------------------------------|------------------------------------------------|----------------------------------------------------------------------------------------------------------------------------------------------|
| ug4475     | 698                  | GO:0008152,GO:0009987,GO:0016787                                                                                                     | metabolic process,cellular process                                                                                                                         |                                                | hydrolase activity                                                                                                                           |
| ug4476     | 299                  |                                                                                                                                      |                                                                                                                                                            |                                                |                                                                                                                                              |
| ug4477     | 764                  |                                                                                                                                      |                                                                                                                                                            |                                                |                                                                                                                                              |
| ug4478     | 751                  |                                                                                                                                      |                                                                                                                                                            |                                                |                                                                                                                                              |
| ug4479     | 551                  | GO:0016301,GO:0006464,GO:0005488,GO:0                                                                                                | protein modification process                                                                                                                               |                                                | kinase activity, binding, nucleotide                                                                                                         |
| ug4480     | 186                  |                                                                                                                                      |                                                                                                                                                            |                                                |                                                                                                                                              |
| ug4481     | 633                  |                                                                                                                                      |                                                                                                                                                            |                                                |                                                                                                                                              |
| ug4482     | 173                  |                                                                                                                                      |                                                                                                                                                            |                                                |                                                                                                                                              |
| ug4483     | 277                  |                                                                                                                                      |                                                                                                                                                            |                                                |                                                                                                                                              |
| ug4484     | 293                  | GO:0019538,GO:0009987,GO:0005515                                                                                                     | protein metabolic process,cellular process                                                                                                                 |                                                | protein binding                                                                                                                              |
| ug4485     | 389                  |                                                                                                                                      |                                                                                                                                                            |                                                |                                                                                                                                              |
| ug4486     | 437                  | GO:0016740,GO:0008831                                                                                                                | metabolic process                                                                                                                                          |                                                | transferase activity                                                                                                                         |
| ug4487     | 831                  |                                                                                                                                      |                                                                                                                                                            |                                                |                                                                                                                                              |
| ug4488     | 615                  | GO:0009987,GO:0005829,GO:0003824                                                                                                     | cellular process                                                                                                                                           | cytosol                                        | catalytic activity                                                                                                                           |
| ug4489     | 111                  |                                                                                                                                      |                                                                                                                                                            |                                                |                                                                                                                                              |
| ug4490     | 316                  |                                                                                                                                      |                                                                                                                                                            |                                                |                                                                                                                                              |
| ug4491     | 174                  |                                                                                                                                      |                                                                                                                                                            |                                                |                                                                                                                                              |
| ug4492     | 291                  |                                                                                                                                      |                                                                                                                                                            |                                                |                                                                                                                                              |
| ug4493     | 538                  |                                                                                                                                      |                                                                                                                                                            |                                                |                                                                                                                                              |
| ug4494     | 216                  | GO:0006259,GO:0003676,GO:0016787                                                                                                     | DNA metabolic process                                                                                                                                      |                                                | nucleic acid binding, hydrolase activity, transferase activity                                                                               |
| ug4495     | 592                  | GO:0016740                                                                                                                           |                                                                                                                                                            |                                                |                                                                                                                                              |
| ug4496     | 608                  | GO:0005634,GO:0005305,GO:0005488,GO:0005708,GO:0005622                                                                               |                                                                                                                                                            | nucleus, cytosol, intracellular, intracellular | binding                                                                                                                                      |
| ug4497     | 305                  |                                                                                                                                      |                                                                                                                                                            |                                                |                                                                                                                                              |
| ug4498     | 708                  |                                                                                                                                      |                                                                                                                                                            |                                                |                                                                                                                                              |
| ug4499     | 506                  | GO:0003824,GO:0008831                                                                                                                | metabolic process                                                                                                                                          |                                                | catalytic activity                                                                                                                           |
| ug4500     | 273                  | GO:0009987,GO:0006629,GO:0003824                                                                                                     | cellular process, lipid metabolic process                                                                                                                  |                                                | catalytic activity                                                                                                                           |
| ug4501     | 210                  |                                                                                                                                      |                                                                                                                                                            |                                                |                                                                                                                                              |
| ug4502     | 396                  | GO:0016740,GO:0008831                                                                                                                | metabolic process                                                                                                                                          |                                                | transferase activity                                                                                                                         |
| ug4503     | 187                  |                                                                                                                                      |                                                                                                                                                            |                                                |                                                                                                                                              |
| ug4504     | 602                  |                                                                                                                                      |                                                                                                                                                            |                                                |                                                                                                                                              |
| ug4505     | 192                  |                                                                                                                                      |                                                                                                                                                            |                                                |                                                                                                                                              |
| ug4506     | 677                  |                                                                                                                                      |                                                                                                                                                            |                                                |                                                                                                                                              |
| ug4507     | 636                  | GO:0005794,GO:0009987,GO:0009058,GO:0005975,GO:0016740,GO:0                                                                          | cellular process, biosynthetic process, carbohydrate metabolic process                                                                                     | Golgi apparatus, membrane                      | transferase activity                                                                                                                         |
| ug4508     | 108                  |                                                                                                                                      |                                                                                                                                                            |                                                |                                                                                                                                              |
| ug4509     | 318                  |                                                                                                                                      |                                                                                                                                                            |                                                |                                                                                                                                              |
| ug4510     | 250                  |                                                                                                                                      |                                                                                                                                                            |                                                |                                                                                                                                              |
| ug4511     | 274                  |                                                                                                                                      |                                                                                                                                                            |                                                |                                                                                                                                              |
| ug4512     | 257                  |                                                                                                                                      |                                                                                                                                                            |                                                |                                                                                                                                              |
| ug4513     | 680                  | GO:0019538,GO:0009056                                                                                                                | protein metabolic process, catabolic process                                                                                                               |                                                |                                                                                                                                              |
| ug4514     | 357                  |                                                                                                                                      |                                                                                                                                                            |                                                |                                                                                                                                              |
| ug4515     | 665                  |                                                                                                                                      |                                                                                                                                                            |                                                |                                                                                                                                              |
| ug4516     | 267                  | GO:0030528,GO:0005198,GO:0005840,GO:0006412                                                                                          | translation                                                                                                                                                | ribosome                                       | transcription regulator activity, structural molecule activity                                                                               |
| ug4517     | 148                  |                                                                                                                                      |                                                                                                                                                            |                                                |                                                                                                                                              |
| ug4518     | 242                  |                                                                                                                                      |                                                                                                                                                            |                                                |                                                                                                                                              |
| ug4519     | 305                  |                                                                                                                                      |                                                                                                                                                            |                                                |                                                                                                                                              |
| ug4520     | 159                  |                                                                                                                                      |                                                                                                                                                            |                                                |                                                                                                                                              |
| ug4521     | 555                  | GO:0006412,GO:0005515,GO:0000003,GO:0009653,GO:0016043,GO:0030154,GO:0009790,GO:0030528,GO:0045182,GO:0003700,GO:0004871,GO:0006350, | translation, reproduction, anatomical structure morphogenesis, cellular component organization, cell differentiation, embryonic development, transcription | cytoplasm, nucleus                             | protein binding, transcription regulator activity, translation regulator activity, transcription factor activity, signal transducer activity |
| ug4522     | 380                  |                                                                                                                                      |                                                                                                                                                            |                                                |                                                                                                                                              |
| ug4523     | 566                  |                                                                                                                                      |                                                                                                                                                            |                                                |                                                                                                                                              |
| ug4524     | 299                  |                                                                                                                                      |                                                                                                                                                            |                                                |                                                                                                                                              |
| ug4525     | 278                  |                                                                                                                                      |                                                                                                                                                            |                                                |                                                                                                                                              |
| ug4526     | 169                  |                                                                                                                                      |                                                                                                                                                            |                                                |                                                                                                                                              |
| ug4527     | 109                  |                                                                                                                                      |                                                                                                                                                            |                                                |                                                                                                                                              |
| ug4528     | 732                  | GO:0016740                                                                                                                           |                                                                                                                                                            |                                                | transferase activity                                                                                                                         |
| ug4529     | 297                  |                                                                                                                                      |                                                                                                                                                            |                                                |                                                                                                                                              |
| ug4530     | 618                  |                                                                                                                                      |                                                                                                                                                            |                                                |                                                                                                                                              |
| ug4531     | 142                  |                                                                                                                                      |                                                                                                                                                            |                                                |                                                                                                                                              |
| ug4532     | 325                  |                                                                                                                                      |                                                                                                                                                            |                                                |                                                                                                                                              |
| ug4533     | 145                  |                                                                                                                                      |                                                                                                                                                            |                                                |                                                                                                                                              |
| ug4534     | 148                  |                                                                                                                                      |                                                                                                                                                            |                                                |                                                                                                                                              |
| ug4535     | 859                  | GO:0008152,GO:0003824,GO:0005488                                                                                                     | metabolic process                                                                                                                                          |                                                | catalytic activity, binding                                                                                                                  |

| Unigene ID | sequence length (bp) | GO-ID                                                                                           | Biological process                                                                   | Cellular component                  | Molecular function                                                 |
|------------|----------------------|-------------------------------------------------------------------------------------------------|--------------------------------------------------------------------------------------|-------------------------------------|--------------------------------------------------------------------|
| ug4536     | 482                  | GO:0016740,GO:0005654,GO:0006350,GO:0                                                           | transcription                                                                        | nucleoplasm                         | transferase activity,nucleotide binding                            |
| ug4537     | 252                  |                                                                                                 |                                                                                      |                                     |                                                                    |
| ug4538     | 128                  |                                                                                                 |                                                                                      |                                     |                                                                    |
| ug4539     | 113                  |                                                                                                 |                                                                                      |                                     |                                                                    |
| ug4540     | 372                  |                                                                                                 |                                                                                      |                                     |                                                                    |
| ug4541     | 403                  |                                                                                                 |                                                                                      |                                     |                                                                    |
| ug4542     | 219                  |                                                                                                 |                                                                                      |                                     |                                                                    |
| ug4543     | 234                  |                                                                                                 |                                                                                      |                                     |                                                                    |
| ug4544     | 474                  | GO:0006350,GO:000908,GO:0005515,GO:0003700,GO:0007165,GO:0009719,GO:000563                      | transcription,flower development,signal transduction,response to endogenous stimulus | nucleus                             | protein binding,transcription factor activity                      |
| ug4545     | 275                  |                                                                                                 |                                                                                      |                                     |                                                                    |
| ug4546     | 247                  |                                                                                                 |                                                                                      |                                     |                                                                    |
| ug4547     | 347                  | GO:0005737,GO:0016                                                                              |                                                                                      | cytoplasm,membrane                  |                                                                    |
| ug4548     | 716                  |                                                                                                 |                                                                                      |                                     |                                                                    |
| ug4549     | 112                  |                                                                                                 |                                                                                      |                                     |                                                                    |
| ug4550     | 293                  |                                                                                                 |                                                                                      |                                     |                                                                    |
| ug4551     | 444                  | GO:0016020,GO:0005215,GO:0006810,GO:0                                                           | transport,cellular process                                                           | membrane                            | transporter activity                                               |
| ug4552     | 810                  |                                                                                                 |                                                                                      |                                     |                                                                    |
| ug4553     | 534                  | GO:0005488,GO:0003824,GO:0003674,GO:0016740                                                     |                                                                                      |                                     | binding,catalytic activity,molecular_function,transferase activity |
| ug4554     | 789                  | GO:0005488,GO:0003824,GO:0005618,GO:0005737                                                     |                                                                                      |                                     | binding,molecular_function                                         |
| ug4555     | 755                  | GO:0016787,GO:0019538,GO:0009056,G                                                              | protein metabolic process,catabolic process                                          | cell wall,cytoplasm,membrane        | hydrolase activity                                                 |
| ug4556     | 631                  |                                                                                                 |                                                                                      |                                     |                                                                    |
| ug4557     | 113                  |                                                                                                 |                                                                                      |                                     |                                                                    |
| ug4558     | 334                  | GO:0016787,GO:0005975,GO:0005737                                                                | carbohydrate metabolic process                                                       | cytoplasm                           | hydrolase activity                                                 |
| ug4559     | 106                  |                                                                                                 |                                                                                      |                                     |                                                                    |
| ug4560     | 260                  |                                                                                                 |                                                                                      |                                     |                                                                    |
| ug4561     | 740                  | GO:0009536                                                                                      |                                                                                      | plastid                             |                                                                    |
| ug4562     | 831                  | GO:0005886                                                                                      |                                                                                      | plasma membrane                     |                                                                    |
| ug4563     | 913                  | GO:0016020                                                                                      |                                                                                      | membrane                            |                                                                    |
| ug4564     | 568                  | GO:0005840,GO:0005198,GO:0006412,GO:0                                                           | translation                                                                          | ribosome                            | structural molecule activity,nucleotide binding                    |
| ug4565     | 106                  |                                                                                                 |                                                                                      |                                     |                                                                    |
| ug4566     | 301                  |                                                                                                 |                                                                                      |                                     |                                                                    |
| ug4567     | 461                  |                                                                                                 |                                                                                      |                                     |                                                                    |
| ug4568     | 554                  | GO:0005737,GO:0019538,GO:0009987,GO:0005886,GO:0005618,GO:0000166,GO:0005515,GO:0005215,GO:0009 | protein metabolic process,cellular process                                           | cytoplasm,plasma membrane,cell wall | nucleotide binding,protein binding                                 |
| ug4569     | 907                  | GO:0006810,GO:0009536,GO:0016020                                                                | response to biotic stimulus,transport                                                | plastid,membrane                    | transporter activity                                               |
| ug4570     | 217                  |                                                                                                 |                                                                                      |                                     |                                                                    |
| ug4571     | 829                  | GO:0003700,GO:0005634,GO:0005739,GO:0                                                           | transcription                                                                        | nucleus,mitochondrion               | transcription factor activity                                      |
| ug4572     | 212                  |                                                                                                 |                                                                                      |                                     |                                                                    |
| ug4573     | 411                  | GO:0016740,GO:0009058,GO:0005488                                                                | biosynthetic process                                                                 |                                     | transferase activity,binding                                       |
| ug4574     | 856                  |                                                                                                 |                                                                                      |                                     |                                                                    |
| ug4575     | 129                  |                                                                                                 |                                                                                      |                                     |                                                                    |
| ug4576     | 105                  |                                                                                                 |                                                                                      |                                     |                                                                    |
| ug4577     | 377                  | GO:0019538,GO:0009987,GO:0005829,GO:0                                                           | protein metabolic process,cellular process                                           | cytosol                             | protein binding                                                    |
| ug4578     | 874                  | GO:0005623,GO:0006                                                                              | response to stress                                                                   | cell                                |                                                                    |
| ug4579     | 161                  |                                                                                                 |                                                                                      |                                     |                                                                    |
| ug4580     | 514                  |                                                                                                 |                                                                                      |                                     |                                                                    |
| ug4581     | 552                  |                                                                                                 |                                                                                      |                                     |                                                                    |
| ug4582     | 175                  | GO:0003824,GO:0003674,GO:0006091,GO:0009056,GO:0016020,GO:0006464,GO:0016301,GO:0000166         | generation of precursor metabolites and energy,catabolic process                     | membrane,mitochondrion              | catalytic activity,molecular_function                              |
| ug4583     | 867                  |                                                                                                 | protein modification process                                                         |                                     | kinase activity,nucleotide binding                                 |
| ug4584     | 658                  |                                                                                                 |                                                                                      |                                     |                                                                    |
| ug4585     | 161                  |                                                                                                 |                                                                                      |                                     |                                                                    |
| ug4586     | 756                  | GO:0003677,GO:0003700,GO:0006350                                                                | transcription                                                                        |                                     | DNA binding,transcription factor activity                          |
| ug4587     | 122                  |                                                                                                 |                                                                                      |                                     |                                                                    |
| ug4588     | 105                  |                                                                                                 |                                                                                      |                                     |                                                                    |
| ug4589     | 807                  | GO:0005488,GO:0005618,GO:0016787                                                                |                                                                                      | cell wall                           | binding,hydrolase activity                                         |
| ug4590     | 259                  |                                                                                                 |                                                                                      |                                     |                                                                    |

| Unigene ID | sequence length (bp) | GO-ID                                                                                              | Biological process                                                                                                                                                                            | Cellular component     | Molecular function                                                       |
|------------|----------------------|----------------------------------------------------------------------------------------------------|-----------------------------------------------------------------------------------------------------------------------------------------------------------------------------------------------|------------------------|--------------------------------------------------------------------------|
| ug4591     | 444                  | GO:0005488,GO:0019538,GO:0009056,GO:009987,GO:0006464,GO:0007049,GO:0003824,GO:0005634,GO:000      | protein metabolic process,catabolic process,cellular process,protein modification process,cell cycle                                                                                          | nucleus,intracellular  | binding,catalytic activity                                               |
| ug4592     | 812                  |                                                                                                    |                                                                                                                                                                                               |                        |                                                                          |
| ug4593     | 285                  | GO:0003824                                                                                         |                                                                                                                                                                                               |                        | catalytic activity                                                       |
| ug4594     | 762                  | GO:0005488,GO:0005                                                                                 |                                                                                                                                                                                               |                        | binding,protein binding                                                  |
| ug4595     | 306                  |                                                                                                    |                                                                                                                                                                                               |                        |                                                                          |
| ug4596     | 543                  |                                                                                                    |                                                                                                                                                                                               |                        |                                                                          |
| ug4597     | 195                  |                                                                                                    |                                                                                                                                                                                               |                        |                                                                          |
| ug4598     | 390                  |                                                                                                    |                                                                                                                                                                                               |                        |                                                                          |
| ug4599     | 175                  |                                                                                                    |                                                                                                                                                                                               |                        |                                                                          |
| ug4600     | 316                  |                                                                                                    |                                                                                                                                                                                               |                        |                                                                          |
| ug4601     | 385                  |                                                                                                    |                                                                                                                                                                                               |                        |                                                                          |
| ug4602     | 794                  | GO:0008152,GO:000987,GO:0016787                                                                    | metabolic process,cellular process                                                                                                                                                            |                        | hydrolase activity                                                       |
| ug4603     | 152                  |                                                                                                    |                                                                                                                                                                                               |                        |                                                                          |
| ug4604     | 395                  |                                                                                                    |                                                                                                                                                                                               |                        |                                                                          |
| ug4605     | 796                  |                                                                                                    |                                                                                                                                                                                               |                        |                                                                          |
| ug4606     | 349                  | GO:0005840,GO:0007275,GO:0005198,GO:000                                                            | multicellular organismal development,translation                                                                                                                                              | ribosome               | structural molecule activity                                             |
| ug4607     | 895                  | GO:0006950,GO:0003824,GO:0006139,GO:0005975,GO:0009056,GO:0019748,GO:0005488,GO:0006519,GO:0005829 | response to stress,nucleobase, nucleoside, nucleotide and nucleic acid metabolic process,carbohydrate metabolic process,catabolic process,secondary metabolic process,cellular amino acid and | cytosol                | catalytic activity,binding                                               |
| ug4608     | 482                  |                                                                                                    |                                                                                                                                                                                               |                        |                                                                          |
| ug4609     | 145                  |                                                                                                    |                                                                                                                                                                                               |                        |                                                                          |
| ug4610     | 146                  |                                                                                                    |                                                                                                                                                                                               |                        |                                                                          |
| ug4611     | 277                  |                                                                                                    |                                                                                                                                                                                               |                        |                                                                          |
| ug4612     | 668                  |                                                                                                    |                                                                                                                                                                                               |                        |                                                                          |
| ug4613     | 494                  | GO:0016740,GO:0009058,GO:0005975                                                                   | biosynthetic process,carbohydrate metabolic process                                                                                                                                           |                        | transferase activity                                                     |
| ug4614     | 193                  | GO:0003677,GO:0006                                                                                 | transcription                                                                                                                                                                                 |                        | DNA binding                                                              |
| ug4615     | 728                  | GO:0016740,GO:0009058,GO:0006519                                                                   | biosynthetic process,cellular amino acid and derivative metabolic                                                                                                                             |                        | transferase activity                                                     |
| ug4616     | 162                  |                                                                                                    |                                                                                                                                                                                               |                        |                                                                          |
| ug4617     | 829                  | GO:0004872,GO:0006464,GO:0016301,GO:000                                                            | protein modification process                                                                                                                                                                  |                        | receptor activity,kinase activity,nucleotide binding                     |
| ug4618     | 825                  | GO:0005730,GO:0006139                                                                              | nucleobase, nucleoside, nucleotide and nucleic acid metabolic process                                                                                                                         | nucleolus              |                                                                          |
| ug4619     | 496                  |                                                                                                    |                                                                                                                                                                                               |                        |                                                                          |
| ug4620     | 550                  | GO:0005737                                                                                         |                                                                                                                                                                                               | cytoplasm              |                                                                          |
| ug4621     | 120                  |                                                                                                    |                                                                                                                                                                                               |                        |                                                                          |
| ug4622     | 912                  |                                                                                                    |                                                                                                                                                                                               |                        |                                                                          |
| ug4623     | 919                  |                                                                                                    |                                                                                                                                                                                               |                        |                                                                          |
| ug4624     | 136                  |                                                                                                    |                                                                                                                                                                                               |                        |                                                                          |
| ug4625     | 467                  |                                                                                                    |                                                                                                                                                                                               |                        |                                                                          |
| ug4626     | 231                  | GO:0005488,GO:0008152,GO:0003824,GO:000                                                            | metabolic process                                                                                                                                                                             |                        | binding,catalytic activity,molecular_function signal transducer activity |
| ug4627     | 841                  | GO:0007165,GO:0004                                                                                 | signal transduction                                                                                                                                                                           |                        |                                                                          |
| ug4628     | 477                  |                                                                                                    |                                                                                                                                                                                               |                        |                                                                          |
| ug4629     | 135                  |                                                                                                    |                                                                                                                                                                                               |                        |                                                                          |
| ug4630     | 769                  | GO:0005773,GO:0005                                                                                 |                                                                                                                                                                                               | vacuole                | binding                                                                  |
| ug4631     | 121                  |                                                                                                    |                                                                                                                                                                                               |                        |                                                                          |
| ug4632     | 866                  | GO:0006950,GO:0009628                                                                              | response to stress,response to abiotic stimulus                                                                                                                                               |                        |                                                                          |
| ug4633     | 536                  |                                                                                                    |                                                                                                                                                                                               |                        |                                                                          |
| ug4634     | 344                  | GO:0008150,GO:0006810,GO:0009991,GO:0007154,GO:0006950                                             | biological_process,transport,response to extracellular stimulus,cell communication,response to stress                                                                                         |                        |                                                                          |
| ug4635     | 873                  | GO:0016787                                                                                         |                                                                                                                                                                                               |                        | hydrolase activity                                                       |
| ug4636     | 608                  |                                                                                                    |                                                                                                                                                                                               |                        |                                                                          |
| ug4637     | 781                  | GO:0005515,GO:0005215,GO:0006810,GO:0009987,GO:0016020,GO:0003677,GO:0005                          | transport,cellular process                                                                                                                                                                    | membrane,cytoplasm     | protein binding,transporter activity                                     |
| ug4638     | 614                  | 515,GO:0003700,GO:0005634,GO:0006350                                                               | transcription                                                                                                                                                                                 | nucleus                | DNA binding,protein binding,transcription factor activity                |
| ug4639     | 195                  |                                                                                                    |                                                                                                                                                                                               |                        |                                                                          |
| ug4640     | 607                  | GO:0005622,GO:0003                                                                                 |                                                                                                                                                                                               | intracellular          | DNA binding                                                              |
| ug4641     | 642                  |                                                                                                    |                                                                                                                                                                                               |                        |                                                                          |
| ug4642     | 521                  | GO:0005198,GO:0005840,GO:0006412,GO:000                                                            | translation                                                                                                                                                                                   | ribosome,mitochondrion | structural molecule activity                                             |
| ug4643     | 254                  |                                                                                                    |                                                                                                                                                                                               |                        |                                                                          |
| ug4644     | 214                  |                                                                                                    |                                                                                                                                                                                               |                        |                                                                          |

| Unigene ID | sequence length (bp) | GO-ID                                                                                        | Biological process                                                                                                              | Cellular component                                                         | Molecular function                                            |
|------------|----------------------|----------------------------------------------------------------------------------------------|---------------------------------------------------------------------------------------------------------------------------------|----------------------------------------------------------------------------|---------------------------------------------------------------|
| ug4645     | 908                  | GO:0009987,GO:0005829,GO:0005515,GO:0006950,GO:0005488,GO:0003824,GO:000597                  | cellular process,response to stress,carbohydrate metabolic process                                                              | cytosol                                                                    | protein binding,protein binding,catalytic activity            |
| ug4646     | 836                  | GO:0009536                                                                                   |                                                                                                                                 | plastid                                                                    |                                                               |
| ug4647     | 778                  | GO:0005198,GO:0005840,GO:0006412                                                             | translation                                                                                                                     | ribosome                                                                   | structural molecule activity                                  |
| ug4648     | 405                  | GO:0016020                                                                                   |                                                                                                                                 | membrane                                                                   |                                                               |
| ug4649     | 785                  | GO:0009536                                                                                   |                                                                                                                                 | plastid                                                                    |                                                               |
| ug4650     | 520                  | GO:0005488,GO:0008152,GO:0009987,GO:0                                                        | metabolic process,cellular process                                                                                              |                                                                            | binding,catalytic activity                                    |
| ug4651     | 263                  | GO:0005737                                                                                   |                                                                                                                                 | cytoplasm                                                                  |                                                               |
| ug4652     | 763                  |                                                                                              |                                                                                                                                 |                                                                            |                                                               |
| ug4653     | 572                  | GO:0016020                                                                                   |                                                                                                                                 | membrane                                                                   |                                                               |
| ug4654     | 669                  |                                                                                              |                                                                                                                                 |                                                                            |                                                               |
| ug4655     | 331                  |                                                                                              |                                                                                                                                 |                                                                            |                                                               |
| ug4656     | 465                  | GO:0016020                                                                                   |                                                                                                                                 | membrane                                                                   |                                                               |
| ug4657     | 367                  |                                                                                              |                                                                                                                                 |                                                                            |                                                               |
| ug4658     | 664                  | GO:0006950,GO:0009628                                                                        | response to stress,response to abiotic stimulus                                                                                 |                                                                            |                                                               |
| ug4659     | 609                  |                                                                                              |                                                                                                                                 |                                                                            |                                                               |
| ug4660     | 572                  |                                                                                              |                                                                                                                                 |                                                                            |                                                               |
| ug4661     | 147                  |                                                                                              |                                                                                                                                 |                                                                            |                                                               |
| ug4662     | 480                  |                                                                                              |                                                                                                                                 |                                                                            |                                                               |
| ug4663     | 209                  |                                                                                              |                                                                                                                                 |                                                                            |                                                               |
| ug4664     | 102                  |                                                                                              |                                                                                                                                 |                                                                            |                                                               |
| ug4665     | 594                  |                                                                                              |                                                                                                                                 |                                                                            |                                                               |
| ug4666     | 866                  |                                                                                              |                                                                                                                                 |                                                                            |                                                               |
| ug4667     | 806                  | GO:0005737,GO:0009056,GO:0009987,GO:0016787,GO:0005488                                       | catabolic process,cellular process                                                                                              | cytoplasm                                                                  | hydrolase activity,protein binding                            |
| ug4668     | 318                  |                                                                                              |                                                                                                                                 |                                                                            |                                                               |
| ug4669     | 311                  |                                                                                              |                                                                                                                                 |                                                                            |                                                               |
| ug4670     | 516                  |                                                                                              |                                                                                                                                 |                                                                            |                                                               |
| ug4671     | 434                  | GO:0016020,GO:0006810,GO:0005215,GO:0005198,GO:0005618,GO:0000003,GO:0                       | transport                                                                                                                       | membrane,plasma membrane                                                   | transporter activity                                          |
| ug4672     | 603                  | GO:009791,GO:0009790,GO:0005840,GO:0005829,GO:0009536,GO:0016020,GO:0006412,GO:0             | reproduction,post-embryonic development,embryonic development,translation                                                       | cell wall,ribosome,cytosol,plastid,membrane                                | structural molecule activity,RNA binding                      |
| ug4673     | 830                  | GO:0005634,GO:0006259,GO:0009058,GO:0005773,GO:0006950,GO:0009628,GO:0005622,GO:0008150,GO:0 | DNA metabolic process,biosynthetic process                                                                                      | nucleus                                                                    |                                                               |
| ug4674     | 889                  | GO:0005886,GO:0019538,GO:0009056,GO:0009987,GO:0005634,GO:0005829,GO:0005576,                | response to stress,response to abiotic stimulus,biological_process,protein metabolic process,catabolic process,cellular process | vacuole,intracellular,plasma membrane,nucleus,cytosol,extracellular region | hydrolase activity                                            |
| ug4675     | 567                  |                                                                                              |                                                                                                                                 |                                                                            |                                                               |
| ug4676     | 301                  | GO:0005515                                                                                   |                                                                                                                                 |                                                                            | protein binding                                               |
| ug4677     | 566                  |                                                                                              |                                                                                                                                 |                                                                            |                                                               |
| ug4678     | 731                  | GO:0005488,GO:0016740,GO:0006519,GO:0009058,GO:0005739                                       | cellular amino acid and derivative metabolic process,biosynthetic process                                                       | mitochondrion                                                              | binding,transferase activity                                  |
| ug4679     | 271                  | GO:0016301                                                                                   |                                                                                                                                 |                                                                            | kinase activity                                               |
| ug4680     | 550                  | GO:0016043,GO:0009987,GO:0005856                                                             | cellular component organization,cellular process                                                                                | cytoskeleton                                                               |                                                               |
| ug4681     | 378                  | GO:0005488,GO:0005886,GO:0005773,GO:0                                                        |                                                                                                                                 | plasma membrane,vacuole                                                    | binding,molecular_function                                    |
| ug4682     | 580                  |                                                                                              |                                                                                                                                 |                                                                            |                                                               |
| ug4683     | 420                  | GO:0005739                                                                                   |                                                                                                                                 | mitochondrion                                                              |                                                               |
| ug4684     | 659                  |                                                                                              |                                                                                                                                 |                                                                            |                                                               |
| ug4685     | 787                  | GO:0006464,GO:0016301,GO:0000166                                                             | protein modification process                                                                                                    |                                                                            | kinase activity,nucleotide binding                            |
| ug4686     | 464                  | GO:0005623,GO:0019538,GO:0009056,GO:00030528,GO:0005198,GO:0005840,GO:0006412                | protein metabolic process,catabolic process                                                                                     | cell                                                                       | hydrolase activity                                            |
| ug4687     | 768                  | GO:0005739                                                                                   | translation                                                                                                                     | ribosome                                                                   | transcription regulator activity,structural molecule activity |
| ug4688     | 554                  |                                                                                              |                                                                                                                                 |                                                                            |                                                               |
| ug4689     | 238                  |                                                                                              |                                                                                                                                 |                                                                            |                                                               |
| ug4690     | 187                  |                                                                                              |                                                                                                                                 |                                                                            |                                                               |
| ug4691     | 173                  |                                                                                              |                                                                                                                                 |                                                                            |                                                               |
| ug4692     | 368                  |                                                                                              |                                                                                                                                 |                                                                            |                                                               |
| ug4693     | 746                  | GO:0005618                                                                                   |                                                                                                                                 | cell wall                                                                  |                                                               |
| ug4694     | 381                  |                                                                                              |                                                                                                                                 |                                                                            |                                                               |
| ug4695     | 100                  |                                                                                              |                                                                                                                                 |                                                                            |                                                               |

| Unigene ID | sequence length (bp) | GO-ID                                                                                                             | Biological process                                                                                                                                                    | Cellular component                                         | Molecular function                                                        |
|------------|----------------------|-------------------------------------------------------------------------------------------------------------------|-----------------------------------------------------------------------------------------------------------------------------------------------------------------------|------------------------------------------------------------|---------------------------------------------------------------------------|
| ug4696     | 699                  | GO:0009987,GO:0005515,GO:0006810                                                                                  | cellular process,transport                                                                                                                                            |                                                            | protein binding                                                           |
| ug4697     | 374                  | GO:0003677                                                                                                        |                                                                                                                                                                       |                                                            | DNA binding                                                               |
| ug4698     | 208                  |                                                                                                                   |                                                                                                                                                                       |                                                            |                                                                           |
| ug4699     | 308                  |                                                                                                                   |                                                                                                                                                                       |                                                            |                                                                           |
| ug4700     | 238                  | GO:0005886                                                                                                        |                                                                                                                                                                       | plasma membrane                                            |                                                                           |
| ug4701     | 201                  |                                                                                                                   |                                                                                                                                                                       |                                                            |                                                                           |
| ug4702     | 559                  |                                                                                                                   |                                                                                                                                                                       |                                                            |                                                                           |
| ug4703     | 208                  |                                                                                                                   |                                                                                                                                                                       |                                                            |                                                                           |
| ug4704     | 721                  |                                                                                                                   |                                                                                                                                                                       |                                                            |                                                                           |
| ug4705     | 579                  | GO:0016787,GO:0016043,GO:0009987,GO:0005618,GO:0005739                                                            | cellular component organization,cellular process                                                                                                                      | cell wall,mitochondrion                                    | hydrolase activity                                                        |
| ug4706     | 345                  | GO:0004518,GO:0005622,GO:0005488                                                                                  |                                                                                                                                                                       | intracellular                                              | nuclease activity,binding                                                 |
| ug4707     | 775                  | GO:0005488,GO:0016787,GO:0009058,GO:0009987,GO:0009536                                                            | biosynthetic process,cellular process                                                                                                                                 | plastid                                                    | binding,hydrolase activity                                                |
| ug4708     | 133                  |                                                                                                                   |                                                                                                                                                                       |                                                            |                                                                           |
| ug4709     | 136                  |                                                                                                                   |                                                                                                                                                                       |                                                            |                                                                           |
| ug4710     | 812                  | GO:0003723,GO:0016787,GO:0006139                                                                                  | nucleobase, nucleoside, nucleotide and nucleic acid metabolic process                                                                                                 |                                                            | RNA binding,hydrolase activity                                            |
| ug4711     | 412                  |                                                                                                                   |                                                                                                                                                                       |                                                            |                                                                           |
| ug4712     | 789                  | GO:0005488,GO:0005                                                                                                |                                                                                                                                                                       |                                                            | binding,protein binding                                                   |
| ug4713     | 274                  |                                                                                                                   |                                                                                                                                                                       |                                                            |                                                                           |
| ug4714     | 209                  |                                                                                                                   |                                                                                                                                                                       |                                                            |                                                                           |
| ug4715     | 855                  | GO:0016301,GO:0005730,GO:0005737,GO:0                                                                             |                                                                                                                                                                       | nucleolus,cytoplasm                                        | kinase activity,protein binding                                           |
| ug4716     | 457                  |                                                                                                                   |                                                                                                                                                                       |                                                            |                                                                           |
| ug4717     | 624                  |                                                                                                                   |                                                                                                                                                                       |                                                            |                                                                           |
| ug4718     | 751                  | GO:0009536                                                                                                        |                                                                                                                                                                       | plastid                                                    |                                                                           |
| ug4719     | 118                  |                                                                                                                   |                                                                                                                                                                       |                                                            |                                                                           |
| ug4720     | 710                  |                                                                                                                   |                                                                                                                                                                       |                                                            |                                                                           |
| ug4721     | 226                  |                                                                                                                   |                                                                                                                                                                       |                                                            |                                                                           |
| ug4722     | 115                  |                                                                                                                   |                                                                                                                                                                       |                                                            |                                                                           |
| ug4723     | 301                  | GO:0005515,GO:0003700,GO:0007165,GO:0009719,GO:0005634,GO:0016787,GO:0005737,GO:0003723,GO:0                      | signal transduction,response to endogenous stimulus,transcription                                                                                                     | nucleus                                                    | protein binding,transcription factor activity                             |
| ug4724     | 921                  | GO:0005488,GO:0006810,GO:0009987,GO:0016043,GO:0005515,GO:000                                                     | transport,cellular process,cellular component organization                                                                                                            | cytoplasm,plastid                                          | hydrolase activity,RNA binding,binding,protein binding,nucleotide binding |
| ug4725     | 310                  |                                                                                                                   |                                                                                                                                                                       |                                                            |                                                                           |
| ug4726     | 369                  |                                                                                                                   |                                                                                                                                                                       |                                                            |                                                                           |
| ug4727     | 781                  | GO:0005488                                                                                                        |                                                                                                                                                                       |                                                            | binding                                                                   |
| ug4728     | 560                  | GO:0008289                                                                                                        |                                                                                                                                                                       |                                                            | lipid binding                                                             |
| ug4729     | 207                  |                                                                                                                   |                                                                                                                                                                       |                                                            |                                                                           |
| ug4730     | 651                  | GO:0005488,GO:0006350,GO:0009908,GO:0006464,GO:0030528,GO:0005515,GO:000563                                       | transcription,flower development,protein modification process                                                                                                         | nucleus                                                    | binding,transcription regulator activity,protein binding                  |
| ug4731     | 719                  |                                                                                                                   |                                                                                                                                                                       |                                                            |                                                                           |
| ug4732     | 605                  |                                                                                                                   |                                                                                                                                                                       |                                                            |                                                                           |
| ug4733     | 867                  |                                                                                                                   |                                                                                                                                                                       |                                                            |                                                                           |
| ug4734     | 102                  |                                                                                                                   |                                                                                                                                                                       |                                                            |                                                                           |
| ug4735     | 643                  | GO:0003824                                                                                                        |                                                                                                                                                                       |                                                            | catalytic activity                                                        |
| ug4736     | 605                  |                                                                                                                   |                                                                                                                                                                       |                                                            |                                                                           |
| ug4737     | 289                  |                                                                                                                   |                                                                                                                                                                       |                                                            |                                                                           |
| ug4738     | 191                  |                                                                                                                   |                                                                                                                                                                       |                                                            |                                                                           |
| ug4739     | 621                  |                                                                                                                   |                                                                                                                                                                       |                                                            |                                                                           |
| ug4740     | 115                  |                                                                                                                   |                                                                                                                                                                       |                                                            |                                                                           |
| ug4741     | 825                  | GO:0006350,GO:0005575,GO:0016043,GO:0007275,GO:0005886,GO:0005515,GO:0030154,GO:0009987,GO:0005622,GO:0005737,GO: | transcription,cellular component organization,multicellular organismal development,cell differentiation,cellular process,anatomical structure morphogenesis,embryonic | cellular_component,plasma membrane,intracellular,cytoplasm | protein binding                                                           |
| ug4742     | 157                  |                                                                                                                   |                                                                                                                                                                       |                                                            |                                                                           |
| ug4743     | 611                  | GO:0005975                                                                                                        | carbohydrate metabolic process                                                                                                                                        |                                                            |                                                                           |
| ug4744     | 372                  |                                                                                                                   |                                                                                                                                                                       |                                                            |                                                                           |
| ug4745     | 443                  | GO:0005737,GO:0005488,GO:0016740                                                                                  |                                                                                                                                                                       | cytoplasm                                                  | binding,transferase activity                                              |
| ug4746     | 817                  |                                                                                                                   |                                                                                                                                                                       |                                                            |                                                                           |
| ug4747     | 575                  | GO:0005737,GO:0016301,GO:0005488,GO:0005975,GO:0006091,GO:0009056                                                 | carbohydrate metabolic process,generation of precursor metabolites and energy,catabolic process                                                                       | cytoplasm                                                  | kinase activity,binding                                                   |

| Unigene ID | sequence length (bp) | GO-ID                                                                                                         | Biological process                                                                                                                                                                                          | Cellular component      | Molecular function                                                                                                            |
|------------|----------------------|---------------------------------------------------------------------------------------------------------------|-------------------------------------------------------------------------------------------------------------------------------------------------------------------------------------------------------------|-------------------------|-------------------------------------------------------------------------------------------------------------------------------|
| ug4748     | 708                  | GO:0005739,GO:0005975,GO:0009987,GO:0009536,GO:0016301                                                        | carbohydrate metabolic process,cellular process                                                                                                                                                             | mitochondrion,plastid   | kinase activity                                                                                                               |
| ug4749     | 195                  | GO:0005737,GO:0003824,GO:0000166,GO:0006139,GO:0006412,GO:0006519                                             | nucleobase, nucleoside, nucleotide and nucleic acid metabolic process,translation,cellular amino acid and derivative metabolic                                                                              | cytoplasm               | catalytic activity,nucleotide binding                                                                                         |
| ug4750     | 291                  |                                                                                                               |                                                                                                                                                                                                             |                         |                                                                                                                               |
| ug4751     | 153                  |                                                                                                               |                                                                                                                                                                                                             |                         |                                                                                                                               |
| ug4752     | 366                  |                                                                                                               |                                                                                                                                                                                                             |                         |                                                                                                                               |
| ug4753     | 118                  |                                                                                                               |                                                                                                                                                                                                             |                         |                                                                                                                               |
| ug4754     | 591                  | GO:0008150,GO:0003677,GO:0000166,GO:0016787,GO:0040029,GO:0016043,GO:000635                                   | biological_process,regulation of gene expression, epigenetic,cellular component organization,transcription                                                                                                  |                         | DNA binding,nucleotide binding,hydrolase activity                                                                             |
| ug4755     | 121                  |                                                                                                               |                                                                                                                                                                                                             |                         |                                                                                                                               |
| ug4756     | 130                  |                                                                                                               |                                                                                                                                                                                                             |                         |                                                                                                                               |
| ug4757     | 665                  |                                                                                                               |                                                                                                                                                                                                             |                         |                                                                                                                               |
| ug4758     | 714                  | GO:0005623,GO:0016020,GO:0005737                                                                              |                                                                                                                                                                                                             | cell,membrane,cytoplasm |                                                                                                                               |
| ug4759     | 729                  | GO:0005783                                                                                                    |                                                                                                                                                                                                             | endoplasmic reticulum   |                                                                                                                               |
| ug4760     | 346                  | GO:0005515,GO:0007275,GO:0006464,GO:0019538,GO:0009056,GO:0009987,GO:0003824,GO:0005634,GO:000                | multicellular organismal development,protein modification process,protein metabolic process,catabolic process,cellular process                                                                              | nucleus                 | protein binding,catalytic activity,binding                                                                                    |
| ug4761     | 684                  |                                                                                                               |                                                                                                                                                                                                             |                         |                                                                                                                               |
| ug4762     | 302                  |                                                                                                               |                                                                                                                                                                                                             |                         |                                                                                                                               |
| ug4763     | 327                  |                                                                                                               |                                                                                                                                                                                                             |                         |                                                                                                                               |
| ug4764     | 293                  |                                                                                                               |                                                                                                                                                                                                             |                         |                                                                                                                               |
| ug4765     | 645                  |                                                                                                               |                                                                                                                                                                                                             |                         |                                                                                                                               |
| ug4766     | 751                  | GO:0008135,GO:0000166,GO:0009536,GO:0016787                                                                   |                                                                                                                                                                                                             | plastid                 | translation factor activity, nucleic acid binding,nucleotide transcription regulator                                          |
| ug4767     | 787                  | GO:0030528                                                                                                    |                                                                                                                                                                                                             |                         |                                                                                                                               |
| ug4768     | 274                  |                                                                                                               |                                                                                                                                                                                                             |                         |                                                                                                                               |
| ug4769     | 704                  |                                                                                                               |                                                                                                                                                                                                             |                         |                                                                                                                               |
| ug4770     | 389                  | GO:0009536                                                                                                    |                                                                                                                                                                                                             | plastid                 |                                                                                                                               |
| ug4771     | 307                  |                                                                                                               |                                                                                                                                                                                                             |                         |                                                                                                                               |
| ug4772     | 535                  | GO:0009536                                                                                                    |                                                                                                                                                                                                             | plastid                 |                                                                                                                               |
| ug4773     | 110                  |                                                                                                               |                                                                                                                                                                                                             |                         |                                                                                                                               |
| ug4774     | 464                  | GO:0003824,GO:0019538,GO:0009056,GO:0009987,GO:0006464,GO:0009536,GO:0016                                     | protein metabolic process,catabolic process,cellular process,protein modification process                                                                                                                   | plastid,membrane        | catalytic activity,nucleotide binding                                                                                         |
| ug4775     | 579                  | GO:0009536,GO:0016                                                                                            |                                                                                                                                                                                                             |                         |                                                                                                                               |
| ug4776     | 556                  |                                                                                                               |                                                                                                                                                                                                             |                         |                                                                                                                               |
| ug4777     | 799                  | GO:0005198,GO:0006                                                                                            | transport                                                                                                                                                                                                   |                         | structural molecule activity                                                                                                  |
| ug4778     | 684                  |                                                                                                               |                                                                                                                                                                                                             |                         |                                                                                                                               |
| ug4779     | 456                  | GO:0016301,GO:0000166,GO:0016740,GO:0003824,GO:0006139,GO:0006464,GO:0000166,GO:0016301,GO:000                | nucleobase, nucleoside, nucleotide and nucleic acid metabolic process,biosynthetic process protein modification process                                                                                     |                         | kinase activity,nucleotide binding,transferase activity,catalytic activity nucleotide binding,kinase activity,protein binding |
| ug4780     | 258                  | GO:0009058,GO:0009987,GO:0006629,GO:0009605,GO:0006950,GO:0006519,GO:0019748,GO:0009628,GO:0016020,GO:0016740 | biosynthetic process,cellular process,lipid metabolic process,response to external stimulus,response to stress,cellular amino acid and derivative metabolic process,secondary metabolic process,response to | membrane                | transferase activity                                                                                                          |
| ug4781     | 389                  | GO:0016020,GO:0005215,GO:0006810                                                                              | transport                                                                                                                                                                                                   | membrane                | transporter activity                                                                                                          |
| ug4782     | 692                  |                                                                                                               |                                                                                                                                                                                                             |                         |                                                                                                                               |
| ug4783     | 506                  |                                                                                                               |                                                                                                                                                                                                             |                         |                                                                                                                               |
| ug4784     | 464                  | GO:0016740,GO:0003677,GO:0005488,GO:0                                                                         | DNA metabolic process                                                                                                                                                                                       |                         | transferase activity,DNA binding,binding                                                                                      |
| ug4785     | 322                  |                                                                                                               |                                                                                                                                                                                                             |                         |                                                                                                                               |
| ug4786     | 648                  | GO:0019538,GO:0009987,GO:0005829,GO:0005198,GO:0009                                                           | protein metabolic process,cellular process                                                                                                                                                                  | cytosol                 | protein binding                                                                                                               |
| ug4787     | 386                  | 987,GO:0005840,GO:0005829,GO:0006412                                                                          | cellular process,translation                                                                                                                                                                                | ribosome,cytosol        | structural molecule activity                                                                                                  |
| ug4788     | 401                  |                                                                                                               |                                                                                                                                                                                                             |                         |                                                                                                                               |
| ug4789     | 249                  |                                                                                                               |                                                                                                                                                                                                             |                         |                                                                                                                               |
| ug4790     | 261                  | GO:0005488                                                                                                    |                                                                                                                                                                                                             |                         | binding                                                                                                                       |
| ug4791     | 197                  |                                                                                                               |                                                                                                                                                                                                             |                         |                                                                                                                               |
| ug4792     | 262                  |                                                                                                               |                                                                                                                                                                                                             |                         |                                                                                                                               |
| ug4793     | 764                  | GO:0005215,GO:0019725,GO:0016020,GO:0009536,GO:0005515,GO:0006810,GO:000998                                   | cellular homeostasis,transport,cellular process                                                                                                                                                             | membrane,plastid        | transporter activity,protein binding                                                                                          |

| Unigene ID | sequence length (bp) | GO-ID                                                                                                                    | Biological process                                                                                                                                  | Cellular component               | Molecular function                                |
|------------|----------------------|--------------------------------------------------------------------------------------------------------------------------|-----------------------------------------------------------------------------------------------------------------------------------------------------|----------------------------------|---------------------------------------------------|
| ug4794     | 771                  | GO:0016020,GO:0009536,GO:0009579                                                                                         |                                                                                                                                                     | membrane,plastid,thylakoid       |                                                   |
| ug4795     | 414                  |                                                                                                                          |                                                                                                                                                     |                                  |                                                   |
| ug4796     | 168                  |                                                                                                                          |                                                                                                                                                     |                                  |                                                   |
| ug4797     | 591                  | GO:0016020,GO:0005737,GO:0003824,GO:00016787                                                                             | lipid metabolic process                                                                                                                             | membrane,cytoplasm               | catalytic activity                                |
| ug4798     | 538                  | GO:0016787                                                                                                               |                                                                                                                                                     |                                  | hydrolase activity                                |
| ug4799     | 118                  |                                                                                                                          |                                                                                                                                                     |                                  |                                                   |
| ug4800     | 570                  |                                                                                                                          |                                                                                                                                                     |                                  |                                                   |
| ug4801     | 132                  |                                                                                                                          |                                                                                                                                                     |                                  |                                                   |
| ug4802     | 483                  |                                                                                                                          |                                                                                                                                                     |                                  |                                                   |
| ug4803     | 466                  |                                                                                                                          |                                                                                                                                                     |                                  |                                                   |
| ug4804     | 202                  |                                                                                                                          |                                                                                                                                                     |                                  |                                                   |
| ug4805     | 565                  | GO:0005622,GO:0009605,GO:0007165,GO:0009628,GO:0009791,GO:0003677,GO:0005515,GO:0006350,GO:000392                        | response to external stimulus,signal transduction,response to abiotic stimulus,post-embryonic development,transcription                             | intracellular,nucleus            | DNA binding,protein binding                       |
| ug4806     | 392                  |                                                                                                                          |                                                                                                                                                     |                                  |                                                   |
| ug4807     | 719                  | GO:0005488,GO:0009536,GO:0003824,GO:000154                                                                               | metabolic process                                                                                                                                   | plastid                          | binding,catalytic activity                        |
| ug4808     | 154                  |                                                                                                                          |                                                                                                                                                     |                                  |                                                   |
| ug4809     | 824                  | GO:0006464,GO:0005488,GO:0000166,GO:000405                                                                               | protein modification process                                                                                                                        |                                  | binding,nucleotide binding,kinase activity        |
| ug4810     | 405                  | GO:0005488                                                                                                               |                                                                                                                                                     |                                  | binding                                           |
| ug4811     | 494                  |                                                                                                                          |                                                                                                                                                     |                                  |                                                   |
| ug4812     | 245                  | GO:0003677,GO:000515,GO:0005634,GO:0005488,GO:0006350                                                                    | transcription                                                                                                                                       | nucleus                          | DNA binding,protein binding,kinase activity       |
| ug4813     | 103                  |                                                                                                                          |                                                                                                                                                     |                                  |                                                   |
| ug4814     | 433                  |                                                                                                                          |                                                                                                                                                     |                                  |                                                   |
| ug4815     | 902                  | GO:0003677,GO:0006350,GO:0005634                                                                                         | transcription                                                                                                                                       | nucleus                          | DNA binding                                       |
| ug4816     | 690                  | GO:0005623,GO:000629,GO:0016787                                                                                          | lipid metabolic process                                                                                                                             | cell                             | hydrolase activity                                |
| ug4817     | 858                  | GO:0016020,GO:0006810,GO:0009058,GO:0006091,GO:0006139,GO:0005773,GO:0016787,GO:0005215,GO:0006464,GO:0000166,GO:0016301 | transport,biosynthetic process,generation of precursor metabolites and energy,nucleobase, nucleoside, nucleotide and nucleic acid metabolic process | membrane,vacuole,plasma membrane | hydrolase activity,transporter activity           |
| ug4818     | 937                  | GO:0006464,GO:0000166,GO:0016301                                                                                         | protein modification process                                                                                                                        |                                  | nucleotide binding,kinase activity                |
| ug4819     | 894                  | GO:0016740                                                                                                               |                                                                                                                                                     |                                  | transferase activity                              |
| ug4820     | 343                  |                                                                                                                          |                                                                                                                                                     |                                  |                                                   |
| ug4821     | 933                  |                                                                                                                          |                                                                                                                                                     |                                  |                                                   |
| ug4822     | 894                  | GO:0005634,GO:0006139                                                                                                    | nucleobase, nucleoside, nucleotide and nucleic acid metabolic process                                                                               | nucleus                          |                                                   |
| ug4823     | 921                  |                                                                                                                          |                                                                                                                                                     |                                  |                                                   |
| ug4824     | 304                  |                                                                                                                          |                                                                                                                                                     |                                  |                                                   |
| ug4825     | 105                  |                                                                                                                          |                                                                                                                                                     |                                  |                                                   |
| ug4826     | 387                  |                                                                                                                          |                                                                                                                                                     |                                  |                                                   |
| ug4827     | 427                  | GO:0006259,GO:0009536,GO:0003677,GO:00016787,GO:0005622,GO:000392                                                        | DNA metabolic process,biosynthetic process                                                                                                          | intracellular                    | DNA binding,hydrolase activity,nucleotide binding |
| ug4828     | 392                  |                                                                                                                          |                                                                                                                                                     |                                  |                                                   |
| ug4829     | 422                  |                                                                                                                          |                                                                                                                                                     |                                  |                                                   |
| ug4830     | 818                  | GO:0008150,GO:0003839                                                                                                    | biological_process                                                                                                                                  |                                  | transcription factor activity                     |
| ug4831     | 839                  | GO:0003723                                                                                                               |                                                                                                                                                     |                                  | RNA binding                                       |
| ug4832     | 169                  |                                                                                                                          |                                                                                                                                                     |                                  |                                                   |
| ug4833     | 242                  |                                                                                                                          |                                                                                                                                                     |                                  |                                                   |
| ug4834     | 698                  | GO:0016020,GO:0009579,GO:0009536                                                                                         |                                                                                                                                                     | membrane,thylakoid,plastid       |                                                   |
| ug4835     | 491                  |                                                                                                                          |                                                                                                                                                     |                                  |                                                   |
| ug4836     | 730                  | GO:0003824,GO:0006139,GO:0006412,GO:0006519,GO:0000166                                                                   | nucleobase, nucleoside, nucleotide and nucleic acid metabolic process,translation,cellular amino acid and derivative metabolic                      |                                  | catalytic activity,nucleotide binding             |
| ug4837     | 242                  |                                                                                                                          |                                                                                                                                                     |                                  |                                                   |
| ug4838     | 680                  |                                                                                                                          |                                                                                                                                                     |                                  |                                                   |
| ug4839     | 146                  |                                                                                                                          |                                                                                                                                                     |                                  |                                                   |
| ug4840     | 333                  |                                                                                                                          |                                                                                                                                                     |                                  |                                                   |
| ug4841     | 247                  |                                                                                                                          |                                                                                                                                                     |                                  |                                                   |
| ug4842     | 690                  |                                                                                                                          |                                                                                                                                                     |                                  |                                                   |
| ug4843     | 119                  |                                                                                                                          |                                                                                                                                                     |                                  |                                                   |
| ug4844     | 132                  |                                                                                                                          |                                                                                                                                                     |                                  |                                                   |
| ug4845     | 203                  |                                                                                                                          |                                                                                                                                                     |                                  |                                                   |
| ug4846     | 436                  |                                                                                                                          |                                                                                                                                                     |                                  |                                                   |
| ug4847     | 112                  |                                                                                                                          |                                                                                                                                                     |                                  |                                                   |
| ug4848     | 765                  |                                                                                                                          |                                                                                                                                                     |                                  |                                                   |



| Unigene ID | sequence length (bp) | GO-ID                                                                                                                                               | Biological process                                                                                                    | Cellular component                                   | Molecular function                            |
|------------|----------------------|-----------------------------------------------------------------------------------------------------------------------------------------------------|-----------------------------------------------------------------------------------------------------------------------|------------------------------------------------------|-----------------------------------------------|
| ug4849     | 794                  | GO:0005488,GO:0008152,GO:0003824,GO:0                                                                                                               | metabolic process                                                                                                     |                                                      | binding,catalytic activity,molecular_function |
| ug4850     | 666                  |                                                                                                                                                     |                                                                                                                       |                                                      |                                               |
| ug4851     | 563                  |                                                                                                                                                     |                                                                                                                       |                                                      |                                               |
| ug4852     | 824                  | GO:0005739,GO:0016043,GO:0009987,GO:0                                                                                                               | cellular component organization,cellular process                                                                      | mitochondrion,plastid                                |                                               |
| ug4853     | 333                  |                                                                                                                                                     |                                                                                                                       |                                                      |                                               |
| ug4854     | 408                  |                                                                                                                                                     |                                                                                                                       |                                                      |                                               |
| ug4855     | 431                  |                                                                                                                                                     |                                                                                                                       |                                                      |                                               |
| ug4856     | 555                  | GO:0003824,GO:0009536,GO:0008150,GO:005618,GO:0009058,GO:0006519,GO:0005488,GO:0005576,GO:00016740,GO:0009058,GO:0009987,GO:0006629,GO:0019748,GO:0 | biological_process,biosynthetic process,cellular amino acid and derivative metabolic process                          | plastid,cell wall,extracellular region,mitochondrion | catalytic activity,binding                    |
| ug4857     | 892                  | GO:0016740,GO:0009058,GO:0009987,GO:0006629,GO:0019748,GO:0                                                                                         | biosynthetic process,cellular process,lipid metabolic process,secondary metabolic                                     | plastid                                              | transferase activity                          |
| ug4858     | 752                  |                                                                                                                                                     |                                                                                                                       |                                                      |                                               |
| ug4859     | 224                  |                                                                                                                                                     |                                                                                                                       |                                                      |                                               |
| ug4860     | 194                  |                                                                                                                                                     |                                                                                                                       |                                                      |                                               |
| ug4861     | 851                  | GO:0005515                                                                                                                                          |                                                                                                                       |                                                      | protein binding                               |
| ug4862     | 617                  | GO:0016740,GO:0008150,GO:0016020,GO:0005622,GO:0009058,GO:0009987,GO:0000003,GO:0009791,GO:0009790,GO:0009536,GO:000                                | metabolic process biosynthetic process,cellular process,reproduction,post-embryonic development,embryonic development | membrane,intracellular,plastid,mitochondrion         | transferase activity                          |
| ug4864     | 281                  |                                                                                                                                                     |                                                                                                                       |                                                      |                                               |
| ug4865     | 622                  |                                                                                                                                                     |                                                                                                                       |                                                      |                                               |
| ug4866     | 634                  |                                                                                                                                                     |                                                                                                                       |                                                      |                                               |
| ug4867     | 887                  | GO:0005618,GO:0008152,GO:0003824,GO:0                                                                                                               | metabolic process                                                                                                     | cell wall,plastid                                    | catalytic activity                            |
| ug4868     | 334                  |                                                                                                                                                     |                                                                                                                       |                                                      |                                               |
| ug4869     | 610                  |                                                                                                                                                     |                                                                                                                       |                                                      |                                               |
| ug4870     | 165                  |                                                                                                                                                     |                                                                                                                       |                                                      |                                               |
| ug4871     | 555                  |                                                                                                                                                     |                                                                                                                       |                                                      |                                               |
| ug4872     | 494                  |                                                                                                                                                     |                                                                                                                       |                                                      |                                               |
| ug4873     | 208                  | GO:0009536                                                                                                                                          |                                                                                                                       | plastid                                              |                                               |
| ug4874     | 155                  |                                                                                                                                                     |                                                                                                                       |                                                      |                                               |
| ug4875     | 151                  |                                                                                                                                                     |                                                                                                                       |                                                      |                                               |
| ug4876     | 743                  | GO:0003677,GO:0006                                                                                                                                  | transcription                                                                                                         |                                                      | DNA binding                                   |
| ug4877     | 902                  |                                                                                                                                                     |                                                                                                                       |                                                      |                                               |
| ug4878     | 654                  |                                                                                                                                                     |                                                                                                                       |                                                      |                                               |
| ug4879     | 181                  |                                                                                                                                                     |                                                                                                                       |                                                      |                                               |
| ug4880     | 482                  |                                                                                                                                                     |                                                                                                                       |                                                      |                                               |
| ug4881     | 122                  |                                                                                                                                                     |                                                                                                                       |                                                      |                                               |
| ug4882     | 106                  |                                                                                                                                                     |                                                                                                                       |                                                      |                                               |
| ug4883     | 333                  |                                                                                                                                                     |                                                                                                                       |                                                      |                                               |
| ug4884     | 723                  | GO:0016020,GO:0005739,GO:0009536                                                                                                                    |                                                                                                                       | membrane,mitochondrion,plastid                       |                                               |
| ug4885     | 411                  |                                                                                                                                                     |                                                                                                                       |                                                      |                                               |
| ug4886     | 888                  | GO:0003824,GO:0005975,GO:0006091,GO:0009056,GO:0009536                                                                                              | carbohydrate metabolic process,generation of precursor metabolites and energy,catabolic process                       | plastid                                              | catalytic activity                            |
| ug4887     | 725                  | GO:0000166,GO:0016787                                                                                                                               |                                                                                                                       |                                                      | nucleotide binding,hydrolase activity         |
| ug4888     | 435                  | GO:0016787,GO:0005                                                                                                                                  |                                                                                                                       | peroxisome                                           | hydrolase activity                            |
| ug4889     | 360                  |                                                                                                                                                     |                                                                                                                       |                                                      |                                               |
| ug4890     | 116                  |                                                                                                                                                     |                                                                                                                       |                                                      |                                               |
| ug4891     | 434                  |                                                                                                                                                     |                                                                                                                       |                                                      |                                               |
| ug4892     | 822                  |                                                                                                                                                     |                                                                                                                       |                                                      |                                               |
| ug4893     | 135                  |                                                                                                                                                     |                                                                                                                       |                                                      |                                               |
| ug4894     | 835                  | GO:0016740,GO:0006519,GO:0009536                                                                                                                    | cellular amino acid and derivative metabolic process                                                                  | plastid                                              | transferase activity                          |
| ug4895     | 134                  |                                                                                                                                                     |                                                                                                                       |                                                      |                                               |
| ug4896     | 779                  |                                                                                                                                                     |                                                                                                                       |                                                      |                                               |
| ug4897     | 272                  |                                                                                                                                                     |                                                                                                                       |                                                      |                                               |
| ug4898     | 288                  |                                                                                                                                                     |                                                                                                                       |                                                      |                                               |
| ug4899     | 155                  |                                                                                                                                                     |                                                                                                                       |                                                      |                                               |
| ug4900     | 814                  |                                                                                                                                                     |                                                                                                                       |                                                      |                                               |
| ug4901     | 143                  |                                                                                                                                                     |                                                                                                                       |                                                      |                                               |
| ug4902     | 448                  | GO:0005739,GO:0006                                                                                                                                  | transport                                                                                                             | mitochondrion                                        |                                               |
| ug4903     | 677                  | GO:0016020,GO:0005215,GO:0009536,GO:0                                                                                                               | transport                                                                                                             | membrane,plastid                                     | transporter activity                          |
| ug4904     | 578                  |                                                                                                                                                     |                                                                                                                       |                                                      |                                               |
| ug4905     | 234                  |                                                                                                                                                     |                                                                                                                       |                                                      |                                               |
| ug4906     | 270                  |                                                                                                                                                     |                                                                                                                       |                                                      |                                               |
| ug4907     | 726                  | GO:0009987                                                                                                                                          | cellular process                                                                                                      |                                                      |                                               |
| ug4908     | 779                  |                                                                                                                                                     |                                                                                                                       |                                                      |                                               |

| Unigene ID | sequence length (bp) | GO-ID                                                                                                                                                                                      | Biological process                                                                                                                                       | Cellular component                      | Molecular function                                                                        |
|------------|----------------------|--------------------------------------------------------------------------------------------------------------------------------------------------------------------------------------------|----------------------------------------------------------------------------------------------------------------------------------------------------------|-----------------------------------------|-------------------------------------------------------------------------------------------|
| ug4909     | 684                  |                                                                                                                                                                                            |                                                                                                                                                          |                                         |                                                                                           |
| ug4910     | 346                  |                                                                                                                                                                                            |                                                                                                                                                          |                                         |                                                                                           |
| ug4911     | 305                  |                                                                                                                                                                                            |                                                                                                                                                          |                                         |                                                                                           |
| ug4912     | 282                  |                                                                                                                                                                                            |                                                                                                                                                          |                                         |                                                                                           |
| ug4913     | 499                  | GO:0006259,GO:0003676,GO:0003824                                                                                                                                                           | DNA metabolic process                                                                                                                                    |                                         | nucleic acid binding,catalytic activity                                                   |
| ug4914     | 825                  | GO:0003824,GO:0000166                                                                                                                                                                      |                                                                                                                                                          |                                         | catalytic activity,nucleotide binding                                                     |
| ug4915     | 498                  | GO:0006139,GO:0016740                                                                                                                                                                      | nucleobase, nucleoside, nucleotide and nucleic acid metabolic process                                                                                    |                                         | transferase activity                                                                      |
| ug4916     | 394                  | GO:0019538,GO:000987,GO:0005515,GO:000166,GO:0009536                                                                                                                                       | protein metabolic process,cellular process                                                                                                               | plastid                                 | protein binding,nucleotide binding                                                        |
| ug4917     | 731                  | GO:0005737,GO:0016125                                                                                                                                                                      |                                                                                                                                                          | cytoplasm                               | hydrolase activity                                                                        |
| ug4918     | 125                  |                                                                                                                                                                                            |                                                                                                                                                          |                                         |                                                                                           |
| ug4919     | 315                  |                                                                                                                                                                                            |                                                                                                                                                          |                                         |                                                                                           |
| ug4920     | 424                  | GO:0016020,GO:0007GO:0006259,GO:0009058,GO:0000166,GO:0009536,GO:0003824,GO:0009056,GO:0006519,GO:0016740,GO:0005737,GO:0005739                                                            | signal transduction DNA metabolic process,biosynthetic process,response to stress catabolic process,cellular amino acid and derivative metabolic process | membrane                                |                                                                                           |
| ug4921     | 682                  | GO:0009056,GO:0006519,GO:0016740,GO:0005737,GO:0005739                                                                                                                                     |                                                                                                                                                          | plastid                                 | nucleotide binding,catalytic activity                                                     |
| ug4922     | 700                  | GO:0016787,GO:0005975,GO:0005773,GO:0003723,GO:0005488,GO:0006259,GO:0009058,GO:0005739,GO:0016043,GO:0009987,GO:0016740,GO:0003677,GO:0019538,GO:0009056,GO:0005622,GO:0016787,GO:0003473 | carbohydrate metabolic process                                                                                                                           | cytoplasm,mitochondrion                 | transferase activity                                                                      |
| ug4923     | 559                  |                                                                                                                                                                                            |                                                                                                                                                          | vacuole                                 | hydrolase activity                                                                        |
| ug4924     | 473                  |                                                                                                                                                                                            |                                                                                                                                                          | mitochondrion,intracellular,nucleus     | RNA binding,binding,transferase activity,DNA binding,hydrolase activity,chromatin binding |
| ug4925     | 485                  |                                                                                                                                                                                            |                                                                                                                                                          |                                         |                                                                                           |
| ug4926     | 170                  |                                                                                                                                                                                            |                                                                                                                                                          |                                         |                                                                                           |
| ug4927     | 845                  | GO:0005515                                                                                                                                                                                 |                                                                                                                                                          |                                         | protein binding                                                                           |
| ug4928     | 207                  |                                                                                                                                                                                            |                                                                                                                                                          |                                         |                                                                                           |
| ug4929     | 809                  | GO:0016043,GO:0009987,GO:0005515,GO:0009653,GO:0016049                                                                                                                                     | cellular component organization,cellular process,anatomical structure                                                                                    |                                         | protein binding                                                                           |
| ug4930     | 185                  |                                                                                                                                                                                            |                                                                                                                                                          |                                         |                                                                                           |
| ug4931     | 129                  |                                                                                                                                                                                            |                                                                                                                                                          |                                         |                                                                                           |
| ug4932     | 775                  |                                                                                                                                                                                            |                                                                                                                                                          |                                         |                                                                                           |
| ug4933     | 405                  |                                                                                                                                                                                            |                                                                                                                                                          |                                         |                                                                                           |
| ug4934     | 443                  |                                                                                                                                                                                            |                                                                                                                                                          |                                         |                                                                                           |
| ug4935     | 261                  |                                                                                                                                                                                            |                                                                                                                                                          |                                         |                                                                                           |
| ug4936     | 179                  |                                                                                                                                                                                            |                                                                                                                                                          |                                         |                                                                                           |
| ug4937     | 632                  |                                                                                                                                                                                            |                                                                                                                                                          |                                         |                                                                                           |
| ug4938     | 857                  | GO:0003674,GO:0019725,GO:0008152,GO:0009536,GO:0003824                                                                                                                                     | cellular homeostasis,metabolic process                                                                                                                   | plastid                                 | molecular_function,catalytic activity                                                     |
| ug4939     | 188                  |                                                                                                                                                                                            |                                                                                                                                                          |                                         |                                                                                           |
| ug4940     | 421                  | GO:0005488,GO:0008135,GO:0000166                                                                                                                                                           |                                                                                                                                                          |                                         | binding,translation factor activity, nucleic acid binding,nucleotide binding              |
| ug4941     | 571                  | GO:0005515,GO:0005215,GO:0005886,GO:0006810,GO:0009987,GO:0009536                                                                                                                          | transport,cellular process                                                                                                                               | plasma membrane,mitochondrion           | protein binding,transporter activity                                                      |
| ug4942     | 335                  | GO:0009536                                                                                                                                                                                 |                                                                                                                                                          | plastid                                 |                                                                                           |
| ug4943     | 434                  | GO:0005737,GO:0005488,GO:0005975,GO:0009987,GO:0009056,GO:0006259                                                                                                                          | carbohydrate metabolic process,cellular process,catabolic process                                                                                        | cytoplasm                               | binding,catalytic activity                                                                |
| ug4944     | 211                  |                                                                                                                                                                                            |                                                                                                                                                          |                                         |                                                                                           |
| ug4945     | 714                  | GO:0016020,GO:0005739,GO:0005488,GO:0006810,GO:0005215                                                                                                                                     | transport                                                                                                                                                | membrane,mitochondrion                  | binding,transporter activity                                                              |
| ug4946     | 673                  | GO:0016020                                                                                                                                                                                 |                                                                                                                                                          | membrane                                |                                                                                           |
| ug4947     | 734                  | GO:0004872,GO:0006464,GO:0005737,GO:0005886,GO:0005515,GO:0000166,GO:0016301,GO:0007165,GO:000438                                                                                          | protein modification process,signal transduction                                                                                                         | cytoplasm,plasma membrane,mitochondrion | receptor activity,protein binding,nucleotide binding,kinase activity                      |
| ug4948     | 438                  |                                                                                                                                                                                            |                                                                                                                                                          |                                         |                                                                                           |
| ug4949     | 655                  | GO:0016020,GO:0009579,GO:0009536,GO:0005515,GO:0006810,GO:0009987,GO:0005737,GO:0016020,GO:0009653,GO:000979                                                                               | photosynthesis transport,cellular process,anatomical structure morphogenesis,post-embryonic development                                                  | membrane,thylakoid,plastid              |                                                                                           |
| ug4950     | 541                  |                                                                                                                                                                                            |                                                                                                                                                          | cytoplasm,membrane                      | protein binding                                                                           |
| ug4951     | 443                  |                                                                                                                                                                                            |                                                                                                                                                          |                                         |                                                                                           |

| Unigene ID | sequence length (bp) | GO-ID                                                                                                         | Biological process                                                                                                                                                                       | Cellular component             | Molecular function                      |
|------------|----------------------|---------------------------------------------------------------------------------------------------------------|------------------------------------------------------------------------------------------------------------------------------------------------------------------------------------------|--------------------------------|-----------------------------------------|
| ug4952     | 916                  | GO:0006139,GO:0006412,GO:0006519,GO:0005739,GO:0000003,GO:0009791,GO:0009790,GO:0001666,GO:0003824,GO:0009536 | nucleobase, nucleoside, nucleotide and nucleic acid metabolic process,translation,cellular amino acid and derivative metabolic process,reproduction,post-embryonic development,embryonic | mitochondrion,plastid          | nucleotide binding,catalytic activity   |
| ug4953     | 108                  |                                                                                                               |                                                                                                                                                                                          |                                |                                         |
| ug4954     | 652                  | GO:0005623,GO:0016787,GO:0006464,GO:0006350,GO:000908,GO:0003700,GO:0005634,GO:0005515                        | protein modification process                                                                                                                                                             | cell                           | hydrolase activity,binding              |
| ug4955     | 218                  |                                                                                                               |                                                                                                                                                                                          |                                |                                         |
| ug4956     | 384                  |                                                                                                               |                                                                                                                                                                                          |                                |                                         |
| ug4957     | 945                  |                                                                                                               |                                                                                                                                                                                          |                                |                                         |
| ug4958     | 759                  |                                                                                                               |                                                                                                                                                                                          |                                |                                         |
| ug4959     | 457                  |                                                                                                               |                                                                                                                                                                                          |                                |                                         |
| ug4960     | 461                  | GO:0016740,GO:0009058,GO:0006519,GO:0003824,GO:0009536                                                        | biosynthetic process,cellular amino acid and derivative metabolic process                                                                                                                | plastid                        | transferase activity,catalytic activity |
| ug4961     | 215                  |                                                                                                               |                                                                                                                                                                                          |                                |                                         |
| ug4962     | 106                  |                                                                                                               |                                                                                                                                                                                          |                                |                                         |
| ug4963     | 931                  | GO:0005975,GO:0009987,GO:0008152,GO:0003824,GO:0000166                                                        | carbohydrate metabolic process,cellular process,metabolic process                                                                                                                        |                                | catalytic activity,nucleotide binding   |
| ug4964     | 126                  |                                                                                                               |                                                                                                                                                                                          |                                |                                         |
| ug4965     | 370                  | GO:0006091,GO:001979,GO:0016020,GO:0009579,GO:0005488,GO:0006464,GO:000953                                    | generation of precursor metabolites and energy,photosynthesis,protein modification process                                                                                               | membrane,thylakoid,plastid     | binding                                 |
| ug4966     | 132                  |                                                                                                               |                                                                                                                                                                                          |                                |                                         |
| ug4967     | 205                  |                                                                                                               |                                                                                                                                                                                          |                                |                                         |
| ug4968     | 773                  | GO:0005488,GO:0005515,GO:0016020                                                                              |                                                                                                                                                                                          | membrane                       | binding,protein binding                 |
| ug4969     | 325                  |                                                                                                               |                                                                                                                                                                                          |                                |                                         |
| ug4970     | 110                  |                                                                                                               |                                                                                                                                                                                          |                                |                                         |
| ug4971     | 897                  |                                                                                                               |                                                                                                                                                                                          |                                |                                         |
| ug4972     | 255                  |                                                                                                               |                                                                                                                                                                                          |                                |                                         |
| ug4973     | 186                  |                                                                                                               |                                                                                                                                                                                          |                                |                                         |
| ug4974     | 252                  |                                                                                                               |                                                                                                                                                                                          |                                |                                         |
| ug4975     | 389                  | GO:0016740,GO:0009058,GO:0009987,GO:0006629,GO:0009991,GO:0007154,GO:0006950,GO:0016787,GO:0003550,GO:0005634 | biosynthetic process,cellular process,lipid metabolic process,response to extracellular stimulus,cell communication,response to stress                                                   | plastid                        | transferase activity,hydrolase activity |
| ug4976     | 789                  | GO:0003677,GO:0006350,GO:0005634                                                                              | transcription                                                                                                                                                                            | nucleus                        | DNA binding                             |
| ug4977     | 754                  | GO:0005488,GO:001979                                                                                          | cellular homeostasis                                                                                                                                                                     |                                | binding                                 |
| ug4978     | 177                  |                                                                                                               |                                                                                                                                                                                          |                                |                                         |
| ug4979     | 225                  |                                                                                                               |                                                                                                                                                                                          |                                |                                         |
| ug4980     | 177                  |                                                                                                               |                                                                                                                                                                                          |                                |                                         |
| ug4981     | 142                  |                                                                                                               |                                                                                                                                                                                          |                                |                                         |
| ug4982     | 252                  |                                                                                                               |                                                                                                                                                                                          |                                |                                         |
| ug4983     | 299                  |                                                                                                               |                                                                                                                                                                                          |                                |                                         |
| ug4984     | 442                  |                                                                                                               |                                                                                                                                                                                          |                                |                                         |
| ug4985     | 292                  |                                                                                                               |                                                                                                                                                                                          |                                |                                         |
| ug4986     | 423                  |                                                                                                               |                                                                                                                                                                                          |                                |                                         |
| ug4987     | 163                  | GO:0019538,GO:0009987,GO:0005737,GO:0005515,GO:0000166                                                        | protein metabolic process,cellular process                                                                                                                                               | cytoplasm                      | protein binding,nucleotide binding      |
| ug4988     | 422                  |                                                                                                               |                                                                                                                                                                                          |                                |                                         |
| ug4989     | 160                  |                                                                                                               |                                                                                                                                                                                          |                                |                                         |
| ug4990     | 126                  |                                                                                                               |                                                                                                                                                                                          |                                |                                         |
| ug4991     | 279                  |                                                                                                               |                                                                                                                                                                                          |                                |                                         |
| ug4992     | 211                  |                                                                                                               |                                                                                                                                                                                          |                                |                                         |
| ug4993     | 604                  |                                                                                                               |                                                                                                                                                                                          |                                |                                         |
| ug4994     | 154                  |                                                                                                               |                                                                                                                                                                                          |                                |                                         |
| ug4995     | 427                  | GO:0005886,GO:0006320                                                                                         | response to stress                                                                                                                                                                       | plasma membrane                |                                         |
| ug4996     | 320                  |                                                                                                               |                                                                                                                                                                                          |                                |                                         |
| ug4997     | 694                  | GO:0005515,GO:0007049,GO:0016043,GO:0009987,GO:0005856,GO:0005737,GO:000563                                   | cell cycle,cellular component organization,cellular process                                                                                                                              | cytoskeleton,cytoplasm,nucleus | protein binding                         |
| ug4998     | 423                  | GO:0000166,GO:0005737,GO:0003824,GO:000555                                                                    | metabolic process                                                                                                                                                                        | cytoplasm                      | nucleotide binding,catalytic activity   |
| ug4999     | 555                  |                                                                                                               |                                                                                                                                                                                          |                                |                                         |
| ug5000     | 816                  |                                                                                                               |                                                                                                                                                                                          |                                |                                         |
| ug5001     | 141                  |                                                                                                               |                                                                                                                                                                                          |                                |                                         |
| ug5002     | 827                  | GO:0019538,GO:0009987,GO:0003824,GO:0006464                                                                   | protein metabolic process,catabolic process,cellular process,protein modification process                                                                                                |                                | catalytic activity                      |

| Unigene ID | sequence length (bp) | GO-ID                                                                        | Biological process                                                                               | Cellular component             | Molecular function                                              |
|------------|----------------------|------------------------------------------------------------------------------|--------------------------------------------------------------------------------------------------|--------------------------------|-----------------------------------------------------------------|
| ug5003     | 146                  |                                                                              |                                                                                                  |                                |                                                                 |
| ug5004     | 127                  |                                                                              |                                                                                                  |                                |                                                                 |
|            |                      | GO:0003774,GO:0005856,GO:0016043,GO:007049,GO:0009653,G                      | cellular component<br>organization,cell cycle,anatomical<br>structure morphogenesis,flower       |                                | motor activity,nucleotide binding,protein                       |
| ug5005     | 437                  | O:0009908,GO:0000166,GO:0007165,GO:0009719,GO:0009987,GO:0005515,GO:0003700, | development,signal<br>transduction,response to<br>endogenous stimulus,cellular<br>process        | cytoskeleton,cytoplasm,nucleus | binding,transcription factor<br>activity                        |
| ug5006     | 631                  |                                                                              |                                                                                                  |                                |                                                                 |
| ug5007     | 849                  |                                                                              |                                                                                                  |                                |                                                                 |
| ug5008     | 832                  | GO:0005488,GO:0005                                                           |                                                                                                  | plasma membrane                | binding                                                         |
| ug5009     | 183                  |                                                                              |                                                                                                  |                                |                                                                 |
| ug5010     | 275                  |                                                                              |                                                                                                  |                                |                                                                 |
| ug5011     | 140                  |                                                                              |                                                                                                  |                                |                                                                 |
| ug5012     | 192                  |                                                                              |                                                                                                  |                                |                                                                 |
| ug5013     | 306                  |                                                                              |                                                                                                  |                                |                                                                 |
| ug5014     | 573                  |                                                                              |                                                                                                  |                                |                                                                 |
| ug5015     | 286                  |                                                                              |                                                                                                  |                                |                                                                 |
| ug5016     | 212                  |                                                                              |                                                                                                  |                                |                                                                 |
| ug5017     | 187                  |                                                                              |                                                                                                  |                                |                                                                 |
| ug5018     | 256                  |                                                                              |                                                                                                  |                                |                                                                 |
| ug5019     | 249                  |                                                                              |                                                                                                  |                                |                                                                 |
| ug5020     | 731                  | GO:0016020,GO:0005737,GO:0009987,GO:0                                        | cellular process,transport                                                                       | membrane,cytoplasm             |                                                                 |
| ug5021     | 359                  |                                                                              |                                                                                                  |                                |                                                                 |
| ug5022     | 357                  | GO:0000166                                                                   |                                                                                                  |                                | nucleotide binding                                              |
| ug5023     | 217                  |                                                                              |                                                                                                  |                                |                                                                 |
| ug5024     | 615                  |                                                                              |                                                                                                  |                                |                                                                 |
| ug5025     | 106                  |                                                                              |                                                                                                  |                                |                                                                 |
| ug5026     | 569                  | GO:0005886,GO:0005                                                           |                                                                                                  | plasma membrane                | binding                                                         |
| ug5027     | 438                  |                                                                              |                                                                                                  |                                |                                                                 |
| ug5028     | 104                  |                                                                              |                                                                                                  |                                |                                                                 |
|            |                      | GO:0005773,GO:0016787,GO:0009056,GO:0006629,GO:0009987,G                     | catabolic process,lipid metabolic<br>process,cellular process                                    | vacuole                        | hydrolase activity,binding                                      |
| ug5029     | 737                  |                                                                              |                                                                                                  |                                |                                                                 |
| ug5030     | 334                  |                                                                              |                                                                                                  |                                |                                                                 |
| ug5031     | 374                  |                                                                              |                                                                                                  |                                |                                                                 |
| ug5032     | 223                  |                                                                              |                                                                                                  |                                |                                                                 |
|            |                      | GO:0016740,GO:0009058,GO:0009987,GO:0006629,GO:0005886                       | biosynthetic process,cellular<br>process,lipid metabolic process                                 | plasma membrane                | transferase activity                                            |
| ug5033     | 804                  |                                                                              |                                                                                                  |                                |                                                                 |
| ug5034     | 566                  |                                                                              |                                                                                                  |                                |                                                                 |
| ug5035     | 510                  |                                                                              |                                                                                                  |                                |                                                                 |
| ug5036     | 869                  |                                                                              |                                                                                                  |                                |                                                                 |
| ug5037     | 146                  |                                                                              |                                                                                                  |                                |                                                                 |
| ug5038     | 158                  |                                                                              |                                                                                                  |                                |                                                                 |
|            |                      | GO:0003824,GO:0005488,GO:0005618                                             |                                                                                                  | cell wall                      | catalytic activity,binding                                      |
| ug5039     | 779                  |                                                                              |                                                                                                  |                                |                                                                 |
| ug5040     | 693                  |                                                                              |                                                                                                  |                                |                                                                 |
| ug5041     | 813                  |                                                                              |                                                                                                  |                                |                                                                 |
| ug5042     | 916                  |                                                                              |                                                                                                  |                                |                                                                 |
| ug5043     | 909                  | GO:0000166,GO:0003                                                           |                                                                                                  |                                | nucleotide binding,RNA                                          |
| ug5044     | 775                  |                                                                              |                                                                                                  |                                |                                                                 |
| ug5045     | 671                  | GO:0005623,GO:0009                                                           | response to biotic stimulus                                                                      | cell                           |                                                                 |
| ug5046     | 347                  |                                                                              |                                                                                                  |                                |                                                                 |
| ug5047     | 278                  |                                                                              |                                                                                                  |                                |                                                                 |
| ug5048     | 876                  |                                                                              |                                                                                                  |                                |                                                                 |
| ug5049     | 366                  |                                                                              |                                                                                                  |                                |                                                                 |
| ug5050     | 206                  |                                                                              |                                                                                                  |                                |                                                                 |
| ug5051     | 365                  |                                                                              |                                                                                                  |                                |                                                                 |
| ug5052     | 612                  |                                                                              |                                                                                                  |                                |                                                                 |
| ug5053     | 654                  |                                                                              |                                                                                                  |                                |                                                                 |
|            |                      | GO:0005737,GO:0007165,GO:0009719,GO:0                                        | signal transduction,response to<br>endogenous stimulus                                           | cytoplasm,nucleus              |                                                                 |
| ug5054     | 889                  |                                                                              |                                                                                                  |                                |                                                                 |
| ug5055     | 681                  | GO:0005739                                                                   |                                                                                                  | mitochondrion                  |                                                                 |
|            |                      | GO:0005623,GO:0005488,GO:0008152,GO:0003824,GO:0003674,G                     | metabolic process                                                                                | cell                           | binding,catalytic<br>activity,molecular_function,oxygen binding |
| ug5056     | 249                  |                                                                              |                                                                                                  |                                |                                                                 |
| ug5057     | 716                  |                                                                              |                                                                                                  |                                |                                                                 |
| ug5058     | 623                  |                                                                              |                                                                                                  |                                |                                                                 |
|            |                      | GO:0006810,GO:0000166,GO:0007165                                             | transport,signal transduction                                                                    |                                | nucleotide binding                                              |
| ug5059     | 378                  |                                                                              |                                                                                                  |                                |                                                                 |
|            |                      | GO:0006139,GO:0009058,GO:0016301,GO:0000166,GO:0005739                       | nucleobase, nucleoside, nucleotide<br>and nucleic acid metabolic<br>process,biosynthetic process | mitochondrion                  | kinase activity,nucleotide<br>binding                           |
| ug5060     | 770                  |                                                                              |                                                                                                  |                                |                                                                 |
|            |                      | GO:0005488,GO:0003824,GO:0006810,GO:0008152,GO:0016020,G                     | transport,metabolic process                                                                      | membrane,plastid,thylakoid     | binding,catalytic activity                                      |
| ug5061     | 891                  |                                                                              |                                                                                                  |                                |                                                                 |
|            |                      | O:0009536,GO:000957                                                          |                                                                                                  |                                |                                                                 |

| Unigene ID | sequence length (bp) | GO-ID                                                                                          | Biological process                                                                                                                                  | Cellular component                                       | Molecular function                           |
|------------|----------------------|------------------------------------------------------------------------------------------------|-----------------------------------------------------------------------------------------------------------------------------------------------------|----------------------------------------------------------|----------------------------------------------|
| ug5062     | 576                  |                                                                                                |                                                                                                                                                     |                                                          |                                              |
| ug5063     | 412                  |                                                                                                |                                                                                                                                                     |                                                          |                                              |
| ug5064     | 223                  |                                                                                                |                                                                                                                                                     |                                                          |                                              |
| ug5065     | 472                  |                                                                                                |                                                                                                                                                     |                                                          |                                              |
| ug5066     | 197                  | GO:0005215,GO:0006                                                                             | transport                                                                                                                                           |                                                          | transporter activity                         |
| ug5067     | 141                  |                                                                                                |                                                                                                                                                     |                                                          |                                              |
| ug5068     | 206                  |                                                                                                |                                                                                                                                                     |                                                          |                                              |
| ug5069     | 166                  |                                                                                                |                                                                                                                                                     |                                                          |                                              |
| ug5070     | 465                  | GO:0005856,GO:0003774,GO:0009987                                                               | cellular process                                                                                                                                    | cytoskeleton                                             | motor activity                               |
| ug5071     | 811                  | GO:0016020,GO:0005739,GO:0005488,GO:0006810,GO:0005215                                         | transport                                                                                                                                           | membrane,mitochondrion                                   | binding,transporter activity                 |
| ug5072     | 458                  |                                                                                                |                                                                                                                                                     |                                                          |                                              |
| ug5073     | 831                  | GO:0005618,GO:0006950,GO:0009628,GO:0005886,GO:0016020,GO:0005783,GO:0009058,GO:0006464,GO:000 | response to stress,response to abiotic stimulus,biosynthetic process,protein modification process,carbohydrate metabolic process                    | cell wall,plasma membrane,membrane,endoplasmic reticulum | transferase activity                         |
| ug5074     | 433                  |                                                                                                |                                                                                                                                                     |                                                          |                                              |
| ug5075     | 894                  | GO:0016020,GO:0005622,GO:0005215,GO:0005739,GO:0006810,GO:0009058,GO:0006091,GO:0006139,GO:001 | transport,biosynthetic process,generation of precursor metabolites and energy,nucleobase, nucleoside, nucleotide and nucleic acid metabolic process | membrane,intracellular,mitochondrion                     | transporter activity,hydrolase activity      |
| ug5076     | 864                  |                                                                                                |                                                                                                                                                     |                                                          |                                              |
| ug5077     | 697                  | GO:0003676,GO:0016                                                                             |                                                                                                                                                     | membrane                                                 | nucleic acid binding                         |
| ug5078     | 726                  |                                                                                                |                                                                                                                                                     |                                                          |                                              |
| ug5079     | 857                  |                                                                                                |                                                                                                                                                     |                                                          |                                              |
| ug5080     | 259                  |                                                                                                |                                                                                                                                                     |                                                          |                                              |
| ug5081     | 816                  | GO:0019538,GO:0009987,GO:0005515                                                               | protein metabolic process,cellular process                                                                                                          |                                                          | protein binding                              |
| ug5082     | 672                  | GO:0003723,GO:0006139,GO:0016740                                                               | nucleobase, nucleoside, nucleotide and nucleic acid metabolic process                                                                               |                                                          | RNA binding,transferase activity             |
| ug5083     | 133                  |                                                                                                |                                                                                                                                                     |                                                          |                                              |
| ug5084     | 833                  |                                                                                                |                                                                                                                                                     |                                                          |                                              |
| ug5085     | 114                  |                                                                                                |                                                                                                                                                     |                                                          |                                              |
| ug5086     | 625                  | GO:0005488,GO:0005                                                                             |                                                                                                                                                     | intracellular                                            | binding                                      |
| ug5087     | 527                  |                                                                                                |                                                                                                                                                     |                                                          |                                              |
| ug5088     | 581                  |                                                                                                |                                                                                                                                                     |                                                          |                                              |
| ug5089     | 401                  | GO:0005840,GO:0005198,GO:0009987,GO:0009536,GO:0006412,GO                                      | cellular process,translation                                                                                                                        | ribosome,plastid                                         | structural molecule activity,RNA binding     |
| ug5090     | 104                  |                                                                                                |                                                                                                                                                     |                                                          |                                              |
| ug5091     | 225                  |                                                                                                |                                                                                                                                                     |                                                          |                                              |
| ug5092     | 658                  |                                                                                                |                                                                                                                                                     |                                                          |                                              |
| ug5093     | 615                  | GO:0016020,GO:0009058,GO:0006629,GO:0                                                          | biosynthetic process,lipid metabolic process                                                                                                        | membrane                                                 | transferase activity                         |
| ug5094     | 582                  |                                                                                                |                                                                                                                                                     |                                                          |                                              |
| ug5095     | 716                  | GO:0016020,GO:0005215,GO:0006810,GO:0009987,GO:0009835                                         | transport,cellular process,ripening                                                                                                                 | membrane                                                 | transporter activity                         |
| ug5096     | 107                  |                                                                                                |                                                                                                                                                     |                                                          |                                              |
| ug5097     | 916                  |                                                                                                |                                                                                                                                                     |                                                          |                                              |
| ug5098     | 399                  |                                                                                                |                                                                                                                                                     |                                                          |                                              |
| ug5099     | 133                  |                                                                                                |                                                                                                                                                     |                                                          |                                              |
| ug5100     | 454                  |                                                                                                |                                                                                                                                                     |                                                          |                                              |
| ug5101     | 466                  | GO:0016740,GO:0005515,GO:0009058,GO:0005975,GO:0009987,GO:0016020,GO:000548                    | biosynthetic process,carbohydrate metabolic process,cellular process                                                                                | membrane                                                 | transferase activity,protein binding,binding |
| ug5102     | 254                  |                                                                                                |                                                                                                                                                     |                                                          |                                              |
| ug5103     | 513                  |                                                                                                |                                                                                                                                                     |                                                          |                                              |
| ug5104     | 596                  |                                                                                                |                                                                                                                                                     |                                                          |                                              |
| ug5105     | 738                  | GO:0016020                                                                                     |                                                                                                                                                     | membrane                                                 |                                              |
| ug5106     | 524                  |                                                                                                |                                                                                                                                                     |                                                          |                                              |
| ug5107     | 380                  |                                                                                                |                                                                                                                                                     |                                                          |                                              |
| ug5108     | 105                  |                                                                                                |                                                                                                                                                     |                                                          |                                              |
| ug5109     | 218                  |                                                                                                |                                                                                                                                                     |                                                          |                                              |
| ug5110     | 150                  |                                                                                                |                                                                                                                                                     |                                                          |                                              |
| ug5111     | 110                  |                                                                                                |                                                                                                                                                     |                                                          |                                              |
| ug5112     | 819                  | GO:0005739                                                                                     |                                                                                                                                                     | mitochondrion                                            |                                              |
| ug5113     | 928                  | GO:0008152,GO:0019538,GO:0003824                                                               | metabolic process,protein metabolic process                                                                                                         |                                                          | catalytic activity                           |
| ug5114     | 830                  |                                                                                                |                                                                                                                                                     |                                                          |                                              |
| ug5115     | 451                  |                                                                                                |                                                                                                                                                     |                                                          |                                              |
| ug5116     | 134                  |                                                                                                |                                                                                                                                                     |                                                          |                                              |
| ug5117     | 351                  |                                                                                                |                                                                                                                                                     |                                                          |                                              |
| ug5118     | 898                  |                                                                                                |                                                                                                                                                     |                                                          |                                              |
| ug5119     | 456                  |                                                                                                |                                                                                                                                                     |                                                          |                                              |

| Unigene ID | sequence length (bp) | GO-ID                                                                                          | Biological process                                                                                                         | Cellular component                       | Molecular function                    |
|------------|----------------------|------------------------------------------------------------------------------------------------|----------------------------------------------------------------------------------------------------------------------------|------------------------------------------|---------------------------------------|
| ug5120     | 774                  | GO:0009536                                                                                     |                                                                                                                            | plastid                                  |                                       |
| ug5121     | 697                  | GO:0019538,GO:000987,GO:0005829,GO:0                                                           | protein metabolic process,cellular process                                                                                 | cytosol                                  | protein binding                       |
| ug5122     | 578                  | GO:0005488                                                                                     |                                                                                                                            |                                          | binding                               |
| ug5123     | 226                  |                                                                                                |                                                                                                                            |                                          |                                       |
| ug5124     | 194                  | GO:0016301,GO:0030246                                                                          |                                                                                                                            |                                          | kinase activity,carbohydrate binding  |
| ug5125     | 784                  |                                                                                                |                                                                                                                            |                                          |                                       |
| ug5126     | 268                  |                                                                                                |                                                                                                                            |                                          |                                       |
| ug5127     | 689                  | GO:0005615                                                                                     |                                                                                                                            | extracellular space                      |                                       |
| ug5128     | 690                  |                                                                                                |                                                                                                                            |                                          |                                       |
| ug5129     | 312                  |                                                                                                |                                                                                                                            |                                          |                                       |
| ug5130     | 417                  |                                                                                                |                                                                                                                            |                                          |                                       |
| ug5131     | 405                  | GO:0006464,GO:0000166,GO:0016301,GO:0016787,GO:0005                                            | protein modification process                                                                                               |                                          | nucleotide binding,kinase activity    |
| ug5132     | 682                  | 618,GO:0005840,GO:0005975,GO:0005488,G                                                         | carbohydrate metabolic process                                                                                             | cell wall,ribosome,cytoplasm             | hydrolase activity,binding            |
| ug5133     | 597                  |                                                                                                |                                                                                                                            |                                          |                                       |
| ug5134     | 223                  |                                                                                                |                                                                                                                            |                                          |                                       |
| ug5135     | 894                  | GO:0005488,GO:0008152,GO:0003824,GO:0006950,GO:0009987,GO:0003674,GO:0019                      | metabolic process,response to stress,cellular process                                                                      | plastid                                  | binding,catalytic activity            |
| ug5136     | 912                  | 725,GO:0003824,GO:0016020,GO:0009536,GO:0009579,GO:000573                                      | cellular homeostasis                                                                                                       | membrane,plastid,thylakoid,mitochondrion | molecular_function,catalytic activity |
| ug5137     | 329                  |                                                                                                |                                                                                                                            |                                          |                                       |
| ug5138     | 846                  | GO:0005515                                                                                     |                                                                                                                            |                                          | protein binding                       |
| ug5139     | 877                  |                                                                                                |                                                                                                                            |                                          |                                       |
| ug5140     | 611                  | GO:0005622,GO:0019538,GO:0009056,GO:0009987,GO:0000003,GO:0009791,GO:0009790,GO:0005488,GO:000 | protein metabolic process,catabolic process,cellular process,reproduction,post-embryonic development,embryonic development | intracellular,cytosol                    | binding                               |
| ug5141     | 393                  |                                                                                                |                                                                                                                            |                                          |                                       |
| ug5142     | 258                  |                                                                                                |                                                                                                                            |                                          |                                       |
| ug5143     | 277                  |                                                                                                |                                                                                                                            |                                          |                                       |
| ug5144     | 248                  |                                                                                                |                                                                                                                            |                                          |                                       |
| ug5145     | 793                  | GO:0016020                                                                                     |                                                                                                                            | membrane                                 |                                       |
| ug5146     | 210                  |                                                                                                |                                                                                                                            |                                          |                                       |
| ug5147     | 271                  |                                                                                                |                                                                                                                            |                                          |                                       |
| ug5148     | 147                  |                                                                                                |                                                                                                                            |                                          |                                       |
| ug5149     | 142                  |                                                                                                |                                                                                                                            |                                          |                                       |
| ug5150     | 589                  |                                                                                                |                                                                                                                            |                                          |                                       |
| ug5151     | 171                  |                                                                                                |                                                                                                                            |                                          |                                       |
| ug5152     | 166                  |                                                                                                |                                                                                                                            |                                          |                                       |
| ug5153     | 477                  |                                                                                                |                                                                                                                            |                                          |                                       |
| ug5154     | 154                  |                                                                                                |                                                                                                                            |                                          |                                       |
| ug5155     | 409                  | GO:0005623                                                                                     |                                                                                                                            | cell                                     |                                       |
| ug5156     | 713                  |                                                                                                |                                                                                                                            |                                          |                                       |
| ug5157     | 143                  |                                                                                                |                                                                                                                            |                                          |                                       |
| ug5158     | 419                  |                                                                                                |                                                                                                                            |                                          |                                       |
| ug5159     | 371                  |                                                                                                |                                                                                                                            |                                          |                                       |
| ug5160     | 209                  |                                                                                                |                                                                                                                            |                                          |                                       |
| ug5161     | 371                  |                                                                                                |                                                                                                                            |                                          |                                       |
| ug5162     | 531                  |                                                                                                |                                                                                                                            |                                          |                                       |
| ug5163     | 420                  |                                                                                                |                                                                                                                            |                                          |                                       |
| ug5164     | 305                  | GO:0005576,GO:0007267,GO:0004871                                                               | cell-cell signaling                                                                                                        | extracellular region                     | signal transducer activity            |
| ug5165     | 134                  |                                                                                                |                                                                                                                            |                                          |                                       |
| ug5166     | 375                  |                                                                                                |                                                                                                                            |                                          |                                       |
| ug5167     | 900                  | GO:0008152,GO:0016                                                                             | metabolic process                                                                                                          |                                          | hydrolase activity                    |
| ug5168     | 413                  |                                                                                                |                                                                                                                            |                                          |                                       |
| ug5169     | 101                  |                                                                                                |                                                                                                                            |                                          |                                       |
| ug5170     | 362                  |                                                                                                |                                                                                                                            |                                          |                                       |
| ug5171     | 391                  |                                                                                                |                                                                                                                            |                                          |                                       |
| ug5172     | 267                  |                                                                                                |                                                                                                                            |                                          |                                       |
| ug5173     | 207                  |                                                                                                |                                                                                                                            |                                          |                                       |
| ug5174     | 628                  | GO:0009536,GO:0003                                                                             |                                                                                                                            | plastid                                  | catalytic activity                    |
| ug5175     | 396                  |                                                                                                |                                                                                                                            |                                          |                                       |
| ug5176     | 101                  |                                                                                                |                                                                                                                            |                                          |                                       |
| ug5177     | 411                  |                                                                                                |                                                                                                                            |                                          |                                       |
| ug5178     | 144                  |                                                                                                |                                                                                                                            |                                          |                                       |
| ug5179     | 820                  |                                                                                                |                                                                                                                            |                                          |                                       |

| Unigene ID | sequence length (bp) | GO-ID                                                                                                                                                                                                | Biological process                                                                                                                | Cellular component             | Molecular function                                         |
|------------|----------------------|------------------------------------------------------------------------------------------------------------------------------------------------------------------------------------------------------|-----------------------------------------------------------------------------------------------------------------------------------|--------------------------------|------------------------------------------------------------|
| ug5180     | 913                  | GO:0006950,GO:0009607,GO:0008150,GO:0005488,GO:0009536,GO:0016787,GO:0009579,GO:0016020,GO:0008152,GO:0009987,GO:0008150,GO:0005488,GO:0005886,GO:0016043,GO:0007049,GO:0016049,GO:0008152,GO:000585 | response to stress,response to biotic stimulus,biological_process,metabolic process,cellular process,response to abiotic stimulus | plastid,thylakoid,membrane     | binding,hydrolase activity                                 |
| ug5181     | 874                  | GO:0008150,GO:0005488,GO:0005886,GO:0016043,GO:0007049,GO:0016049,GO:0008152,GO:000585                                                                                                               | biological_process                                                                                                                |                                | binding                                                    |
| ug5182     | 496                  | GO:0008150,GO:0005488,GO:0005886,GO:0016043,GO:0007049,GO:0016049,GO:0008152,GO:000585                                                                                                               | cellular component organization,cell cycle,cell growth,metabolic process                                                          | plasma membrane,cytoskeleton   | binding                                                    |
| ug5183     | 412                  |                                                                                                                                                                                                      |                                                                                                                                   |                                |                                                            |
| ug5184     | 701                  | GO:0005198,GO:0003723,GO:0005840,GO:0009536,GO:0006412                                                                                                                                               | translation                                                                                                                       | ribosome,plastid               | structural molecule activity,RNA binding                   |
| ug5185     | 121                  |                                                                                                                                                                                                      |                                                                                                                                   |                                |                                                            |
| ug5186     | 867                  | GO:0009058,GO:0006519,GO:0003824                                                                                                                                                                     | biosynthetic process,cellular amino acid and derivative metabolic                                                                 |                                | catalytic activity                                         |
| ug5187     | 794                  |                                                                                                                                                                                                      |                                                                                                                                   |                                |                                                            |
| ug5188     | 893                  | GO:0008152,GO:0006091,GO:0009056,GO:0003824,GO:0005739                                                                                                                                               | metabolic process,generation of precursor metabolites and energy,catabolic process                                                | mitochondrion                  | catalytic activity                                         |
| ug5189     | 594                  |                                                                                                                                                                                                      |                                                                                                                                   |                                |                                                            |
| ug5190     | 179                  |                                                                                                                                                                                                      |                                                                                                                                   |                                |                                                            |
| ug5191     | 602                  | GO:0005515,GO:0005215,GO:0000166,GO:0016020,GO:0009536,GO:0006810,GO:0009987,GO:0009536,GO:0016787,GO:0016043,GO:0009987,GO:0019538,GO:0009056,GO:001602                                             | transport,cellular process                                                                                                        | membrane,plastid,mitochondrion | protein binding,transporter activity,nucleotide binding    |
| ug5192     | 844                  | GO:0009536,GO:0016787,GO:0016043,GO:0009987,GO:0019538,GO:0009056,GO:001602                                                                                                                          | cellular component organization,cellular process,protein metabolic process,catabolic process                                      | plastid,membrane,thylakoid     | hydrolase activity                                         |
| ug5193     | 135                  |                                                                                                                                                                                                      |                                                                                                                                   |                                |                                                            |
| ug5194     | 223                  |                                                                                                                                                                                                      |                                                                                                                                   |                                |                                                            |
| ug5195     | 599                  |                                                                                                                                                                                                      |                                                                                                                                   |                                |                                                            |
| ug5196     | 212                  |                                                                                                                                                                                                      |                                                                                                                                   |                                |                                                            |
| ug5197     | 900                  | GO:0005840,GO:0005198,GO:0006412                                                                                                                                                                     | translation                                                                                                                       | ribosome                       | structural molecule activity                               |
| ug5198     | 325                  |                                                                                                                                                                                                      |                                                                                                                                   |                                |                                                            |
| ug5199     | 365                  |                                                                                                                                                                                                      |                                                                                                                                   |                                |                                                            |
| ug5200     | 595                  | GO:0005488                                                                                                                                                                                           |                                                                                                                                   |                                | binding                                                    |
| ug5201     | 123                  |                                                                                                                                                                                                      |                                                                                                                                   |                                |                                                            |
| ug5202     | 414                  |                                                                                                                                                                                                      |                                                                                                                                   |                                |                                                            |
| ug5203     | 381                  | GO:0016787,GO:0006810,GO:0005215,GO:000166,GO:0016020                                                                                                                                                | transport                                                                                                                         | membrane                       | hydrolase activity,transporter activity,nucleotide binding |
| ug5204     | 189                  |                                                                                                                                                                                                      |                                                                                                                                   |                                |                                                            |
| ug5205     | 110                  |                                                                                                                                                                                                      |                                                                                                                                   |                                |                                                            |
| ug5206     | 361                  | GO:0005515,GO:0005215,GO:0000166,GO:0016020,GO:0009536,GO:0006810,GO:0009987,GO:0003824,GO:0005488,GO:0006139,GO:0006412,GO:0006519,GO:0009536                                                       | transport,cellular process                                                                                                        | membrane,plastid               | protein binding,transporter activity,nucleotide binding    |
| ug5207     | 391                  | GO:0003824,GO:0005488,GO:0006139,GO:0006412,GO:0006519,GO:0009536                                                                                                                                    | nucleobase, nucleoside, nucleotide and nucleic acid metabolic process,translation,cellular amino acid and derivative metabolic    | plastid                        | catalytic activity,binding                                 |
| ug5208     | 336                  | GO:0003723,GO:0006139,GO:0004518,GO:0005488                                                                                                                                                          | nucleobase, nucleoside, nucleotide and nucleic acid metabolic process                                                             | intracellular                  | RNA binding,nuclease activity                              |
| ug5209     | 138                  |                                                                                                                                                                                                      |                                                                                                                                   |                                |                                                            |
| ug5210     | 126                  |                                                                                                                                                                                                      |                                                                                                                                   |                                |                                                            |
| ug5211     | 177                  |                                                                                                                                                                                                      |                                                                                                                                   |                                |                                                            |
| ug5212     | 312                  |                                                                                                                                                                                                      |                                                                                                                                   |                                |                                                            |
| ug5213     | 249                  |                                                                                                                                                                                                      |                                                                                                                                   |                                |                                                            |
| ug5214     | 408                  |                                                                                                                                                                                                      |                                                                                                                                   |                                |                                                            |
| ug5215     | 486                  |                                                                                                                                                                                                      |                                                                                                                                   |                                |                                                            |
| ug5216     | 807                  |                                                                                                                                                                                                      |                                                                                                                                   |                                |                                                            |
| ug5217     | 101                  |                                                                                                                                                                                                      |                                                                                                                                   |                                |                                                            |
| ug5218     | 263                  | GO:0009058,GO:0005975,GO:0015979,GO:0003824,GO:0008152,GO:0009536                                                                                                                                    | biosynthetic process,carbohydrate metabolic process,photosynthesis,metabolic process                                              | plastid                        | catalytic activity                                         |
| ug5219     | 619                  | GO:0016787,GO:0005488                                                                                                                                                                                |                                                                                                                                   | peroxisome                     | hydrolase activity                                         |
| ug5220     | 381                  | GO:0009536                                                                                                                                                                                           |                                                                                                                                   | plastid                        |                                                            |
| ug5221     | 537                  | GO:0009607,GO:0009605,GO:0006950,GO:0005488                                                                                                                                                          | response to biotic stimulus,response to external                                                                                  | plastid                        |                                                            |
| ug5222     | 341                  |                                                                                                                                                                                                      |                                                                                                                                   |                                |                                                            |
| ug5223     | 359                  |                                                                                                                                                                                                      |                                                                                                                                   |                                |                                                            |
| ug5224     | 385                  |                                                                                                                                                                                                      |                                                                                                                                   |                                |                                                            |
| ug5225     | 595                  |                                                                                                                                                                                                      |                                                                                                                                   |                                |                                                            |
| ug5226     | 148                  |                                                                                                                                                                                                      |                                                                                                                                   |                                |                                                            |

| Unigene ID | sequence length (bp) | GO-ID                                                                                   | Biological process                                                                                                    | Cellular component     | Molecular function                            |
|------------|----------------------|-----------------------------------------------------------------------------------------|-----------------------------------------------------------------------------------------------------------------------|------------------------|-----------------------------------------------|
| ug5227     | 132                  |                                                                                         |                                                                                                                       |                        |                                               |
| ug5228     | 548                  | GO:0005515                                                                              |                                                                                                                       |                        | protein binding                               |
| ug5229     | 589                  |                                                                                         |                                                                                                                       |                        |                                               |
| ug5230     | 669                  |                                                                                         |                                                                                                                       |                        |                                               |
| ug5231     | 772                  | GO:0005739,GO:0005                                                                      |                                                                                                                       | mitochondrion          | binding                                       |
| ug5232     | 755                  | GO:0016020,GO:0005                                                                      | transport                                                                                                             | membrane,mitochondrion | transporter activity                          |
| ug5233     | 258                  |                                                                                         |                                                                                                                       |                        |                                               |
| ug5234     | 470                  | GO:0003824,GO:0005<br>488,GO:0008152,GO:0<br>005576,GO:0009056,G<br>O:0006519,GO:001974 | metabolic process,catabolic<br>process,cellular amino acid and<br>derivative metabolic<br>process,secondary metabolic | extracellular region   | catalytic activity,binding                    |
| ug5235     | 192                  |                                                                                         |                                                                                                                       |                        |                                               |
| ug5236     | 485                  |                                                                                         |                                                                                                                       |                        |                                               |
| ug5237     | 166                  |                                                                                         |                                                                                                                       |                        |                                               |
| ug5238     | 475                  |                                                                                         |                                                                                                                       |                        |                                               |
| ug5239     | 623                  |                                                                                         |                                                                                                                       |                        |                                               |
| ug5240     | 518                  | GO:0005739                                                                              |                                                                                                                       | mitochondrion          |                                               |
| ug5241     | 119                  |                                                                                         |                                                                                                                       |                        |                                               |
| ug5242     | 114                  |                                                                                         |                                                                                                                       |                        |                                               |
| ug5243     | 105                  |                                                                                         |                                                                                                                       |                        |                                               |
| ug5244     | 150                  |                                                                                         |                                                                                                                       |                        |                                               |
| ug5245     | 142                  |                                                                                         |                                                                                                                       |                        |                                               |
| ug5246     | 908                  |                                                                                         |                                                                                                                       |                        |                                               |
| ug5247     | 369                  | GO:0003824                                                                              |                                                                                                                       |                        | catalytic activity                            |
| ug5248     | 171                  |                                                                                         |                                                                                                                       |                        |                                               |
| ug5249     | 306                  |                                                                                         |                                                                                                                       |                        |                                               |
| ug5250     | 170                  |                                                                                         |                                                                                                                       |                        |                                               |
| ug5251     | 120                  |                                                                                         |                                                                                                                       |                        |                                               |
| ug5252     | 651                  | GO:0019538,GO:0009<br>987,GO:0009579,GO:0<br>009536,GO:0005488,G<br>O:0005515,GO:000382 | protein metabolic process,cellular<br>process                                                                         | thylakoid,plastid      | binding,protein<br>binding,catalytic activity |
| ug5253     | 417                  |                                                                                         |                                                                                                                       |                        |                                               |
| ug5254     | 691                  | GO:0005515                                                                              |                                                                                                                       |                        | protein binding                               |
| ug5255     | 624                  |                                                                                         |                                                                                                                       |                        |                                               |
| ug5256     | 823                  |                                                                                         |                                                                                                                       |                        |                                               |
| ug5257     | 739                  |                                                                                         |                                                                                                                       |                        |                                               |
| ug5258     | 177                  |                                                                                         |                                                                                                                       |                        |                                               |
| ug5259     | 100                  |                                                                                         |                                                                                                                       |                        |                                               |
| ug5260     | 105                  |                                                                                         |                                                                                                                       |                        |                                               |
| ug5261     | 432                  | GO:0003824,GO:0008<br>152,GO:0000166                                                    | metabolic process                                                                                                     |                        | catalytic activity,nucleotide<br>binding      |
| ug5262     | 678                  |                                                                                         |                                                                                                                       |                        |                                               |
