# Supplementary material for: Expressed sequence tags from organ-specific cDNA libraries of tea (Camellia sinensis) and polymorphisms and transferability of EST-SSRs across Camellia species
Source: PubMed Central journal article supplement — Breed Sci. 2012 Jun 19;62(2):186–95. doi: 10.1270/jsbbs.62.186 (PMC3405963; doi:10.1270/jsbbs.62.186), 2012-06-19
Supplement: 62_186_2.pdf [file 62_186_2.pdf]

**Supplemental Table 2.** Unigenes showing differential expression in the seven organs

| Cluster | Unigene | Annotation                                    | GO terms                                                                                                                                                                                                                                                           |
|---------|---------|-----------------------------------------------|--------------------------------------------------------------------------------------------------------------------------------------------------------------------------------------------------------------------------------------------------------------------|
| Ia      | ug2071  | chlorophyll a/b binding                       | membrane;plastid;generation of precursor metabolites and energy;photosynthesis                                                                                                                                                                                     |
| Ia      | ug2085  | chlorophyll a/b binding protein               | generation of precursor metabolites and energy;photosynthesis;membrane;thylakoid;binding;protein modification process;plastid                                                                                                                                      |
| Ia      | ug2001  | light-harvesting complex II protein Lhcb3     | membrane;plastid;generation of precursor metabolites and energy;photosynthesis                                                                                                                                                                                     |
| Ia      | ug2083  | serine hydroxymethyltransferase               | binding;cellular amino acid and derivative metabolic process;transferase activity;metabolic process;cellular process                                                                                                                                               |
| Ia      | ug2087  | alpha tubulin 1                               | cellular process;C;nucleotide binding;cellular component organization;structural molecule activity;hydrolase activity;cytoskeleton                                                                                                                                 |
| Ia      | ug1989  | no annotation                                 |                                                                                                                                                                                                                                                                    |
| Ia      | ug2024  | photosystem II protein Z                      | membrane;thylakoid;generation of precursor metabolites and energy;photosynthesis;plastid                                                                                                                                                                           |
| Ia      | ug2050  | no annotation                                 |                                                                                                                                                                                                                                                                    |
| Ia      | ug2058  | chlorophyll a/b binding                       | membrane;plastid;generation of precursor metabolites and energy;photosynthesis                                                                                                                                                                                     |
| Ia      | ug2054  | photosystem II 10 kDa                         | membrane;thylakoid;plastid;photosynthesis                                                                                                                                                                                                                          |
| Ib      | ug2033  | no annotation                                 |                                                                                                                                                                                                                                                                    |
| Ib      | ug2067  | metallothionein-like protein                  | binding                                                                                                                                                                                                                                                            |
| Ib      | ug2066  | non-specific lipid transfer protein precursor | lipid binding;transport                                                                                                                                                                                                                                            |
| Ib      | ug2080  | non-specific lipid transfer protein precursor | lipid binding;transport                                                                                                                                                                                                                                            |
| Ib      | ug2006  | unknown protein                               | cytoplasm;plastid                                                                                                                                                                                                                                                  |
| Ib      | ug2007  | no annotation                                 |                                                                                                                                                                                                                                                                    |
| Ic      | ug2061  | photosystem II CP43 protein                   | thylakoid;plastid;membrane;generation of precursor metabolites and energy;photosynthesis;intracellular;F;protein modification process;binding                                                                                                                      |
| Ic      | ug2091  | hypothetical ctc00065-like protein            | mitochondrion;plastid                                                                                                                                                                                                                                              |
| Ic      | ug2064  | photosystem I reaction center                 | membrane;thylakoid;plastid;photosynthesis                                                                                                                                                                                                                          |
| Ic      | ug2089  | no annotation                                 |                                                                                                                                                                                                                                                                    |
| Ic      | ug2090  | histone H3                                    | intracellular;DNA binding;cellular component organization;cellular process;plastid;nucleus                                                                                                                                                                         |
| Id      | ug2018  | unknown protein [Camellia]                    |                                                                                                                                                                                                                                                                    |
| Id      | ug2021  | extensin like protein                         | transport                                                                                                                                                                                                                                                          |
| Id      | ug2002  | unknown protein [Camellia]                    |                                                                                                                                                                                                                                                                    |
| Id      | ug2079  | histone H4                                    | intracellular;DNA binding;cellular component organization;cellular process;protein                                                                                                                                                                                 |
| Id      | ug2029  | PREDICTED: hypothetical protein               |                                                                                                                                                                                                                                                                    |
| Id      | ug2082  | histone H4                                    | intracellular;DNA binding;cellular component organization;cellular process;protein                                                                                                                                                                                 |
| Id      | ug1961  | histone H3                                    | intracellular;DNA binding;cellular component organization;cellular process;plastid;nucleus                                                                                                                                                                         |
| II      | ug2055  | lipid binding                                 | transport                                                                                                                                                                                                                                                          |
| II      | ug2060  | unknown protein                               |                                                                                                                                                                                                                                                                    |
| II      | ug2015  | no annotation                                 |                                                                                                                                                                                                                                                                    |
| II      | ug2084  | no annotation                                 |                                                                                                                                                                                                                                                                    |
| II      | ug2078  | dihydroflavonol 4-reductase                   | metabolic process;cellular process;binding;catalytic activity                                                                                                                                                                                                      |
| II      | ug2092  | cell wall-associated hydrolase                | kinase activity;hydrolase activity<br>vacuole;transport;generation of precursor metabolites and energy;nucleobase, nucleoside, nucleotide and nucleic acid metabolic process;biosynthetic process;membrane;hydrolase activity;transporter activity;plasma membrane |
| II      | ug2074  | H <sup>+</sup> -transporting two-sector       | activity;transporter activity;plasma membrane                                                                                                                                                                                                                      |
| II      | ug2093  | unknown protein                               | binding                                                                                                                                                                                                                                                            |
| II      | ug2088  | unknown protein                               | metabolic process;catalytic activity                                                                                                                                                                                                                               |
| II      | ug2065  | specific tissue protein 2                     |                                                                                                                                                                                                                                                                    |
| II      | ug2075  | organ-specific protein                        |                                                                                                                                                                                                                                                                    |

**Supplemental Table 2.** continued.

| Cluster | Unigene | Annotation                                                           | GO terms                                                                                                                                                                                                                              |
|---------|---------|----------------------------------------------------------------------|---------------------------------------------------------------------------------------------------------------------------------------------------------------------------------------------------------------------------------------|
| III     | ug1784  | unknown protein                                                      | binding;catalytic activity                                                                                                                                                                                                            |
| III     | ug1016  | 40S ribosomal protein S5                                             | structural molecule activity;ribosome;translation<br>hydrolase activity;biosynthetic process;cellular process;lipid                                                                                                                   |
| III     | ug1854  | isopentenyl diphosphate isomerase                                    | metabolic process;catalytic activity                                                                                                                                                                                                  |
| III     | ug2039  | manganese superoxide dismutase                                       | binding;metabolic process;response to stress;cellular<br>process;mitochondrion;catalytic activity                                                                                                                                     |
| III     | ug2076  | GEG protein                                                          | extracellular region;response to stress;cell wall<br>response to endogenous stimulus;signal                                                                                                                                           |
| III     | ug1560  | glutathione S-transferase                                            | transduction;transferase activity<br>response to endogenous stimulus;signal                                                                                                                                                           |
| III     | ug2053  | germin-like protein 6                                                | transduction;extracellular region;cell wall;receptor<br>kinase activity;response to external stimulus;signal<br>transduction;response to abiotic stimulus;biosynthetic<br>process;nucleobase, nucleoside, nucleotide and nucleic acid |
| III     | ug1822  | nucleoside diphosphate kinase                                        | metabolic process;nucleotide binding;binding                                                                                                                                                                                          |
| III     | ug2038  | PREDICTED: hypothetical protein<br>early response to dehydration 15- |                                                                                                                                                                                                                                       |
| III     | ug2072  | like protein                                                         |                                                                                                                                                                                                                                       |
| III     | ug0640  | lipid binding<br>calcium-binding EF hand family                      | structural molecule activity;transport                                                                                                                                                                                                |
| III     | ug2046  | protein                                                              | binding                                                                                                                                                                                                                               |
| III     | ug1974  | alcohol dehydrogenase                                                | catalytic activity;cytoplasm;metabolic process;binding<br>carbohydrate metabolic process;generation of precursor<br>metabolites and energy;catabolic process;catalytic activity                                                       |
| III     | ug2063  | fructose-bisphosphate aldolase                                       |                                                                                                                                                                                                                                       |
| III     | ug2020  | pathogenesis-related protein 10                                      |                                                                                                                                                                                                                                       |
| III     | ug1701  | hypothetical protein                                                 |                                                                                                                                                                                                                                       |
| III     | ug2045  | 60S ribosomal protein                                                | ribosome;structural molecule activity;translation                                                                                                                                                                                     |
| III     | ug2081  | no annotation                                                        |                                                                                                                                                                                                                                       |
| III     | ug1557  | 60S ribosomal protein 135a                                           | structural molecule activity;cellular<br>process;ribosome;cytosol;translation                                                                                                                                                         |
| III     | ug1965  | 60S acidic ribosomal protein P0                                      | ribosome;structural molecule activity;cellular<br>intracellular;DNA binding;cellular component<br>organization;cellular process;nucleus                                                                                               |
| III     | ug2056  | histone H2b                                                          |                                                                                                                                                                                                                                       |
| III     | ug2086  | no annotation                                                        |                                                                                                                                                                                                                                       |
| III     | ug2048  | peroxidase 72                                                        | binding;metabolic process;catalytic activity;F;response to stress<br>response to endogenous stimulus;signal                                                                                                                           |
| III     | ug2049  | germin-like protein 6                                                | transduction;extracellular region;cell wall;receptor                                                                                                                                                                                  |
| III     | ug2047  | no annotation                                                        |                                                                                                                                                                                                                                       |
