# Supplementary material for: Expressed sequence tags from organ-specific cDNA libraries of tea (Camellia sinensis) and polymorphisms and transferability of EST-SSRs across Camellia species
Source: PubMed Central journal article supplement — Breed Sci. 2012 Jun 19;62(2):186–95. doi: 10.1270/jsbbs.62.186 (PMC3405963; doi:10.1270/jsbbs.62.186), 2012-06-19
Supplement: 62_186_3.pdf [file 62_186_3.pdf]

**Supplemental Table 3.** List of EST-SSR markers used in this study

| marker name          | repeat region                     | fw primer for postlabel    | rv primer for postlabel      | accession no. |
|----------------------|-----------------------------------|----------------------------|------------------------------|---------------|
| MSE0019              | (ac)23(tc)12                      | accatcaaaactactctcatcccca  | gtttccacttctatgtcctttgccat   | FS951295      |
| MSE0020              | (tc)21,(ta)7                      | attcccacttgacaccaaaaccaag  | gtttctccggtcacctctatctgtcc   | FS949264      |
| MSE0021              | (tc)20(ta)10                      | accatccatccataccattcttca   | gtttatggaatgcatccaacaacaagg  | FS951578      |
| MSE0022              | (tc)19(ta)9                       | actgcagtgtagaaaagccccaat   | gtttcgatctgggagcttctggagata  | AB361048      |
| MSE0023              | (tc)13, (tc)7                     | agaaacaaccacctccctgatct    | gttttagcagcgaagaaggattcattag | AB485966      |
| MSE0024              | (ag)11                            | ataaccatcattccaaagccacaa   | gtttccgatttcgacatctctctgtct  | FS951122      |
| MSE0025              | (tc)14                            | atatactcctccctcaggctcctcc  | gtttcagcaatgaaacgaaaccagatt  | FS948413      |
| MSE0026              | (ag)7(ag)6                        | atcaccaaaggaaaccctactgg    | gtttcgcaggtggatctggagaaaatac | AB461371      |
| MSE0027              | (tc)19                            | atccctctacttcaatcgacccc    | gtttgaagggcggctactgtatggat   | FS952009      |
| MSE0028              | (tc)21                            | acaacccaaaaattcacatgatagc  | gtttcaacaacatcgtagaggcca     | FS951387      |
| MSE0029              | (ag)14, (ag)7                     | atagccaatcaagctcctcctcct   | gtttctgttcctccttgatgatg      | FS949897      |
| MSE0030              | (tc)11                            | atccaaaaccctagttcactcca    | gtttacgctctgtatcggtgaaggctac | AB461369      |
| MSE0031              | (tc)8,(tct)9                      | atgatctgaagtggaaggtttcg    | gtttcttatgagacttggcctcgc     | FS951496      |
| MSE0032              | (ac)13                            | atftccctcaaaccttctcagc     | gtttaatccctgggtctcattctgt    | FS949441      |
| MSE0033              | (tc)12                            | acaaactcaaacatctcagcgggt   | gtttcagagataatggctcgtggga    | FS951827      |
| MSE0034              | (tc)14                            | agctctctgtccgaagcttttag    | gtttcacctcaaacacacaaaac      | FS951853      |
| MSE0035              | (tc)13                            | atccttcaatctccattgacgc     | gtttcacaaaaaccccaataccctcc   | AB461372      |
| MSE0036              | (ag)11,(ag)8                      | atgtgctattgtgtgtggacc      | gtttaaaagcttggtaagatagcccc   | FS951471      |
| MSE0037              | (tc)12                            | attaccatttgcttctgtgtc      | gtttgaagcaattgggaatcagtg     | AB485967      |
| MSE0038              | (ag)8                             | attcctatgtctgagccctcatt    | gttttaggcaagctgaacatcgtct    | FS950252      |
| MSE0039              | (ag)21                            | acattctctgcaattacacatcc    | gtttcttttgtaagcggctcattgtc   | AB485968      |
| MSE0040              | (tc)18                            | actccgacgagtcagttcctaac    | gtttgtacatttgacagagcagagc    | AB485969      |
| MSE0041              | (tc)10                            | agacagtgctccatctccatctcc   | gtttacccttgatttggccacatac    | FS950273      |
| MSE0042              | (tc)16                            | agactcgtctcctcaacaaac      | gtttaagcggagataatggtggttagca | FS950639      |
| MSE0043              | (ta)7, (ag)10                     | ataggcgagagatcagctgaaaa    | gtttccatcttctgagtggtctctgc   | FS951029      |
| MSE0044              | (ta)11, (ag)6                     | atgcttagcagccatcattcaaca   | gtttcttttacgaaacaccgc        | FS948949      |
| MSE0045              | (ag)14                            | atggcgataacttcgagacacaaa   | gtttccctcctccttttaaggtt      | AB461368      |
| MSE0046              | (tc)14                            | actccctcacatcactctcagtcg   | gtttgagacagtgtagtctatcgggg   | FS950610      |
| MSE0047              | (tc)13                            | agatcatcttaaacccctaaaacc   | gtttgatgttggaatggtgaaggaga   | AB485970      |
| MSE0048              | (tc)9                             | ataaaagcctaaaccctcgaact    | gtttgcctggaacctgggaacttaac   | FS948085      |
| MSE0049              | (ag)14                            | atgtagcatttggcttattggatcac | gtttcctgtcaaagctcctctgtgg    | AB361047      |
| MSE0050              | (tc)14                            | attgagtcctcattgtccacac     | gtttctttgatcaggagtcagagga    | FS947935      |
| MSE0051              | (tc)15                            | acttgcaagtggaacaaactgttc   | gttttagctcagagacgtaggcatttct | AB461365      |
| MSE0052              | (tc)9                             | agttacggacttctgttagctggc   | gtttggttggtgtctgtgattctt     | AB505872      |
| MSE0053              | (tc)16                            | ataatcccaaaaattgtctcagtg   | gtttcacgatgagagtgtagaccgtt   | AB461367      |
| MSE0054              | (tc)15                            | atacaagaacgaaacaactcctccg  | gtttgagagctggaatggtgtctgagt  | FS947912      |
| MSE0055              | (ta)6                             | atcacgaaccactcctcctcat     | gtttgcagataatacactccaaccct   | FS949373      |
| MSE0056              | (tc)10                            | atccatccatcccatatc         | gtttcaacaacatcgtagaggcca     | AB361052      |
| MSE0057              | (tc)12                            | atctctctcacttccgttca       | gtttgactcatcagcagcaaggata    | FS951743      |
| MSE0058              | (tc)12                            | atcttattctcactcgcgaccag    | gttttagatttgatgctcaatgaacggt | FS951427      |
| MSE0059              | (gaa)11                           | attccgtgagagacgacgaag      | gtttgactttgtgtggtctttcc      | FS950702      |
| MSE0060 <sup>a</sup> | (tc)5,(tc)5,(tc)5,(tc)4           | attatcgaaacgtgtctcctca     | gtttaacaccggaatctccaataagcaa | FS948154      |
| MSE0061              | (tc)9                             | acacacatacaaccaaccaagc     | gtttgaggactctgcatcattacagc   | FS949588      |
| MSE0062              | (ag)18                            | acagagaacattgaacatcaagcc   | gttttaggttcttcccaatcgaact    | AB461364      |
| MSE0063              | (ag)9                             | acattctagaggagaaaaagtgtg   | gtttccagctctgtaaacgaccac     | AB505868      |
| MSE0064              | (ag)7                             | accagttaccaagcctcaaatca    | gtttccacagtgagttccacatcatt   | FS949747      |
| MSE0065              | (tc)15                            | agtcaacctaaccaacaaatca     | gtttcctgtaacatcatggtggctg    | FS949036      |
| MSE0066 <sup>a</sup> | (tc)4, (tc)4, (tc)3, (tc)4, (tc)3 | ataaagccagtgcccaactcgc     | gtttcagcaagatcagtcagt        | FS949044      |
| MSE0067              | (tc)18                            | atcttaagtctccctcttctcgt    | gtttggggattgagagggaatgtaa    | FS947993      |
| MSE0068              | (tc)9                             | acgtttattctctctcgtcag      | gtttgaggactcgaagaattgaagcca  | AB505871      |
| MSE0069              | (tc)17                            | atcttaccgctcctctctccact    | gtttcagtgccaggtggtgaaactgtag | FS952134      |
| MSE0070              | (tc)8                             | atcacctctcatcacccttctca    | gtttgcattcatggttccaagagagaga | AB505870      |
| MSE0071              | (tc)14                            | atcctccaccgaagtcgatcc      | gtttagaagttgttccctcaggccgaa  | AB505867      |
| MSE0072              | (tc)14                            | attcagtcaccctaccctctaaa    | gttttagcatccttgatacccttctgg  | AB361049      |

**Supplemental Table 3.** continued.

| marker name          | repeat region                        | fw primer for postlabel   | rv primer for postlabel      | accession no. |
|----------------------|--------------------------------------|---------------------------|------------------------------|---------------|
| MSE0073              | (tc)14                               | attcggctctctcctctctct     | gtttaacgaaggaacaagaagaagcac  | FS947738      |
| MSE0074              | (tc)7                                | acaatattccactcccccaaacac  | gtttgccctctgttctctctgtcc     | FS948120      |
| MSE0075              | (tc)12                               | acacgtttgtagcctaggtctca   | gtttaaatcaatgttcgatcgtctc    | FS949483      |
| MSE0076 <sup>a</sup> | (ca)3, (ac)4, (tat)3, (gta)3, (tgg)3 | acatccattcatcaacaagggaat  | gtttgctgattcccagctgtctt      | AB505869      |
| MSE0077              | (tc)10                               | accaggcgtctttgtatcgtctc   | gtttcgaatgcactctctcatttcg    | AB361050      |
| MSE0078              | (ag)16                               | actgcgtctcttctcctgcac     | gtttggagtcaattagggtgggtt     | AB461366      |
| MSE0079              | (ag)16                               | agtattcactttgcagagccca    | gtttagctttgaagataggtggcgatg  | AB505866      |
| MSE0080 <sup>a</sup> | (ac)4, (ta)4, (tca)3, (tc)5          | ataccctctcttcccatcacctt   | gtttaccagaacagaggacagagagca  | FS949599      |
| MSE0081              | (tc)9                                | atactttccccctctcctcctt    | gtttgttaccaccgtaaaagcca      | FS950583      |
| MSE0082              | (ta)13                               | atcaaaatccctcccccaaaa     | gtttcaaaactaagaaccaatgccacca | FS948901      |
| MSE0083              | (tct)6                               | atctgatcgaatcaccaatgcct   | gtttgaagaagagagagaagtcctg    | FS951085      |
| MSE0084              | (tc)16                               | atgctttcttcccactcttctg    | gtttgacgtcctcgaataagtgtct    | FS949655      |
| MSE0085              | (tc)9                                | atgtcacgaacatggcaccttt    | gtttcgctgcactctctctgtatt     | AB505865      |
| MSE0086              | (tc)16                               | attcctctatcttcccccaaaa    | gtttagggtatgatcgaactcttcca   | FS951412      |
| MSE0087              | (ag)13                               | atttttctcctactgcgccga     | gtttaaagccttgacgcgagacttcta  | AB505873      |
| MSE0088              | (tc)9                                | accaaacaaggcttagaccagaatg | gtttgctttgaagggttctgtt       | FS951504      |
| MSE0089              | (ag)7                                | accgtcttctcttctctctccc    | gtttaatcacctggaacagcggaa     | FS949251      |
| MSE0090              | (tc)15                               | acgaaccacaggaacaatctcaa   | gtttctttctgcttcccacagcatc    | FS950145      |
| MSE0091              | (ta)7,(ag)8                          | acgtcgttcttctgagatgtt     | gtttaagtcaacatgaagccaaccaat  | FS949737      |
| MSE0092              | (ag)12                               | actcatacaagccttcaagcacgc  | gtttcgtccctcctcctgaagaact    | FS949294      |
| MSE0093              | (tc)11                               | actgcatacacacctgactgaa    | gtttgaggactgacatggactgga     | FS948326      |
| MSE0094              | (ta)8                                | agaaaaccattctgcacaccact   | gtttatggaaggaactggaggtgga    | FS948521      |
| MSE0095              | (cct)9                               | agattcatcattgctttatctccc  | gtttagcctatcaccctcattgtgga   | FS948314      |
| MSE0096              | (tc)12                               | agctcttccagttcacctcata    | gtttacacaaatagccatcacctgtt   | FS951767      |
| MSE0097              | (ag)9                                | aggactgaaggagtagaaaatcca  | gtttcatgatgtaggtccaccgatt    | FS951041      |
| MSE0098              | (cca)6                               | atcccatctccatctccaatcca   | gtttgcaacaagctcaaaactcct     | FS951011      |
| MSE0099              | (ag)6                                | atctcagcttctctttacaacaca  | gtttatcaccggggcaaaaggtatg    | FS952164      |
| MSE0100              | (tc)15                               | atcttctcgtgtacatacaccccc  | gtttgaattgtggaggcctagaattg   | AB461370      |
| MSE0101              | (cca)6                               | atgctctcctctgtttacgccttg  | gtttacgaattctgaccacgaacctta  | FS950763      |
| MSE0102 <sup>a</sup> | (tc)5(ctc)3, (tc)4, (tc)3            | atttctccacctgcggtt        | gtttagaacggcagtgctaggtttt    | FS951686      |
| MSE0103              | (tc)14                               | acaagcaaaagcattacaaaaagc  | gtttcaccaactgaagaatcccat     | FS951354      |
| MSE0104              | (ag)14                               | acacaaccactctgcaccagacac  | gtttccggattcagtcagaattggag   | FS949898      |
| MSE0105              | (cca)6                               | acatccaaaacaaggaagctcca   | gtttgtgtggagattgagtggtg      | FS949892      |
| MSE0106              | (tc)6                                | acgcttcttcttctcatctcaa    | gtttcaacaagaagacagccaagacc   | FS947853      |
| MSE0107              | (tc)8                                | actctactcctcgcgaatctca    | gtttcaaagatgtgctctcgaacc     | AB485971      |
| MSE0108              | (tc)6,(ta)8                          | agtccatggtgtgatgatcctt    | gtttggagtaggattctgcagagc     | FS948805      |
| MSE0109              | (tc)10                               | ataaaagacaataccatcccaggaa | gtttccagaagtgaagaagggtgtc    | FS948318      |
| MSE0110              | (tc)11                               | atataatcgcggttccactcact   | gtttgattcatgctattgaaggctt    | FS950817      |
| MSE0111              | (tc)11                               | atatcagaagtgtggagagctct   | gtttaccattgaggaatgcgtgactt   | FS951008      |
| MSE0112 <sup>a</sup> | (ag)5, (ag)3, (tc)3, (tg)3           | atcagagtttccacatggacagt   | gtttcatctctgcttctcccttc      | FS947995      |
| MSE0113              | (tc)14                               | atccttctgcaactccagcaatcc  | gtttgagattgaccatcttcatcgga   | AB485972      |
| MSE0114              | (tc)14                               | atgctgtactcttccattctgc    | gtttcttttcagtcactgctgtgggc   | FS948705      |
| MSE0115              | (tc)7                                | attcacctagccctcgcatttcta  | gtttgtcatctccatcatccattcca   | FS948956      |
| MSE0116              | (tc)10                               | acacacttcacgctgcacttact   | gtttgtcgcagtaaaccttaccctc    | FS948104      |
| MSE0117 <sup>a</sup> | (aca)3, (ag)4, (ag)3(tg)3            | acacatgtaacctattacttagctc | gtttgaccaatggacggacaatatgac  | FS948642      |
| MSE0118              | (ag)9                                | acacattaagcccaccgctctt    | gtttaactgtagctgcacctggaacctc | FS949980      |

<sup>a</sup> All SSR motifs in these markers are less than 6 times repeats, but these markers were included in the analysis, because the total of repeats are more than 10.
