# Supplementary material for: Expressed sequence tags from organ-specific cDNA libraries of tea (Camellia sinensis) and polymorphisms and transferability of EST-SSRs across Camellia species
Source: PubMed Central journal article supplement — Breed Sci. 2012 Jun 19;62(2):186–95. doi: 10.1270/jsbbs.62.186 (PMC3405963; doi:10.1270/jsbbs.62.186), 2012-06-19
Supplement: 62_186_4.pdf [file 62_186_4.pdf]

**Supplemental Table 4.** Amplified fragment size data of EST-SSRs in 14 *Camellia* species

| Marker name | subgenus <i>Thea</i>    |                     | subgenus <i>Camellia</i> |                     |                         |                          |                       |
|-------------|-------------------------|---------------------|--------------------------|---------------------|-------------------------|--------------------------|-----------------------|
|             | <i>C. irrawadiensis</i> | <i>C. taliensis</i> | <i>C. japonica</i>       | <i>C. pitardi</i>   | <i>C. hongkongensis</i> | <i>C. chekiangoleosa</i> | <i>C. saluenensis</i> |
| MSE0019     | 109/136/140             | 112/125/129         | 131/151/169              | 114/145/156         | 140/145                 | 112/149/158/163          | -                     |
| MSE0021     | -                       | 269                 | 278/282                  | 278                 | -                       | -                        | 265/278               |
| MSE0022     | 175/189                 | 189                 | 180/186                  | 186/192/198         | 176/194                 | 186                      | 184/211               |
| MSE0023     | 197                     | 197/201             | 196/204                  | 184/197/200/212/227 | 179                     | -                        | 200                   |
| MSE0024     | 257                     | 259                 | 265/276                  | 245/259/263/270/274 | 268/282                 | 257/259                  | 256/266               |
| MSE0025     | 291/295                 | 280/287/291         | 272/280/288/295          | 270/295             | 285                     | 285/293                  | 293                   |
| MSE0026     | 294                     | 289                 | 272/285                  | 287/293             | 297/317                 | 285/287                  | 297                   |
| MSE0027     | 107/109                 | 109                 | -                        | 121                 | 110                     | -                        | -                     |
| MSE0029     | 382/384                 | 377                 | -                        | 364                 | 384/390                 | 373/380                  | 377                   |
| MSE0030     | 250/255                 | 255                 | 259                      | 239/248/257/261     | 248/255                 | 247/252/263              | 252/266               |
| MSE0035     | 233/237                 | 235                 | 246/254                  | 218/220/231         | 215                     | 222/233                  | 218/237               |
| MSE0037     | 189/214                 | 174/184/227/239     | 172/185/221/232          | 214/228/247         | 186/197                 | 214/231                  | 164/231/237           |
| MSE0038     | 297                     | 297                 | 304/322                  | 301/314             | 310                     | -                        | 303                   |
| MSE0039     | 140/144                 | 144                 | 150                      | 148                 | 144                     | 144                      | 148                   |
| MSE0040     | 151/160                 | 147/151             | 138/149                  | 142/153/157/161     | 138/165                 | 160/161                  | 142/147               |
| MSE0042     | 101/105                 | 103                 | 116                      | 101/105/108/110/112 | 112/114                 | 103/107/114              | 105                   |
| MSE0043     | 189                     | 174/184             | 172/185                  | -                   | 186/197                 | 192/203                  | 164/176               |
| MSE0044     | 134                     | 132                 | 111                      | -                   | 138                     | 127/130                  | -                     |
| MSE0045     | 229                     | 229                 | 226/241                  | 208/210/225         | 229/235                 | 223                      | 234/235               |
| MSE0047     | 275                     | 278/282             | 262/264                  | 259/273             | 264                     | 275/288                  | 268/273               |
| MSE0049     | 225/230                 | 228/232             | 220/222                  | 202                 | 210/238                 | 211/220                  | 202                   |
| MSE0050     | 273/276                 | 268/277             | 267/270                  | 261/263/268         | 255/259                 | 258/282                  | 267/272               |
| MSE0051     | 186                     | 199                 | 201/203                  | 186/189/191         | 174/176                 | 207                      | 188/190               |
| MSE0052     | 263                     | 261/263             | 263/270                  | 261                 | 261/263                 | 261/266                  | 261                   |
| MSE0053     | 253                     | -                   | 255/257                  | 248/251/254         | 251/254                 | 253/261                  | 263                   |
| MSE0054     | 180/181/187/189/194     | 180/187/189         | 185/191/194/197          | 181/185/189/193     | 180/194/201             | 193/197/201              | 191/197/199           |
| MSE0055     | 258                     | 258                 | 258/262                  | 258                 | 256/260                 | 237/258                  | 260                   |
| MSE0056     | 233                     | 223                 | 225/233                  | 225/227/231         | 220                     | 215                      | 220/230               |
| MSE0058     | 225/266/279/284         | 210                 | 258/264/268              | 263/264             | 267/298                 | 284                      | 262                   |
| MSE0059     | 200                     | 196/212             | 212/235                  | 204/211/213/219     | 217                     | 218/221                  | 210/223               |
| MSE0061     | 139                     | 141/147             | 158                      | 137/146             | 149/166                 | 155                      | 146                   |
| MSE0062     | 131                     | 131/133             | 119                      | 119                 | 129/139                 | 119/121                  | 118                   |
| MSE0063     | 238/251                 | 236/245             | 233                      | 234                 | 230/237/251             | 245                      | 233/241               |
| MSE0066     | 250                     | 250                 | -                        | 250                 | 250                     | -                        | -                     |
| MSE0067     | 147/152                 | 147/152             | -                        | -                   | -                       | -                        | -                     |
| MSE0068     | 264                     | 269                 | 258/259                  | 251/253/258/263     | 246/253                 | 242                      | 259/261               |
| MSE0069     | 200/217                 | 198/211             | 197                      | 211/218             | 214                     | 209/211                  | 211/213               |
| MSE0070     | 134                     | 141                 | -                        | 138                 | 125                     | 135                      | 125/129/151           |
| MSE0071     | 126/132                 | 114/118             | 128/130                  | 113/118/120/130     | 128                     | 113                      | 107/114/128           |

**Supplemental Table 4.** continued.

| Marker name | subgenus <i>Thea</i>    |                     | subgenus <i>Camellia</i> |                     |                         |                          |                       |
|-------------|-------------------------|---------------------|--------------------------|---------------------|-------------------------|--------------------------|-----------------------|
|             | <i>C. irrawadiensis</i> | <i>C. taliensis</i> | <i>C. japonica</i>       | <i>C. pitardi</i>   | <i>C. hongkongensis</i> | <i>C. chekiangoleosa</i> | <i>C. saluenensis</i> |
| MSE0072     | 298/320                 | 296/300             | 314/319                  | 295/308             | 279/294                 | 301                      | 304                   |
| MSE0074     | 212/218                 | 210                 | 204                      | 204/206/210         | 206                     | 204                      | 206                   |
| MSE0075     | 166/175                 | 175/182             | 152/164/166              | 166/171/177         | 166/185                 | 156                      | 166                   |
| MSE0076     | 247                     | 247                 | 247                      | 247/249             | 247/249                 | 247                      | 245/247               |
| MSE0077     | 154                     | 128                 | 117/128                  | 123/132/135/136/147 | 119                     | 136/151                  | 138                   |
| MSE0078     | 144/150                 | 148/166             | 144                      | 139/156             | 144                     | 141                      | 148                   |
| MSE0079     | 103/105/112             | 103/111             | 101/107                  | 95/97               | 105                     | 103/105                  | 95/97                 |
| MSE0080     | 238/245                 | 238                 | 238                      | 240                 | 238                     | 238                      | -                     |
| MSE0081     | 118                     | 118/126             | -                        | 116/120/126         | -                       | 126                      | 116                   |
| MSE0082     | 159/162/165             | 151/159/166         | 164                      | 149/162/163         | 151/163                 | 151/162                  | 150                   |
| MSE0083     | 237                     | 253/256             | 249/259                  | 242                 | 254/257                 | 240/246                  | 247                   |
| MSE0084     | 398/416                 | 408/410             | 404                      | 403/404             | 422                     | 404                      | 404                   |
| MSE0087     | 280/282                 | 279/280             | 282                      | 278/280             | 273                     | 282/286                  | 278                   |
| MSE0088     | 189                     | 180                 | -                        | -                   | -                       | -                        | -                     |
| MSE0089     | 292/303                 | 292                 | 285                      | 286/288/290         | 297/305                 | 295/301                  | 290                   |
| MSE0094     | 195                     | 193                 | 184                      | 186                 | 190                     | 184                      | 188                   |
| MSE0096     | 228                     | 241/243             | 243                      | 231/236/241         | 248/261                 | 233/235                  | 225/234/239           |
| MSE0098     | 257/275                 | 266                 | 266                      | 260/263             | 263                     | 260                      | 263                   |
| MSE0099     | 299/301                 | 301                 | 302/308/314/316          | 299/302/306/331     | 306                     | 302/325                  | 299/314/317           |
| MSE0100     | 254/262                 | 255/258             | -                        | 260/264             | 252/260                 | -                        | 267                   |
| MSE0101     | 247/263                 | 247/250             | 263                      | 240                 | 252/255                 | 263                      | 240/250               |
| MSE0102     | 331                     | 320/326             | 323                      | 321/327             | 320/328                 | 321/335                  | -                     |
| MSE0103     | 174/182                 | 176                 | 190                      | 170                 | 190                     | -                        | 170                   |
| MSE0106     | 150/165                 | 152/165             | 171                      | 151                 | 175/179                 | 161/179                  | 163                   |
| MSE0107     | 287/289                 | 311                 | 310/311                  | 313/319/321/325/329 | 306                     | 306/332                  | 315/327               |
| MSE0108     | 256                     | 266                 | 249/252                  | 250/252/256         | 252/257                 | 253/256                  | 255                   |
| MSE0109     | -                       | -                   | 117                      | 109                 | -                       | -                        | -                     |
| MSE0112     | 283                     | 283                 | 285                      | 283/285             | 283                     | 285                      | 283                   |
| MSE0113     | -                       | -                   | -                        | -                   | -                       | -                        | -                     |
| MSE0114     | 199                     | 202                 | -                        | -                   | -                       | -                        | -                     |
| MSE0116     | 179/183                 | 179                 | 178/188                  | 167/171/173/179     | 168                     | 177/183                  | 167/171               |
| MSE0117     | 110                     | 108/110             | 114/117                  | 114                 | 114/116                 | 116                      | 114                   |

Supplemental Table 4. continued.

| Marker name | subgenus <i>Camellia</i> |                        |                     |                      | subgenus <i>Metacamellia</i> |                       | subgenus <i>Protocamellia</i> |
|-------------|--------------------------|------------------------|---------------------|----------------------|------------------------------|-----------------------|-------------------------------|
|             | <i>C. kissi</i>          | <i>C. oleifera</i>     | <i>C. sasanqua</i>  | <i>C. furfuracea</i> | <i>C. cuspidata</i>          | <i>C. salicifolia</i> | <i>C. granthamiana</i>        |
| MSE0019     | 125/127                  | 129                    | 126/137/161         | 129/161              | 136                          | 108/147               | 124/129/156                   |
| MSE0021     | -                        | -                      | -                   | 278                  | 309                          | 271/278               | -                             |
| MSE0022     | 178/186                  | 186/190/194            | 159/176/182         | 192                  | 176/196                      | 184/194               | 157/159/178                   |
| MSE0023     | 195                      | 180/184/192/203        | 184/186/198/211/219 | 191/195              | 192                          | -                     | 198                           |
| MSE0024     | 265/272                  | 266/273/291            | 245/269/275/287     | 261/282              | 253/255                      | 251                   | 254/260/267                   |
| MSE0025     | 284                      | 287/295/306            | 281/288             | 266/284              | 291                          | 302                   | 275/281/284                   |
| MSE0026     | 289                      | 282/289/296            | 284/285/292         | 291                  | 285                          | 282/284               | 272/276                       |
| MSE0027     | -                        | -                      | -                   | 114                  | 124                          | -                     | -                             |
| MSE0029     | -                        | -                      | 338                 | 367                  | 388/390                      | 374                   | 368/374/390                   |
| MSE0030     | 255                      | 244/261                | 241/250/252/255/259 | 261/274              | 257                          | 252/257               | 254/255                       |
| MSE0035     | 227/231/235/239          | 222/233/235            | 226/234             | 212/217              | -                            | 229/248               | 222/227/235                   |
| MSE0037     | 164/231/245              | 168/218/221/222        | 218/227             | 256/262              | 208/214/228                  | 228                   | 167/169/185/222/227/23        |
| MSE0038     | 313                      | 306/308/314            | 307                 | 307/308              | 303/305                      | 309/324               | 299                           |
| MSE0039     | 154                      | 151/157                | 146/152/154/162     | 156/177              | 135/136/144/146              | 154                   | 148                           |
| MSE0040     | 142/147                  | 142/149/151/153/160    | 153/155/161/168/170 | 151/153              | 144/147                      | 140                   | 155/160/164                   |
| MSE0042     | 107/110                  | 107/112                | 102/112/114         | -                    | -                            | 106/110               | 101/110                       |
| MSE0043     | 164/191                  | 162/168/172            | 184/191/194         | -                    | 177                          | 194                   | 167/169/184                   |
| MSE0044     | 116/127                  | 127/129/131            | 121/131             | 132                  | -                            | -                     | 130/138/144                   |
| MSE0045     | 236/242                  | 228/236/240            | 231/232/235/237/241 | 218                  | 236                          | 234/238               | 229/234                       |
| MSE0047     | 280                      | 268/280                | 264/277/280/285     | 268/278              | 253/256                      | 245                   | 284/289                       |
| MSE0049     | 211                      | 211                    | 209/211/215         | 213/217              | 211                          | 224/226               | 228/230/261                   |
| MSE0050     | 256/265                  | 255/263/267            | 262/267             | 255/262              | 272/277                      | 268/271               | 267                           |
| MSE0051     | 185/191                  | 185/191/199            | 188/199             | 184/190              | 195                          | 191/201               | 186/192/201                   |
| MSE0052     | 261/264                  | 261                    | 261/263             | 261                  | -                            | 261                   | 261                           |
| MSE0053     | 249/264                  | 250/259/264/275        | 246                 | 251                  | -                            | 250                   | 270/283                       |
| MSE0054     | 182/193                  | 182/189/194            | 180/189/191         | 187/191              | 191/194/197                  | 194/197/202           | 189/197/199                   |
| MSE0055     | 244/258                  | 258/260                | 258/260             | 258                  | 258                          | 258                   | 258/259                       |
| MSE0056     | -                        | 235/239                | 229/235/241/253/256 | 233                  | 217                          | 229                   | 220                           |
| MSE0058     | 275/281                  | 222/262/273/288/302    | 260/267/279         | 230                  | 212                          | 189                   | 213/218                       |
| MSE0059     | 220/223                  | 194/198/212/213        | 194/196/198/203     | 211                  | 201                          | 220/228               | 198/203/210                   |
| MSE0061     | 167                      | 148/162                | 141/142/147/149/157 | -                    | 157/161                      | 142/151               | 137                           |
| MSE0062     | 123                      | 131                    | 114/118/119/135     | 135/139              | 123/131                      | 129                   | 119/121                       |
| MSE0063     | 247/251                  | 230/234/245/253/256/26 | 233/236/256         | 230/234/237/241/243  | 220/230/253/262              | 234/238/245           | 234/247/249/251               |
| MSE0066     | -                        | -                      | -                   | -                    | -                            | -                     | 250                           |
| MSE0067     | -                        | 158/166                | 149                 | -                    | -                            | -                     | -                             |
| MSE0068     | 253/264                  | 249                    | 249/253             | 257/258              | 249                          | 264                   | 251/264/266                   |
| MSE0069     | 207                      | 221                    | 212/237             | 198                  | -                            | -                     | -                             |
| MSE0070     | 125                      | 134/141/146            | 134                 | -                    | 142                          | -                     | 129/135                       |
| MSE0071     | 114/120                  | 117                    | 118                 | 118/120              | -                            | 114/117/126/145       | 118                           |

**Supplemental Table 4.** continued.

| Marker name | subgenus <i>Camellia</i> |                        |                     |                      | subgenus <i>Metacamellia</i> |                       | subgenus <i>Protocamellia</i> |
|-------------|--------------------------|------------------------|---------------------|----------------------|------------------------------|-----------------------|-------------------------------|
|             | <i>C. kissi</i>          | <i>C. oleifera</i>     | <i>C. sasanqua</i>  | <i>C. furfuracea</i> | <i>C. cuspidata</i>          | <i>C. salicifolia</i> | <i>C. granthamiana</i>        |
| MSE0072     | 308/312                  | 307/315                | 313/318             | 299                  | 294                          | 292                   | 305/316/318                   |
| MSE0074     | 204/206                  | 202/206                | 204                 | 203                  | -                            | 204                   | 204/223                       |
| MSE0075     | 173/175                  | 166/175/182            | 160/175             | 173/187/199          | ?/179/187                    | 170/175               | 174/189                       |
| MSE0076     | 254                      | 247/249                | -                   | 247                  | 247                          | 247                   | 247                           |
| MSE0077     | 128                      | 128/138                | 117/128/132         | 132/138              | 128/129                      | 124/134               | 134/142/145                   |
| MSE0078     | 146                      | 146/150                | 139/148/160/166/168 | 158                  | 146/148                      | 141                   | 148/156                       |
| MSE0079     | 99/101                   | 97/111                 | 97/99/101           | 103                  | 107/116                      | 105/112               | 95/111                        |
| MSE0080     | 238                      | 227/234/238            | 238                 | 236/240              | 227                          | 227                   | 238                           |
| MSE0081     | -                        | -                      | -                   | 104/106              | 105/108                      | -                     | 116/128                       |
| MSE0082     | 164/165                  | 154                    | 154/156/164         | -                    | 160/161                      | 174/176               | 162/163/166                   |
| MSE0083     | 240                      | 240/244/247            | 236/244             | 256/268              | 243                          | 249/252               | 247                           |
| MSE0084     | 403/416                  | 404/409                | 404/409             | 414/429              | 412                          | 412/424               | 404                           |
| MSE0087     | 275                      | 283                    | 278/286             | 272/273              | 273/276                      | 273/278               | 272/278                       |
| MSE0088     | -                        | -                      | -                   | -                    | -                            | 195/196               | -                             |
| MSE0089     | 295/305                  | 285/288/295/299/303/30 | 290/293/295/297/301 | 294/311              | 295/307                      | 283/285               | 288/290/292/307               |
| MSE0094     | 184                      | 184                    | 184                 | 188                  | 186/188/191                  | 190/191               | 186/188/227                   |
| MSE0096     | 237/251                  | 229/244/258            | 229/247             | 235                  | 222/230/240                  | 234                   | 236/250                       |
| MSE0098     | 260/269                  | 263                    | 254/263/269         | 263/266              | 263                          | 257/266               | 263/266                       |
| MSE0099     | 306/312/323/329          | 297/307/308/321/325    | 308/317             | 306                  | 299                          | 303                   | 299                           |
| MSE0100     | -                        | -                      | -                   | -                    | 247/250                      | -                     | 238/245                       |
| MSE0101     | 263                      | 240/263/269            | 240/263             | 250                  | 244                          | 240/252               | 240/247                       |
| MSE0102     | 325                      | 312/315/324/328        | 300/315/318/346     | 311                  | 309/345                      | 336/372               | -                             |
| MSE0103     | 182/194                  | 184                    | 190/198             | 182/184              | 182/196                      | 186/188               | 174/182/190                   |
| MSE0106     | 152/155                  | 144/151/167/183        | 152                 | 165                  | 163                          | 149                   | 159/175                       |
| MSE0107     | 317/321                  | 315/319/323            | 311/315/319/323     | 308/317              | 304/317                      | 289/303               | 308/319/321/323               |
| MSE0108     | 249/255                  | 251/256                | 249/251             | 252                  | 247                          | 253/256               | 251/252                       |
| MSE0109     | -                        | 117/125/127            | 125/127             | -                    | -                            | -                     | 103                           |
| MSE0112     | 285                      | 285/289                | 285                 | 283                  | 285                          | 283                   | 285                           |
| MSE0113     | -                        | -                      | -                   | -                    | -                            | -                     | -                             |
| MSE0114     | -                        | -                      | -                   | -                    | -                            | -                     | -                             |
| MSE0116     | 174                      | 169/172/173            | 174/177/185         | 166                  | 165/175                      | 172                   | 162/172                       |
| MSE0117     | 112                      | 114                    | 106/116/117         | 114                  | 114                          | 125/131               | 114                           |
